# Supplementary material for: Near-Single-Cell Proteomics Profiling of the Proximal Tubular and Glomerulus of the Normal Human Kidney
Source: Front Med (Lausanne). 2020 Sep 17;7:499. doi: 10.3389/fmed.2020.00499 (PMC7533534; doi:10.3389/fmed.2020.00499)
Supplement: Supplementary file 2 [file Table_2.xlsx]

## Sheet: OSU
Accession	Description	ΣCoverage	Σ# Proteins	Σ# Unique Peptides	Σ# Peptides	Σ# PSMs	A7: Area	B7: Area	Score 142	Coverage 142	# Peptides 142	# PSM 142	Score 162	Coverage 162	# Peptides 162	# PSM 162	# AAs	MW [kDa]	calc. pI
P02768	Serum albumin OS=Homo sapiens GN=ALB PE=1 SV=2 - [ALBU_HUMAN]	89.16	8	76	80	743	1.2582e+09	3.87433e+09	897.896	85.71	66	294	1452.21	89.16	80	449	609	69.3215	6.27783
P60709	Actin, cytoplasmic 1 OS=Homo sapiens GN=ACTB PE=1 SV=1 - [ACTB_HUMAN]	70.4	18	8	27	283	4.19196e+08	1.85434e+09	276.907	66.13	24	97	559.193	70.4	27	186	375	41.7097	5.47803
O43707	Alpha-actinin-4 OS=Homo sapiens GN=ACTN4 PE=1 SV=2 - [ACTN4_HUMAN]	77.17	13	42	74	257	2.8702e+07	1.19084e+08	234.45	62.9	47	91	496.519	77.17	73	166	911	104.788	5.43994
P04406	Glyceraldehyde-3-phosphate dehydrogenase OS=Homo sapiens GN=GAPDH PE=1 SV=3 - [G3P_HUMAN]	79.7	3	34	34	249	2.93028e+08	9.81339e+08	249.121	66.57	27	87	529.441	79.7	33	162	335	36.0304	8.45557
	>sp|TRFE_HUMAN|	68.62	8	66	66	280	9.70178e+07	1.84912e+08	353.064	67.48	54	124	495.94	68.62	65	156	698	76.9996	7.12256
P98164	Low-density lipoprotein receptor-related protein 2 OS=Homo sapiens GN=LRP2 PE=1 SV=3 - [LRP2_HUMAN]	30.2	4	114	114	274	1.91743e+07	4.31322e+07	234.546	20.69	82	118	350.48	27.58	101	156	4655	521.616	5.08447
P10809	60 kDa heat shock protein, mitochondrial OS=Homo sapiens GN=HSPD1 PE=1 SV=2 - [CH60_HUMAN]	86.04	7	54	54	263	1.73203e+08	3.20974e+08	340.327	71.38	42	108	511.907	81.68	50	155	573	61.0164	5.87158
P62736	Actin, aortic smooth muscle OS=Homo sapiens GN=ACTA2 PE=1 SV=1 - [ACTA_HUMAN]	74.27	8	14	28	213	3.22999e+08	1.0496e+09	154.672	57.03	21	67	377.606	74.27	28	146	377	41.9818	5.38916
	>sp|HBB_HUMAN|	95.89	6	14	20	263	2.13723e+09	2.78001e+09	358.472	95.89	18	121	435.428	95.89	20	142	146	15.8573	7.28369
P35579	Myosin-9 OS=Homo sapiens GN=MYH9 PE=1 SV=4 - [MYH9_HUMAN]	55.05	18	87	102	212	8.91637e+06	3.13418e+07	161.167	32.45	56	72	337.19	52.81	94	140	1960	226.392	5.60498
P68371	Tubulin beta-4B chain OS=Homo sapiens GN=TUBB4B PE=1 SV=1 - [TBB4B_HUMAN]	76.4	17	2	32	251	1.2351e+08	3.30876e+08	316.316	70.79	26	113	410.98	76.4	31	138	445	49.799	4.89404
Q5HY54	Filamin-A OS=Homo sapiens GN=FLNA PE=1 SV=1 - [Q5HY54_HUMAN]	44.46	8	86	90	192	1.64062e+07	8.53596e+07	121.638	26.43	45	54	373.303	43.92	89	138	2607	276.378	6.04932
P50440	Glycine amidinotransferase, mitochondrial OS=Homo sapiens GN=GATM PE=1 SV=1 - [GATM_HUMAN]	79.43	3	33	33	252	2.63388e+08	6.01856e+08	346.972	68.56	29	118	422.018	73.52	28	134	423	48.4243	8.04541
P06576	ATP synthase subunit beta, mitochondrial OS=Homo sapiens GN=ATP5B PE=1 SV=3 - [ATPB_HUMAN]	76.18	5	32	32	225	1.91241e+08	4.30304e+08	276.789	63.89	26	91	433.208	74.86	30	134	529	56.5246	5.40186
P40939	Trifunctional enzyme subunit alpha, mitochondrial OS=Homo sapiens GN=HADHA PE=1 SV=2 - [ECHA_HUMAN]	78.11	3	63	63	271	1.03284e+08	7.64728e+07	395.435	70.9	54	143	375.225	78.11	59	128	763	82.9469	9.0415
P07437	Tubulin beta chain OS=Homo sapiens GN=TUBB PE=1 SV=2 - [TBB5_HUMAN]	76.58	15	5	31	231	1.1218e+08	3.30876e+08	285.656	64.86	24	103	393.981	76.58	30	128	444	49.639	4.89404
P01024	Complement C3 OS=Homo sapiens GN=C3 PE=1 SV=2 - [CO3_HUMAN]	63.02	4	83	83	213	2.09516e+07	5.72299e+07	213.978	47.02	63	89	344.848	58.45	74	124	1663	187.03	6.40479
Q99798	Aconitate hydratase, mitochondrial OS=Homo sapiens GN=ACO2 PE=1 SV=2 - [ACON_HUMAN]	62.82	2	57	57	213	1.13751e+08	2.03986e+08	251.718	54.62	47	89	347.856	61.92	55	124	780	85.3719	7.60596
Q9Y490	Talin-1 OS=Homo sapiens GN=TLN1 PE=1 SV=3 - [TLN1_HUMAN]	48.92	1	77	84	188	7.9191e+06	2.58403e+07	140.981	28.1	50	65	322.213	46.52	80	123	2541	269.599	6.07471
Q02252	Methylmalonate-semialdehyde dehydrogenase [acylating], mitochondrial OS=Homo sapiens GN=ALDH6A1 PE=1 SV=2 - [MMSA_HUMAN]	70.28	2	44	44	210	1.49227e+08	2.18264e+08	264.176	64.11	39	90	372.804	70.28	42	120	535	57.8027	8.49951
P25705	ATP synthase subunit alpha, mitochondrial OS=Homo sapiens GN=ATP5A1 PE=1 SV=1 - [ATPA_HUMAN]	67.27	7	46	46	205	2.10268e+08	3.87105e+08	252.444	63.83	36	85	376.417	66.18	45	120	553	59.7136	9.12939
P07900	Heat shock protein HSP 90-alpha OS=Homo sapiens GN=HSP90AA1 PE=1 SV=5 - [HS90A_HUMAN]	61.61	6	30	50	202	7.38828e+07	1.4248e+08	204.949	49.32	41	82	321.393	60.25	47	120	732	84.6067	5.021
Q09666	Neuroblast differentiation-associated protein AHNAK OS=Homo sapiens GN=AHNAK PE=1 SV=2 - [AHNK_HUMAN]	38.83	6	91	94	144	4.94773e+06	2.41516e+07	38.5843	13.74	22	24	269.323	38.47	92	120	5890	628.699	6.15088
P06733	Alpha-enolase OS=Homo sapiens GN=ENO1 PE=1 SV=2 - [ENOA_HUMAN]	81.11	9	34	38	183	1.43634e+08	4.10541e+08	184.329	61.75	30	65	379.514	79.72	37	118	434	47.1393	7.38623
Q13885	Tubulin beta-2A chain OS=Homo sapiens GN=TUBB2A PE=1 SV=1 - [TBB2A_HUMAN]	74.61	10	2	30	207	9.23447e+07	2.97796e+08	254.841	57.53	23	90	342.637	74.61	29	117	445	49.875	4.89404
Q9BVA1	Tubulin beta-2B chain OS=Homo sapiens GN=TUBB2B PE=1 SV=1 - [TBB2B_HUMAN]	74.61	10	2	30	206	9.23447e+07	2.97796e+08	250.309	56.63	22	89	342.547	74.61	29	117	445	49.9209	4.89404
P05023	Sodium/potassium-transporting ATPase subunit alpha-1 OS=Homo sapiens GN=ATP1A1 PE=1 SV=1 - [AT1A1_HUMAN]	47.12	15	48	48	162	3.69571e+07	2.05502e+08	114.112	31.18	28	47	333.369	47.12	48	115	1023	112.824	5.49072
P24752	Acetyl-CoA acetyltransferase, mitochondrial OS=Homo sapiens GN=ACAT1 PE=1 SV=1 - [THIL_HUMAN]	74.71	3	38	40	191	1.28353e+08	2.70856e+08	242.722	68.15	33	77	384.04	74.71	39	114	427	45.1706	8.85107
P26038	Moesin OS=Homo sapiens GN=MSN PE=1 SV=3 - [MOES_HUMAN]	80.42	3	40	53	173	3.18499e+07	1.1162e+08	111.695	58.75	33	60	276.424	79.03	52	113	577	67.7778	6.40479
P05062	Fructose-bisphosphate aldolase B OS=Homo sapiens GN=ALDOB PE=1 SV=2 - [ALDOB_HUMAN]	64.84	2	26	26	208	5.36224e+08	7.67397e+08	338.426	60.16	22	96	388.118	64.84	26	112	364	39.4481	7.86963
P00558	Phosphoglycerate kinase 1 OS=Homo sapiens GN=PGK1 PE=1 SV=3 - [PGK1_HUMAN]	90.65	2	39	39	185	9.48952e+07	2.65701e+08	209.083	71.94	28	73	354.09	90.65	39	112	417	44.5861	8.104
	>sp|HBA_HUMAN|	98.58	4	15	15	187	6.66824e+08	1.35349e+09	233.931	92.2	10	76	397.218	98.58	15	111	141	15.1169	8.67529
P04350	Tubulin beta-4A chain OS=Homo sapiens GN=TUBB4A PE=1 SV=2 - [TBB4A_HUMAN]	69.37	22	2	27	198	1.17163e+08	3.30876e+08	233.91	61.49	20	88	308.264	67.57	25	110	444	49.5539	4.88135
P14618	Pyruvate kinase PKM OS=Homo sapiens GN=PKM PE=1 SV=4 - [KPYM_HUMAN]	77.59	11	44	46	171	5.63952e+07	2.39353e+08	183.592	67.98	30	62	353.793	77.59	46	109	531	57.9	7.84033
P14625	Endoplasmin OS=Homo sapiens GN=HSP90B1 PE=1 SV=1 - [ENPL_HUMAN]	57.41	5	49	51	163	3.64519e+07	1.0354e+08	144.232	47.95	37	61	287.849	53.92	47	102	803	92.4113	4.84326
P05091	Aldehyde dehydrogenase, mitochondrial OS=Homo sapiens GN=ALDH2 PE=1 SV=2 - [ALDH2_HUMAN]	64.6	4	35	38	183	1.01441e+08	1.84237e+08	226.013	64.6	35	82	276.731	64.6	37	101	517	56.3456	7.04932
P08238	Heat shock protein HSP 90-beta OS=Homo sapiens GN=HSP90AB1 PE=1 SV=4 - [HS90B_HUMAN]	63.12	5	25	46	178	7.38828e+07	1.4248e+08	186.515	50.83	39	79	265.403	58.15	41	99	724	83.2121	5.03369
P00367	Glutamate dehydrogenase 1, mitochondrial OS=Homo sapiens GN=GLUD1 PE=1 SV=2 - [DHE3_HUMAN]	68.1	2	14	33	182	2.28591e+08	3.00926e+08	242.337	62.54	31	90	286.02	68.1	33	92	558	61.3592	7.79639
O60494	Cubilin OS=Homo sapiens GN=CUBN PE=1 SV=5 - [CUBN_HUMAN]	26.66	4	70	70	163	1.64169e+07	3.46747e+07	140.556	18.52	50	71	210.888	23.63	60	92	3623	398.48	5.35107
P42765	3-ketoacyl-CoA thiolase, mitochondrial OS=Homo sapiens GN=ACAA2 PE=1 SV=2 - [THIM_HUMAN]	84.63	6	35	35	186	4.19339e+08	2.59446e+08	333.111	77.58	30	95	317.787	84.38	33	91	397	41.8976	8.08936
P07355	Annexin A2 OS=Homo sapiens GN=ANXA2 PE=1 SV=2 - [ANXA2_HUMAN]	76.11	24	37	37	134	2.85698e+07	1.60023e+08	96.2499	63.13	25	43	251.964	74.93	36	91	339	38.5798	7.75244
P01009	Alpha-1-antitrypsin OS=Homo sapiens GN=SERPINA1 PE=1 SV=3 - [A1AT_HUMAN]	67.22	8	36	36	126	5.10286e+07	2.27895e+08	90.877	53.35	20	35	283.491	67.22	35	91	418	46.707	5.59229
P11142	Heat shock cognate 71 kDa protein OS=Homo sapiens GN=HSPA8 PE=1 SV=1 - [HSP7C_HUMAN]	56.81	14	26	40	149	8.72237e+07	2.59639e+08	143.316	42.41	28	59	272.882	56.81	40	90	646	70.8542	5.51611
P18206	Vinculin OS=Homo sapiens GN=VCL PE=1 SV=4 - [VINC_HUMAN]	53.17	3	52	52	129	1.13203e+07	3.14718e+07	78.4766	34.57	32	40	195.006	53.17	49	89	1134	123.722	5.65576
P12814	Alpha-actinin-1 OS=Homo sapiens GN=ACTN1 PE=1 SV=2 - [ACTN1_HUMAN]	59.19	14	25	49	133	2.58451e+07	9.52593e+07	91.9873	35.31	25	45	238.474	55.72	47	88	892	102.993	5.41455
P0DMV9	Heat shock 70 kDa protein 1B OS=Homo sapiens GN=HSPA1B PE=1 SV=1 - [HS71B_HUMAN]	66.46	4	37	43	129	7.56711e+07	2.42004e+08	99.8438	43.21	22	41	230.602	66.15	41	88	641	70.009	5.65576
P07195	L-lactate dehydrogenase B chain OS=Homo sapiens GN=LDHB PE=1 SV=2 - [LDHB_HUMAN]	61.38	11	24	26	138	1.7153e+08	4.0829e+08	142.677	48.2	19	54	250.237	61.38	26	84	334	36.6151	6.04932
P15144	Aminopeptidase N OS=Homo sapiens GN=ANPEP PE=1 SV=4 - [AMPN_HUMAN]	40.12	4	43	43	143	2.77663e+07	7.86417e+07	148.858	31.54	33	61	210.505	38.99	41	82	967	109.471	5.47803
P38646	Stress-70 protein, mitochondrial OS=Homo sapiens GN=HSPA9 PE=1 SV=2 - [GRP75_HUMAN]	58.17	5	37	37	145	3.67203e+07	8.17294e+07	141.104	45.95	30	65	235.052	58.17	35	80	679	73.6348	6.16357
P06744	Glucose-6-phosphate isomerase OS=Homo sapiens GN=GPI PE=1 SV=4 - [G6PI_HUMAN]	57.17	14	30	30	119	2.6641e+07	1.05897e+08	88.7629	37.46	18	39	215.002	57.17	30	80	558	63.1072	8.32373
Q96KP4	Cytosolic non-specific dipeptidase OS=Homo sapiens GN=CNDP2 PE=1 SV=2 - [CNDP2_HUMAN]	70.32	17	31	31	140	7.75081e+07	1.85843e+08	156.154	61.05	24	61	227.436	70.32	28	79	475	52.8449	5.97314
O75369	Filamin-B OS=Homo sapiens GN=FLNB PE=1 SV=2 - [FLNB_HUMAN]	32.4	5	55	60	118	8.22156e+06	6.26959e+07	63.3755	16.72	32	39	181.736	31.17	56	79	2602	277.99	5.73193
P01023	Alpha-2-macroglobulin OS=Homo sapiens GN=A2M PE=1 SV=3 - [A2MG_HUMAN]	46.34	4	49	49	106	6.73183e+06	4.47909e+07	56.2669	24.22	24	27	205.41	45.79	48	79	1474	163.188	6.45557
Q93088	Betaine--homocysteine S-methyltransferase 1 OS=Homo sapiens GN=BHMT PE=1 SV=2 - [BHMT1_HUMAN]	69.7	2	24	29	146	1.06746e+08	1.16061e+08	185.244	69.21	26	68	241.131	68.47	26	78	406	44.9699	7.03467
P08133	Annexin A6 OS=Homo sapiens GN=ANXA6 PE=1 SV=3 - [ANXA6_HUMAN]	75.63	9	19	50	136	1.81825e+07	4.51157e+07	118.025	63	38	58	198.887	70.73	45	78	673	75.8256	5.60498
P08670	Vimentin OS=Homo sapiens GN=VIM PE=1 SV=4 - [VIME_HUMAN]	73.18	31	37	40	116	1.78601e+07	7.66598e+07	81.1353	60.3	28	39	194.01	72.96	39	77	466	53.6191	5.12256
P00352	Retinal dehydrogenase 1 OS=Homo sapiens GN=ALDH1A1 PE=1 SV=2 - [AL1A1_HUMAN]	72.26	5	32	35	111	4.78184e+07	1.72473e+08	87.8507	54.09	21	34	229.936	69.46	33	77	501	54.827	6.72705
Q01082	Spectrin beta chain, non-erythrocytic 1 OS=Homo sapiens GN=SPTBN1 PE=1 SV=2 - [SPTB2_HUMAN]	35.66	4	61	64	127	7.54945e+06	1.36972e+07	94.8842	23.69	42	52	162.568	32.45	55	75	2364	274.439	5.56689
E7EQR4	Ezrin OS=Homo sapiens GN=EZR PE=1 SV=3 - [E7EQR4_HUMAN]	66.72	5	30	42	116	3.18499e+07	1.1162e+08	73.4831	40.61	27	41	205.306	61.95	37	75	586	69.3287	6.16357
P60174	Triosephosphate isomerase OS=Homo sapiens GN=TPI1 PE=1 SV=3 - [TPIS_HUMAN]	80.42	4	25	25	121	1.37175e+08	4.62464e+08	143.754	69.23	19	48	250.087	76.57	24	73	286	30.7717	5.92236
P11021	78 kDa glucose-regulated protein OS=Homo sapiens GN=HSPA5 PE=1 SV=2 - [GRP78_HUMAN]	48.93	3	30	32	115	5.59259e+07	1.72363e+08	116.247	42.66	24	43	213.345	48.93	31	72	654	72.2884	5.16064
Q00610	Clathrin heavy chain 1 OS=Homo sapiens GN=CLTC PE=1 SV=5 - [CLH1_HUMAN]	36.72	9	53	53	105	1.33211e+07	3.87502e+07	70.6759	23.34	30	33	181.775	35.76	51	72	1675	191.493	5.69385
P30038	Delta-1-pyrroline-5-carboxylate dehydrogenase, mitochondrial OS=Homo sapiens GN=ALDH4A1 PE=1 SV=3 - [AL4A1_HUMAN]	63.77	2	32	32	142	2.00769e+08	1.37187e+08	178.639	51.51	25	71	187.7	63.77	32	71	563	61.6806	8.07471
P30084	Enoyl-CoA hydratase, mitochondrial OS=Homo sapiens GN=ECHS1 PE=1 SV=4 - [ECHM_HUMAN]	74.14	1	24	24	134	8.70362e+07	1.65577e+08	194.362	74.14	24	63	212.451	66.55	19	71	290	31.3671	8.07471
Q03154	Aminoacylase-1 OS=Homo sapiens GN=ACY1 PE=1 SV=1 - [ACY1_HUMAN]	80.15	13	28	28	124	1.14043e+08	2.14006e+08	121.666	65.44	24	53	205.189	80.15	28	71	408	45.856	6.17627
P11310	Medium-chain specific acyl-CoA dehydrogenase, mitochondrial OS=Homo sapiens GN=ACADM PE=1 SV=1 - [ACADM_HUMAN]	64.37	6	30	30	131	1.12953e+08	1.21862e+08	152.593	50.59	23	61	205.025	64.37	30	70	421	46.5586	8.36768
Q71U36	Tubulin alpha-1A chain OS=Homo sapiens GN=TUBA1A PE=1 SV=1 - [TBA1A_HUMAN]	70.95	14	1	27	125	9.93305e+07	2.32156e+08	155.023	57.21	22	55	220.809	70.95	26	70	451	50.1036	5.05908
P02675	Fibrinogen beta chain OS=Homo sapiens GN=FGB PE=1 SV=2 - [FIBB_HUMAN]	62.53	2	37	37	113	1.93228e+07	6.66822e+07	103.849	52.34	29	43	192.688	61.1	33	70	491	55.8923	8.26514
A0A1B0GTG2	Alpha-aminoadipic semialdehyde dehydrogenase OS=Homo sapiens GN=ALDH7A1 PE=1 SV=1 - [A0A1B0GTG2_HUMAN]	62.31	19	31	31	108	1.7316e+07	9.8052e+07	102.282	56.16	23	38	200.243	62.31	31	70	536	58.103	8.1333
Q9BQE3	Tubulin alpha-1C chain OS=Homo sapiens GN=TUBA1C PE=1 SV=1 - [TBA1C_HUMAN]	71.27	13	2	27	126	9.93305e+07	2.32156e+08	160.425	57.46	22	57	219.35	71.27	26	69	449	49.8635	5.09717
Q06830	Peroxiredoxin-1 OS=Homo sapiens GN=PRDX1 PE=1 SV=1 - [PRDX1_HUMAN]	76.88	3	20	24	124	1.43692e+08	3.3486e+08	132.697	76.88	23	55	219.609	76.88	24	69	199	22.0963	8.1333
Q13509	Tubulin beta-3 chain OS=Homo sapiens GN=TUBB3 PE=1 SV=2 - [TBB3_HUMAN]	36.22	13	2	15	124	9.00149e+07	1.63431e+08	160.776	27.56	12	56	212.356	36	14	68	450	50.4003	4.93213
O95831	Apoptosis-inducing factor 1, mitochondrial OS=Homo sapiens GN=AIFM1 PE=1 SV=1 - [AIFM1_HUMAN]	55.79	2	33	33	123	5.59223e+07	9.63965e+07	156.813	43.72	24	55	200.563	55.79	32	68	613	66.8589	8.95361
P05165	Propionyl-CoA carboxylase alpha chain, mitochondrial OS=Homo sapiens GN=PCCA PE=1 SV=4 - [PCCA_HUMAN]	58.93	11	40	40	121	2.54104e+07	4.64738e+07	136.018	45.6	33	54	181.935	56.46	38	67	728	80.0081	7.51807
P48735	Isocitrate dehydrogenase [NADP], mitochondrial OS=Homo sapiens GN=IDH2 PE=1 SV=2 - [IDHP_HUMAN]	55.97	2	27	28	121	7.30357e+07	1.68718e+08	153.009	51.33	23	54	200.733	55.97	28	67	452	50.8769	8.68994
P68366	Tubulin alpha-4A chain OS=Homo sapiens GN=TUBA4A PE=1 SV=1 - [TBA4A_HUMAN]	61.61	9	6	24	120	9.062e+07	1.61757e+08	143.087	55.36	21	53	205.106	61.61	23	67	448	49.8924	5.05908
P80404	4-aminobutyrate aminotransferase, mitochondrial OS=Homo sapiens GN=ABAT PE=1 SV=3 - [GABT_HUMAN]	77	7	33	33	111	2.4533e+07	9.49187e+07	113.717	65.6	25	44	183.605	76.8	32	67	500	56.4026	7.95752
Q08AH3	Acyl-coenzyme A synthetase ACSM2A, mitochondrial OS=Homo sapiens GN=ACSM2A PE=1 SV=2 - [ACS2A_HUMAN]	69.84	12	9	34	144	8.39021e+07	8.87343e+07	191.464	63.6	32	78	190.913	65.34	29	66	577	64.1818	8.08936
P30101	Protein disulfide-isomerase A3 OS=Homo sapiens GN=PDIA3 PE=1 SV=4 - [PDIA3_HUMAN]	67.92	1	28	35	110	3.00995e+07	6.51113e+07	97.372	46.93	23	44	189.741	67.92	35	66	505	56.7468	6.354
P02647	Apolipoprotein A-I OS=Homo sapiens GN=APOA1 PE=1 SV=1 - [APOA1_HUMAN]	76.4	2	34	34	103	5.38811e+07	2.55853e+08	94.403	62.55	20	37	187.459	76.4	34	66	267	30.7589	5.75732
P40926	Malate dehydrogenase, mitochondrial OS=Homo sapiens GN=MDH2 PE=1 SV=3 - [MDHM_HUMAN]	70.12	2	27	27	111	7.00792e+07	1.42425e+08	139.439	65.98	21	46	209.578	69.82	26	65	338	35.4807	8.67529
P13639	Elongation factor 2 OS=Homo sapiens GN=EEF2 PE=1 SV=4 - [EF2_HUMAN]	59.32	4	39	39	103	1.71567e+07	3.92432e+07	82.831	31.7	23	38	159.649	58.28	38	65	858	95.277	6.82959
P0C0L4	Complement C4-A OS=Homo sapiens GN=C4A PE=1 SV=2 - [CO4A_HUMAN]	38.13	5	4	50	89	6.7569e+06	2.91113e+07	45.5296	16.06	20	24	174.832	37.67	49	65	1744	192.664	7.07861
Q5T2W1	Na(+)/H(+) exchange regulatory cofactor NHE-RF3 OS=Homo sapiens GN=PDZK1 PE=1 SV=2 - [NHRF3_HUMAN]	75.14	3	35	35	125	4.9454e+07	6.82714e+07	166.388	59.15	28	61	197.697	75.14	32	64	519	57.0939	5.5542
P21695	Glycerol-3-phosphate dehydrogenase [NAD(+)], cytoplasmic OS=Homo sapiens GN=GPD1 PE=1 SV=4 - [GPDA_HUMAN]	82.81	1	26	26	111	5.56012e+07	6.19141e+07	113.978	74.21	22	47	174.363	82.81	25	64	349	37.5433	6.17627
P68104	Elongation factor 1-alpha 1 OS=Homo sapiens GN=EEF1A1 PE=1 SV=1 - [EF1A1_HUMAN]	56.06	7	23	23	114	1.3199e+08	1.4791e+08	137.708	42.86	20	51	202.739	56.06	22	63	462	50.1091	9.01221
P05787	Keratin, type II cytoskeletal 8 OS=Homo sapiens GN=KRT8 PE=1 SV=7 - [K2C8_HUMAN]	70.6	30	21	36	110	3.34817e+07	7.18646e+07	112.687	43.69	25	47	168.168	68.53	34	63	483	53.6711	5.59229
P31930	Cytochrome b-c1 complex subunit 1, mitochondrial OS=Homo sapiens GN=UQCRC1 PE=1 SV=3 - [QCR1_HUMAN]	60.83	1	26	26	107	4.26658e+07	9.36821e+07	106.761	53.96	20	44	174.902	59.17	25	63	480	52.6124	6.3667
Q68CK6	Acyl-coenzyme A synthetase ACSM2B, mitochondrial OS=Homo sapiens GN=ACSM2B PE=1 SV=2 - [ACS2B_HUMAN]	71.58	9	7	35	154	1.03637e+08	8.07866e+07	239.487	67.59	33	92	175.246	67.59	31	62	577	64.2299	8.25049
	>sp|PPIA_HUMAN|	85.98	11	15	15	106	1.20607e+08	5.49901e+08	110.883	82.32	13	44	182.043	85.98	15	62	164	17.8698	7.81104
P28331	NADH-ubiquinone oxidoreductase 75 kDa subunit, mitochondrial OS=Homo sapiens GN=NDUFS1 PE=1 SV=3 - [NDUS1_HUMAN]	58.32	4	35	35	97	1.31195e+07	2.96793e+07	90.0198	39.2	22	36	139.922	55.85	33	61	727	79.4165	6.22705
A0A140TA44	Complement C4-A OS=Homo sapiens GN=C4A PE=1 SV=1 - [A0A140TA44_HUMAN]	37.22	3	1	47	83	6.7569e+06	2.91113e+07	40.2835	15.31	18	22	162.121	37.22	47	61	1698	187.543	7.12256
P55084	Trifunctional enzyme subunit beta, mitochondrial OS=Homo sapiens GN=HADHB PE=1 SV=3 - [ECHB_HUMAN]	64.98	6	30	30	117	9.66089e+07	7.46788e+07	132.588	63.5	27	58	143.208	64.56	28	59	474	51.2615	9.40771
P05166	Propionyl-CoA carboxylase beta chain, mitochondrial OS=Homo sapiens GN=PCCB PE=1 SV=3 - [PCCB_HUMAN]	68.46	14	30	30	105	3.27423e+07	5.36979e+07	107.66	56.4	24	46	162.502	64.94	27	59	539	58.1788	7.63525
A0A1B0GW44	Cathepsin D OS=Homo sapiens GN=CTSD PE=1 SV=1 - [A0A1B0GW44_HUMAN]	50.62	15	23	23	97	8.31453e+07	1.7945e+08	100.28	47.16	15	38	167.971	49.63	22	59	405	43.6602	6.53662
Q08257	Quinone oxidoreductase OS=Homo sapiens GN=CRYZ PE=1 SV=1 - [QOR_HUMAN]	81.46	3	27	27	104	6.69613e+07	1.76403e+08	133.847	66.57	22	46	172.273	81.46	27	58	329	35.1845	8.44092
P31040	Succinate dehydrogenase [ubiquinone] flavoprotein subunit, mitochondrial OS=Homo sapiens GN=SDHA PE=1 SV=2 - [SDHA_HUMAN]	55.12	4	27	27	102	3.55153e+07	8.9752e+07	112.265	43.98	22	44	163.85	52.71	25	58	664	72.6453	7.38623
P01857	Immunoglobulin heavy constant gamma 1 OS=Homo sapiens GN=IGHG1 PE=1 SV=1 - [IGHG1_HUMAN]	61.21	3	7	16	89	7.22128e+07	2.43264e+08	83.4267	44.85	11	31	178.636	61.21	16	58	330	36.0832	8.19189
Q01995	Transgelin OS=Homo sapiens GN=TAGLN PE=1 SV=4 - [TAGL_HUMAN]	83.08	3	21	21	79	1.79299e+07	1.18173e+08	46.9207	62.19	13	21	150.993	83.08	21	58	201	22.5964	8.83643
P07237	Protein disulfide-isomerase OS=Homo sapiens GN=P4HB PE=1 SV=3 - [PDIA1_HUMAN]	65.94	12	34	34	90	1.67507e+07	4.39063e+07	87.8506	48.03	23	33	158.472	64.57	33	57	508	57.0807	4.86865
Q02218	2-oxoglutarate dehydrogenase, mitochondrial OS=Homo sapiens GN=OGDH PE=1 SV=3 - [ODO1_HUMAN]	56.99	6	39	49	103	2.30665e+07	3.57269e+07	102.404	41.74	33	47	127.296	51.91	44	56	1023	115.861	6.85889
P49189	4-trimethylaminobutyraldehyde dehydrogenase OS=Homo sapiens GN=ALDH9A1 PE=1 SV=3 - [AL9A1_HUMAN]	61.54	1	29	29	100	2.89156e+07	5.31933e+07	96.0996	46.15	23	44	145.437	59.11	27	56	494	53.767	5.87158
Q9H0W9	Ester hydrolase C11orf54 OS=Homo sapiens GN=C11orf54 PE=1 SV=1 - [CK054_HUMAN]	60.32	10	23	23	85	5.76091e+07	1.60562e+08	75.6467	53.65	15	29	180.739	57.46	22	56	315	35.0946	6.69775
P00966	Argininosuccinate synthase OS=Homo sapiens GN=ASS1 PE=1 SV=2 - [ASSY_HUMAN]	61.17	3	28	28	100	1.19696e+08	1.75145e+08	118.511	46.12	22	45	157.531	61.17	27	55	412	46.501	8.01611
Q13423	NAD(P) transhydrogenase, mitochondrial OS=Homo sapiens GN=NNT PE=1 SV=3 - [NNTM_HUMAN]	38.4	4	7	37	96	5.43473e+07	8.37945e+07	81.4211	31.22	29	41	145.421	36.65	35	55	1086	113.823	8.08936
O75891	Cytosolic 10-formyltetrahydrofolate dehydrogenase OS=Homo sapiens GN=ALDH1L1 PE=1 SV=2 - [AL1L1_HUMAN]	68.18	8	44	44	87	1.32748e+07	5.4133e+07	86.281	42.35	25	32	143.182	64.3	39	55	902	98.7666	5.93506
P30039	Phenazine biosynthesis-like domain-containing protein OS=Homo sapiens GN=PBLD PE=1 SV=2 - [PBLD_HUMAN]	95.49	3	26	26	84	2.66891e+07	4.62227e+07	66.6539	65.28	15	29	157.44	95.49	26	55	288	31.7652	6.52197
P02042	Hemoglobin subunit delta OS=Homo sapiens GN=HBD PE=1 SV=2 - [HBD_HUMAN]	89.8	6	8	14	108	7.67698e+08	1.47942e+09	149.064	89.8	14	54	174.006	89.8	13	54	147	16.0453	8.04541
Q9UI17	Dimethylglycine dehydrogenase, mitochondrial OS=Homo sapiens GN=DMGDH PE=1 SV=2 - [M2GD_HUMAN]	63.51	4	41	41	107	2.6293e+07	3.49761e+07	125.331	45.27	30	53	143.71	60.85	38	54	866	96.7498	7.62061
E5RK69	Annexin OS=Homo sapiens GN=ANXA6 PE=1 SV=1 - [E5RK69_HUMAN]	68.26	2	2	33	94	1.81825e+07	4.51157e+07	92.9208	62.61	26	40	135.183	63.48	30	54	460	51.7442	6.04932
P21796	Voltage-dependent anion-selective channel protein 1 OS=Homo sapiens GN=VDAC1 PE=1 SV=2 - [VDAC1_HUMAN]	75.27	2	21	22	86	5.9513e+07	1.11114e+08	96.9702	69.96	18	32	167.601	70.67	20	54	283	30.7536	8.54346
P55072	Transitional endoplasmic reticulum ATPase OS=Homo sapiens GN=VCP PE=1 SV=4 - [TERA_HUMAN]	60.55	6	39	39	85	1.14786e+07	4.56205e+07	64.2027	35.98	23	31	143.705	57.69	36	54	806	89.2657	5.26221
P02790	Hemopexin OS=Homo sapiens GN=HPX PE=1 SV=2 - [HEMO_HUMAN]	58.01	2	24	24	77	3.27847e+07	2.83069e+08	50.8557	41.99	15	23	159.861	58.01	24	54	462	51.6433	7.02002
P29401	Transketolase OS=Homo sapiens GN=TKT PE=1 SV=3 - [TKT_HUMAN]	61.8	4	29	29	75	2.56658e+07	8.84991e+07	42.9548	32.1	14	21	154.39	61.8	29	54	623	67.8347	7.66455
P21399	Cytoplasmic aconitate hydratase OS=Homo sapiens GN=ACO1 PE=1 SV=3 - [ACOC_HUMAN]	54.11	1	39	39	95	1.88723e+07	4.87456e+07	90.1952	37.23	25	42	126.24	51.18	34	53	889	98.3366	6.68311
P22314	Ubiquitin-like modifier-activating enzyme 1 OS=Homo sapiens GN=UBA1 PE=1 SV=3 - [UBA1_HUMAN]	49.05	7	40	40	90	1.58419e+07	4.07615e+07	92.4654	30.06	25	37	151.854	46.03	37	53	1058	117.774	5.75732
P00738	Haptoglobin OS=Homo sapiens GN=HP PE=1 SV=1 - [HPT_HUMAN]	62.07	12	15	26	73	1.49623e+07	1.56369e+08	44.1814	42.61	14	20	146.331	54.43	25	53	406	45.1766	6.58057
P09467	Fructose-1,6-bisphosphatase 1 OS=Homo sapiens GN=FBP1 PE=1 SV=5 - [F16P1_HUMAN]	57.4	2	21	22	99	5.86073e+07	9.09863e+07	129.449	53.55	18	47	162.202	53.55	20	52	338	36.8188	6.99072
P09525	Annexin A4 OS=Homo sapiens GN=ANXA4 PE=1 SV=4 - [ANXA4_HUMAN]	71.79	3	28	29	83	2.12031e+07	7.91685e+07	65.4795	53.61	17	31	141.426	71.79	27	52	319	35.8601	6.12549
Q99497	Protein DJ-1 OS=Homo sapiens GN=PARK7 PE=1 SV=2 - [PARK7_HUMAN]	93.65	3	20	20	74	4.26842e+07	1.03675e+08	47.8442	69.31	11	22	127.07	93.65	20	52	189	19.8785	6.78564
Q13011	Delta(3,5)-Delta(2,4)-dienoyl-CoA isomerase, mitochondrial OS=Homo sapiens GN=ECH1 PE=1 SV=2 - [ECH1_HUMAN]	67.68	5	19	19	99	1.20228e+08	1.26578e+08	109.174	57.01	16	48	129.377	65.85	18	51	328	35.7934	8.00146
P14550	Alcohol dehydrogenase [NADP(+)] OS=Homo sapiens GN=AKR1A1 PE=1 SV=3 - [AK1A1_HUMAN]	74.15	6	24	24	94	5.43754e+07	1.13564e+08	112.298	68	20	43	139.107	74.15	24	51	325	36.5499	6.78564
Q6S8J3	POTE ankyrin domain family member E OS=Homo sapiens GN=POTEE PE=2 SV=3 - [POTEE_HUMAN]	10.88	6	1	9	81	1.94238e+08	8.82009e+08	96.2325	8.09	8	30	163.004	10.88	9	51	1075	121.286	6.20166
P00325	Alcohol dehydrogenase 1B OS=Homo sapiens GN=ADH1B PE=1 SV=2 - [ADH1B_HUMAN]	72.27	7	13	24	76	2.46301e+07	9.2003e+07	64.5714	54.4	13	25	150.668	72.27	24	51	375	39.8286	8.29443
Q14204	Cytoplasmic dynein 1 heavy chain 1 OS=Homo sapiens GN=DYNC1H1 PE=1 SV=5 - [DYHC1_HUMAN]	15.13	2	49	49	74	3.83504e+06	1.50756e+07	37.2331	5.75	21	23	111.811	14.18	45	51	4646	532.072	6.40479
Q08426	Peroxisomal bifunctional enzyme OS=Homo sapiens GN=EHHADH PE=1 SV=3 - [ECHP_HUMAN]	66.67	2	40	40	103	1.99043e+07	2.41738e+07	128.397	55.19	33	53	122.211	59.2	33	50	723	79.4447	9.14404
P49448	Glutamate dehydrogenase 2, mitochondrial OS=Homo sapiens GN=GLUD2 PE=1 SV=2 - [DHE4_HUMAN]	40.5	1	1	20	100	2.2444e+08	2.38579e+08	135.864	38.89	19	50	154.723	40.5	20	50	558	61.3954	8.45557
P38606	V-type proton ATPase catalytic subunit A OS=Homo sapiens GN=ATP6V1A PE=1 SV=2 - [VATA_HUMAN]	67.42	3	34	34	98	2.67443e+07	4.20677e+07	133.048	57.54	28	48	150.301	64.83	31	50	617	68.2605	5.51611
P34896	Serine hydroxymethyltransferase, cytosolic OS=Homo sapiens GN=SHMT1 PE=1 SV=1 - [GLYC_HUMAN]	68.32	5	27	28	89	5.61589e+07	7.87001e+07	106.237	49.69	22	39	148.019	66.25	27	50	483	53.049	7.7085
Q13813	Spectrin alpha chain, non-erythrocytic 1 OS=Homo sapiens GN=SPTAN1 PE=1 SV=3 - [SPTN1_HUMAN]	26.94	4	2	51	83	8.87217e+06	1.69982e+07	69.644	14.04	26	33	130.259	23.02	43	50	2472	284.364	5.35107
A0A0D9SF54	Spectrin alpha chain, non-erythrocytic 1 OS=Homo sapiens GN=SPTAN1 PE=1 SV=1 - [A0A0D9SF54_HUMAN]	27.15	4	2	51	80	8.44912e+06	1.61517e+07	65.2647	12.7	24	30	126.693	23.2	43	50	2457	282.662	5.33838
P49748	Very long-chain specific acyl-CoA dehydrogenase, mitochondrial OS=Homo sapiens GN=ACADVL PE=1 SV=1 - [ACADV_HUMAN]	64.58	9	37	37	114	5.50031e+07	3.89966e+07	175.886	63.36	36	65	140.692	59.08	30	49	655	70.3454	8.74854
Q3LXA3	Triokinase/FMN cyclase OS=Homo sapiens GN=TKFC PE=1 SV=2 - [TKFC_HUMAN]	64.52	5	30	30	97	2.50071e+07	4.11116e+07	126.039	57.39	25	48	135.778	61.57	28	49	575	58.91	7.48877
	>sp|ANXA5_HUMAN|	63.64	6	21	22	82	4.24126e+07	1.22897e+08	65.4319	56.11	18	33	126.703	63.64	21	49	319	35.7834	5.04639
P08473	Neprilysin OS=Homo sapiens GN=MME PE=1 SV=2 - [NEP_HUMAN]	48	7	33	33	81	1.20076e+07	3.92421e+07	65.7942	33.6	21	32	133.465	46.53	31	49	750	85.4599	5.73193
P67936	Tropomyosin alpha-4 chain OS=Homo sapiens GN=TPM4 PE=1 SV=3 - [TPM4_HUMAN]	78.23	9	14	27	74	2.80934e+07	1.18366e+08	57.2178	54.84	16	25	127.273	72.58	23	49	248	28.5045	4.69092
P35241	Radixin OS=Homo sapiens GN=RDX PE=1 SV=1 - [RADI_HUMAN]	45.28	4	14	29	73	3.18499e+07	1.1162e+08	41.8905	25.9	15	24	123.335	43.91	28	49	583	68.5214	6.3667
Q96I99	Succinate--CoA ligase [GDP-forming] subunit beta, mitochondrial OS=Homo sapiens GN=SUCLG2 PE=1 SV=2 - [SUCB2_HUMAN]	69.68	3	31	31	95	3.412e+07	6.01213e+07	120.339	54.63	26	47	132.242	68.75	26	48	432	46.4814	6.39209
B9A067	MICOS complex subunit MIC60 OS=Homo sapiens GN=IMMT PE=1 SV=2 - [B9A067_HUMAN]	60.2	6	37	37	77	1.50947e+07	3.56351e+07	63.5634	36.57	21	29	121.536	52.6	31	48	711	78.925	7.06396
P22695	Cytochrome b-c1 complex subunit 2, mitochondrial OS=Homo sapiens GN=UQCRC2 PE=1 SV=3 - [QCR2_HUMAN]	48.12	7	22	22	78	3.81655e+07	7.69911e+07	83.8531	41.28	14	31	135.311	48.12	21	47	453	48.4129	8.63135
P48047	ATP synthase subunit O, mitochondrial OS=Homo sapiens GN=ATP5O PE=1 SV=1 - [ATPO_HUMAN]	71.36	4	16	16	86	4.94757e+07	8.55034e+07	103.71	71.36	14	40	121.534	68.54	15	46	213	23.2627	9.96436
E9PCX7	NAD(P) transhydrogenase, mitochondrial OS=Homo sapiens GN=NNT PE=1 SV=1 - [E9PCX7_HUMAN]	37.59	3	1	31	78	5.28811e+07	7.81749e+07	62.9589	29.42	24	33	120.39	34.03	28	45	955	99.665	7.02002
	>sp|GSTP1_HUMAN|	72.73	5	16	16	74	8.90916e+07	2.97026e+08	92.1078	65.55	12	29	165.38	72.73	16	45	209	23.21	5.64307
P37802	Transgelin-2 OS=Homo sapiens GN=TAGLN2 PE=1 SV=3 - [TAGL2_HUMAN]	80.9	4	16	16	71	1.92933e+07	5.60704e+07	66.0165	61.81	11	26	122.833	80.9	16	45	199	22.3772	8.25049
P09622	Dihydrolipoyl dehydrogenase, mitochondrial OS=Homo sapiens GN=DLD PE=1 SV=2 - [DLDH_HUMAN]	59.14	4	26	26	70	2.14325e+07	6.37654e+07	70.1791	30.06	14	25	128.234	59.14	26	45	509	54.143	7.85498
P13804	Electron transfer flavoprotein subunit alpha, mitochondrial OS=Homo sapiens GN=ETFA PE=1 SV=1 - [ETFA_HUMAN]	75.68	9	25	25	89	7.73419e+07	6.78421e+07	117.182	65.17	20	45	128.137	75.38	24	44	333	35.0576	8.38232
Q16836	Hydroxyacyl-coenzyme A dehydrogenase, mitochondrial OS=Homo sapiens GN=HADH PE=1 SV=3 - [HCDH_HUMAN]	81.53	3	23	23	70	4.06626e+07	8.26323e+07	63.5216	45.22	13	26	122.804	78.98	21	44	314	34.2719	8.85107
Q14697	Neutral alpha-glucosidase AB OS=Homo sapiens GN=GANAB PE=1 SV=3 - [GANAB_HUMAN]	39.09	4	26	26	64	7.22387e+06	2.75163e+07	36.4903	19.28	14	20	102.032	39.09	26	44	944	106.807	6.13818
P00450	Ceruloplasmin OS=Homo sapiens GN=CP PE=1 SV=1 - [CERU_HUMAN]	41.78	5	28	28	55	7.43056e+06	3.3243e+07	24.5016	15.02	10	11	99.778	41.78	28	44	1065	122.128	5.71924
O75874	Isocitrate dehydrogenase [NADP] cytoplasmic OS=Homo sapiens GN=IDH1 PE=1 SV=2 - [IDHC_HUMAN]	62.08	4	23	24	93	3.83211e+07	3.70541e+07	117.078	55.31	22	50	97.3368	57.97	21	43	414	46.6295	7.00537
Q9HCC0	Methylcrotonoyl-CoA carboxylase beta chain, mitochondrial OS=Homo sapiens GN=MCCC2 PE=1 SV=1 - [MCCB_HUMAN]	56.84	5	28	28	80	1.13845e+07	2.05012e+07	80.1228	45.12	23	37	115.091	48.85	25	43	563	61.2944	7.6792
P04075	Fructose-bisphosphate aldolase A OS=Homo sapiens GN=ALDOA PE=1 SV=2 - [ALDOA_HUMAN]	71.98	11	24	24	70	2.12034e+07	7.1162e+07	69.9878	58.24	15	27	129.719	71.98	24	43	364	39.3953	8.08936
P07954	Fumarate hydratase, mitochondrial OS=Homo sapiens GN=FH PE=1 SV=3 - [FUMH_HUMAN]	62.94	1	22	22	69	2.46586e+07	9.38895e+07	72.5195	45.1	15	26	131.524	62.94	21	43	510	54.6022	8.76318
G3V0I5	NADH dehydrogenase (Ubiquinone) flavoprotein 1, 51kDa, isoform CRA_c OS=Homo sapiens GN=NDUFV1 PE=1 SV=1 - [G3V0I5_HUMAN]	69.15	12	25	25	59	6.22796e+06	3.84753e+07	31.5881	43.11	13	16	120.005	69.15	25	43	457	50.0224	8.20654
P21397	Amine oxidase [flavin-containing] A OS=Homo sapiens GN=MAOA PE=1 SV=1 - [AOFA_HUMAN]	50.47	1	18	23	55	1.00037e+07	3.30012e+07	19.907	13.47	8	12	102.488	50.47	23	43	527	59.6435	7.85498
P46940	Ras GTPase-activating-like protein IQGAP1 OS=Homo sapiens GN=IQGAP1 PE=1 SV=1 - [IQGA1_HUMAN]	26.8	7	34	36	53	3.06412e+06	1.78265e+07	13.897	7.36	10	10	93.0784	25.89	35	43	1657	189.134	6.48096
P62258	14-3-3 protein epsilon OS=Homo sapiens GN=YWHAE PE=1 SV=1 - [1433E_HUMAN]	58.82	6	17	20	82	6.16074e+07	1.35511e+08	91.8964	45.1	14	40	112.366	58.82	18	42	255	29.1554	4.7417
Q6IB77	Glycine N-acyltransferase OS=Homo sapiens GN=GLYAT PE=1 SV=3 - [GLYAT_HUMAN]	63.51	1	15	15	80	6.49506e+07	1.34502e+08	101.498	47.97	11	38	120.793	63.18	14	42	296	33.902	8.1626
P22626	Heterogeneous nuclear ribonucleoproteins A2/B1 OS=Homo sapiens GN=HNRNPA2B1 PE=1 SV=2 - [ROA2_HUMAN]	72.24	2	22	24	79	2.9483e+07	4.12202e+07	82.5649	59.21	19	37	97.0173	69.69	23	42	353	37.4067	8.95361
Q16698	2,4-dienoyl-CoA reductase, mitochondrial OS=Homo sapiens GN=DECR1 PE=1 SV=1 - [DECR_HUMAN]	64.48	6	21	21	75	4.9408e+07	9.57359e+07	74.4985	50.45	16	33	122.292	64.48	21	42	335	36.0448	9.27588
P21281	V-type proton ATPase subunit B, brain isoform OS=Homo sapiens GN=ATP6V1B2 PE=1 SV=3 - [VATB2_HUMAN]	62.62	4	17	24	73	2.18167e+07	3.25582e+07	75.2782	50.29	18	31	122.265	62.62	24	42	511	56.4649	5.80811
P28838	Cytosol aminopeptidase OS=Homo sapiens GN=LAP3 PE=1 SV=3 - [AMPL_HUMAN]	53.95	3	25	25	73	1.56818e+07	2.59769e+07	77.8472	47.21	19	31	101.312	53.56	24	42	519	56.1308	7.92822
P30048	Thioredoxin-dependent peroxide reductase, mitochondrial OS=Homo sapiens GN=PRDX3 PE=1 SV=3 - [PRDX3_HUMAN]	57.81	1	15	15	71	7.42118e+07	1.87402e+08	78.7433	46.09	12	29	137.238	57.81	15	42	256	27.6752	7.78174
Q5TCU3	Tropomyosin beta chain OS=Homo sapiens GN=TPM2 PE=1 SV=1 - [Q5TCU3_HUMAN]	56.34	8	6	23	63	2.80934e+07	1.18366e+08	41.4786	36.27	13	21	112.255	51.41	21	42	284	32.7946	4.67822
P01859	Immunoglobulin heavy constant gamma 2 OS=Homo sapiens GN=IGHG2 PE=1 SV=2 - [IGHG2_HUMAN]	42.02	1	5	13	53	4.40534e+07	1.4422e+08	24.8784	22.39	6	11	110.14	42.02	13	42	326	35.8778	7.59131
P02671	Fibrinogen alpha chain OS=Homo sapiens GN=FGA PE=1 SV=2 - [FIBA_HUMAN]	31.64	2	24	24	73	1.3239e+07	3.41505e+07	61.9667	30.02	21	32	95.8008	29.1	20	41	866	94.9144	6.01123
P05141	ADP/ATP translocase 2 OS=Homo sapiens GN=SLC25A5 PE=1 SV=7 - [ADT2_HUMAN]	46.98	2	7	21	70	1.00844e+08	1.53085e+08	72.8714	43.96	17	29	106.088	46.98	20	41	298	32.8312	9.68604
Q16555	Dihydropyrimidinase-related protein 2 OS=Homo sapiens GN=DPYSL2 PE=1 SV=1 - [DPYL2_HUMAN]	64.51	3	21	24	72	1.73319e+07	4.45294e+07	68.5982	49.65	19	32	102.148	62.76	22	40	572	62.2546	6.37939
P27797	Calreticulin OS=Homo sapiens GN=CALR PE=1 SV=1 - [CALR_HUMAN]	53.72	3	19	19	66	2.52046e+07	7.65778e+07	67.4716	40.77	13	26	120.499	53.72	19	40	417	48.1118	4.43701
Q562R1	Beta-actin-like protein 2 OS=Homo sapiens GN=ACTBL2 PE=1 SV=2 - [ACTBL_HUMAN]	18.35	1	1	7	62	1.22759e+08	7.79523e+08	49.5842	10.9	4	22	93.4426	18.35	7	40	376	41.976	5.59229
A0A0A0MRV0	Ribosome-binding protein 1 OS=Homo sapiens GN=RRBP1 PE=1 SV=1 - [A0A0A0MRV0_HUMAN]	27.8	12	33	33	59	2.86907e+06	1.11605e+07	33.8423	14.61	17	19	94.7052	26.88	32	40	1410	152.365	8.60205
P01876	Immunoglobulin heavy constant alpha 1 OS=Homo sapiens GN=IGHA1 PE=1 SV=2 - [IGHA1_HUMAN]	54.39	1	7	15	52	1.45108e+07	1.50886e+08	26.8467	25.78	7	12	112.975	52.41	14	40	353	37.6306	6.50732
A0A0C4DFU2	Superoxide dismutase OS=Homo sapiens GN=SOD2 PE=1 SV=1 - [A0A0C4DFU2_HUMAN]	52.7	10	15	15	51	1.60616e+07	1.11239e+08	26.4849	36.94	7	11	128.07	52.7	15	40	222	24.7346	8.25049
Q14764	Major vault protein OS=Homo sapiens GN=MVP PE=1 SV=4 - [MVP_HUMAN]	45.24	11	31	31	51	4.11394e+06	1.73782e+07	24.3835	13.21	11	11	98.0488	44.23	29	40	893	99.2659	5.47803
	>sp|CATA_HUMAN|	58.75	2	30	30	83	7.81167e+07	7.05964e+07	120.393	44.11	26	44	118.867	54.18	26	39	526	59.5877	7.38623
P45954	Short/branched chain specific acyl-CoA dehydrogenase, mitochondrial OS=Homo sapiens GN=ACADSB PE=1 SV=1 - [ACDSB_HUMAN]	54.86	1	21	21	67	2.25022e+07	4.3119e+07	64.7507	45.83	16	28	104.764	54.86	21	39	432	47.4553	6.99072
P61978	Heterogeneous nuclear ribonucleoprotein K OS=Homo sapiens GN=HNRNPK PE=1 SV=1 - [HNRPK_HUMAN]	46.22	3	5	22	64	1.47102e+07	4.93154e+07	53.9405	34.99	15	25	102.751	46.22	22	39	463	50.9444	5.5415
P31937	3-hydroxyisobutyrate dehydrogenase, mitochondrial OS=Homo sapiens GN=HIBADH PE=1 SV=2 - [3HIDH_HUMAN]	48.51	2	16	16	59	2.39908e+07	5.86892e+07	56.7682	47.32	12	20	126.825	48.51	16	39	336	35.3058	8.1333
P05783	Keratin, type I cytoskeletal 18 OS=Homo sapiens GN=KRT18 PE=1 SV=2 - [K1C18_HUMAN]	59.3	16	24	26	53	1.51931e+07	5.51261e+07	21.832	31.16	12	14	89.2903	59.3	25	39	430	48.0285	5.45264
P09110	3-ketoacyl-CoA thiolase, peroxisomal OS=Homo sapiens GN=ACAA1 PE=1 SV=2 - [THIK_HUMAN]	65.8	7	22	22	87	5.24807e+07	3.75611e+07	147.147	65.8	22	49	101.953	60.14	16	38	424	44.2639	8.44092
P38117	Electron transfer flavoprotein subunit beta OS=Homo sapiens GN=ETFB PE=1 SV=3 - [ETFB_HUMAN]	64.71	2	19	19	79	7.40149e+07	7.40078e+07	117.364	63.53	18	41	108.62	63.53	18	38	255	27.8262	8.104
P32119	Peroxiredoxin-2 OS=Homo sapiens GN=PRDX2 PE=1 SV=5 - [PRDX2_HUMAN]	66.67	2	16	17	64	1.08868e+08	2.6491e+08	69.1448	34.34	11	26	105.139	66.67	16	38	198	21.8782	5.97314
P12236	ADP/ATP translocase 3 OS=Homo sapiens GN=SLC25A6 PE=1 SV=4 - [ADT3_HUMAN]	57.72	2	4	22	62	8.64202e+07	1.41195e+08	53.4352	45.64	16	24	100.87	57.72	20	38	298	32.8452	9.74463
O75083	WD repeat-containing protein 1 OS=Homo sapiens GN=WDR1 PE=1 SV=4 - [WDR1_HUMAN]	61.22	2	24	24	60	1.39005e+07	3.21214e+07	38.9658	36.96	15	22	92.2212	61.22	22	38	606	66.1519	6.65381
P01834	Immunoglobulin kappa constant OS=Homo sapiens GN=IGKC PE=1 SV=2 - [IGKC_HUMAN]	90.65	1	10	10	59	2.28696e+07	2.49573e+08	64.7485	81.31	6	21	139.041	90.65	10	38	107	11.7578	6.52197
Q01518	Adenylyl cyclase-associated protein 1 OS=Homo sapiens GN=CAP1 PE=1 SV=5 - [CAP1_HUMAN]	58.74	16	25	25	57	1.05255e+07	4.27086e+07	37.3132	29.68	12	19	89.9269	57.26	24	38	475	51.8687	8.06006
Q9Y2S2	Lambda-crystallin homolog OS=Homo sapiens GN=CRYL1 PE=1 SV=3 - [CRYL1_HUMAN]	66.77	2	20	20	76	3.98998e+07	4.7399e+07	91.438	59.87	18	39	92.7206	66.77	19	37	319	35.3961	6.17627
P61604	10 kDa heat shock protein, mitochondrial OS=Homo sapiens GN=HSPE1 PE=1 SV=2 - [CH10_HUMAN]	84.31	4	16	16	63	1.62606e+08	1.86144e+08	63.3796	81.37	11	26	99.904	84.31	16	37	102	10.9249	8.92432
Q00796	Sorbitol dehydrogenase OS=Homo sapiens GN=SORD PE=1 SV=4 - [DHSO_HUMAN]	63.31	3	19	19	62	1.59784e+07	4.92081e+07	50.9373	39.78	13	25	107.081	63.31	18	37	357	38.2998	7.97217
O94760	N(G),N(G)-dimethylarginine dimethylaminohydrolase 1 OS=Homo sapiens GN=DDAH1 PE=1 SV=3 - [DDAH1_HUMAN]	64.91	2	16	17	59	1.10827e+07	3.80609e+07	46.5119	60.7	15	22	100.601	64.91	16	37	285	31.1019	5.80811
P00338	L-lactate dehydrogenase A chain OS=Homo sapiens GN=LDHA PE=1 SV=2 - [LDHA_HUMAN]	76.51	19	20	22	58	7.78576e+07	1.91042e+08	44.03	41.57	14	21	95.6759	76.51	20	37	332	36.6654	8.26514
P00491	Purine nucleoside phosphorylase OS=Homo sapiens GN=PNP PE=1 SV=2 - [PNPH_HUMAN]	77.51	4	15	15	57	9.98365e+06	3.81284e+07	32.0866	49.83	11	20	96.1011	73.7	14	37	289	32.0972	6.94678
P23526	Adenosylhomocysteinase OS=Homo sapiens GN=AHCY PE=1 SV=4 - [SAHH_HUMAN]	43.52	1	20	20	57	2.13081e+07	5.37942e+07	50.922	29.17	13	20	97.1642	43.52	18	37	432	47.6852	6.34131
P19338	Nucleolin OS=Homo sapiens GN=NCL PE=1 SV=3 - [NUCL_HUMAN]	38.87	2	28	28	55	1.21357e+07	4.12087e+07	33.3527	22.25	13	18	91.2164	38.87	28	37	710	76.5684	4.70361
G3V1A4	Cofilin 1 (Non-muscle), isoform CRA_a OS=Homo sapiens GN=CFL1 PE=1 SV=1 - [G3V1A4_HUMAN]	84.56	7	10	17	54	1.55236e+07	1.21412e+08	48.8761	51.01	9	17	125.459	84.56	17	37	149	16.8008	8.35303
Q6ZN40	Tropomyosin 1 (Alpha), isoform CRA_f OS=Homo sapiens GN=TPM1 PE=1 SV=1 - [Q6ZN40_HUMAN]	56.75	6	4	25	52	2.80934e+07	1.18366e+08	28.3059	28.22	11	15	87.5834	52.45	23	37	326	37.4301	4.71631
O75936	Gamma-butyrobetaine dioxygenase OS=Homo sapiens GN=BBOX1 PE=1 SV=1 - [BODG_HUMAN]	52.71	2	19	19	65	2.79717e+07	4.64206e+07	59.9133	42.64	15	29	96.1718	52.71	19	36	387	44.6865	6.7417
P63104	14-3-3 protein zeta/delta OS=Homo sapiens GN=YWHAZ PE=1 SV=1 - [1433Z_HUMAN]	64.9	11	14	19	64	7.25433e+07	1.58573e+08	55.0224	51.84	12	28	85.0805	62.04	17	36	245	27.7277	4.79248
P02679	Fibrinogen gamma chain OS=Homo sapiens GN=FGG PE=1 SV=3 - [FIBG_HUMAN]	47.02	5	20	20	63	3.73912e+07	1.13099e+08	65.7295	41.06	14	27	105.297	47.02	19	36	453	51.4789	5.61768
P21912	Succinate dehydrogenase [ubiquinone] iron-sulfur subunit, mitochondrial OS=Homo sapiens GN=SDHB PE=1 SV=3 - [SDHB_HUMAN]	53.93	3	18	18	60	2.30801e+07	6.12945e+07	47.7489	53.57	14	24	81.6	53.93	17	36	280	31.6088	8.76318
P07858	Cathepsin B OS=Homo sapiens GN=CTSB PE=1 SV=3 - [CATB_HUMAN]	48.97	11	13	13	53	3.52509e+07	1.08061e+08	50.7027	24.78	8	17	110.555	48.97	13	36	339	37.7968	6.30322
P05556	Integrin beta-1 OS=Homo sapiens GN=ITGB1 PE=1 SV=2 - [ITB1_HUMAN]	32.21	11	21	21	53	7.1048e+06	4.51128e+07	35.413	18.67	14	17	84.175	32.21	21	36	798	88.357	5.38916
P08559	Pyruvate dehydrogenase E1 component subunit alpha, somatic form, mitochondrial OS=Homo sapiens GN=PDHA1 PE=1 SV=3 - [ODPA_HUMAN]	50.26	7	19	19	52	1.34687e+07	3.55376e+07	39.4045	29.23	10	16	89.7931	50.26	19	36	390	43.2676	8.06006
P08603	Complement factor H OS=Homo sapiens GN=CFH PE=1 SV=4 - [CFAH_HUMAN]	35.74	6	29	30	50	4.40908e+06	1.79513e+07	21.4007	13.73	12	14	72.7318	32.49	27	36	1231	139.005	6.60986
Q6NVY1	3-hydroxyisobutyryl-CoA hydrolase, mitochondrial OS=Homo sapiens GN=HIBCH PE=1 SV=2 - [HIBCH_HUMAN]	54.15	7	11	21	66	2.96484e+07	3.0208e+07	78.8483	42.75	17	31	90.8365	48.96	17	35	386	43.4544	8.19189
P27338	Amine oxidase [flavin-containing] B OS=Homo sapiens GN=MAOB PE=1 SV=3 - [AOFB_HUMAN]	42.88	1	15	20	61	1.71876e+07	3.50491e+07	63.2793	34.81	16	26	94.6776	40.77	19	35	520	58.7252	7.50342
O14745	Na(+)/H(+) exchange regulatory cofactor NHE-RF1 OS=Homo sapiens GN=SLC9A3R1 PE=1 SV=4 - [NHRF1_HUMAN]	63.97	3	21	21	58	4.5627e+07	1.10139e+08	58.5341	46.93	12	23	91.5093	61.45	20	35	358	38.8446	5.77002
P27824	Calnexin OS=Homo sapiens GN=CANX PE=1 SV=2 - [CALX_HUMAN]	39.86	12	21	21	55	9.34325e+06	3.80336e+07	47.6676	27.53	13	20	95.3078	36.82	19	35	592	67.5259	4.60205
Q5HYB6	Epididymis luminal protein 189 OS=Homo sapiens GN=DKFZp686J1372 PE=1 SV=1 - [Q5HYB6_HUMAN]	75	3	16	25	54	2.3949e+07	1.05915e+08	36.5345	58.19	15	19	81.7582	68.1	23	35	232	27.1588	4.7417
P13489	Ribonuclease inhibitor OS=Homo sapiens GN=RNH1 PE=1 SV=2 - [RINI_HUMAN]	62.69	10	21	21	53	1.34022e+07	4.13161e+07	44.9221	36.01	12	18	102.951	62.69	21	35	461	49.9411	4.81787
E9PGZ1	Caldesmon OS=Homo sapiens GN=CALD1 PE=1 SV=1 - [E9PGZ1_HUMAN]	51.49	7	28	28	53	1.24837e+07	3.26601e+07	43.0507	32.65	13	18	80.438	44.4	25	35	536	61.6685	6.11279
P50395	Rab GDP dissociation inhibitor beta OS=Homo sapiens GN=GDI2 PE=1 SV=2 - [GDIB_HUMAN]	78.88	7	18	27	52	1.30183e+07	4.27769e+07	38.2849	43.15	15	17	92.1439	77.08	25	35	445	50.6309	6.46826
P51659	Peroxisomal multifunctional enzyme type 2 OS=Homo sapiens GN=HSD17B4 PE=1 SV=3 - [DHB4_HUMAN]	44.7	6	25	25	61	1.12107e+07	1.7318e+07	63.2598	33.83	19	27	78.3005	44.57	23	34	736	79.6363	8.83643
	>sp|CAH2_HUMAN|	76.45	5	19	19	60	1.01822e+08	1.23734e+08	86.001	74.9	15	26	113.973	76.45	19	34	259	29.0969	7.40088
F8W6I7	Heterogeneous nuclear ribonucleoprotein A1 OS=Homo sapiens GN=HNRNPA1 PE=1 SV=2 - [F8W6I7_HUMAN]	62.54	7	8	20	60	6.45229e+06	2.99182e+07	49.4441	62.21	19	26	88.8482	62.54	19	34	307	33.1348	9.12939
Q14117	Dihydropyrimidinase OS=Homo sapiens GN=DPYS PE=1 SV=1 - [DPYS_HUMAN]	57.23	2	20	21	58	9.10576e+06	2.34138e+07	49.0467	42.77	15	24	81.1763	51.45	18	34	519	56.5937	7.26904
P35232	Prohibitin OS=Homo sapiens GN=PHB PE=1 SV=1 - [PHB_HUMAN]	83.09	6	20	20	56	2.26823e+07	5.5196e+07	51.6056	58.46	12	22	103.738	83.09	20	34	272	29.7859	5.75732
Q13228	Selenium-binding protein 1 OS=Homo sapiens GN=SELENBP1 PE=1 SV=2 - [SBP1_HUMAN]	60.59	6	23	23	52	1.11341e+07	4.35121e+07	45.4253	38.35	14	18	93.9149	60.59	23	34	472	52.3576	6.3667
P18669	Phosphoglycerate mutase 1 OS=Homo sapiens GN=PGAM1 PE=1 SV=2 - [PGAM1_HUMAN]	67.32	3	16	16	51	1.97191e+07	8.9575e+07	47.0823	51.57	10	17	88.2178	67.32	15	34	254	28.7858	7.18115
P21810	Biglycan OS=Homo sapiens GN=BGN PE=1 SV=2 - [PGS1_HUMAN]	45.65	2	15	16	51	1.52648e+07	5.52763e+07	42.9454	26.63	9	17	107.051	43.21	15	34	368	41.6275	7.51807
P34932	Heat shock 70 kDa protein 4 OS=Homo sapiens GN=HSPA4 PE=1 SV=4 - [HSP74_HUMAN]	41.67	3	27	28	50	5.78795e+06	1.42166e+07	26.5497	22.14	14	16	72.3345	41.67	28	34	840	94.2712	5.18604
A0A0A0MS51	Gelsolin OS=Homo sapiens GN=GSN PE=1 SV=1 - [A0A0A0MS51_HUMAN]	45.59	7	19	19	42	1.03627e+07	5.67922e+07	15.0267	14.84	8	8	89.9805	45.59	19	34	748	82.4743	5.63037
P30086	Phosphatidylethanolamine-binding protein 1 OS=Homo sapiens GN=PEBP1 PE=1 SV=3 - [PEBP1_HUMAN]	88.24	1	17	17	65	2.04942e+08	4.76919e+08	94.4184	75.94	14	32	106.612	88.24	15	33	187	21.0437	7.53271
P40925	Malate dehydrogenase, cytoplasmic OS=Homo sapiens GN=MDH1 PE=1 SV=4 - [MDHC_HUMAN]	50.6	6	18	18	63	8.20837e+07	1.78042e+08	84.6954	50.6	16	30	102.357	50.6	18	33	334	36.403	7.35693
P54652	Heat shock-related 70 kDa protein 2 OS=Homo sapiens GN=HSPA2 PE=1 SV=1 - [HSP72_HUMAN]	33.96	1	8	21	56	8.72237e+07	2.59639e+08	54.3001	17.84	12	23	95.5876	33.96	21	33	639	69.9779	5.74463
Q99714	3-hydroxyacyl-CoA dehydrogenase type-2 OS=Homo sapiens GN=HSD17B10 PE=1 SV=3 - [HCD2_HUMAN]	85.06	2	15	15	55	1.53997e+07	4.53037e+07	62.2379	65.13	12	22	104.407	85.06	15	33	261	26.9061	7.78174
Q5T6W2	Heterogeneous nuclear ribonucleoprotein K (Fragment) OS=Homo sapiens GN=HNRNPK PE=1 SV=1 - [Q5T6W2_HUMAN]	46.17	2	1	18	55	1.47102e+07	4.03451e+07	45.5006	31.66	12	22	77.9822	46.17	18	33	379	41.7807	5.59229
Q9NQR4	Omega-amidase NIT2 OS=Homo sapiens GN=NIT2 PE=1 SV=1 - [NIT2_HUMAN]	86.59	3	22	22	52	1.92292e+07	6.21713e+07	42.7546	58.33	14	19	80.1219	86.59	22	33	276	30.5886	7.21045
P09417	Dihydropteridine reductase OS=Homo sapiens GN=QDPR PE=1 SV=2 - [DHPR_HUMAN]	63.93	4	14	14	52	1.66025e+07	4.23591e+07	48.8811	50.82	10	19	88.0539	63.93	14	33	244	25.773	7.37158
O75309	Cadherin-16 OS=Homo sapiens GN=CDH16 PE=2 SV=1 - [CAD16_HUMAN]	38.36	6	19	19	50	6.54335e+06	3.92179e+07	31.2011	24.61	14	17	88.262	38.36	19	33	829	89.8666	4.95752
P36957	Dihydrolipoyllysine-residue succinyltransferase component of 2-oxoglutarate dehydrogenase complex, mitochondrial OS=Homo sapiens GN=DLST PE=1 SV=4 - [ODO2_HUMAN]	32.45	2	14	14	50	1.08329e+07	2.68346e+07	41.8124	21.19	10	17	84.6293	30.46	13	33	453	48.7245	8.95361
P09493	Tropomyosin alpha-1 chain OS=Homo sapiens GN=TPM1 PE=1 SV=2 - [TPM1_HUMAN]	54.58	10	3	23	48	2.80934e+07	1.18366e+08	29.7583	30.63	11	15	81.2263	49.65	21	33	284	32.6887	4.7417
P14314	Glucosidase 2 subunit beta OS=Homo sapiens GN=PRKCSH PE=1 SV=2 - [GLU2B_HUMAN]	31.82	6	16	16	48	8.68243e+06	3.52967e+07	29.9696	21.21	9	15	77.2108	31.82	16	33	528	59.3878	4.41162
P04083	Annexin A1 OS=Homo sapiens GN=ANXA1 PE=1 SV=2 - [ANXA1_HUMAN]	60.4	3	19	19	44	7.85566e+06	3.19635e+07	17.8051	35.55	10	11	90.9771	57.8	18	33	346	38.69	7.02002
P05026	Sodium/potassium-transporting ATPase subunit beta-1 OS=Homo sapiens GN=ATP1B1 PE=1 SV=1 - [AT1B1_HUMAN]	43.56	2	15	15	43	2.58429e+07	1.33544e+08	19.4134	26.73	8	10	76.371	43.56	15	33	303	35.0389	8.52881
P04114	Apolipoprotein B-100 OS=Homo sapiens GN=APOB PE=1 SV=2 - [APOB_HUMAN]	9.84	2	33	33	36	343711	7.58571e+06	1.93529	0.83	3	3	76.8013	9.45	32	33	4563	515.283	7.04932
P16152	Carbonyl reductase [NADPH] 1 OS=Homo sapiens GN=CBR1 PE=1 SV=3 - [CBR1_HUMAN]	74.37	4	17	17	62	2.74863e+07	7.89521e+07	73.172	67.15	15	30	91.5021	63.54	16	32	277	30.3559	8.32373
O95154	Aflatoxin B1 aldehyde reductase member 3 OS=Homo sapiens GN=AKR7A3 PE=1 SV=2 - [ARK73_HUMAN]	55.29	1	13	14	57	2.05495e+07	5.37627e+07	65.6219	41.69	11	25	94.9623	54.98	13	32	331	37.1825	7.15186
P02766	Transthyretin OS=Homo sapiens GN=TTR PE=1 SV=1 - [TTHY_HUMAN]	73.47	3	14	14	56	1.36551e+07	7.91672e+07	56.7664	65.31	11	24	109.935	73.47	14	32	147	15.877	5.75732
P30041	Peroxiredoxin-6 OS=Homo sapiens GN=PRDX6 PE=1 SV=3 - [PRDX6_HUMAN]	64.29	1	14	14	56	4.7554e+07	1.16826e+08	61.121	63.39	13	24	99.1667	64.29	14	32	224	25.0192	6.37939
P09210	Glutathione S-transferase A2 OS=Homo sapiens GN=GSTA2 PE=1 SV=4 - [GSTA2_HUMAN]	58.56	2	2	21	55	1.73466e+08	2.86989e+08	53.761	49.1	14	23	90.4145	54.5	19	32	222	25.6476	8.5874
	>sp|GSTA1_HUMAN|	55.66	6	1	20	54	1.73466e+08	2.86989e+08	51.8805	46.15	13	22	90.4521	54.75	19	32	221	25.4836	8.88037
P36871	Phosphoglucomutase-1 OS=Homo sapiens GN=PGM1 PE=1 SV=3 - [PGM1_HUMAN]	65.3	1	27	27	53	7.54335e+06	1.84179e+07	42.6005	41.1	18	21	64.3388	59.79	23	32	562	61.4105	6.75635
P01860	Immunoglobulin heavy constant gamma 3 OS=Homo sapiens GN=IGHG3 PE=1 SV=2 - [IGHG3_HUMAN]	50.66	1	5	15	52	6.70813e+07	2.04546e+08	47.1734	29.97	8	20	90.5294	45.09	14	32	377	41.2604	7.89893
P11177	Pyruvate dehydrogenase E1 component subunit beta, mitochondrial OS=Homo sapiens GN=PDHB PE=1 SV=3 - [ODPB_HUMAN]	60.72	3	16	16	51	2.43271e+07	4.76605e+07	47.4071	37.05	11	19	81.8041	60.72	16	32	359	39.208	6.65381
Q9Y696	Chloride intracellular channel protein 4 OS=Homo sapiens GN=CLIC4 PE=1 SV=4 - [CLIC4_HUMAN]	78.66	1	19	19	50	2.39792e+07	5.17616e+07	43.8176	54.55	11	18	95.4121	75.89	18	32	253	28.7537	5.59229
P11766	Alcohol dehydrogenase class-3 OS=Homo sapiens GN=ADH5 PE=1 SV=4 - [ADHX_HUMAN]	39.84	5	20	20	49	1.64263e+07	4.5546e+07	35.0496	33.42	10	17	76.3559	39.84	20	32	374	39.6984	7.48877
P35749	Myosin-11 OS=Homo sapiens GN=MYH11 PE=1 SV=3 - [MYH11_HUMAN]	14.05	13	12	23	47	5.09195e+06	2.05725e+07	34.4725	5.83	12	15	64.886	13.44	21	32	1972	227.199	5.50342
A0A0B4J2D5	Uncharacterized protein OS=Homo sapiens GN=LOC102724023 PE=1 SV=1 - [A0A0B4J2D5_HUMAN]	66.04	11	15	15	60	2.5292e+07	3.80822e+07	56.402	64.93	13	29	82.5321	62.69	14	31	268	28.1247	8.26514
P36542	ATP synthase subunit gamma, mitochondrial OS=Homo sapiens GN=ATP5C1 PE=1 SV=1 - [ATPG_HUMAN]	41.61	1	16	16	60	3.48008e+07	5.0468e+07	65.9334	37.25	12	29	81.6492	41.61	15	31	298	32.9753	9.21729
P13667	Protein disulfide-isomerase A4 OS=Homo sapiens GN=PDIA4 PE=1 SV=2 - [PDIA4_HUMAN]	42.95	2	25	25	55	1.05785e+07	2.01714e+07	50.7053	35.97	18	24	71.4705	36.28	22	31	645	72.887	5.07178
Q02928	Cytochrome P450 4A11 OS=Homo sapiens GN=CYP4A11 PE=1 SV=1 - [CP4AB_HUMAN]	55.68	13	20	20	52	1.78073e+07	2.91944e+07	37.5169	44.7	15	21	81.8989	51.25	19	31	519	59.3099	8.76318
Q8WUM4	Programmed cell death 6-interacting protein OS=Homo sapiens GN=PDCD6IP PE=1 SV=1 - [PDC6I_HUMAN]	45.85	5	30	30	51	6.54576e+06	1.58233e+07	38.777	24.31	17	20	81.7033	41.47	27	31	868	95.9631	6.52197
K7EJH8	Alpha-actinin-4 (Fragment) OS=Homo sapiens GN=ACTN4 PE=1 SV=1 - [K7EJH8_HUMAN]	75.27	1	2	13	50	1.2312e+07	5.22453e+07	56.0515	52.75	9	19	90.7948	75.27	12	31	182	21.417	6.69775
P07911	Uromodulin OS=Homo sapiens GN=UMOD PE=1 SV=1 - [UROM_HUMAN]	26.88	2	18	18	42	6.35331e+06	3.0754e+07	23.0986	13.91	8	11	72.8277	26.88	17	31	640	69.7144	5.23682
P0DOY3	Immunoglobulin lambda constant 3 OS=Homo sapiens GN=IGLC3 PE=1 SV=1 - [IGLC3_HUMAN]	88.68	4	7	11	40	2.76546e+07	1.02968e+08	17.1957	41.51	3	9	88.518	88.68	11	31	106	11.2585	7.23975
P53634	Dipeptidyl peptidase 1 OS=Homo sapiens GN=CTSC PE=1 SV=2 - [CATC_HUMAN]	33.48	2	13	13	40	1.33763e+07	7.54141e+07	24.0991	16.2	5	9	90.3072	33.48	13	31	463	51.8203	6.99072
P36269	Gamma-glutamyltransferase 5 OS=Homo sapiens GN=GGT5 PE=1 SV=2 - [GGT5_HUMAN]	35.84	3	16	16	38	6.32549e+06	4.47277e+07	17.9233	16.04	7	7	88.0903	35.84	16	31	586	62.2223	7.54736
Q6YN16	Hydroxysteroid dehydrogenase-like protein 2 OS=Homo sapiens GN=HSDL2 PE=1 SV=1 - [HSDL2_HUMAN]	57.66	1	22	22	60	2.56962e+07	3.48463e+07	88.0462	42.82	17	30	91.0321	51.2	16	30	418	45.3655	7.98682
Q14914	Prostaglandin reductase 1 OS=Homo sapiens GN=PTGR1 PE=1 SV=2 - [PTGR1_HUMAN]	54.1	4	17	17	60	1.9555e+07	3.86333e+07	70.1725	45.9	14	30	76.1907	51.37	14	30	329	35.8467	8.29443
Q9UJS0	Calcium-binding mitochondrial carrier protein Aralar2 OS=Homo sapiens GN=SLC25A13 PE=1 SV=2 - [CMC2_HUMAN]	40.74	2	16	20	50	9.30165e+06	1.79803e+07	44.6602	25.78	15	20	76.3286	40.74	20	30	675	74.1286	8.6167
P12235	ADP/ATP translocase 1 OS=Homo sapiens GN=SLC25A4 PE=1 SV=4 - [ADT1_HUMAN]	53.69	3	4	18	49	8.44756e+07	1.35886e+08	45.1188	41.28	13	19	76.6766	53.69	17	30	298	33.0432	9.75928
P00740	Coagulation factor IX OS=Homo sapiens GN=F9 PE=1 SV=2 - [FA9_HUMAN]	33.41	1	14	14	49	8.84401e+06	4.81711e+07	48.2437	31.67	11	19	91.2587	33.41	14	30	461	51.745	5.46533
Q32Q12	Nucleoside diphosphate kinase OS=Homo sapiens GN=NME1-NME2 PE=1 SV=1 - [Q32Q12_HUMAN]	66.78	8	7	14	48	2.52225e+07	6.12453e+07	44.3123	55.14	9	18	80.1327	66.1	13	30	292	32.6209	8.48486
Q02952	A-kinase anchor protein 12 OS=Homo sapiens GN=AKAP12 PE=1 SV=4 - [AKA12_HUMAN]	26.21	1	28	28	33	1.50357e+06	1.36133e+07	7.2768	2.41	3	3	70.8878	26.21	28	30	1782	191.367	4.41162
Q9BSE5	Agmatinase, mitochondrial OS=Homo sapiens GN=AGMAT PE=1 SV=2 - [SPEB_HUMAN]	42.61	1	15	15	64	7.93754e+07	4.98645e+07	88.3108	42.61	14	35	68.8036	42.33	12	29	352	37.6362	7.59131
J3KS22	L-xylulose reductase (Fragment) OS=Homo sapiens GN=DCXR PE=1 SV=8 - [J3KS22_HUMAN]	63.68	8	13	13	57	2.23926e+07	5.07982e+07	56.6321	62.78	12	28	64.4362	59.64	12	29	223	23.7886	8.20654
P31946	14-3-3 protein beta/alpha OS=Homo sapiens GN=YWHAB PE=1 SV=3 - [1433B_HUMAN]	60.57	6	9	16	52	6.31148e+07	1.47809e+08	39.058	43.9	12	23	65.3462	60.57	15	29	246	28.0648	4.83057
O60656	UDP-glucuronosyltransferase 1-9 OS=Homo sapiens GN=UGT1A9 PE=1 SV=1 - [UD19_HUMAN]	33.02	10	8	14	52	1.70891e+07	4.07859e+07	51.555	25.09	12	23	74.7478	33.02	14	29	530	59.9015	7.89893
P07737	Profilin-1 OS=Homo sapiens GN=PFN1 PE=1 SV=2 - [PROF1_HUMAN]	70.71	3	13	13	50	5.73139e+07	1.73019e+08	53.0728	67.14	11	21	92.7483	70.71	13	29	140	15.0446	8.26514
P04792	Heat shock protein beta-1 OS=Homo sapiens GN=HSPB1 PE=1 SV=2 - [HSPB1_HUMAN]	64.88	3	16	16	49	6.18195e+07	9.46629e+07	55.6001	64.88	11	20	81.8826	60.98	15	29	205	22.7685	6.40479
P01861	Immunoglobulin heavy constant gamma 4 OS=Homo sapiens GN=IGHG4 PE=1 SV=1 - [IGHG4_HUMAN]	53.82	1	5	13	42	4.40534e+07	1.52983e+08	33.0793	15.29	5	13	79.2125	53.82	13	29	327	35.9179	7.35693
P00505	Aspartate aminotransferase, mitochondrial OS=Homo sapiens GN=GOT2 PE=1 SV=3 - [AATM_HUMAN]	51.16	1	16	16	35	4.53186e+06	3.14283e+07	15.6605	21.16	6	6	80.9594	51.16	16	29	430	47.4873	9.01221
Q9H2M3	S-methylmethionine--homocysteine S-methyltransferase BHMT2 OS=Homo sapiens GN=BHMT2 PE=1 SV=1 - [BHMT2_HUMAN]	60.61	2	12	17	55	9.3996e+07	8.96628e+07	70.3571	54.27	14	27	75.5017	55.92	15	28	363	40.3282	5.87158
Q16762	Thiosulfate sulfurtransferase OS=Homo sapiens GN=TST PE=1 SV=4 - [THTR_HUMAN]	53.87	3	13	13	53	4.5514e+07	7.29888e+07	67.2654	46.46	12	25	72.9539	53.87	13	28	297	33.4078	7.25439
Q9H2U2	Inorganic pyrophosphatase 2, mitochondrial OS=Homo sapiens GN=PPA2 PE=1 SV=2 - [IPYR2_HUMAN]	61.98	10	17	18	47	1.11137e+07	2.17183e+07	33.7564	50.9	14	19	60.738	55.99	17	28	334	37.896	7.38623
P02774	Vitamin D-binding protein OS=Homo sapiens GN=GC PE=1 SV=1 - [VTDB_HUMAN]	46.2	4	17	17	45	1.34556e+07	4.67684e+07	29.7227	33.33	12	17	75.3965	46.2	16	28	474	52.929	5.5415
Q16853	Membrane primary amine oxidase OS=Homo sapiens GN=AOC3 PE=1 SV=3 - [AOC3_HUMAN]	26.21	4	15	15	36	4.70604e+06	2.58499e+07	15.7478	7.08	5	8	71.6989	26.21	15	28	763	84.5683	6.52197
P98160	Basement membrane-specific heparan sulfate proteoglycan core protein OS=Homo sapiens GN=HSPG2 PE=1 SV=4 - [PGBM_HUMAN]	9.43	2	27	27	32	429986	4.64566e+06	5.97145	1.14	4	4	58.621	9.22	26	28	4391	468.532	6.50732
Q16822	Phosphoenolpyruvate carboxykinase [GTP], mitochondrial OS=Homo sapiens GN=PCK2 PE=1 SV=3 - [PCKGM_HUMAN]	66.09	7	11	37	107	9.81851e+07	2.06477e+07	201.264	59.84	35	80	58.7465	45.94	21	27	640	70.6846	7.62061
J3KPX7	Prohibitin-2 OS=Homo sapiens GN=PHB2 PE=1 SV=2 - [J3KPX7_HUMAN]	59.06	8	16	16	52	2.15941e+07	4.58904e+07	66.5349	49.66	14	25	67.0512	55.7	14	27	298	33.2189	9.83252
P30613	Pyruvate kinase PKLR OS=Homo sapiens GN=PKLR PE=1 SV=2 - [KPYR_HUMAN]	48.78	1	20	22	52	2.42282e+07	8.11299e+07	55.9953	40.59	19	25	70.1945	42.51	18	27	574	61.7915	7.73779
F8W1A4	Adenylate kinase 2, mitochondrial OS=Homo sapiens GN=AK2 PE=1 SV=1 - [F8W1A4_HUMAN]	69.83	6	15	15	46	3.47855e+07	5.39911e+07	49.7642	50.86	10	19	82.0854	69.83	15	27	232	25.6143	7.82568
P00387	NADH-cytochrome b5 reductase 3 OS=Homo sapiens GN=CYB5R3 PE=1 SV=3 - [NB5R3_HUMAN]	63.46	2	14	14	33	2.29365e+06	2.32615e+07	8.17882	38.54	5	6	68.9212	63.46	14	27	301	34.2127	7.59131
P17174	Aspartate aminotransferase, cytoplasmic OS=Homo sapiens GN=GOT1 PE=1 SV=3 - [AATC_HUMAN]	55.93	1	19	19	55	2.71665e+07	4.58575e+07	80.5266	45.28	15	29	75.2169	47.22	15	26	413	46.2185	7.00537
P53597	Succinate--CoA ligase [ADP/GDP-forming] subunit alpha, mitochondrial OS=Homo sapiens GN=SUCLG1 PE=1 SV=4 - [SUCA_HUMAN]	46.53	2	19	19	52	5.96278e+07	5.82671e+07	62.288	42.49	13	26	50.2862	46.53	17	26	346	36.2268	8.79248
P61981	14-3-3 protein gamma OS=Homo sapiens GN=YWHAG PE=1 SV=2 - [1433G_HUMAN]	59.92	3	7	14	47	6.19711e+07	1.32848e+08	31.489	34.82	9	21	59.2095	59.92	14	26	247	28.2849	4.89404
P02649	Apolipoprotein E OS=Homo sapiens GN=APOE PE=1 SV=1 - [APOE_HUMAN]	64.67	4	21	21	45	7.22497e+06	1.6443e+07	36.1362	50.47	14	19	56.9904	59.62	19	26	317	36.1318	5.73193
Q15084	Protein disulfide-isomerase A6 OS=Homo sapiens GN=PDIA6 PE=1 SV=1 - [PDIA6_HUMAN]	42.5	1	15	15	45	1.30817e+07	5.26594e+07	50.7059	31.14	12	19	79.4998	42.5	15	26	440	48.0913	5.08447
A0A0A0MR02	Voltage-dependent anion-selective channel protein 2 (Fragment) OS=Homo sapiens GN=VDAC2 PE=1 SV=1 - [A0A0A0MR02_HUMAN]	65.6	5	17	17	44	3.36168e+07	9.33276e+07	37.3554	48.58	12	18	72.5213	64.89	16	26	282	30.3289	7.81104
H0YKX5	Tropomyosin alpha-1 chain (Fragment) OS=Homo sapiens GN=TPM1 PE=1 SV=1 - [H0YKX5_HUMAN]	83.1	3	3	17	41	2.80934e+07	1.18366e+08	24.4985	61.97	11	15	63.3245	68.31	14	26	142	16.3553	4.7417
P50990	T-complex protein 1 subunit theta OS=Homo sapiens GN=CCT8 PE=1 SV=4 - [TCPQ_HUMAN]	45.99	3	21	21	41	9.65189e+06	2.02665e+07	30.9807	28.83	12	15	56.7594	37.77	18	26	548	59.5825	5.60498
	>sp|FABPH_HUMAN|	79.55	5	13	13	40	1.32973e+07	4.42202e+07	20.7616	57.58	9	14	54.7227	79.55	13	26	132	14.7177	6.80029
H0YK48	Tropomyosin alpha-1 chain OS=Homo sapiens GN=TPM1 PE=1 SV=1 - [H0YK48_HUMAN]	53.63	4	2	17	39	2.80934e+07	1.18366e+08	30.4012	33.06	8	13	63.6193	47.98	15	26	248	28.5625	4.76709
P02749	Beta-2-glycoprotein 1 OS=Homo sapiens GN=APOH PE=1 SV=3 - [APOH_HUMAN]	48.41	4	14	14	39	1.10668e+07	5.80157e+07	29.9792	39.13	11	13	70.1996	48.41	14	26	345	38.2727	7.97217
Q00325	Phosphate carrier protein, mitochondrial OS=Homo sapiens GN=SLC25A3 PE=1 SV=2 - [MPCP_HUMAN]	37.02	3	3	18	37	4.23881e+07	1.03999e+08	19.9983	21.55	10	11	48.7821	34.81	17	26	362	40.0687	9.37842
P22830	Ferrochelatase, mitochondrial OS=Homo sapiens GN=FECH PE=1 SV=2 - [HEMH_HUMAN]	47.75	6	16	16	34	2.93958e+06	2.51569e+07	16.3911	20.57	6	8	65.5771	47.75	15	26	423	47.8316	8.73389
P42704	Leucine-rich PPR motif-containing protein, mitochondrial OS=Homo sapiens GN=LRPPRC PE=1 SV=3 - [LPPRC_HUMAN]	34.94	5	41	41	67	9.92273e+06	6.00803e+06	86.9053	27.4	34	42	47.6326	21.31	22	25	1394	157.805	6.12549
Q86TX2	Acyl-coenzyme A thioesterase 1 OS=Homo sapiens GN=ACOT1 PE=1 SV=1 - [ACOT1_HUMAN]	57.96	2	1	19	52	2.57396e+07	3.29551e+07	61.902	49.17	17	27	67.7059	52.73	16	25	421	46.2481	7.34229
A0A087X0W7	Acyl-coenzyme A thioesterase 2, mitochondrial OS=Homo sapiens GN=ACOT2 PE=1 SV=1 - [A0A087X0W7_HUMAN]	60.57	3	1	19	50	2.57396e+07	3.29551e+07	59.8217	46.08	16	25	68.4011	55.34	16	25	421	46.263	7.02002
P35580	Myosin-10 OS=Homo sapiens GN=MYH10 PE=1 SV=3 - [MYH10_HUMAN]	16.55	14	13	27	48	5.59626e+06	1.35771e+07	46.789	10.73	20	23	53.6111	10.58	17	25	1976	228.858	5.5415
F5GZS6	4F2 cell-surface antigen heavy chain OS=Homo sapiens GN=SLC3A2 PE=1 SV=1 - [F5GZS6_HUMAN]	35.39	9	18	18	46	9.20108e+06	1.5251e+07	44.2981	25.04	13	21	56.2002	29.88	16	25	599	64.8322	5.09717
P27348	14-3-3 protein theta OS=Homo sapiens GN=YWHAQ PE=1 SV=1 - [1433T_HUMAN]	56.73	3	9	14	45	5.97071e+07	1.34206e+08	34.5281	46.12	10	20	60.9364	56.73	14	25	245	27.7468	4.77979
A0A0C4DGA2	Enoyl-CoA delta isomerase 2, mitochondrial OS=Homo sapiens GN=ECI2 PE=1 SV=1 - [A0A0C4DGA2_HUMAN]	42.31	6	13	13	41	6.34304e+06	3.10714e+07	40.912	34.62	10	16	81.9629	42.31	12	25	364	40.1576	8.76318
P07099	Epoxide hydrolase 1 OS=Homo sapiens GN=EPHX1 PE=1 SV=1 - [HYEP_HUMAN]	40.44	3	18	18	41	7.2903e+06	2.3357e+07	27.4568	18.46	9	16	58.3055	37.8	16	25	455	52.915	7.25439
Q93099	Homogentisate 1,2-dioxygenase OS=Homo sapiens GN=HGD PE=1 SV=2 - [HGD_HUMAN]	53.71	5	17	17	40	4.18204e+06	2.12414e+07	30.0427	36.63	12	15	61.1068	47.42	14	25	445	49.9316	6.96143
O43488	Aflatoxin B1 aldehyde reductase member 2 OS=Homo sapiens GN=AKR7A2 PE=1 SV=3 - [ARK72_HUMAN]	42.34	3	10	11	40	1.91717e+07	5.95351e+07	40.3297	35.38	8	15	79.7895	39	10	25	359	39.5637	7.1665
P14866	Heterogeneous nuclear ribonucleoprotein L OS=Homo sapiens GN=HNRNPL PE=1 SV=2 - [HNRPL_HUMAN]	37.52	10	17	17	40	7.19859e+06	2.40395e+07	28.7763	21.73	11	15	54.8801	35.82	15	25	589	64.0924	8.22119
P13010	X-ray repair cross-complementing protein 5 OS=Homo sapiens GN=XRCC5 PE=1 SV=3 - [XRCC5_HUMAN]	38.8	2	21	21	38	2.96279e+06	1.49071e+07	15.2121	18.99	11	13	63.0434	35.11	18	25	732	82.6523	5.80811
P51884	Lumican OS=Homo sapiens GN=LUM PE=1 SV=2 - [LUM_HUMAN]	35.5	1	13	13	36	1.18644e+07	3.95578e+07	21.3559	18.64	7	11	54.5307	35.5	13	25	338	38.4048	6.60986
P60981	Destrin OS=Homo sapiens GN=DSTN PE=1 SV=3 - [DEST_HUMAN]	62.42	2	10	13	35	2.74876e+06	1.51527e+07	21.3092	37.58	7	10	65.6563	62.42	13	25	165	18.4935	7.85498
H0YNC7	Tropomyosin alpha-1 chain (Fragment) OS=Homo sapiens GN=TPM1 PE=1 SV=1 - [H0YNC7_HUMAN]	59.64	3	1	17	35	2.80934e+07	1.18366e+08	21.6428	26.01	6	10	62.7635	53.36	15	25	223	25.5649	4.64014
Q86VP6	Cullin-associated NEDD8-dissociated protein 1 OS=Homo sapiens GN=CAND1 PE=1 SV=2 - [CAND1_HUMAN]	23.5	6	23	23	34	3.28619e+06	1.10087e+07	12.1545	8.86	9	9	59.969	22.68	22	25	1230	136.289	5.78271
P23284	Peptidyl-prolyl cis-trans isomerase B OS=Homo sapiens GN=PPIB PE=1 SV=2 - [PPIB_HUMAN]	56.94	1	15	15	33	8.57636e+06	3.87393e+07	17.0377	38.89	7	8	66.5289	56.94	15	25	216	23.7275	9.40771
P19440	Gamma-glutamyltranspeptidase 1 OS=Homo sapiens GN=GGT1 PE=1 SV=2 - [GGT1_HUMAN]	23.9	17	12	12	33	1.03759e+07	6.99313e+07	19.4554	14.59	7	8	73.8201	23.9	12	25	569	61.3718	7.12256
P23786	Carnitine O-palmitoyltransferase 2, mitochondrial OS=Homo sapiens GN=CPT2 PE=1 SV=2 - [CPT2_HUMAN]	55.62	9	30	30	77	1.95782e+07	1.31282e+07	123.647	54.56	29	53	42.5062	37.99	19	24	658	73.7304	8.17725
P11586	C-1-tetrahydrofolate synthase, cytoplasmic OS=Homo sapiens GN=MTHFD1 PE=1 SV=3 - [C1TC_HUMAN]	40.96	3	29	29	51	9.23854e+06	1.24072e+07	62.6828	30.59	22	27	53.6104	33.48	21	24	935	101.495	7.29834
Q92597	Protein NDRG1 OS=Homo sapiens GN=NDRG1 PE=1 SV=1 - [NDRG1_HUMAN]	44.67	12	11	11	45	1.57078e+07	2.65089e+07	63.7411	34.26	9	21	76.5896	40.61	10	24	394	42.8077	5.8208
O75947	ATP synthase subunit d, mitochondrial OS=Homo sapiens GN=ATP5H PE=1 SV=3 - [ATP5H_HUMAN]	81.99	2	12	13	42	2.89559e+07	4.8999e+07	43.5364	74.53	9	18	47.7286	75.78	12	24	161	18.4795	5.30029
Q9BUT1	3-hydroxybutyrate dehydrogenase type 2 OS=Homo sapiens GN=BDH2 PE=1 SV=2 - [BDH2_HUMAN]	52.24	6	11	11	40	2.83675e+07	1.22444e+08	40.6352	40.41	8	16	71.1136	52.24	11	24	245	26.7067	7.6499
P12956	X-ray repair cross-complementing protein 6 OS=Homo sapiens GN=XRCC6 PE=1 SV=2 - [XRCC6_HUMAN]	40.56	2	21	21	38	5.60309e+06	1.93989e+07	36.6243	24.14	12	14	62.0765	36.29	19	24	609	69.7991	6.63916
P50991	T-complex protein 1 subunit delta OS=Homo sapiens GN=CCT4 PE=1 SV=4 - [TCPD_HUMAN]	53.8	1	19	19	36	6.61804e+06	1.57335e+07	21.1351	17.25	7	12	49.1852	53.8	19	24	539	57.8878	7.82568
Q9UBQ7	Glyoxylate reductase/hydroxypyruvate reductase OS=Homo sapiens GN=GRHPR PE=1 SV=1 - [GRHPR_HUMAN]	53.66	2	15	15	33	1.68736e+07	8.01544e+07	23.4419	36.59	8	9	80.2744	53.66	14	24	328	35.6457	7.38623
P62879	Guanine nucleotide-binding protein G(I)/G(S)/G(T) subunit beta-2 OS=Homo sapiens GN=GNB2 PE=1 SV=3 - [GBB2_HUMAN]	58.53	11	7	14	32	1.4169e+07	3.40335e+07	16.1147	22.35	6	8	54.7008	58.53	14	24	340	37.3071	5.99854
A0A0G2JMB2	Immunoglobulin heavy constant alpha 2 (Fragment) OS=Homo sapiens GN=IGHA2 PE=1 SV=1 - [A0A0G2JMB2_HUMAN]	42.06	2	2	10	32	1.07752e+07	1.33276e+08	16.5464	18.82	5	8	71.5216	40	9	24	340	36.4851	6.1001
P13796	Plastin-2 OS=Homo sapiens GN=LCP1 PE=1 SV=6 - [PLSL_HUMAN]	41.79	3	16	20	32	2.80154e+06	1.38857e+07	12.7183	12.12	6	8	58.4157	40.19	19	24	627	70.2439	5.42725
Q9BPW8	Protein NipSnap homolog 1 OS=Homo sapiens GN=NIPSNAP1 PE=1 SV=1 - [NIPS1_HUMAN]	67.25	4	15	15	48	2.10042e+07	2.16238e+07	60.7135	40.14	10	25	50.5886	56.69	12	23	284	33.2888	9.30518
P16444	Dipeptidase 1 OS=Homo sapiens GN=DPEP1 PE=1 SV=3 - [DPEP1_HUMAN]	54.5	3	16	16	47	2.46584e+07	3.54109e+07	47.91	40.15	12	24	51.7758	52.55	14	23	411	45.645	6.15088
	>sp|SODC_HUMAN|	91.5	3	14	14	46	2.46514e+07	1.06837e+08	69.9042	84.97	12	23	75.3259	91.5	11	23	153	15.7949	6.12549
Q9BYV1	Alanine--glyoxylate aminotransferase 2, mitochondrial OS=Homo sapiens GN=AGXT2 PE=1 SV=1 - [AGT2_HUMAN]	45.14	1	19	19	44	7.841e+06	2.13824e+07	43.3206	32.3	15	21	52.4751	43.39	18	23	514	57.1188	7.86963
P30153	Serine/threonine-protein phosphatase 2A 65 kDa regulatory subunit A alpha isoform OS=Homo sapiens GN=PPP2R1A PE=1 SV=4 - [2AAA_HUMAN]	39.9	9	17	17	41	6.45806e+06	1.80021e+07	35.0238	30.56	13	18	50.387	34.3	15	23	589	65.2669	5.10986
B4DJV2	Citrate synthase OS=Homo sapiens GN=CS PE=1 SV=1 - [B4DJV2_HUMAN]	45.25	19	15	15	40	2.53694e+07	5.06494e+07	32.2547	26.71	12	17	47.5596	43.05	14	23	453	50.3997	7.89893
Q14103	Heterogeneous nuclear ribonucleoprotein D0 OS=Homo sapiens GN=HNRNPD PE=1 SV=1 - [HNRPD_HUMAN]	43.1	7	14	16	40	7.46777e+06	5.97899e+07	27.0267	30.14	11	17	59.0454	40	14	23	355	38.4103	7.81104
P61586	Transforming protein RhoA OS=Homo sapiens GN=RHOA PE=1 SV=1 - [RHOA_HUMAN]	44.56	12	2	10	39	8.67102e+06	3.3828e+07	33.5122	44.56	8	16	57.5638	44.56	10	23	193	21.7541	6.1001
P78371	T-complex protein 1 subunit beta OS=Homo sapiens GN=CCT2 PE=1 SV=4 - [TCPB_HUMAN]	50.28	3	18	18	37	6.42366e+06	1.07268e+07	18.9545	31.4	11	14	56.4146	50.28	18	23	535	57.4521	6.45557
Q15365	Poly(rC)-binding protein 1 OS=Homo sapiens GN=PCBP1 PE=1 SV=2 - [PCBP1_HUMAN]	59.27	2	9	12	36	2.51842e+07	4.7466e+07	32.6087	40.17	9	13	65.6085	59.27	12	23	356	37.4739	7.09326
Q16181	Septin-7 OS=Homo sapiens GN=SEPT7 PE=1 SV=2 - [SEPT7_HUMAN]	38.44	10	14	15	35	1.06261e+07	4.8907e+07	24.1678	23.34	8	12	52.7366	38.44	15	23	437	50.648	8.63135
F8VVM2	Phosphate carrier protein, mitochondrial OS=Homo sapiens GN=SLC25A3 PE=1 SV=1 - [F8VVM2_HUMAN]	45.99	4	1	16	33	4.23881e+07	1.2425e+08	12.8989	28.7	8	10	46.6538	43.52	15	23	324	36.1376	9.26123
P62873	Guanine nucleotide-binding protein G(I)/G(S)/G(T) subunit beta-1 OS=Homo sapiens GN=GNB1 PE=1 SV=3 - [GBB1_HUMAN]	60.29	11	8	14	32	1.64346e+07	4.41608e+07	20.1031	27.94	7	9	61.7128	60.29	14	23	340	37.353	5.99854
P09429	High mobility group protein B1 OS=Homo sapiens GN=HMGB1 PE=1 SV=3 - [HMGB1_HUMAN]	46.51	4	9	12	31	6.07984e+06	3.34942e+07	20.8321	39.53	6	8	72.9162	46.51	11	23	215	24.8782	5.74463
P00739	Haptoglobin-related protein OS=Homo sapiens GN=HPR PE=2 SV=2 - [HPTR_HUMAN]	33.62	3	1	12	31	6.7614e+06	8.29777e+07	16.559	18.39	5	8	57.438	33.62	12	23	348	39.0047	7.09326
Q9UHD8	Septin-9 OS=Homo sapiens GN=SEPT9 PE=1 SV=2 - [SEPT9_HUMAN]	45.39	18	17	17	30	2.82058e+06	1.60108e+07	12.2181	16.38	6	7	51.8985	45.39	17	23	586	65.3608	8.96826
Q15019	Septin-2 OS=Homo sapiens GN=SEPT2 PE=1 SV=1 - [SEPT2_HUMAN]	54.57	17	14	14	29	3.95805e+06	2.17633e+07	8.48639	19.39	5	6	59.4682	54.57	14	23	361	41.4613	6.59521
Q16134	Electron transfer flavoprotein-ubiquinone oxidoreductase, mitochondrial OS=Homo sapiens GN=ETFDH PE=1 SV=2 - [ETFD_HUMAN]	52.84	2	25	25	53	2.90795e+07	1.25864e+07	70.3686	45.71	22	31	44.2266	29.01	15	22	617	68.4519	7.54736
P32189	Glycerol kinase OS=Homo sapiens GN=GK PE=1 SV=3 - [GLPK_HUMAN]	39.89	10	21	21	49	1.0595e+07	1.41731e+07	61.5579	35.6	19	27	50.8875	31.13	15	22	559	61.2051	6.53662
	>sp|CAH1_HUMAN|	58.85	14	13	13	39	1.3734e+07	2.63643e+07	30.583	53.46	11	17	42.4149	58.85	13	22	260	28.7213	7.12256
Q04917	14-3-3 protein eta OS=Homo sapiens GN=YWHAH PE=1 SV=4 - [1433F_HUMAN]	45.93	6	8	14	39	5.38312e+07	1.26563e+08	26.0155	34.55	10	17	50.7109	45.93	13	22	246	28.201	4.84326
F8W1R7	Myosin light polypeptide 6 OS=Homo sapiens GN=MYL6 PE=1 SV=1 - [F8W1R7_HUMAN]	65.52	16	10	10	38	3.07904e+07	6.40646e+07	40.7798	60.69	9	16	63.6554	65.52	10	22	145	16.2798	4.65283
Q969Z3	Mitochondrial amidoxime reducing component 2 OS=Homo sapiens GN=MARC2 PE=1 SV=1 - [MARC2_HUMAN]	32.84	4	14	14	38	1.25997e+07	2.29718e+07	29.5681	24.78	9	16	44.6661	32.84	14	22	335	37.9987	9.15869
Q96C23	Aldose 1-epimerase OS=Homo sapiens GN=GALM PE=1 SV=1 - [GALM_HUMAN]	55.56	4	14	14	37	2.32459e+07	4.79093e+07	33.4244	40.64	9	15	61.9335	55.56	13	22	342	37.7421	6.65381
P61158	Actin-related protein 3 OS=Homo sapiens GN=ACTR3 PE=1 SV=3 - [ARP3_HUMAN]	50.72	8	16	16	35	4.67076e+06	2.42343e+07	30.875	35.17	10	13	55.2317	50.72	15	22	418	47.341	5.88428
P04843	Dolichyl-diphosphooligosaccharide--protein glycosyltransferase subunit 1 OS=Homo sapiens GN=RPN1 PE=1 SV=1 - [RPN1_HUMAN]	41.19	3	18	18	35	4.54257e+06	1.69759e+07	28.7221	23.72	10	13	58.7322	39.87	17	22	607	68.5268	6.37939
B4E1Z4	cDNA FLJ55673, highly similar to Complement factor B (EC 3.4.21.47) OS=Homo sapiens PE=1 SV=1 - [B4E1Z4_HUMAN]	18.4	13	16	16	35	7.84938e+06	2.96852e+07	23.1894	9.64	9	13	46.5902	18.4	15	22	1266	140.853	7.18115
Q9Y277	Voltage-dependent anion-selective channel protein 3 OS=Homo sapiens GN=VDAC3 PE=1 SV=1 - [VDAC3_HUMAN]	57.6	7	16	17	34	1.41016e+07	3.24655e+07	25.4491	24.03	7	12	41.4555	55.48	15	22	283	30.6393	8.66064
P01011	Alpha-1-antichymotrypsin OS=Homo sapiens GN=SERPINA3 PE=1 SV=2 - [AACT_HUMAN]	28.61	3	11	11	34	7.42684e+06	2.31172e+07	24.124	25.06	9	12	59.6691	28.61	11	22	423	47.6205	5.51611
P61106	Ras-related protein Rab-14 OS=Homo sapiens GN=RAB14 PE=1 SV=4 - [RAB14_HUMAN]	67.44	33	12	14	33	1.4313e+07	4.04401e+07	19.724	56.28	9	11	54.8397	67.44	14	22	215	23.8819	6.21436
P13073	Cytochrome c oxidase subunit 4 isoform 1, mitochondrial OS=Homo sapiens GN=COX4I1 PE=1 SV=1 - [COX41_HUMAN]	42.01	6	12	12	33	5.18847e+07	8.47711e+07	28.8594	32.54	5	11	56.2782	42.01	12	22	169	19.564	9.51025
P00326	Alcohol dehydrogenase 1C OS=Homo sapiens GN=ADH1C PE=1 SV=2 - [ADH1G_HUMAN]	45.6	3	4	15	32	2.38215e+07	7.62176e+07	23.3734	26.13	7	10	56.8796	45.6	15	22	375	39.8417	8.29443
P04899	Guanine nucleotide-binding protein G(i) subunit alpha-2 OS=Homo sapiens GN=GNAI2 PE=1 SV=3 - [GNAI2_HUMAN]	65.92	11	9	16	29	9.2725e+06	3.55179e+07	13.9857	19.44	5	7	43.4577	65.92	16	22	355	40.4251	5.5415
Q9BYF1	Angiotensin-converting enzyme 2 OS=Homo sapiens GN=ACE2 PE=1 SV=2 - [ACE2_HUMAN]	23.73	1	12	12	23	588289	1.32172e+07	0	1.86	1	1	50.0052	23.73	12	22	805	92.4039	5.5415
P33121	Long-chain-fatty-acid--CoA ligase 1 OS=Homo sapiens GN=ACSL1 PE=1 SV=1 - [ACSL1_HUMAN]	49.57	9	29	29	72	6.31125e+07	2.34473e+07	129.63	48.71	28	51	49.8528	32.23	17	21	698	77.8929	7.15186
Q86UP2	Kinectin OS=Homo sapiens GN=KTN1 PE=1 SV=1 - [KTN1_HUMAN]	27.93	7	29	29	47	5.3246e+06	7.07715e+06	58.4748	21.89	23	26	46.872	19.6	20	21	1357	156.179	5.64307
Q96DC8	Enoyl-CoA hydratase domain-containing protein 3, mitochondrial OS=Homo sapiens GN=ECHDC3 PE=1 SV=2 - [ECHD3_HUMAN]	60.73	3	15	15	46	2.94977e+07	1.8019e+07	48.1065	52.48	12	25	46.5306	57.43	13	21	303	32.613	8.646
P16662	UDP-glucuronosyltransferase 2B7 OS=Homo sapiens GN=UGT2B7 PE=1 SV=1 - [UD2B7_HUMAN]	41.21	8	16	16	46	3.65457e+07	4.01454e+07	68.8517	27.6	13	25	56.5312	31.76	11	21	529	60.655	8.30908
P50053	Ketohexokinase OS=Homo sapiens GN=KHK PE=1 SV=2 - [KHK_HUMAN]	47.99	2	16	16	44	2.16266e+07	4.15325e+07	62.8183	39.26	14	23	60.92	44.97	13	21	298	32.5025	6.31592
Q5QNZ2	ATP synthase F(0) complex subunit B1, mitochondrial OS=Homo sapiens GN=ATP5F1 PE=1 SV=1 - [Q5QNZ2_HUMAN]	52.31	2	11	11	39	2.16269e+07	3.40033e+07	48.1178	51.28	9	18	60.9564	52.31	10	21	195	22.2608	9.26123
P30044	Peroxiredoxin-5, mitochondrial OS=Homo sapiens GN=PRDX5 PE=1 SV=4 - [PRDX5_HUMAN]	57.01	1	11	11	37	2.43995e+07	6.98019e+07	42.9047	47.66	8	16	71.007	57.01	11	21	214	22.0725	8.70459
P37837	Transaldolase OS=Homo sapiens GN=TALDO1 PE=1 SV=2 - [TALDO_HUMAN]	41.54	2	15	15	37	1.68673e+07	5.50168e+07	37.1317	34.72	11	16	50.0865	37.98	14	21	337	37.5165	6.81494
F8VTQ5	Heterogeneous nuclear ribonucleoprotein A1 (Fragment) OS=Homo sapiens GN=HNRNPA1 PE=1 SV=1 - [F8VTQ5_HUMAN]	83.45	1	1	13	36	5.22712e+06	2.66191e+07	29.9768	65.52	11	15	52.283	83.45	13	21	145	16.5262	6.63916
Q99536	Synaptic vesicle membrane protein VAT-1 homolog OS=Homo sapiens GN=VAT1 PE=1 SV=2 - [VAT1_HUMAN]	64.89	7	18	18	36	1.76267e+07	4.89299e+07	29.8019	51.91	13	15	57.2925	62.34	15	21	393	41.8934	6.29053
P17987	T-complex protein 1 subunit alpha OS=Homo sapiens GN=TCP1 PE=1 SV=1 - [TCPA_HUMAN]	44.78	10	17	17	36	5.52306e+06	1.02003e+07	25.2735	23.02	10	15	43.2816	42.99	16	21	556	60.3056	6.11279
P00747	Plasminogen OS=Homo sapiens GN=PLG PE=1 SV=2 - [PLMN_HUMAN]	27.41	4	16	16	35	4.40508e+06	1.33671e+07	25.0893	21.85	12	14	38.5064	25.31	15	21	810	90.5102	7.23975
Q86XE5	4-hydroxy-2-oxoglutarate aldolase, mitochondrial OS=Homo sapiens GN=HOGA1 PE=1 SV=1 - [HOGA1_HUMAN]	44.65	2	6	10	34	1.66233e+07	2.65314e+07	27.2398	22.63	7	13	50.75	44.65	10	21	327	35.2259	7.95752
Q99832	T-complex protein 1 subunit eta OS=Homo sapiens GN=CCT7 PE=1 SV=2 - [TCPH_HUMAN]	40.33	2	16	16	34	3.52855e+06	1.17443e+07	23.2368	27.26	10	13	54.6706	40.33	16	21	543	59.3289	7.6499
F6TLX2	Glyoxalase domain-containing protein 4 OS=Homo sapiens GN=GLOD4 PE=1 SV=1 - [F6TLX2_HUMAN]	41.63	5	16	16	33	6.47417e+06	2.3515e+07	22.459	23.9	9	12	47.6042	40.44	15	21	502	54.6847	8.70459
P12277	Creatine kinase B-type OS=Homo sapiens GN=CKB PE=1 SV=1 - [KCRB_HUMAN]	52.23	4	12	12	32	3.71239e+06	2.91204e+07	21.8794	31.23	7	11	53.5657	43.83	11	21	381	42.6173	5.59229
P02765	Alpha-2-HS-glycoprotein OS=Homo sapiens GN=AHSG PE=1 SV=1 - [FETUA_HUMAN]	32.15	2	9	9	31	7.8832e+06	2.18562e+07	28.7762	17.98	6	10	67.8671	28.88	8	21	367	39.2997	5.71924
P11216	Glycogen phosphorylase, brain form OS=Homo sapiens GN=PYGB PE=1 SV=5 - [PYGB_HUMAN]	32.15	5	21	21	29	4.02015e+06	1.16504e+07	10.21	9.96	8	8	44.0339	30.13	18	21	843	96.6345	6.85889
Q16795	NADH dehydrogenase [ubiquinone] 1 alpha subcomplex subunit 9, mitochondrial OS=Homo sapiens GN=NDUFA9 PE=1 SV=2 - [NDUA9_HUMAN]	42.44	4	14	14	28	3.1834e+06	1.88478e+07	6.99906	22.02	6	7	52.3279	38.99	13	21	377	42.4826	9.80322
Q9Y6U3	Adseverin OS=Homo sapiens GN=SCIN PE=1 SV=4 - [ADSV_HUMAN]	31.61	4	18	18	28	1.72173e+06	9.78416e+06	16.6412	12.59	7	7	45.2181	30.35	16	21	715	80.4384	5.70654
P51991	Heterogeneous nuclear ribonucleoprotein A3 OS=Homo sapiens GN=HNRNPA3 PE=1 SV=2 - [ROA3_HUMAN]	37.83	1	17	17	25	2.80614e+06	1.29809e+07	10.2266	10.32	4	4	52.5765	37.83	17	21	378	39.5706	9.01221
P30837	Aldehyde dehydrogenase X, mitochondrial OS=Homo sapiens GN=ALDH1B1 PE=1 SV=3 - [AL1B1_HUMAN]	49.13	5	22	24	62	5.23681e+07	5.0056e+07	118.644	49.13	24	42	49.9404	39.65	15	20	517	57.1702	6.80029
P35914	Hydroxymethylglutaryl-CoA lyase, mitochondrial OS=Homo sapiens GN=HMGCL PE=1 SV=2 - [HMGCL_HUMAN]	37.85	2	14	14	39	1.63623e+07	2.5035e+07	48.7559	34.15	10	19	56.8182	37.85	13	20	325	34.3378	8.54346
P16930	Fumarylacetoacetase OS=Homo sapiens GN=FAH PE=1 SV=2 - [FAAA_HUMAN]	46.78	3	14	14	37	1.39034e+07	2.13729e+07	40.6125	45.82	13	17	55.9266	36.75	12	20	419	46.3442	6.94678
C9JL73	V-type proton ATPase subunit B, kidney isoform OS=Homo sapiens GN=ATP6V1B1 PE=1 SV=1 - [C9JL73_HUMAN]	41.94	6	9	16	37	6.23352e+06	2.08481e+07	35.3523	30.85	13	17	55.7038	41.94	15	20	496	55.0459	5.65576
Q9Y6C9	Mitochondrial carrier homolog 2 OS=Homo sapiens GN=MTCH2 PE=1 SV=1 - [MTCH2_HUMAN]	44.22	1	3	12	36	1.41442e+07	3.33455e+07	37.3129	34.65	9	16	55.8983	44.22	12	20	303	33.3089	7.97217
P10909	Clusterin OS=Homo sapiens GN=CLU PE=1 SV=1 - [CLUS_HUMAN]	28.51	10	12	12	36	1.19012e+07	3.30886e+07	35.6634	22.94	9	16	44.3557	28.51	12	20	449	52.461	6.26514
P01042	Kininogen-1 OS=Homo sapiens GN=KNG1 PE=1 SV=2 - [KNG1_HUMAN]	27.8	1	18	18	35	9.09848e+06	2.78361e+07	29.0852	22.05	13	15	41.3203	25.93	15	20	644	71.9122	6.81494
P61204	ADP-ribosylation factor 3 OS=Homo sapiens GN=ARF3 PE=1 SV=2 - [ARF3_HUMAN]	50.28	8	8	12	34	5.20029e+06	2.05672e+07	31.0265	46.96	8	14	50.511	50.28	11	20	181	20.5877	7.43018
Q9Y6N5	Sulfide:quinone oxidoreductase, mitochondrial OS=Homo sapiens GN=SQRDL PE=1 SV=1 - [SQRD_HUMAN]	48.44	6	17	17	34	6.29084e+06	2.21712e+07	37.749	39.78	12	14	62.1139	46.44	16	20	450	49.9289	9.11475
P51572	B-cell receptor-associated protein 31 OS=Homo sapiens GN=BCAP31 PE=1 SV=3 - [BAP31_HUMAN]	32.93	6	12	12	34	3.20278e+06	9.17852e+06	31.1268	26.42	8	14	45.2334	26.42	10	20	246	27.974	8.44092
P02763	Alpha-1-acid glycoprotein 1 OS=Homo sapiens GN=ORM1 PE=1 SV=1 - [A1AG1_HUMAN]	48.76	1	6	10	33	1.24153e+07	3.62039e+07	21.5284	27.86	6	13	47.2289	48.76	10	20	201	23.4968	5.021
P52209	6-phosphogluconate dehydrogenase, decarboxylating OS=Homo sapiens GN=PGD PE=1 SV=3 - [6PGD_HUMAN]	34.78	5	15	15	33	8.44433e+06	2.62221e+07	32.3428	17.39	8	13	48.3788	34.78	15	20	483	53.106	7.2251
P13797	Plastin-3 OS=Homo sapiens GN=PLS3 PE=1 SV=4 - [PLST_HUMAN]	30.32	4	9	15	33	4.48625e+06	1.99385e+07	30.7104	18.89	9	13	44.6772	25.56	13	20	630	70.7662	5.60498
C9J8Q5	Succinate-semialdehyde dehydrogenase, mitochondrial OS=Homo sapiens GN=ALDH5A1 PE=1 SV=1 - [C9J8Q5_HUMAN]	36.29	2	14	14	31	1.4117e+07	2.88845e+07	18.6867	21.5	8	11	53.6367	36.29	14	20	507	53.8335	8.19189
P07814	Bifunctional glutamate/proline--tRNA ligase OS=Homo sapiens GN=EPRS PE=1 SV=5 - [SYEP_HUMAN]	22.82	3	21	21	31	1.57114e+06	3.47388e+06	15.1566	8.4	10	11	34.6065	21.03	19	20	1512	170.483	7.32764
P30040	Endoplasmic reticulum resident protein 29 OS=Homo sapiens GN=ERP29 PE=1 SV=4 - [ERP29_HUMAN]	43.3	2	10	10	30	1.00635e+07	3.58515e+07	20.7045	38.7	8	10	50.1771	41.38	9	20	261	28.9752	7.31299
Q8N0X4	Citrate lyase subunit beta-like protein, mitochondrial OS=Homo sapiens GN=CLYBL PE=1 SV=2 - [CLYBL_HUMAN]	54.71	5	14	14	29	7.78306e+06	1.7031e+07	22.4583	28.24	7	9	55.5974	54.71	14	20	340	37.3359	8.73389
P40227	T-complex protein 1 subunit zeta OS=Homo sapiens GN=CCT6A PE=1 SV=3 - [TCPZ_HUMAN]	39.17	1	16	16	29	5.13208e+06	1.36048e+07	21.7321	17.7	7	9	55.6585	39.17	15	20	531	57.9876	6.68311
P50502	Hsc70-interacting protein OS=Homo sapiens GN=ST13 PE=1 SV=2 - [F10A1_HUMAN]	28.18	7	10	10	29	1.09715e+07	3.01148e+07	16.0612	19.51	7	9	50.1759	28.18	10	20	369	41.3055	5.2749
P08727	Keratin, type I cytoskeletal 19 OS=Homo sapiens GN=KRT19 PE=1 SV=4 - [K1C19_HUMAN]	56.25	21	14	19	28	7.39343e+06	2.10007e+07	15.5826	16	7	8	48.0189	54	17	20	400	44.0791	5.13525
D6RGI3	Septin 11, isoform CRA_b OS=Homo sapiens GN=SEPT11 PE=1 SV=1 - [D6RGI3_HUMAN]	34.35	9	7	12	27	3.87715e+06	1.78274e+07	9.8045	9.65	4	7	45.0335	34.35	12	20	425	48.9751	6.96143
P07686	Beta-hexosaminidase subunit beta OS=Homo sapiens GN=HEXB PE=1 SV=3 - [HEXB_HUMAN]	25.72	6	14	15	27	2.52344e+06	1.67916e+07	14.0071	11.15	6	7	37.2879	25.72	15	20	556	63.0712	6.75635
A0A087X054	Hypoxia up-regulated protein 1 OS=Homo sapiens GN=HYOU1 PE=1 SV=1 - [A0A087X054_HUMAN]	25.29	13	18	18	26	2.56067e+06	6.20159e+06	9.01174	5.87	5	6	48.922	24.12	17	20	937	104.713	5.71924
P49411	Elongation factor Tu, mitochondrial OS=Homo sapiens GN=TUFM PE=1 SV=2 - [EFTU_HUMAN]	58.19	2	22	22	59	3.31048e+07	1.29414e+07	108.296	54.65	21	40	45.8671	43.14	15	19	452	49.5102	7.60596
P34897	Serine hydroxymethyltransferase, mitochondrial OS=Homo sapiens GN=SHMT2 PE=1 SV=3 - [GLYM_HUMAN]	40.67	13	18	19	41	7.73105e+06	1.24712e+07	48.4712	30.95	16	22	39.1943	34.92	12	19	504	55.9577	8.52881
B9A058	3-hydroxyisobutyryl-CoA hydrolase, mitochondrial OS=Homo sapiens GN=HIBCH PE=1 SV=1 - [B9A058_HUMAN]	65.03	4	3	13	40	2.4761e+07	2.61668e+07	49.8856	60.12	11	21	40.5193	52.76	9	19	163	18.6063	5.17334
Q96DG6	Carboxymethylenebutenolidase homolog OS=Homo sapiens GN=CMBL PE=1 SV=1 - [CMBL_HUMAN]	47.35	1	14	14	39	3.40999e+07	4.26505e+07	42.0026	42.45	12	20	51.8092	47.35	13	19	245	28.0302	7.18115
Q9Y2Q3	Glutathione S-transferase kappa 1 OS=Homo sapiens GN=GSTK1 PE=1 SV=3 - [GSTK1_HUMAN]	61.06	3	11	11	37	1.82492e+07	2.9245e+07	46.4105	57.08	10	18	54.672	61.06	11	19	226	25.4803	8.41162
P49368	T-complex protein 1 subunit gamma OS=Homo sapiens GN=CCT3 PE=1 SV=4 - [TCPG_HUMAN]	35.78	8	17	17	37	7.18986e+06	1.42677e+07	39.5134	28.62	13	18	45.0319	30.28	13	19	545	60.4953	6.49365
P20073	Annexin A7 OS=Homo sapiens GN=ANXA7 PE=1 SV=3 - [ANXA7_HUMAN]	35.45	1	17	17	37	6.84473e+06	1.64191e+07	31.1452	30.33	13	18	41.2097	30.33	14	19	488	52.7058	5.68115
A0A0B4J1R4	4-hydroxyphenylpyruvate dioxygenase OS=Homo sapiens GN=HPD PE=1 SV=1 - [A0A0B4J1R4_HUMAN]	52.67	2	17	17	35	1.00553e+07	1.95904e+07	39.0291	41.22	13	16	49.6217	46.56	14	19	393	44.9359	7.00537
P36543	V-type proton ATPase subunit E 1 OS=Homo sapiens GN=ATP6V1E1 PE=1 SV=1 - [VATE1_HUMAN]	34.51	3	9	9	34	1.2562e+07	1.7881e+07	30.8913	23.89	5	15	43.6566	34.51	8	19	226	26.1288	8.00146
O95954	Formimidoyltransferase-cyclodeaminase OS=Homo sapiens GN=FTCD PE=1 SV=2 - [FTCD_HUMAN]	43.07	4	16	16	31	7.80048e+06	2.0626e+07	26.5408	22.18	10	12	51.3736	39.19	14	19	541	58.8894	5.74463
Q5JR08	Rho-related GTP-binding protein RhoC (Fragment) OS=Homo sapiens GN=RHOC PE=1 SV=8 - [Q5JR08_HUMAN]	39.36	14	1	9	31	8.67102e+06	3.19696e+07	24.4144	39.36	7	12	50.5306	39.36	9	19	188	21.509	6.58057
P09960	Leukotriene A-4 hydrolase OS=Homo sapiens GN=LTA4H PE=1 SV=2 - [LKHA4_HUMAN]	36.99	2	18	18	30	5.54326e+06	1.37544e+07	19.9111	18.17	10	11	39.3058	35.19	16	19	611	69.2412	6.17627
A0A075B7C0	Calpain small subunit 1 (Fragment) OS=Homo sapiens GN=CAPNS1 PE=1 SV=1 - [A0A075B7C0_HUMAN]	70.05	10	10	10	29	4.07256e+06	2.13812e+07	19.3754	22.84	4	10	41.6756	70.05	10	19	197	21.8976	4.86865
P62820	Ras-related protein Rab-1A OS=Homo sapiens GN=RAB1A PE=1 SV=3 - [RAB1A_HUMAN]	51.22	30	6	10	29	1.87959e+07	5.16382e+07	24.6513	44.88	7	10	43.5752	47.32	9	19	205	22.6634	6.21436
P31150	Rab GDP dissociation inhibitor alpha OS=Homo sapiens GN=GDI1 PE=1 SV=2 - [GDIA_HUMAN]	42.51	2	7	16	29	6.76382e+06	1.3172e+07	18.5736	24.38	9	10	49.8277	40.72	14	19	447	50.5501	5.13525
P40121	Macrophage-capping protein OS=Homo sapiens GN=CAPG PE=1 SV=2 - [CAPG_HUMAN]	42.53	4	10	10	28	1.11572e+07	1.95838e+07	20.6493	31.61	6	9	51.6037	36.21	9	19	348	38.4745	6.18896
P17655	Calpain-2 catalytic subunit OS=Homo sapiens GN=CAPN2 PE=1 SV=6 - [CAN2_HUMAN]	31.14	2	14	14	25	2.62268e+06	2.23434e+07	10.6351	11.71	6	6	45.7782	31.14	14	19	700	79.9448	4.98291
P10253	Lysosomal alpha-glucosidase OS=Homo sapiens GN=GAA PE=1 SV=4 - [LYAG_HUMAN]	16.91	3	11	11	25	3.0108e+06	1.79069e+07	11.0419	7.14	5	6	49.0652	16.91	11	19	952	105.257	5.99854
P51858	Hepatoma-derived growth factor OS=Homo sapiens GN=HDGF PE=1 SV=1 - [HDGF_HUMAN]	58.75	4	12	13	23	3.26252e+06	2.55461e+07	4.22242	23.33	4	4	42.5048	58.75	13	19	240	26.7719	4.729
P56199	Integrin alpha-1 OS=Homo sapiens GN=ITGA1 PE=1 SV=2 - [ITA1_HUMAN]	15.35	1	15	15	23	1.40376e+06	8.76357e+06	6.20022	4.41	4	4	36.3482	15.35	15	19	1179	130.765	6.29053
Q9NZM1	Myoferlin OS=Homo sapiens GN=MYOF PE=1 SV=1 - [MYOF_HUMAN]	12.13	2	18	18	19	0	4.78769e+06		0			41.2335	12.13	18	19	2061	234.561	6.17627
Q9ULD0	2-oxoglutarate dehydrogenase-like, mitochondrial OS=Homo sapiens GN=OGDHL PE=1 SV=3 - [OGDHL_HUMAN]	30.4	1	14	24	46	1.08126e+07	1.73035e+07	49.7441	25.15	19	28	32.1415	16.63	15	18	1010	114.409	6.65381
Q01740	Dimethylaniline monooxygenase [N-oxide-forming] 1 OS=Homo sapiens GN=FMO1 PE=1 SV=3 - [FMO1_HUMAN]	43.98	2	17	17	43	1.58733e+07	1.82006e+07	59.6399	41.17	16	25	43.0369	31.02	13	18	532	60.2717	7.1958
P34913	Bifunctional epoxide hydrolase 2 OS=Homo sapiens GN=EPHX2 PE=1 SV=2 - [HYES_HUMAN]	48.65	5	18	18	41	1.42316e+07	1.96594e+07	35.8229	32.97	12	23	45.2725	35.5	13	18	555	62.5747	6.27783
P16219	Short-chain specific acyl-CoA dehydrogenase, mitochondrial OS=Homo sapiens GN=ACADS PE=1 SV=1 - [ACADS_HUMAN]	43.45	2	14	14	40	2.64077e+07	1.75565e+07	49.0539	43.45	14	22	40.6264	37.86	11	18	412	44.2688	7.98682
Q16851	UTP--glucose-1-phosphate uridylyltransferase OS=Homo sapiens GN=UGP2 PE=1 SV=5 - [UGPA_HUMAN]	40.55	14	17	17	38	1.22513e+07	1.96369e+07	39.7244	38.58	15	20	42.1431	28.54	12	18	508	56.9047	8.14795
Q07075	Glutamyl aminopeptidase OS=Homo sapiens GN=ENPEP PE=1 SV=3 - [AMPE_HUMAN]	19.96	2	17	17	37	4.23349e+06	8.90331e+06	36.5194	18.91	16	19	39.7661	16.2	13	18	957	109.176	5.46533
	>sp|ALBU_BOVIN|	17.13	1	6	10	37	5.94696e+08	1.65947e+09	48.6302	15.98	9	19	48.2364	9.06	6	18	607	69.2484	6.17627
A0A0B4J1R2	Acyl-CoA synthetase short-chain family member 3, mitochondrial OS=Homo sapiens GN=ACSS3 PE=1 SV=1 - [A0A0B4J1R2_HUMAN]	35.18	4	19	19	35	7.51761e+06	1.23518e+07	36.5249	26.57	14	17	49.5048	32.12	14	18	685	74.5444	8.63135
Q02978	Mitochondrial 2-oxoglutarate/malate carrier protein OS=Homo sapiens GN=SLC25A11 PE=1 SV=3 - [M2OM_HUMAN]	57.32	2	15	15	31	6.29259e+06	1.03125e+07	27.4399	33.44	9	13	43.7907	52.87	13	18	314	34.0399	9.90576
P10768	S-formylglutathione hydrolase OS=Homo sapiens GN=ESD PE=1 SV=2 - [ESTD_HUMAN]	47.16	4	10	10	31	1.2536e+07	3.43784e+07	25.0018	36.88	8	13	51.1037	39.01	9	18	282	31.4425	7.02002
P52758	Ribonuclease UK114 OS=Homo sapiens GN=HRSP12 PE=1 SV=1 - [UK114_HUMAN]	88.32	3	10	10	29	4.85674e+07	1.05349e+08	24.1906	58.39	6	11	55.9382	88.32	10	18	137	14.4846	8.67529
Q9Y281	Cofilin-2 OS=Homo sapiens GN=CFL2 PE=1 SV=1 - [COF2_HUMAN]	60.24	2	5	12	28	4.32701e+06	2.98037e+07	19.4325	46.99	8	10	49.0381	46.99	10	18	166	18.7249	7.88428
P06727	Apolipoprotein A-IV OS=Homo sapiens GN=APOA4 PE=1 SV=3 - [APOA4_HUMAN]	44.7	1	16	16	28	4.53315e+06	1.35511e+07	12.869	26.52	9	10	37.4213	42.68	15	18	396	45.3715	5.37646
D6RAT0	40S ribosomal protein S3a OS=Homo sapiens GN=RPS3A PE=1 SV=1 - [D6RAT0_HUMAN]	53.74	12	13	13	27	4.31063e+06	1.19198e+07	17.157	42.73	8	9	40.8482	53.74	13	18	227	25.8704	9.42236
P60900	Proteasome subunit alpha type-6 OS=Homo sapiens GN=PSMA6 PE=1 SV=1 - [PSA6_HUMAN]	47.56	8	12	12	27	5.99065e+06	1.70037e+07	23.7431	35.77	7	9	42.9769	47.56	11	18	246	27.3818	6.75635
P02760	Protein AMBP OS=Homo sapiens GN=AMBP PE=1 SV=1 - [AMBP_HUMAN]	44.32	3	14	14	27	6.87828e+06	1.9548e+07	15.3734	22.44	7	9	44.7116	44.32	14	18	352	38.974	6.25244
B1AK87	Capping protein (Actin filament) muscle Z-line, beta, isoform CRA_a OS=Homo sapiens GN=CAPZB PE=1 SV=1 - [B1AK87_HUMAN]	38.08	4	10	10	27	9.83027e+06	2.3262e+07	18.7425	23.85	7	9	40.3077	38.08	10	18	260	29.2768	6.91748
P08574	Cytochrome c1, heme protein, mitochondrial OS=Homo sapiens GN=CYC1 PE=1 SV=3 - [CY1_HUMAN]	35.38	1	9	9	27	1.1418e+07	4.59506e+07	20.8445	25.85	6	9	44.9414	33.23	8	18	325	35.399	8.99756
A0A087WTT1	Polyadenylate-binding protein OS=Homo sapiens GN=PABPC1 PE=1 SV=1 - [A0A087WTT1_HUMAN]	32.95	19	11	16	27	4.26694e+06	1.17338e+07	16.7785	19.92	9	9	35.9697	30.27	14	18	522	58.4988	9.26123
Q9Y4W6	AFG3-like protein 2 OS=Homo sapiens GN=AFG3L2 PE=1 SV=2 - [AFG32_HUMAN]	24.47	2	15	16	27	3.12597e+06	1.13139e+07	19.6091	12.67	9	9	42.1167	23.21	14	18	797	88.5282	8.66064
E9PLK3	Aminopeptidase OS=Homo sapiens GN=NPEPPS PE=1 SV=1 - [E9PLK3_HUMAN]	25.36	9	14	14	26	2.62798e+06	9.18655e+06	10.6794	7.54	6	8	36.7615	24.26	13	18	915	102.922	5.60498
P25786	Proteasome subunit alpha type-1 OS=Homo sapiens GN=PSMA1 PE=1 SV=1 - [PSA1_HUMAN]	51.71	3	14	14	25	5.21799e+06	1.74627e+07	12.5958	27.38	6	7	42.7539	51.71	14	18	263	29.5369	6.60986
O14818	Proteasome subunit alpha type-7 OS=Homo sapiens GN=PSMA7 PE=1 SV=1 - [PSA7_HUMAN]	51.21	5	10	10	25	5.74001e+06	2.06747e+07	13.7709	37.1	7	7	48.2245	51.21	10	18	248	27.8696	8.45557
P08729	Keratin, type II cytoskeletal 7 OS=Homo sapiens GN=KRT7 PE=1 SV=5 - [K2C7_HUMAN]	27.72	28	10	16	23	6.61859e+06	3.33431e+07	8.01549	9.17	5	5	41.4152	27.72	15	18	469	51.3543	5.47803
P55809	Succinyl-CoA:3-ketoacid coenzyme A transferase 1, mitochondrial OS=Homo sapiens GN=OXCT1 PE=1 SV=1 - [SCOT1_HUMAN]	25.58	3	9	9	22	2.7864e+06	3.65965e+07	2.28342	4.62	2	4	42.1145	25.58	9	18	520	56.1219	7.45947
Q12906	Interleukin enhancer-binding factor 3 OS=Homo sapiens GN=ILF3 PE=1 SV=3 - [ILF3_HUMAN]	20.81	12	15	15	22	2.42698e+06	7.8565e+06	9.49869	4.81	4	4	33.9118	20.81	15	18	894	95.2791	8.76318
H0YM31	Phosphoenolpyruvate carboxykinase [GTP], mitochondrial OS=Homo sapiens GN=PCK2 PE=1 SV=2 - [H0YM31_HUMAN]	64.83	6	1	26	76	8.93189e+07	2.06477e+07	147.763	58.74	25	59	31.9326	41.26	13	17	509	54.6093	7.75244
O43175	D-3-phosphoglycerate dehydrogenase OS=Homo sapiens GN=PHGDH PE=1 SV=4 - [SERA_HUMAN]	46.34	2	18	18	42	1.98179e+07	1.32409e+07	67.5479	39.77	16	25	40.6173	38.09	14	17	533	56.6144	6.7124
A0A087WU25	Acyl-coenzyme A synthetase ACSM2B, mitochondrial (Fragment) OS=Homo sapiens GN=ACSM2B PE=1 SV=1 - [A0A087WU25_HUMAN]	65	1	1	10	38	5.58508e+07	4.1347e+07	48.7422	53.5	8	21	38.6524	56	8	17	200	21.9111	6.30322
Q14019	Coactosin-like protein OS=Homo sapiens GN=COTL1 PE=1 SV=3 - [COTL1_HUMAN]	86.62	2	14	14	34	3.89792e+07	3.91053e+07	35.2569	70.42	11	17	45.7931	79.58	12	17	142	15.935	5.66846
O00299	Chloride intracellular channel protein 1 OS=Homo sapiens GN=CLIC1 PE=1 SV=4 - [CLIC1_HUMAN]	66.39	1	16	16	31	1.39403e+07	4.55658e+07	32.4397	50.21	11	14	46.0611	61.83	14	17	241	26.9057	5.17334
O75489	NADH dehydrogenase [ubiquinone] iron-sulfur protein 3, mitochondrial OS=Homo sapiens GN=NDUFS3 PE=1 SV=1 - [NDUS3_HUMAN]	43.94	4	12	12	30	8.82787e+06	1.98944e+07	34.1161	41.29	10	13	43.9787	43.94	12	17	264	30.2227	7.50342
P13716	Delta-aminolevulinic acid dehydratase OS=Homo sapiens GN=ALAD PE=1 SV=1 - [HEM2_HUMAN]	34.24	2	10	10	30	4.84404e+06	1.07301e+07	28.0525	28.18	8	13	40.7608	34.24	9	17	330	36.2714	6.78564
P42126	Enoyl-CoA delta isomerase 1, mitochondrial OS=Homo sapiens GN=ECI1 PE=1 SV=1 - [ECI1_HUMAN]	30.46	3	7	7	30	2.07694e+07	7.91221e+07	28.4715	24.17	6	13	56.0348	30.46	7	17	302	32.7952	8.54346
P21291	Cysteine and glycine-rich protein 1 OS=Homo sapiens GN=CSRP1 PE=1 SV=3 - [CSRP1_HUMAN]	67.36	4	11	11	29	2.25243e+07	5.22654e+07	30.8951	64.77	9	12	45.025	67.36	10	17	193	20.5538	8.57275
P51888	Prolargin OS=Homo sapiens GN=PRELP PE=1 SV=1 - [PRELP_HUMAN]	34.29	1	10	10	29	7.0547e+06	2.04585e+07	24.6809	27.75	8	12	36.3368	29.32	9	17	382	43.7822	9.37842
Q6XQN6	Nicotinate phosphoribosyltransferase OS=Homo sapiens GN=NAPRT PE=1 SV=2 - [PNCB_HUMAN]	49.44	6	16	16	28	7.3594e+06	1.46927e+07	22.8589	24.72	10	11	43.6958	46.84	14	17	538	57.542	5.68115
Q9UKU7	Isobutyryl-CoA dehydrogenase, mitochondrial OS=Homo sapiens GN=ACAD8 PE=1 SV=1 - [ACAD8_HUMAN]	46.75	2	15	16	28	6.29274e+06	3.90811e+07	27.0913	29.16	10	11	38.326	42.17	14	17	415	45.0405	7.85498
P04004	Vitronectin OS=Homo sapiens GN=VTN PE=1 SV=1 - [VTNC_HUMAN]	29.71	2	10	10	28	1.06553e+07	2.77546e+07	20.0648	19.87	7	11	43.6716	27.2	9	17	478	54.2712	5.79541
P19224	UDP-glucuronosyltransferase 1-6 OS=Homo sapiens GN=UGT1A6 PE=1 SV=2 - [UD16_HUMAN]	19.55	8	3	9	28	1.22776e+07	2.34362e+07	20.2316	12.59	7	11	42.7412	16.73	8	17	532	60.7112	8.41162
Q9UF12	Hydroxyproline dehydrogenase OS=Homo sapiens GN=PRODH2 PE=1 SV=1 - [HYPDH_HUMAN]	34.7	3	13	13	27	1.14845e+07	2.78205e+07	24.4578	21.08	8	10	41.4389	34.7	12	17	536	58.8333	8.60205
P62834	Ras-related protein Rap-1A OS=Homo sapiens GN=RAP1A PE=1 SV=1 - [RAP1A_HUMAN]	67.39	11	3	11	26	1.08162e+07	2.88727e+07	16.9884	27.72	6	9	39.8643	67.39	11	17	184	20.9737	6.66846
A6NLN1	Polypyrimidine tract binding protein 1, isoform CRA_b OS=Homo sapiens GN=PTBP1 PE=1 SV=4 - [A6NLN1_HUMAN]	28.84	13	10	10	26	2.55253e+06	2.25735e+07	16.2482	20.3	7	9	36.2861	25.05	9	17	527	56.4753	9.37842
O75746	Calcium-binding mitochondrial carrier protein Aralar1 OS=Homo sapiens GN=SLC25A12 PE=1 SV=2 - [CMC1_HUMAN]	26.84	4	9	14	26	7.20871e+06	1.28933e+07	16.4923	14.45	8	9	41.456	26.84	14	17	678	74.7149	8.38232
Q8NBS9	Thioredoxin domain-containing protein 5 OS=Homo sapiens GN=TXNDC5 PE=1 SV=2 - [TXND5_HUMAN]	34.95	1	12	12	24	4.39961e+06	1.53246e+07	10.0826	22.92	7	7	32.4179	34.95	12	17	432	47.5987	5.97314
P10515	Dihydrolipoyllysine-residue acetyltransferase component of pyruvate dehydrogenase complex, mitochondrial OS=Homo sapiens GN=DLAT PE=1 SV=3 - [ODP2_HUMAN]	34.16	3	16	16	24	7.63966e+06	2.11619e+07	17.8255	12.52	7	7	35.331	34.16	16	17	647	68.9531	7.84033
P09936	Ubiquitin carboxyl-terminal hydrolase isozyme L1 OS=Homo sapiens GN=UCHL1 PE=1 SV=2 - [UCHL1_HUMAN]	60.09	5	11	11	23	4.74231e+06	4.27314e+07	16.2592	24.22	4	6	45.997	60.09	11	17	223	24.8085	5.47803
Q92947	Glutaryl-CoA dehydrogenase, mitochondrial OS=Homo sapiens GN=GCDH PE=1 SV=1 - [GCDH_HUMAN]	28.54	4	8	8	23	5.62188e+06	1.98764e+07	12.6661	15.75	4	6	40.3362	28.54	8	17	438	48.0964	8.06006
P19404	NADH dehydrogenase [ubiquinone] flavoprotein 2, mitochondrial OS=Homo sapiens GN=NDUFV2 PE=1 SV=2 - [NDUV2_HUMAN]	43.37	2	9	9	22	6.61477e+06	2.68477e+07	9.17279	27.31	5	5	37.114	43.37	9	17	249	27.374	8.06006
P63096	Guanine nucleotide-binding protein G(i) subunit alpha-1 OS=Homo sapiens GN=GNAI1 PE=1 SV=2 - [GNAI1_HUMAN]	42.94	13	5	12	22	1.09274e+07	3.20198e+07	10.6512	11.3	3	5	32.1843	42.94	12	17	354	40.3352	5.97314
P19367	Hexokinase-1 OS=Homo sapiens GN=HK1 PE=1 SV=3 - [HXK1_HUMAN]	21.37	4	14	16	21	1.92297e+06	8.54897e+06	5.26061	3.16	3	4	36.954	20.28	15	17	917	102.42	6.80029
P19827	Inter-alpha-trypsin inhibitor heavy chain H1 OS=Homo sapiens GN=ITIH1 PE=1 SV=3 - [ITIH1_HUMAN]	23.05	4	12	12	19	2.01464e+06	1.17345e+07	4.87346	4.06	2	2	29.9678	23.05	12	17	911	101.326	6.78564
A0A087WV24	Aromatic-L-amino-acid decarboxylase OS=Homo sapiens GN=DDC PE=1 SV=1 - [A0A087WV24_HUMAN]	48.19	5	16	16	42	3.6419e+07	2.36257e+07	68.278	40.27	15	26	41.929	37.56	11	16	442	49.6654	7.32764
Q12931	Heat shock protein 75 kDa, mitochondrial OS=Homo sapiens GN=TRAP1 PE=1 SV=3 - [TRAP1_HUMAN]	27.27	5	15	16	34	3.53536e+07	7.49133e+07	45.3851	23.72	13	18	45.3177	17.05	11	16	704	80.0597	8.20654
P15531	Nucleoside diphosphate kinase A OS=Homo sapiens GN=NME1 PE=1 SV=1 - [NDKA_HUMAN]	59.21	4	1	8	31	2.52225e+07	6.12453e+07	36.6855	59.21	8	15	41.9778	58.55	7	16	152	17.1377	6.18896
O00264	Membrane-associated progesterone receptor component 1 OS=Homo sapiens GN=PGRMC1 PE=1 SV=3 - [PGRC1_HUMAN]	49.23	1	9	10	31	1.6883e+07	3.584e+07	39.3407	47.69	9	15	38.3889	48.21	9	16	195	21.6578	4.70361
P53396	ATP-citrate synthase OS=Homo sapiens GN=ACLY PE=1 SV=3 - [ACLY_HUMAN]	22.34	3	19	19	31	4.21554e+06	7.91292e+06	27.1542	15.71	14	15	33.9302	17.8	15	16	1101	120.762	7.32764
H7BZJ3	Protein disulfide-isomerase A3 (Fragment) OS=Homo sapiens GN=PDIA3 PE=1 SV=1 - [H7BZJ3_HUMAN]	57.72	1	1	8	28	2.84511e+07	7.08813e+07	26.3238	40.65	5	12	42.2302	57.72	8	16	123	13.5108	7.29834
Q96AB3	Isochorismatase domain-containing protein 2 OS=Homo sapiens GN=ISOC2 PE=1 SV=1 - [ISOC2_HUMAN]	84.88	3	9	9	27	8.48611e+06	3.98849e+07	23.4645	59.02	6	11	45.1039	84.88	9	16	205	22.3228	7.76709
P61224	Ras-related protein Rap-1b OS=Homo sapiens GN=RAP1B PE=1 SV=1 - [RAP1B_HUMAN]	53.26	20	3	11	27	1.11351e+07	3.10929e+07	22.3015	42.93	8	11	38.8305	53.26	10	16	184	20.8116	5.78271
P13861	cAMP-dependent protein kinase type II-alpha regulatory subunit OS=Homo sapiens GN=PRKAR2A PE=1 SV=2 - [KAP2_HUMAN]	49.75	5	14	16	27	3.63984e+06	1.13556e+07	16.7963	29.21	9	11	40.9048	40.84	13	16	404	45.49	5.07178
B7ZAR1	T-complex protein 1 subunit epsilon OS=Homo sapiens GN=CCT5 PE=1 SV=1 - [B7ZAR1_HUMAN]	35.19	4	14	14	27	2.2566e+06	8.84199e+06	16.1396	22.66	9	11	33.8933	30.62	12	16	503	55.3136	5.47803
P49773	Histidine triad nucleotide-binding protein 1 OS=Homo sapiens GN=HINT1 PE=1 SV=2 - [HINT1_HUMAN]	79.37	5	7	7	26	1.51398e+07	3.6601e+07	20.8012	73.81	5	10	46.8273	79.37	7	16	126	13.7931	6.94678
P51149	Ras-related protein Rab-7a OS=Homo sapiens GN=RAB7A PE=1 SV=1 - [RAB7A_HUMAN]	68.6	7	13	13	26	8.31006e+06	1.50627e+07	19.6359	46.38	8	10	32.2906	63.29	12	16	207	23.4748	6.69775
I3L397	Eukaryotic translation initiation factor 5A (Fragment) OS=Homo sapiens GN=EIF5A PE=1 SV=8 - [I3L397_HUMAN]	54.11	8	11	11	26	3.64264e+06	1.75176e+07	18.858	38.36	7	10	35.4398	54.11	10	16	146	16.0089	4.99561
Q9UJZ1	Stomatin-like protein 2, mitochondrial OS=Homo sapiens GN=STOML2 PE=1 SV=1 - [STML2_HUMAN]	41.57	3	10	10	25	4.57774e+06	1.92386e+07	19.9962	25.56	6	9	45.7692	41.57	10	16	356	38.5102	7.38623
P61160	Actin-related protein 2 OS=Homo sapiens GN=ACTR2 PE=1 SV=1 - [ARP2_HUMAN]	32.49	4	10	10	25	7.10186e+06	1.62633e+07	22.6377	21.83	7	9	39.0629	29.19	8	16	394	44.7322	6.7417
P63010	AP-2 complex subunit beta OS=Homo sapiens GN=AP2B1 PE=1 SV=1 - [AP2B1_HUMAN]	21.24	12	10	19	25	4.36718e+06	1.06952e+07	18.2596	10.57	9	9	32.4223	18.36	16	16	937	104.486	5.37646
Q14195	Dihydropyrimidinase-related protein 3 OS=Homo sapiens GN=DPYSL3 PE=1 SV=1 - [DPYL3_HUMAN]	29.65	4	7	11	23	6.11159e+06	1.9753e+07	12.0824	5.26	3	7	32.2199	29.65	11	16	570	61.9241	6.49365
O75306	NADH dehydrogenase [ubiquinone] iron-sulfur protein 2, mitochondrial OS=Homo sapiens GN=NDUFS2 PE=1 SV=2 - [NDUS2_HUMAN]	30.89	1	10	10	22	6.19224e+06	1.73818e+07	11.4177	11.66	4	6	35.5188	30.89	10	16	463	52.5117	7.54736
P80723	Brain acid soluble protein 1 OS=Homo sapiens GN=BASP1 PE=1 SV=2 - [BASP1_HUMAN]	77.09	2	9	9	21	3.602e+06	1.18072e+07	12.4208	25.99	3	5	32.2302	77.09	9	16	227	22.68	4.62744
E7EX90	Dynactin subunit 1 OS=Homo sapiens GN=DCTN1 PE=1 SV=1 - [E7EX90_HUMAN]	17.83	10	16	16	21	2.0844e+06	4.98817e+06	11.8217	4.86	5	5	30.7623	15.68	14	16	1256	139.008	5.66846
A1L0T0	Acetolactate synthase-like protein OS=Homo sapiens GN=ILVBL PE=1 SV=2 - [ILVBL_HUMAN]	36.23	6	12	12	20	3.14209e+06	1.40845e+07	11.361	10.92	4	4	45.4808	36.23	12	16	632	67.8248	8.14795
P50454	Serpin H1 OS=Homo sapiens GN=SERPINH1 PE=1 SV=2 - [SERPH_HUMAN]	34.69	13	11	11	20	1.44861e+06	8.88704e+06	4.76561	14.59	4	4	39.4564	34.69	11	16	418	46.4112	8.68994
Q5T985	Inter-alpha-trypsin inhibitor heavy chain H2 OS=Homo sapiens GN=ITIH2 PE=1 SV=1 - [Q5T985_HUMAN]	15.08	3	12	12	19	1.26324e+06	1.38918e+07	2.32399	4.6	3	3	40.9757	15.08	12	16	935	105.15	7.03467
P09327	Villin-1 OS=Homo sapiens GN=VIL1 PE=1 SV=4 - [VILI_HUMAN]	39.9	4	25	25	44	7.89761e+06	6.58301e+06	53.8215	35.67	22	29	34.3451	25.88	15	15	827	92.6367	6.39209
Q9H9B4	Sideroflexin-1 OS=Homo sapiens GN=SFXN1 PE=1 SV=4 - [SFXN1_HUMAN]	42.55	5	11	13	37	1.7666e+07	2.49442e+07	48.0432	42.55	13	22	39.4095	36.02	10	15	322	35.5963	9.0708
Q15067	Peroxisomal acyl-coenzyme A oxidase 1 OS=Homo sapiens GN=ACOX1 PE=1 SV=3 - [ACOX1_HUMAN]	36.97	7	17	17	35	9.25109e+06	1.13666e+07	34.5208	30.91	15	20	24.9763	28.33	11	15	660	74.3762	8.1626
Q9NUJ1	Mycophenolic acid acyl-glucuronide esterase, mitochondrial OS=Homo sapiens GN=ABHD10 PE=1 SV=1 - [ABHDA_HUMAN]	55.23	1	12	12	28	8.05994e+06	1.76937e+07	24.389	49.02	10	13	40.8731	45.75	9	15	306	33.9107	8.57275
Q15274	Nicotinate-nucleotide pyrophosphorylase [carboxylating] OS=Homo sapiens GN=QPRT PE=1 SV=3 - [NADC_HUMAN]	49.49	3	11	11	28	6.1574e+06	2.87732e+07	28.8742	32.32	8	13	42.8107	49.16	10	15	297	30.8261	6.21436
P07585	Decorin OS=Homo sapiens GN=DCN PE=1 SV=1 - [PGS2_HUMAN]	35.93	11	10	11	27	1.57316e+07	2.20117e+07	26.8834	27.3	8	12	34.692	32.31	10	15	359	39.7218	8.54346
Q9H4A4	Aminopeptidase B OS=Homo sapiens GN=RNPEP PE=1 SV=2 - [AMPB_HUMAN]	31.85	5	14	14	27	3.70065e+06	1.7347e+07	22.7206	19.54	10	12	32.6477	27.85	11	15	650	72.5495	5.74463
E5KLK1	Dynamin-like 120 kDa protein, mitochondrial OS=Homo sapiens GN=OPA1 PE=1 SV=1 - [E5KLK1_HUMAN]	23.1	8	18	18	27	2.37806e+06	5.18737e+06	17.563	14.05	12	12	36.0893	19.15	15	15	961	111.752	7.98682
Q9UIJ7	GTP:AMP phosphotransferase AK3, mitochondrial OS=Homo sapiens GN=AK3 PE=1 SV=4 - [KAD3_HUMAN]	51.1	1	11	11	26	8.78011e+06	1.91111e+07	19.8506	44.49	8	11	33.9776	51.1	11	15	227	25.5495	9.15869
E9PIE4	Mitochondrial carrier homolog 2 (Fragment) OS=Homo sapiens GN=MTCH2 PE=1 SV=8 - [E9PIE4_HUMAN]	42.37	1	1	10	26	1.00351e+07	2.74245e+07	22.8219	33.97	8	11	41.7987	42.37	10	15	262	28.5305	7.60596
J3KTF8	Rho GDP-dissociation inhibitor 1 (Fragment) OS=Homo sapiens GN=ARHGDIA PE=1 SV=8 - [J3KTF8_HUMAN]	25.39	6	6	6	26	9.96726e+06	5.53911e+07	23.6389	23.83	5	11	46.1318	25.39	6	15	193	21.504	5.49072
Q92841	Probable ATP-dependent RNA helicase DDX17 OS=Homo sapiens GN=DDX17 PE=1 SV=2 - [DDX17_HUMAN]	24.97	3	9	15	26	3.52341e+06	8.52388e+06	19.9104	14.81	10	11	33.5415	22.63	13	15	729	80.222	8.26514
P47755	F-actin-capping protein subunit alpha-2 OS=Homo sapiens GN=CAPZA2 PE=1 SV=3 - [CAZA2_HUMAN]	73.43	4	10	13	25	8.49592e+06	3.75361e+07	26.3478	44.06	8	10	42.35	67.48	12	15	286	32.9286	5.84619
P51148	Ras-related protein Rab-5C OS=Homo sapiens GN=RAB5C PE=1 SV=2 - [RAB5C_HUMAN]	50.93	13	7	8	25	1.1798e+07	1.68919e+07	20.3687	31.02	6	10	39.0496	50.93	8	15	216	23.4678	8.41162
A0A087WXC5	NADH dehydrogenase [ubiquinone] 1 alpha subcomplex subunit 10, mitochondrial OS=Homo sapiens GN=NDUFA10 PE=1 SV=1 - [A0A087WXC5_HUMAN]	35.77	8	9	9	25	7.51746e+06	2.21801e+07	22.0527	35.77	8	10	35.9228	35.77	9	15	355	40.811	8.48486
P50995	Annexin A11 OS=Homo sapiens GN=ANXA11 PE=1 SV=1 - [ANX11_HUMAN]	34.85	2	12	13	25	4.00184e+06	1.47131e+07	19.3904	19.21	8	10	39.656	25.35	10	15	505	54.3551	7.6499
C9J9K3	40S ribosomal protein SA (Fragment) OS=Homo sapiens GN=RPSA PE=1 SV=8 - [C9J9K3_HUMAN]	60.08	4	11	11	24	1.42103e+07	3.17732e+07	22.4663	34.6	6	9	41.0221	60.08	10	15	263	29.386	5.24951
O95336	6-phosphogluconolactonase OS=Homo sapiens GN=PGLS PE=1 SV=2 - [6PGL_HUMAN]	45.74	4	9	9	24	5.51644e+06	1.85672e+07	19.4711	37.98	7	9	39.5403	45.74	9	15	258	27.5296	6.04932
P60953	Cell division control protein 42 homolog OS=Homo sapiens GN=CDC42 PE=1 SV=2 - [CDC42_HUMAN]	44.5	8	8	9	24	9.04439e+06	2.47391e+07	20.8796	31.41	5	9	39.9393	44.5	9	15	191	21.245	6.55127
P69891	Hemoglobin subunit gamma-1 OS=Homo sapiens GN=HBG1 PE=1 SV=2 - [HBG1_HUMAN]	43.54	3	1	5	24	1.50026e+09	8.12654e+08	14.8577	6.8	1	9	38.0496	43.54	5	15	147	16.1303	7.1958
Q9NX63	MICOS complex subunit MIC19 OS=Homo sapiens GN=CHCHD3 PE=1 SV=1 - [MIC19_HUMAN]	42.73	4	10	10	24	8.78565e+06	1.82194e+07	19.7252	38.33	7	9	38.0402	42.73	10	15	227	26.1362	8.27979
Q92820	Gamma-glutamyl hydrolase OS=Homo sapiens GN=GGH PE=1 SV=2 - [GGH_HUMAN]	40.57	1	11	11	24	1.3566e+07	1.08828e+07	23.0462	19.5	6	9	35.5854	40.57	11	15	318	35.9412	7.10791
O94826	Mitochondrial import receptor subunit TOM70 OS=Homo sapiens GN=TOMM70 PE=1 SV=1 - [TOM70_HUMAN]	33.22	1	13	13	24	3.24824e+06	9.38147e+06	15.6226	17.93	8	9	30.2859	25.66	11	15	608	67.412	7.12256
P51648	Fatty aldehyde dehydrogenase OS=Homo sapiens GN=ALDH3A2 PE=1 SV=1 - [AL3A2_HUMAN]	28.66	20	14	14	24	7.00534e+06	1.10467e+07	18.2051	18.97	7	9	37.5867	23.51	12	15	485	54.8129	7.88428
Q9UL46	Proteasome activator complex subunit 2 OS=Homo sapiens GN=PSME2 PE=1 SV=4 - [PSME2_HUMAN]	48.95	4	10	10	23	2.12045e+06	1.06833e+07	17.9188	33.05	6	8	36.8679	48.95	10	15	239	27.3843	5.73193
P00403	Cytochrome c oxidase subunit 2 OS=Homo sapiens GN=MT-CO2 PE=1 SV=1 - [COX2_HUMAN]	40.97	1	7	7	23	3.44837e+07	7.41507e+07	19.269	20.7	4	8	41.2961	40.97	7	15	227	25.5482	4.81787
O43865	S-adenosylhomocysteine hydrolase-like protein 1 OS=Homo sapiens GN=AHCYL1 PE=1 SV=2 - [SAHH2_HUMAN]	28.3	1	6	12	23	2.53152e+06	8.55052e+06	19.2845	11.89	6	8	28.6665	28.3	11	15	530	58.9134	6.88818
Q7KZF4	Staphylococcal nuclease domain-containing protein 1 OS=Homo sapiens GN=SND1 PE=1 SV=1 - [SND1_HUMAN]	24.18	2	14	14	23	3.08779e+06	6.79145e+06	17.8347	9.12	7	8	28.5514	23.3	13	15	910	101.934	7.1665
Q96HD9	N-acyl-aromatic-L-amino acid amidohydrolase (carboxylate-forming) OS=Homo sapiens GN=ACY3 PE=1 SV=1 - [ACY3_HUMAN]	48.59	2	10	10	22	4.26856e+06	1.93324e+07	14.6364	28.84	6	7	36.8389	48.59	10	15	319	35.2185	5.89697
P29692	Elongation factor 1-delta OS=Homo sapiens GN=EEF1D PE=1 SV=5 - [EF1D_HUMAN]	42.35	18	4	10	22	7.8788e+06	3.08081e+07	20.61	30.6	6	7	36.0908	42.35	10	15	281	31.1028	5.0083
Q13838	Spliceosome RNA helicase DDX39B OS=Homo sapiens GN=DDX39B PE=1 SV=1 - [DX39B_HUMAN]	38.08	34	13	13	22	4.62387e+06	1.43554e+07	10.0004	22.43	6	7	33.1002	33.41	12	15	428	48.9599	5.66846
P13798	Acylamino-acid-releasing enzyme OS=Homo sapiens GN=APEH PE=1 SV=4 - [ACPH_HUMAN]	33.74	7	16	16	22	5.34158e+06	1.27948e+07	14.3124	13.39	7	7	36.2733	32.79	15	15	732	81.1726	5.47803
Q06278	Aldehyde oxidase OS=Homo sapiens GN=AOX1 PE=1 SV=2 - [AOXA_HUMAN]	17.49	2	16	16	22	1.83881e+06	5.09085e+06	8.9919	7.32	7	7	26.8561	14.2	12	15	1338	147.822	7.1665
O95865	N(G),N(G)-dimethylarginine dimethylaminohydrolase 2 OS=Homo sapiens GN=DDAH2 PE=1 SV=1 - [DDAH2_HUMAN]	51.58	5	8	9	21	6.45879e+06	1.79407e+07	13.9039	18.25	4	6	36.4629	51.58	9	15	285	29.6255	6.01123
Q10567	AP-1 complex subunit beta-1 OS=Homo sapiens GN=AP1B1 PE=1 SV=2 - [AP1B1_HUMAN]	18.55	4	7	16	21	4.09826e+06	1.04123e+07	9.70697	6.85	6	6	26.4592	15.91	14	15	949	104.57	5.05908
O60664	Perilipin-3 OS=Homo sapiens GN=PLIN3 PE=1 SV=3 - [PLIN3_HUMAN]	38.71	4	11	11	20	1.58562e+06	7.56204e+06	8.12484	15.44	5	5	35.7648	38.71	11	15	434	47.0459	5.43994
H0YJ34	Fermitin family homolog 2 (Fragment) OS=Homo sapiens GN=FERMT2 PE=1 SV=1 - [H0YJ34_HUMAN]	30.31	7	12	12	20	2.8021e+06	1.41478e+07	7.23699	14.06	5	5	36.0936	27.81	11	15	640	73.3064	6.97607
P16615	Sarcoplasmic/endoplasmic reticulum calcium ATPase 2 OS=Homo sapiens GN=ATP2A2 PE=1 SV=1 - [AT2A2_HUMAN]	16.79	5	13	13	20	1.93777e+06	6.98248e+06	8.1817	7.29	5	5	29.2065	16.79	13	15	1042	114.683	5.33838
P05455	Lupus La protein OS=Homo sapiens GN=SSB PE=1 SV=2 - [LA_HUMAN]	35.78	4	12	12	19	1.89316e+06	1.06301e+07	11.7087	13.97	4	4	43.3001	35.78	12	15	408	46.8082	7.12256
Q5JXI8	Four and a half LIM domains protein 1 (Fragment) OS=Homo sapiens GN=FHL1 PE=1 SV=1 - [Q5JXI8_HUMAN]	52.92	15	10	10	18	1.19066e+06	1.52495e+07	1.84458	13.62	3	3	29.2489	52.92	10	15	257	29.1405	8.26514
P01833	Polymeric immunoglobulin receptor OS=Homo sapiens GN=PIGR PE=1 SV=4 - [PIGR_HUMAN]	25.13	1	15	15	18	1.62231e+06	1.26753e+07	4.40431	4.45	3	3	43.554	22.77	13	15	764	83.2317	5.74463
Q9H3G5	Probable serine carboxypeptidase CPVL OS=Homo sapiens GN=CPVL PE=1 SV=2 - [CPVL_HUMAN]	23.53	6	11	11	18	2.35748e+06	1.16572e+07	7.5883	6.72	3	3	29.3726	20.59	10	15	476	54.1291	5.61768
P02751	Fibronectin OS=Homo sapiens GN=FN1 PE=1 SV=4 - [FINC_HUMAN]	7.96	2	13	13	17	580579	5.41059e+06	2.13035	1.09	2	2	25.0493	7.96	13	15	2386	262.46	5.70654
P54868	Hydroxymethylglutaryl-CoA synthase, mitochondrial OS=Homo sapiens GN=HMGCS2 PE=1 SV=1 - [HMCS2_HUMAN]	58.86	2	32	32	116	3.74873e+08	1.19786e+07	316.524	58.86	32	102	35.1593	27.76	10	14	508	56.5994	8.1626
O00748	Cocaine esterase OS=Homo sapiens GN=CES2 PE=1 SV=1 - [EST2_HUMAN]	40.61	7	18	18	36	1.50655e+07	1.69173e+07	46.4975	34.35	16	22	32.7351	26.65	10	14	559	61.7672	6.1001
P22307	Non-specific lipid-transfer protein OS=Homo sapiens GN=SCP2 PE=1 SV=2 - [NLTP_HUMAN]	26.51	5	15	15	35	2.11868e+07	3.00567e+07	45.261	24.31	13	21	34.6488	13.71	9	14	547	58.9556	6.88818
Q9Y2T3	Guanine deaminase OS=Homo sapiens GN=GDA PE=1 SV=1 - [GUAD_HUMAN]	46.04	3	4	14	33	1.09455e+07	1.39568e+07	37.1402	41.85	13	19	35.0285	31.06	9	14	454	50.9706	5.68115
Q14894	Ketimine reductase mu-crystallin OS=Homo sapiens GN=CRYM PE=1 SV=1 - [CRYM_HUMAN]	38.54	5	9	9	30	1.65779e+07	2.55649e+07	36.67	38.54	9	16	36.8817	38.54	9	14	314	33.7544	5.13525
O60749	Sorting nexin-2 OS=Homo sapiens GN=SNX2 PE=1 SV=2 - [SNX2_HUMAN]	30.83	2	13	15	30	7.14896e+06	1.41847e+07	33.4616	28.32	13	16	41.8312	21.58	11	14	519	58.4347	5.12256
P62241	40S ribosomal protein S8 OS=Homo sapiens GN=RPS8 PE=1 SV=2 - [RS8_HUMAN]	60.1	2	12	12	28	8.98261e+06	1.58036e+07	23.0539	58.65	11	14	27.8937	49.04	10	14	208	24.1902	10.3159
G3V2V8	Epididymal secretory protein E1 (Fragment) OS=Homo sapiens GN=NPC2 PE=1 SV=1 - [G3V2V8_HUMAN]	58.2	7	8	8	28	2.8145e+07	6.8888e+07	43.544	58.2	8	14	45.1758	58.2	8	14	122	13.0697	8.33838
Q92499	ATP-dependent RNA helicase DDX1 OS=Homo sapiens GN=DDX1 PE=1 SV=2 - [DDX1_HUMAN]	32.57	3	16	16	28	3.01764e+06	6.67956e+06	19.5489	25.54	12	14	32.6471	26.49	13	14	740	82.3798	7.2251
P49588	Alanine--tRNA ligase, cytoplasmic OS=Homo sapiens GN=AARS PE=1 SV=2 - [SYAC_HUMAN]	21.38	2	14	14	27	2.53647e+06	4.66415e+06	18.612	11.88	9	13	21.9322	16.74	10	14	968	106.743	5.52881
P26641	Elongation factor 1-gamma OS=Homo sapiens GN=EEF1G PE=1 SV=3 - [EF1G_HUMAN]	33.18	1	13	13	26	9.36681e+06	1.90828e+07	27.7143	23.34	8	12	30.4362	25.63	10	14	437	50.0871	6.66846
Q9UI12	V-type proton ATPase subunit H OS=Homo sapiens GN=ATP6V1H PE=1 SV=1 - [VATH_HUMAN]	28.57	7	11	11	26	7.80435e+06	2.02439e+07	21.0577	26.29	9	12	31.0036	26.71	10	14	483	55.8471	6.48096
Q02790	Peptidyl-prolyl cis-trans isomerase FKBP4 OS=Homo sapiens GN=FKBP4 PE=1 SV=3 - [FKBP4_HUMAN]	43.57	3	14	14	25	3.99071e+06	8.95888e+06	13.3635	20.7	7	11	26.0522	34.64	11	14	459	51.7721	5.42725
Q9UHG3	Prenylcysteine oxidase 1 OS=Homo sapiens GN=PCYOX1 PE=1 SV=3 - [PCYOX_HUMAN]	38.22	5	12	12	25	3.91803e+06	7.15651e+06	25.0141	29.9	10	11	37.7919	36.44	11	14	505	56.6037	6.17627
P21266	Glutathione S-transferase Mu 3 OS=Homo sapiens GN=GSTM3 PE=1 SV=3 - [GSTM3_HUMAN]	49.33	2	12	13	24	6.22232e+06	1.68167e+07	14.3419	37.78	9	10	30.042	43.11	11	14	225	26.5421	5.5415
Q9H0U4	Ras-related protein Rab-1B OS=Homo sapiens GN=RAB1B PE=1 SV=1 - [RAB1B_HUMAN]	53.73	31	4	8	23	1.87959e+07	5.16382e+07	23.1286	40.8	6	9	34.7423	49.75	7	14	201	22.1572	5.73193
P80365	Corticosteroid 11-beta-dehydrogenase isozyme 2 OS=Homo sapiens GN=HSD11B2 PE=1 SV=2 - [DHI2_HUMAN]	46.17	1	11	11	23	7.59685e+06	1.83464e+07	16.7747	18.02	6	9	35.228	46.17	11	14	405	44.0984	9.27588
P04217	Alpha-1B-glycoprotein OS=Homo sapiens GN=A1BG PE=1 SV=4 - [A1BG_HUMAN]	35.56	2	11	11	23	4.20142e+06	1.27337e+07	22.2523	24.24	8	9	34.6443	33.13	10	14	495	54.2195	5.85889
Q9Y5X3	Sorting nexin-5 OS=Homo sapiens GN=SNX5 PE=1 SV=1 - [SNX5_HUMAN]	31.44	4	11	12	23	4.88852e+06	8.5236e+06	17.8405	20.54	6	9	30.8432	31.44	12	14	404	46.7872	6.75635
Q9H223	EH domain-containing protein 4 OS=Homo sapiens GN=EHD4 PE=1 SV=1 - [EHD4_HUMAN]	23.48	1	9	10	23	3.79417e+06	1.21605e+07	17.7998	16.27	7	9	34.0688	19.78	8	14	541	61.1365	6.75635
P15121	Aldose reductase OS=Homo sapiens GN=AKR1B1 PE=1 SV=3 - [ALDR_HUMAN]	50	3	11	11	22	5.14912e+06	1.85676e+07	11.7343	20.25	5	8	26.9744	50	11	14	316	35.8305	6.97607
P00734	Prothrombin OS=Homo sapiens GN=F2 PE=1 SV=2 - [THRB_HUMAN]	36.17	3	13	13	22	3.80223e+06	1.33041e+07	16.013	19.13	8	8	42.4816	34.73	12	14	622	69.9921	5.89697
Q07021	Complement component 1 Q subcomponent-binding protein, mitochondrial OS=Homo sapiens GN=C1QBP PE=1 SV=1 - [C1QBP_HUMAN]	33.69	3	7	7	22	4.49905e+06	2.99351e+07	11.8438	24.47	4	8	44.9154	33.69	7	14	282	31.3426	4.84326
P19652	Alpha-1-acid glycoprotein 2 OS=Homo sapiens GN=ORM2 PE=1 SV=2 - [A1AG2_HUMAN]	46.27	1	5	9	21	7.35275e+06	1.95965e+07	13.3748	18.41	5	7	31.5631	46.27	9	14	201	23.5876	5.10986
A0A087WTP3	Far upstream element-binding protein 2 OS=Homo sapiens GN=KHSRP PE=1 SV=1 - [A0A087WTP3_HUMAN]	26.72	8	13	13	21	3.38045e+06	1.02873e+07	13.5859	16.6	7	7	29.9048	26.72	13	14	711	72.9823	7.7085
P12694	2-oxoisovalerate dehydrogenase subunit alpha, mitochondrial OS=Homo sapiens GN=BCKDHA PE=1 SV=2 - [ODBA_HUMAN]	34.38	4	10	10	20	2.84192e+06	1.84257e+07	11.3365	14.61	5	6	32.4054	32.58	9	14	445	50.4392	8.26514
Q9UHL4	Dipeptidyl peptidase 2 OS=Homo sapiens GN=DPP7 PE=1 SV=3 - [DPP2_HUMAN]	25.81	5	9	9	20	3.2185e+06	1.65283e+07	14.468	13.62	5	6	37.7385	25.81	9	14	492	54.3072	6.31592
Q14651	Plastin-1 OS=Homo sapiens GN=PLS1 PE=1 SV=2 - [PLSI_HUMAN]	24.48	2	7	10	20	3.77775e+06	1.77875e+07	14.7425	8.43	4	6	36.3866	24.48	10	14	629	70.2093	5.41455
A0A024R3B9	Alpha-crystallin B chain OS=Homo sapiens GN=CRYAB PE=1 SV=1 - [A0A024R3B9_HUMAN]	83.33	7	11	11	19	9.66976e+06	2.47376e+07	9.83214	30.56	4	5	34.7961	83.33	11	14	108	12.2455	8.45557
O95861	3'(2'),5'-bisphosphate nucleotidase 1 OS=Homo sapiens GN=BPNT1 PE=1 SV=1 - [BPNT1_HUMAN]	42.86	6	10	10	19	2.76946e+06	1.14337e+07	8.88582	11.36	3	5	33.1485	42.86	10	14	308	33.3712	5.69385
P31939	Bifunctional purine biosynthesis protein PURH OS=Homo sapiens GN=ATIC PE=1 SV=3 - [PUR9_HUMAN]	37.5	4	15	15	19	3.6775e+06	7.16848e+06	10.8387	11.82	5	5	26.7589	31.25	12	14	592	64.5753	6.7124
P08754	Guanine nucleotide-binding protein G(k) subunit alpha OS=Homo sapiens GN=GNAI3 PE=1 SV=3 - [GNAI3_HUMAN]	32.77	11	3	9	19	1.16192e+07	3.28639e+07	11.2588	12.15	3	5	30.7352	32.77	9	14	354	40.5063	5.69385
P61163	Alpha-centractin OS=Homo sapiens GN=ACTR1A PE=1 SV=1 - [ACTZ_HUMAN]	43.35	3	5	10	18	4.87028e+06	1.69286e+07	10.7181	15.43	4	4	29.4532	43.35	10	14	376	42.5869	6.63916
P09104	Gamma-enolase OS=Homo sapiens GN=ENO2 PE=1 SV=3 - [ENOG_HUMAN]	15.44	8	1	5	18	1.67793e+07	9.90965e+07	13.0373	7.6	2	4	49.6482	15.44	5	14	434	47.239	5.03369
P21964	Catechol O-methyltransferase OS=Homo sapiens GN=COMT PE=1 SV=2 - [COMT_HUMAN]	56.83	5	11	11	17	1.61798e+06	1.98194e+07	5.8318	18.45	3	3	36.0741	56.83	11	14	271	30.0176	5.46533
P50895	Basal cell adhesion molecule OS=Homo sapiens GN=BCAM PE=1 SV=2 - [BCAM_HUMAN]	28.34	3	14	14	17	434783	9.22333e+06	4.57123	6.21	3	3	25.3637	25.96	13	14	628	67.3626	5.80811
O94973	AP-2 complex subunit alpha-2 OS=Homo sapiens GN=AP2A2 PE=1 SV=2 - [AP2A2_HUMAN]	25.56	14	10	15	17	1.10263e+06	6.66189e+06	7.99703	4.79	3	3	32.5819	21.83	13	14	939	103.895	6.96143
P23246	Splicing factor, proline- and glutamine-rich OS=Homo sapiens GN=SFPQ PE=1 SV=2 - [SFPQ_HUMAN]	19.38	4	11	12	17	2.92826e+06	7.90609e+06	8.27825	5.8	3	3	28.9297	18.1	11	14	707	76.1016	9.43701
Q13561	Dynactin subunit 2 OS=Homo sapiens GN=DCTN2 PE=1 SV=4 - [DCTN2_HUMAN]	36.16	8	12	12	16	2.26376e+06	7.22719e+06	2.1903	4.49	2	2	23.0147	31.67	10	14	401	44.2039	5.21143
	>sp|TRYP_PIG|	31.6	1	5	5	29	5.29564e+08	6.06361e+08	40.267	31.6	5	16	34.2721	31.6	5	13	231	24.3938	7.18115
P53621	Coatomer subunit alpha OS=Homo sapiens GN=COPA PE=1 SV=2 - [COPA_HUMAN]	23.04	1	19	19	28	2.23945e+06	4.05472e+06	29.6793	18.38	15	15	27.4669	14.62	12	13	1224	138.258	7.66455
Q9P2R7	Succinate--CoA ligase [ADP-forming] subunit beta, mitochondrial OS=Homo sapiens GN=SUCLA2 PE=1 SV=3 - [SUCB1_HUMAN]	23.11	6	10	10	27	1.83464e+07	2.46781e+07	29.6457	19.22	8	14	24.7095	23.11	10	13	463	50.2852	7.41553
Q9BSH5	Haloacid dehalogenase-like hydrolase domain-containing protein 3 OS=Homo sapiens GN=HDHD3 PE=1 SV=1 - [HDHD3_HUMAN]	66.93	1	11	11	26	7.82401e+06	1.3203e+07	31.6777	49.4	9	13	34.4285	59.76	10	13	251	27.9824	6.7124
Q14847	LIM and SH3 domain protein 1 OS=Homo sapiens GN=LASP1 PE=1 SV=2 - [LASP1_HUMAN]	57.47	5	13	13	26	8.41182e+06	1.48713e+07	27.748	34.48	10	13	34.0517	51.34	10	13	261	29.6982	7.04932
P51687	Sulfite oxidase, mitochondrial OS=Homo sapiens GN=SUOX PE=1 SV=2 - [SUOX_HUMAN]	45.5	2	13	13	26	1.08649e+07	1.58774e+07	26.213	24.59	9	13	28.4009	39.08	10	13	545	60.2454	6.11279
P47985	Cytochrome b-c1 complex subunit Rieske, mitochondrial OS=Homo sapiens GN=UQCRFS1 PE=1 SV=2 - [UCRI_HUMAN]	32.12	2	7	7	26	1.3011e+07	3.97776e+07	30.8557	32.12	7	13	47.1983	32.12	7	13	274	29.6494	8.32373
P11182	Lipoamide acyltransferase component of branched-chain alpha-keto acid dehydrogenase complex, mitochondrial OS=Homo sapiens GN=DBT PE=1 SV=3 - [ODB2_HUMAN]	30.91	2	12	12	26	5.02638e+06	9.40547e+06	20.6756	22.41	9	13	30.1418	23.24	9	13	482	53.4529	8.51416
O60506	Heterogeneous nuclear ribonucleoprotein Q OS=Homo sapiens GN=SYNCRIP PE=1 SV=2 - [HNRPQ_HUMAN]	26.65	3	8	13	26	5.36595e+06	1.2417e+07	22.3929	15.73	10	13	31.273	23.11	11	13	623	69.5596	8.5874
P30085	UMP-CMP kinase OS=Homo sapiens GN=CMPK1 PE=1 SV=3 - [KCY_HUMAN]	48.47	2	7	7	24	2.87411e+06	6.71055e+06	17.3775	35.2	5	11	26.7898	48.47	7	13	196	22.2083	5.56689
P35221	Catenin alpha-1 OS=Homo sapiens GN=CTNNA1 PE=1 SV=1 - [CTNA1_HUMAN]	26.6	16	16	16	24	3.40642e+06	6.3258e+06	16.3439	15.89	10	11	27.1325	20.09	12	13	906	100.009	6.29053
P54920	Alpha-soluble NSF attachment protein OS=Homo sapiens GN=NAPA PE=1 SV=3 - [SNAA_HUMAN]	55.93	12	11	11	22	4.11904e+06	1.0342e+07	21.9352	41.36	8	9	28.1751	51.53	10	13	295	33.2113	5.36377
Q15907	Ras-related protein Rab-11B OS=Homo sapiens GN=RAB11B PE=1 SV=4 - [RB11B_HUMAN]	49.08	6	10	10	22	1.67436e+07	3.17913e+07	21.5821	29.82	7	9	29.1578	49.08	9	13	218	24.4735	5.93506
Q92506	Estradiol 17-beta-dehydrogenase 8 OS=Homo sapiens GN=HSD17B8 PE=1 SV=2 - [DHB8_HUMAN]	47.89	1	9	9	22	1.03262e+07	1.69744e+07	22.5268	32.95	6	9	35.0235	47.89	9	13	261	26.9568	6.53662
A0A087WUQ6	Glutathione peroxidase OS=Homo sapiens GN=GPX1 PE=1 SV=1 - [A0A087WUQ6_HUMAN]	66.34	2	10	10	21	6.97937e+06	2.76501e+07	14.6985	48.02	7	8	36.0934	50.99	8	13	202	21.9242	6.55127
P46926	Glucosamine-6-phosphate isomerase 1 OS=Homo sapiens GN=GNPDA1 PE=1 SV=1 - [GNPI1_HUMAN]	57.44	8	11	11	21	5.45082e+06	1.0943e+07	16.0098	31.83	6	8	24.1594	42.91	8	13	289	32.6476	6.91748
Q16718	NADH dehydrogenase [ubiquinone] 1 alpha subcomplex subunit 5 OS=Homo sapiens GN=NDUFA5 PE=1 SV=3 - [NDUA5_HUMAN]	68.97	6	8	8	20	9.83145e+06	2.69095e+07	14.219	43.97	5	7	42.8017	68.97	8	13	116	13.4502	5.98584
P30043	Flavin reductase (NADPH) OS=Homo sapiens GN=BLVRB PE=1 SV=3 - [BLVRB_HUMAN]	65.05	3	9	9	20	3.50468e+07	3.6373e+07	17.4505	40.29	5	7	36.0112	65.05	9	13	206	22.1054	7.6499
Q9Y6M9	NADH dehydrogenase [ubiquinone] 1 beta subcomplex subunit 9 OS=Homo sapiens GN=NDUFB9 PE=1 SV=3 - [NDUB9_HUMAN]	60.89	4	8	8	20	4.9681e+06	1.72344e+07	12.3052	34.64	5	7	28.3013	60.89	8	13	179	21.8168	8.38232
O96000	NADH dehydrogenase [ubiquinone] 1 beta subcomplex subunit 10 OS=Homo sapiens GN=NDUFB10 PE=1 SV=3 - [NDUBA_HUMAN]	46.51	3	8	8	19	7.57685e+06	1.98353e+07	16.7154	30.23	5	6	31.2791	46.51	8	13	172	20.7632	8.48486
Q5VY30	Retinol binding protein 4, plasma, isoform CRA_b OS=Homo sapiens GN=RBP4 PE=1 SV=2 - [Q5VY30_HUMAN]	46.23	2	8	8	19	8.82943e+06	1.53694e+07	12.3285	20.6	4	6	24.7017	46.23	7	13	199	22.9591	6.0874
P06748	Nucleophosmin OS=Homo sapiens GN=NPM1 PE=1 SV=2 - [NPM_HUMAN]	33.33	3	9	9	19	2.69921e+06	9.83809e+06	6.77365	23.81	3	6	33.6709	33.33	9	13	294	32.5548	4.77979
Q9NZN3	EH domain-containing protein 3 OS=Homo sapiens GN=EHD3 PE=1 SV=2 - [EHD3_HUMAN]	30.84	2	4	10	19	1.44035e+06	5.6251e+06	10.9478	11.78	5	6	37.5273	28.79	9	13	535	60.8487	6.56592
A0A087X0D5	Pro-cathepsin H OS=Homo sapiens GN=CTSH PE=1 SV=1 - [A0A087X0D5_HUMAN]	28.17	3	10	10	19	4.56037e+06	1.54739e+07	7.70199	9.91	3	6	36.55	28.17	9	13	323	36.2455	8.104
A0A087WUK2	Heterogeneous nuclear ribonucleoprotein D-like OS=Homo sapiens GN=HNRNPDL PE=1 SV=1 - [A0A087WUK2_HUMAN]	17.08	2	6	8	19	5.48266e+06	1.9077e+07	14.6479	6.89	3	6	29.5424	17.08	8	13	363	40.0156	9.96436
Q15417	Calponin-3 OS=Homo sapiens GN=CNN3 PE=1 SV=1 - [CNN3_HUMAN]	51.37	2	10	10	18	2.73803e+06	5.95168e+06	12.3342	14.89	4	5	23.3176	47.42	9	13	329	36.3908	6.04932
Q02338	D-beta-hydroxybutyrate dehydrogenase, mitochondrial OS=Homo sapiens GN=BDH1 PE=1 SV=3 - [BDH_HUMAN]	45.77	8	10	10	18	1.13524e+06	1.17389e+07	7.25746	20.12	4	5	28.747	45.77	10	13	343	38.1325	8.95361
P23381	Tryptophan--tRNA ligase, cytoplasmic OS=Homo sapiens GN=WARS PE=1 SV=2 - [SYWC_HUMAN]	40.98	21	12	12	18	2.05877e+06	1.24211e+07	9.92535	14.86	5	5	31.2349	38.85	11	13	471	53.1316	6.22705
P62701	40S ribosomal protein S4, X isoform OS=Homo sapiens GN=RPS4X PE=1 SV=2 - [RS4X_HUMAN]	40.68	4	10	10	18	2.68633e+06	9.77607e+06	11.3985	13.69	4	5	31.0132	40.68	10	13	263	29.5791	10.1548
B1AMS2	Septin 6, isoform CRA_b OS=Homo sapiens GN=SEPT6 PE=1 SV=1 - [B1AMS2_HUMAN]	26.45	3	4	8	18	3.73726e+06	1.21745e+07	7.91415	4.64	2	5	27.8479	26.45	8	13	431	49.2722	6.81494
P00568	Adenylate kinase isoenzyme 1 OS=Homo sapiens GN=AK1 PE=1 SV=3 - [KAD1_HUMAN]	54.64	5	11	11	17	1.97345e+06	6.08726e+06	6.07414	15.98	3	4	31.2147	54.64	10	13	194	21.6213	8.63135
F8W914	Reticulon OS=Homo sapiens GN=RTN4 PE=1 SV=1 - [F8W914_HUMAN]	33.62	4	8	8	17	3.36183e+06	2.78553e+07	12.0769	6.38	2	4	34.2888	33.62	8	13	345	37.1214	4.76709
P02748	Complement component C9 OS=Homo sapiens GN=C9 PE=1 SV=2 - [CO9_HUMAN]	20.57	1	11	11	17	2.92636e+06	1.69051e+07	8.86119	7.87	4	4	31.2979	20.57	11	13	559	63.1327	5.59229
O00151	PDZ and LIM domain protein 1 OS=Homo sapiens GN=PDLIM1 PE=1 SV=4 - [PDLI1_HUMAN]	48.94	1	10	10	16	383180	1.22391e+07	5.88895	11.55	3	3	29.9949	42.25	8	13	329	36.049	7.02002
Q96HY7	Probable 2-oxoglutarate dehydrogenase E1 component DHKTD1, mitochondrial OS=Homo sapiens GN=DHTKD1 PE=1 SV=2 - [DHTK1_HUMAN]	19.59	4	11	11	16	1.0086e+06	7.48364e+06	4.51208	3.59	3	3	33.5895	19.59	11	13	919	103.011	6.93213
P07384	Calpain-1 catalytic subunit OS=Homo sapiens GN=CAPN1 PE=1 SV=1 - [CAN1_HUMAN]	20.31	10	10	10	15	260386	1.19305e+07	1.84705	2.52	2	2	33.5032	19.19	9	13	714	81.8382	5.66846
Q15075	Early endosome antigen 1 OS=Homo sapiens GN=EEA1 PE=1 SV=2 - [EEA1_HUMAN]	12.47	1	13	13	15	446044	3.36653e+06	1.84876	1.49	2	2	34.628	12.47	13	13	1411	162.367	5.68115
P78527	DNA-dependent protein kinase catalytic subunit OS=Homo sapiens GN=PRKDC PE=1 SV=3 - [PRKDC_HUMAN]	4.12	1	12	12	15	852556	3.85426e+06	3.93653	0.7	2	2	23.7575	4.12	12	13	4128	468.788	7.12256
Q08380	Galectin-3-binding protein OS=Homo sapiens GN=LGALS3BP PE=1 SV=1 - [LG3BP_HUMAN]	27.01	10	11	11	14	1.06736e+06	1.81242e+07	2.79616	2.91	1	1	24.0562	27.01	11	13	585	65.2893	5.2749
Q15582	Transforming growth factor-beta-induced protein ig-h3 OS=Homo sapiens GN=TGFBI PE=1 SV=1 - [BGH3_HUMAN]	26.21	6	13	13	14	87161.5	6.26345e+06	0	2.05	1	1	27.5426	26.21	12	13	683	74.634	7.7085
A0A087WYJ9	Immunoglobulin heavy constant mu OS=Homo sapiens GN=IGHM PE=1 SV=2 - [A0A087WYJ9_HUMAN]	30.97	4	10	10	13	0	1.56983e+07		0			28.7976	30.97	10	13	452	49.3516	6.771
A0A087X208	Agrin OS=Homo sapiens GN=AGRN PE=1 SV=1 - [A0A087X208_HUMAN]	7.51	3	11	11	13	0	4.95638e+06		0			20.1142	7.51	11	13	1930	202.162	6.3667
P35558	Phosphoenolpyruvate carboxykinase, cytosolic [GTP] OS=Homo sapiens GN=PCK1 PE=1 SV=3 - [PCKGC_HUMAN]	64.47	1	28	31	70	4.75596e+07	1.17943e+07	134.21	64.47	31	58	23.4803	26.37	10	12	622	69.1497	6.13818
P27144	Adenylate kinase 4, mitochondrial OS=Homo sapiens GN=AK4 PE=1 SV=1 - [KAD4_HUMAN]	68.61	2	12	12	43	2.37029e+07	6.61545e+06	62.6572	68.61	12	31	27.0706	55.16	9	12	223	25.2522	8.39697
Q9Y617	Phosphoserine aminotransferase OS=Homo sapiens GN=PSAT1 PE=1 SV=2 - [SERC_HUMAN]	51.62	1	16	16	39	3.30668e+07	1.93428e+07	64.6555	51.62	16	27	31.8661	32.7	9	12	370	40.3968	7.66455
A0A0A0MSS8	Aldo-keto reductase family 1 member C3 OS=Homo sapiens GN=AKR1C3 PE=1 SV=1 - [A0A0A0MSS8_HUMAN]	52.94	5	9	14	36	3.22288e+07	1.69495e+07	69.5865	50.46	13	24	37.0428	37.15	8	12	323	36.8439	7.94287
Q9NSE4	Isoleucine--tRNA ligase, mitochondrial OS=Homo sapiens GN=IARS2 PE=1 SV=2 - [SYIM_HUMAN]	23.32	1	19	19	29	6.41297e+06	7.42096e+06	40.6278	16.01	14	17	26.5757	16.5	11	12	1012	113.719	7.1958
P25325	3-mercaptopyruvate sulfurtransferase OS=Homo sapiens GN=MPST PE=1 SV=3 - [THTM_HUMAN]	68.35	2	14	14	27	9.47031e+06	1.91291e+07	36.6724	54.21	12	15	29.079	44.78	8	12	297	33.1576	6.59521
Q9P0Z9	Peroxisomal sarcosine oxidase OS=Homo sapiens GN=PIPOX PE=1 SV=2 - [SOX_HUMAN]	35.13	3	11	11	26	6.94325e+06	1.25937e+07	22.5834	29.23	9	14	28.4013	29.74	9	12	390	44.0377	8.41162
P20674	Cytochrome c oxidase subunit 5A, mitochondrial OS=Homo sapiens GN=COX5A PE=1 SV=2 - [COX5A_HUMAN]	50.67	5	6	6	25	2.13099e+07	3.91356e+07	32.98	27.33	5	13	40.6945	50.67	5	12	150	16.7517	6.78564
	>sp|CYB5_HUMAN|	49.62	3	6	6	25	7.25195e+07	1.39628e+08	30.3759	49.62	5	13	34.4389	42.86	5	12	133	15.1895	4.95752
P23396	40S ribosomal protein S3 OS=Homo sapiens GN=RPS3 PE=1 SV=2 - [RS3_HUMAN]	59.26	14	13	13	24	8.3998e+06	1.50608e+07	20.3704	42.39	10	12	28.7414	46.09	10	12	243	26.6714	9.65674
P26440	Isovaleryl-CoA dehydrogenase, mitochondrial OS=Homo sapiens GN=IVD PE=1 SV=1 - [IVD_HUMAN]	39.95	7	13	13	24	1.13479e+07	1.88124e+07	23.0506	34.28	11	12	30.2626	34.75	11	12	423	46.2896	8.19189
O95202	LETM1 and EF-hand domain-containing protein 1, mitochondrial OS=Homo sapiens GN=LETM1 PE=1 SV=1 - [LETM1_HUMAN]	26.93	1	16	16	24	2.89835e+06	5.55056e+06	20.5205	20.43	11	12	25.822	19.22	11	12	739	83.302	6.69775
F8W1U3	Keratin, type II cytoskeletal 8 (Fragment) OS=Homo sapiens GN=KRT8 PE=1 SV=1 - [F8W1U3_HUMAN]	50.87	25	1	12	23	2.43617e+07	5.02796e+07	23.6022	33.22	9	11	30.7754	39.45	9	12	289	32.5285	6.88818
Q9Y6R1	Electrogenic sodium bicarbonate cotransporter 1 OS=Homo sapiens GN=SLC4A4 PE=1 SV=1 - [S4A4_HUMAN]	14.92	5	12	12	23	4.46023e+06	8.20556e+06	22.1177	7.04	6	11	28.0932	12.42	9	12	1079	121.383	6.80029
P69892	Hemoglobin subunit gamma-2 OS=Homo sapiens GN=HBG2 PE=1 SV=2 - [HBG2_HUMAN]	43.54	4	1	5	22	7.50214e+08	8.12654e+08	14.8577	14.97	2	10	30.7148	35.37	4	12	147	16.1163	7.1958
Q9NPJ3	Acyl-coenzyme A thioesterase 13 OS=Homo sapiens GN=ACOT13 PE=1 SV=1 - [ACO13_HUMAN]	65	1	6	6	21	2.27293e+07	2.84414e+07	22.2311	40.71	5	9	27.9142	65	6	12	140	14.9509	9.14404
Q6P587	Acylpyruvase FAHD1, mitochondrial OS=Homo sapiens GN=FAHD1 PE=1 SV=2 - [FAHD1_HUMAN]	57.14	1	8	8	21	1.43652e+07	4.13119e+07	26.2582	33.93	5	9	33.5552	57.14	7	12	224	24.8267	7.38623
Q9NTX5	Ethylmalonyl-CoA decarboxylase OS=Homo sapiens GN=ECHDC1 PE=1 SV=2 - [ECHD1_HUMAN]	47.88	11	11	11	21	7.79497e+06	1.67718e+07	19.4341	25.41	7	9	32.2452	43	9	12	307	33.6765	8.20654
A0A087X2B5	Basigin (Fragment) OS=Homo sapiens GN=BSG PE=1 SV=1 - [A0A087X2B5_HUMAN]	41.63	6	5	5	21	5.61657e+06	1.2924e+07	23.4556	19.46	3	9	36.3909	41.63	5	12	221	23.881	5.24951
P08237	ATP-dependent 6-phosphofructokinase, muscle type OS=Homo sapiens GN=PFKM PE=1 SV=2 - [PFKAM_HUMAN]	21.15	16	9	12	21	2.90989e+06	4.49546e+06	16.4877	11.28	7	9	20.6013	18.85	10	12	780	85.1284	7.98682
P98082	Disabled homolog 2 OS=Homo sapiens GN=DAB2 PE=1 SV=3 - [DAB2_HUMAN]	20.65	4	12	12	21	5.60462e+06	1.12979e+07	20.0836	14.68	8	9	29.8835	16.1	9	12	770	82.397	5.52881
E9PN17	ATP synthase subunit g, mitochondrial OS=Homo sapiens GN=ATP5L PE=1 SV=1 - [E9PN17_HUMAN]	71.05	2	6	6	20	1.56721e+07	2.18304e+07	18.0379	69.74	5	8	33.5553	71.05	6	12	76	8.44668	10.2866
P07741	Adenine phosphoribosyltransferase OS=Homo sapiens GN=APRT PE=1 SV=2 - [APT_HUMAN]	65	5	7	7	20	6.65303e+06	1.42828e+07	18.819	42.78	5	8	24.1337	56.67	6	12	180	19.5954	6.02393
Q04760	Lactoylglutathione lyase OS=Homo sapiens GN=GLO1 PE=1 SV=4 - [LGUL_HUMAN]	64.67	1	11	11	20	5.74849e+06	7.03838e+06	10.5117	41.3	7	8	27.9721	57.07	8	12	184	20.7642	5.31299
Q9BX68	Histidine triad nucleotide-binding protein 2, mitochondrial OS=Homo sapiens GN=HINT2 PE=1 SV=1 - [HINT2_HUMAN]	57.67	1	6	6	20	1.04457e+07	2.07064e+07	13.4066	57.67	6	8	29.8156	57.67	6	12	163	17.1512	9.15869
P52907	F-actin-capping protein subunit alpha-1 OS=Homo sapiens GN=CAPZA1 PE=1 SV=3 - [CAZA1_HUMAN]	51.05	1	8	11	20	4.46089e+06	2.55945e+07	16.2748	30.42	6	8	27.6387	51.05	11	12	286	32.9023	5.69385
P18859	ATP synthase-coupling factor 6, mitochondrial OS=Homo sapiens GN=ATP5J PE=1 SV=1 - [ATP5J_HUMAN]	50.93	2	7	7	20	1.52822e+07	1.79658e+07	19.5652	50.93	7	8	31.7975	47.22	6	12	108	12.5796	9.5249
P35270	Sepiapterin reductase OS=Homo sapiens GN=SPR PE=1 SV=1 - [SPRE_HUMAN]	47.51	1	9	9	20	3.32155e+06	9.5264e+06	16.6792	35.63	7	8	29.9633	37.93	7	12	261	28.0308	8.04541
E9PPW7	NADH dehydrogenase [ubiquinone] iron-sulfur protein 8, mitochondrial (Fragment) OS=Homo sapiens GN=NDUFS8 PE=1 SV=1 - [E9PPW7_HUMAN]	30.98	5	5	5	20	2.87747e+06	1.23865e+07	15.2735	30.98	5	8	29.0965	27.17	4	12	184	20.6431	6.7417
P10619	Lysosomal protective protein OS=Homo sapiens GN=CTSA PE=1 SV=2 - [PPGB_HUMAN]	25	7	10	10	20	6.21163e+06	1.39957e+07	20.0682	20	7	8	30.7872	22.71	9	12	480	54.4311	6.60986
Q06323	Proteasome activator complex subunit 1 OS=Homo sapiens GN=PSME1 PE=1 SV=1 - [PSME1_HUMAN]	49.4	3	10	10	19	7.91376e+06	2.05113e+07	10.8624	31.33	6	7	26.873	35.74	8	12	249	28.705	6.02393
Q15181	Inorganic pyrophosphatase OS=Homo sapiens GN=PPA1 PE=1 SV=2 - [IPYR_HUMAN]	48.1	2	9	10	19	1.09744e+07	2.76159e+07	15.2654	27.34	5	7	33.3811	48.1	10	12	289	32.6392	5.85889
H3BPK3	Hydroxyacylglutathione hydrolase, mitochondrial (Fragment) OS=Homo sapiens GN=HAGH PE=1 SV=1 - [H3BPK3_HUMAN]	44.77	5	7	7	19	7.71342e+06	1.2682e+07	15.1881	34.31	6	7	21.9145	36.82	6	12	239	26.3984	8.23584
Q53GQ0	Very-long-chain 3-oxoacyl-CoA reductase OS=Homo sapiens GN=HSD17B12 PE=1 SV=2 - [DHB12_HUMAN]	38.46	4	9	9	19	4.10148e+06	1.75456e+07	11.6859	23.72	5	7	30.073	38.46	9	12	312	34.3022	9.31982
Q14247	Src substrate cortactin OS=Homo sapiens GN=CTTN PE=1 SV=2 - [SRC8_HUMAN]	37.45	3	14	14	19	2.71185e+06	9.36704e+06	11.0862	15.09	7	7	25.6363	33.27	12	12	550	61.5485	5.40186
P05388	60S acidic ribosomal protein P0 OS=Homo sapiens GN=RPLP0 PE=1 SV=1 - [RLA0_HUMAN]	47.63	13	10	10	18	6.46351e+06	1.49705e+07	13.102	26.81	6	6	28.0287	47.63	9	12	317	34.2518	5.97314
P62140	Serine/threonine-protein phosphatase PP1-beta catalytic subunit OS=Homo sapiens GN=PPP1CB PE=1 SV=3 - [PP1B_HUMAN]	31.8	9	2	9	18	1.516e+06	7.38901e+06	12.6358	19.57	5	6	26.5328	31.8	9	12	327	37.1626	6.18896
P35998	26S protease regulatory subunit 7 OS=Homo sapiens GN=PSMC2 PE=1 SV=3 - [PRS7_HUMAN]	30.95	2	11	11	18	2.58877e+06	5.74862e+06	8.26806	12.47	5	6	23.9517	28.87	10	12	433	48.6031	5.94775
Q02818	Nucleobindin-1 OS=Homo sapiens GN=NUCB1 PE=1 SV=4 - [NUCB1_HUMAN]	27.55	5	11	11	17	1.38833e+06	5.59075e+06	4.23311	11.71	5	5	23.2026	27.55	11	12	461	53.8463	5.24951
A0A087X142	Septin-8 OS=Homo sapiens GN=SEPT8 PE=1 SV=1 - [A0A087X142_HUMAN]	25.59	9	4	8	17	4.11248e+06	1.48478e+07	8.4101	5.87	2	5	26.2052	25.59	8	12	426	49.3251	6.20166
Q96G03	Phosphoglucomutase-2 OS=Homo sapiens GN=PGM2 PE=1 SV=4 - [PGM2_HUMAN]	22.06	3	11	11	17	670765	8.67332e+06	9.58462	8.01	4	5	22.3579	22.06	10	12	612	68.2404	6.72705
Q9NYU2	UDP-glucose:glycoprotein glucosyltransferase 1 OS=Homo sapiens GN=UGGT1 PE=1 SV=3 - [UGGG1_HUMAN]	12.86	2	14	14	17	1.43895e+06	3.97454e+06	5.84555	3.67	5	5	21.3784	11.45	12	12	1555	177.078	5.63037
B9A064	Immunoglobulin lambda-like polypeptide 5 OS=Homo sapiens GN=IGLL5 PE=2 SV=2 - [IGLL5_HUMAN]	38.32	3	2	6	16	2.39837e+07	9.99324e+07	8.37338	10.75	2	4	31.2723	38.32	6	12	214	23.0486	8.83643
O15143	Actin-related protein 2/3 complex subunit 1B OS=Homo sapiens GN=ARPC1B PE=1 SV=3 - [ARC1B_HUMAN]	36.56	7	9	10	16	2.79736e+06	1.2199e+07	6.24112	16.4	4	4	27.9303	36.56	10	12	372	40.9234	8.35303
P27105	Erythrocyte band 7 integral membrane protein OS=Homo sapiens GN=STOM PE=1 SV=3 - [STOM_HUMAN]	28.13	2	6	6	16	1.32426e+06	1.13942e+07	6.04477	18.4	4	4	20.2775	28.13	6	12	288	31.7107	7.88428
Q96BW5	Phosphotriesterase-related protein OS=Homo sapiens GN=PTER PE=1 SV=1 - [PTER_HUMAN]	40.4	2	11	11	15	2.41834e+06	1.99248e+07	4.54177	7.74	2	3	29.9595	40.4	11	12	349	38.993	6.52197
P25787	Proteasome subunit alpha type-2 OS=Homo sapiens GN=PSMA2 PE=1 SV=2 - [PSA2_HUMAN]	42.74	4	6	6	14	4.02922e+06	1.61238e+07	1.7317	5.98	1	2	27.4727	42.74	6	12	234	25.8823	7.43018
Q9NTK5	Obg-like ATPase 1 OS=Homo sapiens GN=OLA1 PE=1 SV=2 - [OLA1_HUMAN]	32.83	4	9	9	14	2.59114e+06	8.52013e+06	2.07027	4.8	2	2	25.9553	32.83	9	12	396	44.7153	7.81104
E9PNW4	CD59 glycoprotein OS=Homo sapiens GN=CD59 PE=1 SV=1 - [E9PNW4_HUMAN]	30.56	4	5	5	14	8.17818e+06	4.039e+07	4.63669	18.52	2	2	36.4378	30.56	5	12	108	11.9765	5.74463
Q6UWM9	UDP-glucuronosyltransferase 2A3 OS=Homo sapiens GN=UGT2A3 PE=2 SV=2 - [UD2A3_HUMAN]	21.63	6	10	10	14	2.08841e+06	9.70294e+06	4.68081	4.55	2	2	24.8662	21.63	10	12	527	60.215	7.95752
Q9UGT4	Sushi domain-containing protein 2 OS=Homo sapiens GN=SUSD2 PE=1 SV=1 - [SUSD2_HUMAN]	26.4	1	9	9	13	1.26795e+06	1.44506e+07	1.6781	1.46	1	1	21.4703	26.4	9	12	822	90.1497	6.27783
P24298	Alanine aminotransferase 1 OS=Homo sapiens GN=GPT PE=1 SV=3 - [ALAT1_HUMAN]	34.27	1	10	10	12	0	1.44243e+07		0			31.3678	34.27	10	12	496	54.6022	7.18115
P19801	Amiloride-sensitive amine oxidase [copper-containing] OS=Homo sapiens GN=AOC1 PE=1 SV=4 - [AOC1_HUMAN]	17.04	3	10	10	12	0	6.17976e+06		0			25.5458	17.04	10	12	751	85.3237	7.09326
P63244	Receptor of activated protein C kinase 1 OS=Homo sapiens GN=RACK1 PE=1 SV=3 - [RACK1_HUMAN]	56.78	21	12	14	24	8.09299e+06	1.76402e+07	23.9576	49.21	11	13	23.4796	42.9	10	11	317	35.0546	7.69385
O60701	UDP-glucose 6-dehydrogenase OS=Homo sapiens GN=UGDH PE=1 SV=1 - [UGDH_HUMAN]	33	5	12	12	24	9.99256e+06	1.26298e+07	30.8438	27.73	10	13	26.9827	27.94	10	11	494	54.9893	7.12256
P17858	ATP-dependent 6-phosphofructokinase, liver type OS=Homo sapiens GN=PFKL PE=1 SV=6 - [PFKAL_HUMAN]	26.28	3	11	15	24	5.73049e+06	7.08204e+06	28.2852	20.26	11	13	25.1807	18.21	10	11	780	84.9642	7.50342
P78417	Glutathione S-transferase omega-1 OS=Homo sapiens GN=GSTO1 PE=1 SV=2 - [GSTO1_HUMAN]	48.55	3	10	10	23	1.3013e+07	1.1946e+07	22.6505	27.39	7	12	21.5915	47.3	9	11	241	27.548	6.59521
Q9Y3I0	tRNA-splicing ligase RtcB homolog OS=Homo sapiens GN=RTCB PE=1 SV=1 - [RTCB_HUMAN]	45.15	1	15	15	23	3.46998e+06	6.04062e+06	16.1255	22.77	10	12	18.4954	38.22	11	11	505	55.1749	7.2251
Q5R3I4	Tetratricopeptide repeat protein 38 OS=Homo sapiens GN=TTC38 PE=1 SV=1 - [TTC38_HUMAN]	34.12	4	11	11	23	9.23149e+06	1.06549e+07	27.1788	28.78	9	12	28.5113	31.77	10	11	469	52.7535	5.98584
P10606	Cytochrome c oxidase subunit 5B, mitochondrial OS=Homo sapiens GN=COX5B PE=1 SV=2 - [COX5B_HUMAN]	55.04	1	7	7	22	3.39071e+07	3.45581e+07	26.3538	35.66	6	11	29.854	55.04	7	11	129	13.6869	8.80713
P63000	Ras-related C3 botulinum toxin substrate 1 OS=Homo sapiens GN=RAC1 PE=1 SV=1 - [RAC1_HUMAN]	40.63	10	5	9	22	1.04283e+07	2.84217e+07	22.8378	34.38	7	11	31.182	36.46	7	11	192	21.4362	8.49951
G3V576	Heterogeneous nuclear ribonucleoproteins C1/C2 OS=Homo sapiens GN=HNRNPC PE=1 SV=1 - [G3V576_HUMAN]	29.87	22	7	7	21	9.71516e+06	2.02576e+07	26.5509	25.97	6	10	28.3532	29.44	6	11	231	25.2411	9.81787
Q15746	Myosin light chain kinase, smooth muscle OS=Homo sapiens GN=MYLK PE=1 SV=4 - [MYLK_HUMAN]	7.89	24	12	12	21	2.55838e+06	8.57863e+06	21.5965	4.96	9	10	22.9869	6.79	10	11	1914	210.583	6.15088
P43155	Carnitine O-acetyltransferase OS=Homo sapiens GN=CRAT PE=1 SV=5 - [CACP_HUMAN]	22.04	4	12	12	20	6.00657e+06	5.56652e+06	19.1133	17.57	9	9	25.9833	15.18	9	11	626	70.8123	8.44092
Q12955	Ankyrin-3 OS=Homo sapiens GN=ANK3 PE=1 SV=3 - [ANK3_HUMAN]	4.36	14	10	15	20	2.96182e+06	2.9077e+06	16.5176	1.92	8	9	20.3354	3.27	11	11	4377	480.113	6.49365
P14854	Cytochrome c oxidase subunit 6B1 OS=Homo sapiens GN=COX6B1 PE=1 SV=2 - [CX6B1_HUMAN]	75.58	2	6	6	19	2.52884e+07	4.01976e+07	14.2055	75.58	5	8	22.4934	75.58	6	11	86	10.1857	7.04932
Q56VL3	OCIA domain-containing protein 2 OS=Homo sapiens GN=OCIAD2 PE=1 SV=1 - [OCAD2_HUMAN]	48.7	3	8	8	19	6.92167e+06	1.65834e+07	13.8606	33.12	6	8	27.3246	48.7	8	11	154	16.9426	9.02686
P62826	GTP-binding nuclear protein Ran OS=Homo sapiens GN=RAN PE=1 SV=3 - [RAN_HUMAN]	42.59	6	9	9	19	1.16365e+07	2.13021e+07	18.741	33.8	6	8	32.6614	42.59	9	11	216	24.4076	7.48877
Q13825	Methylglutaconyl-CoA hydratase, mitochondrial OS=Homo sapiens GN=AUH PE=1 SV=1 - [AUHM_HUMAN]	22.71	1	7	7	19	5.87988e+06	1.1539e+07	17.1366	20.65	6	8	28.8646	20.06	6	11	339	35.5862	9.48096
Q13162	Peroxiredoxin-4 OS=Homo sapiens GN=PRDX4 PE=1 SV=1 - [PRDX4_HUMAN]	18.45	3	2	5	19	2.55415e+07	6.46228e+07	19.3381	7.01	3	8	24.5456	18.45	5	11	271	30.5208	6.29053
O14773	Tripeptidyl-peptidase 1 OS=Homo sapiens GN=TPP1 PE=1 SV=2 - [TPP1_HUMAN]	16.7	1	6	6	19	1.0825e+07	3.36494e+07	18.191	8.7	4	8	27.9842	16.7	6	11	563	61.2096	6.48096
A0A087X1J7	Glutathione peroxidase OS=Homo sapiens GN=GPX3 PE=1 SV=1 - [A0A087X1J7_HUMAN]	36.89	5	8	8	18	1.07444e+07	2.33876e+07	16.2614	29.33	5	7	22.4677	36.89	8	11	225	25.386	8.1333
F5H5N1	NADH dehydrogenase [ubiquinone] iron-sulfur protein 7, mitochondrial OS=Homo sapiens GN=NDUFS7 PE=1 SV=1 - [F5H5N1_HUMAN]	30.77	5	5	5	18	4.19567e+06	9.54974e+06	16.4596	18.13	4	7	24.8452	30.22	4	11	182	19.7569	9.49561
H3BS10	Beta-hexosaminidase OS=Homo sapiens GN=HEXA PE=1 SV=1 - [H3BS10_HUMAN]	25.93	6	11	12	18	1.51928e+06	5.07652e+06	13.3086	16.31	7	7	24.9604	20.63	10	11	509	58.4032	5.24951
H7C3P4	N-acetylglucosamine-6-sulfatase OS=Homo sapiens GN=GNS PE=1 SV=1 - [H7C3P4_HUMAN]	18.95	5	8	8	18	4.39182e+06	1.65414e+07	9.57179	13.71	6	7	15.8188	16.53	7	11	496	56.3378	7.91357
P07996	Thrombospondin-1 OS=Homo sapiens GN=THBS1 PE=1 SV=2 - [TSP1_HUMAN]	13.16	1	12	12	18	2.67001e+06	9.85966e+06	13.393	7.35	7	7	26.7707	9.06	8	11	1170	129.3	4.94482
Q9P0J0	NADH dehydrogenase [ubiquinone] 1 alpha subcomplex subunit 13 OS=Homo sapiens GN=NDUFA13 PE=1 SV=3 - [NDUAD_HUMAN]	63.19	6	7	7	17	3.94602e+06	1.59876e+07	13.9569	43.06	5	6	29.1338	63.19	7	11	144	16.6876	8.42627
O15173	Membrane-associated progesterone receptor component 2 OS=Homo sapiens GN=PGRMC2 PE=1 SV=1 - [PGRC2_HUMAN]	36.77	2	7	8	17	7.3262e+06	2.18873e+07	13.918	26.01	5	6	23.438	36.77	8	11	223	23.8037	4.88135
Q9UHQ9	NADH-cytochrome b5 reductase 1 OS=Homo sapiens GN=CYB5R1 PE=1 SV=1 - [NB5R1_HUMAN]	33.44	2	9	9	17	4.1e+06	8.71729e+06	10.1829	13.77	5	6	29.0134	33.44	8	11	305	34.0732	9.37842
P43034	Platelet-activating factor acetylhydrolase IB subunit alpha OS=Homo sapiens GN=PAFAH1B1 PE=1 SV=2 - [LIS1_HUMAN]	29.02	3	8	9	17	2.5558e+06	7.36242e+06	7.5733	19.51	5	6	24.4411	24.88	8	11	410	46.6082	7.37158
P30481	HLA class I histocompatibility antigen, B-44 alpha chain OS=Homo sapiens GN=HLA-B PE=1 SV=1 - [1B44_HUMAN]	23.48	32	3	7	17	4.16456e+06	1.49359e+07	8.73167	15.19	4	6	13.078	19.89	6	11	362	40.4561	6.03662
E7EQ29	Beta-galactosidase OS=Homo sapiens GN=GLB1 PE=1 SV=1 - [E7EQ29_HUMAN]	17.95	6	8	8	17	1.63446e+06	1.21481e+07	7.58031	11.9	5	6	28.4544	17.95	8	11	546	60.4445	6.84424
P09382	Galectin-1 OS=Homo sapiens GN=LGALS1 PE=1 SV=2 - [LEG1_HUMAN]	46.67	1	7	7	16	1.23486e+07	2.95179e+07	14.6381	37.78	4	5	24.8683	46.67	7	11	135	14.7062	5.50342
Q9BS26	Endoplasmic reticulum resident protein 44 OS=Homo sapiens GN=ERP44 PE=1 SV=1 - [ERP44_HUMAN]	31.77	1	9	10	16	1.68947e+06	8.14444e+06	8.51467	14.29	5	5	30.1535	24.88	7	11	406	46.9414	5.26221
Q9BXN1	Asporin OS=Homo sapiens GN=ASPN PE=1 SV=2 - [ASPN_HUMAN]	29.74	2	9	9	16	3.12037e+06	9.9551e+06	13.1734	15	5	5	21.9987	29.74	9	11	380	43.3893	7.07861
Q9UJU6	Drebrin-like protein OS=Homo sapiens GN=DBNL PE=1 SV=1 - [DBNL_HUMAN]	24.88	10	3	8	16	2.77051e+06	7.62837e+06	6.75355	14.19	5	5	20.3289	24.88	8	11	430	48.1776	5.04639
Q14152	Eukaryotic translation initiation factor 3 subunit A OS=Homo sapiens GN=EIF3A PE=1 SV=1 - [EIF3A_HUMAN]	10.56	1	11	11	16	733811	4.52436e+06	1.85403	4.63	5	5	20.2425	9.48	10	11	1382	166.468	6.78564
	>sp|CO5_HUMAN|	7.22	2	11	11	16	1.4701e+06	3.59117e+06	5.85767	3.28	5	5	17.4263	7.22	11	11	1676	188.212	6.52197
Q9H7Z7	Prostaglandin E synthase 2 OS=Homo sapiens GN=PTGES2 PE=1 SV=1 - [PGES2_HUMAN]	39.52	3	10	10	15	1.42384e+06	9.47276e+06	4.53591	12.2	4	4	27.9622	39.52	10	11	377	41.9167	9.15869
Q10713	Mitochondrial-processing peptidase subunit alpha OS=Homo sapiens GN=PMPCA PE=1 SV=2 - [MPPA_HUMAN]	29.71	2	11	11	15	1.81346e+06	7.68294e+06	4.43607	9.33	4	4	29.114	28	10	11	525	58.2156	6.91748
E7EV99	Alpha-adducin OS=Homo sapiens GN=ADD1 PE=1 SV=1 - [E7EV99_HUMAN]	28.8	11	12	12	15	4.01004e+06	4.62513e+06	6.71931	6.33	4	4	19.0473	25.95	10	11	632	70.0124	6.45557
Q9UNF0	Protein kinase C and casein kinase substrate in neurons protein 2 OS=Homo sapiens GN=PACSIN2 PE=1 SV=2 - [PACN2_HUMAN]	25.93	5	10	10	15	2.38967e+06	6.88652e+06	6.86838	7	3	4	27.9281	23.46	9	11	486	55.7039	5.19873
P00488	Coagulation factor XIII A chain OS=Homo sapiens GN=F13A1 PE=1 SV=4 - [F13A_HUMAN]	21.31	4	11	11	15	2.07684e+06	1.50635e+07	7.10115	7.51	4	4	24.0434	21.31	11	11	732	83.2146	6.0874
P39060	Collagen alpha-1(XVIII) chain OS=Homo sapiens GN=COL18A1 PE=1 SV=5 - [COIA1_HUMAN]	9.29	3	9	9	15	1.92849e+06	1.88374e+07	4.71081	3.31	4	4	33.3315	9.29	9	11	1754	178.077	6.01123
P61019	Ras-related protein Rab-2A OS=Homo sapiens GN=RAB2A PE=1 SV=1 - [RAB2A_HUMAN]	45.75	5	4	7	14	3.7179e+06	1.36146e+07	6.67605	21.7	3	3	32.9045	45.75	7	11	212	23.5308	6.53662
Q16543	Hsp90 co-chaperone Cdc37 OS=Homo sapiens GN=CDC37 PE=1 SV=1 - [CDC37_HUMAN]	29.63	5	9	9	14	2.10905e+06	9.90019e+06	5.04685	11.38	3	3	22.695	29.63	9	11	378	44.44	5.24951
P01008	Antithrombin-III OS=Homo sapiens GN=SERPINC1 PE=1 SV=1 - [ANT3_HUMAN]	19.61	2	8	8	12	0	7.24047e+06	2.72702	3.66	1	1	11.2207	19.61	8	11	464	52.5689	6.7124
P51911	Calponin-1 OS=Homo sapiens GN=CNN1 PE=1 SV=2 - [CNN1_HUMAN]	39.73	8	9	9	11	0	1.4997e+07		0			27.0861	39.73	9	11	297	33.1496	9.0708
Q8NE62	Choline dehydrogenase, mitochondrial OS=Homo sapiens GN=CHDH PE=1 SV=2 - [CHDH_HUMAN]	41.75	3	19	19	41	1.55952e+07	5.2468e+06	57.8435	41.75	19	31	22.9075	20.54	10	10	594	65.3171	8.27979
Q5SZC6	Guanine deaminase OS=Homo sapiens GN=GDA PE=1 SV=1 - [Q5SZC6_HUMAN]	40.97	3	1	11	25	8.01227e+06	8.58998e+06	28.5472	38.42	10	15	26.4457	27.74	7	10	393	44.1611	5.32568
P22033	Methylmalonyl-CoA mutase, mitochondrial OS=Homo sapiens GN=MUT PE=1 SV=4 - [MUTA_HUMAN]	19.73	1	12	12	25	5.20506e+06	6.26701e+06	32.8097	18.4	11	15	29.7637	14.4	8	10	750	83.0818	6.93213
Q9UHE5	N-acetyltransferase 8 OS=Homo sapiens GN=NAT8 PE=1 SV=2 - [NAT8_HUMAN]	29.07	2	7	7	22	1.85292e+07	1.10433e+07	29.1947	25.99	6	12	25.2072	29.07	6	10	227	25.6025	8.90967
Q53H82	Endoribonuclease LACTB2 OS=Homo sapiens GN=LACTB2 PE=1 SV=2 - [LACB2_HUMAN]	44.1	1	12	12	21	5.00453e+06	6.83634e+06	18.5691	39.93	9	11	23.5604	40.97	9	10	288	32.7849	6.80029
Q96RQ3	Methylcrotonoyl-CoA carboxylase subunit alpha, mitochondrial OS=Homo sapiens GN=MCCC1 PE=1 SV=3 - [MCCA_HUMAN]	30.21	6	15	15	21	7.90759e+06	5.87322e+06	21.3319	18.34	10	11	19.3749	18.76	9	10	725	80.4219	7.78174
P30050	60S ribosomal protein L12 OS=Homo sapiens GN=RPL12 PE=1 SV=1 - [RL12_HUMAN]	43.03	1	5	5	20	8.89981e+06	1.38617e+07	22.9061	43.03	5	10	26.4296	43.03	5	10	165	17.8075	9.42236
Q969I3	Glycine N-acyltransferase-like protein 1 OS=Homo sapiens GN=GLYATL1 PE=1 SV=1 - [GLYL1_HUMAN]	34.77	5	10	10	20	1.09904e+07	2.3325e+07	19.2701	28.81	6	10	16.8947	32.12	8	10	302	35.0784	6.87354
Q9UBR2	Cathepsin Z OS=Homo sapiens GN=CTSZ PE=1 SV=1 - [CATZ_HUMAN]	32.34	1	8	8	19	1.73824e+07	3.20598e+07	19.7222	27.06	7	9	26.6683	31.35	7	10	303	33.8462	7.10791
E9PGF5	Tensin-1 OS=Homo sapiens GN=TNS1 PE=1 SV=1 - [E9PGF5_HUMAN]	11.9	13	12	12	19	3.67377e+06	6.54115e+06	15.1864	8.17	9	9	18.5582	9.74	9	10	1714	183.11	7.75244
Q96IU4	Protein ABHD14B OS=Homo sapiens GN=ABHD14B PE=1 SV=1 - [ABHEB_HUMAN]	47.14	3	6	6	18	8.50288e+06	1.68945e+07	20.5516	28.1	4	8	23.6966	36.67	5	10	210	22.3316	6.40479
H0YI09	Methyltransferase-like protein 7A (Fragment) OS=Homo sapiens GN=METTL7A PE=1 SV=1 - [H0YI09_HUMAN]	37.7	3	8	8	18	1.86627e+07	6.89949e+07	14.7535	34.02	6	8	31.7315	30.33	6	10	244	28.2795	8.38232
Q9BR76	Coronin-1B OS=Homo sapiens GN=CORO1B PE=1 SV=1 - [COR1B_HUMAN]	33.13	5	10	10	18	4.04406e+06	1.10619e+07	17.2668	20.45	7	8	22.3893	23.93	8	10	489	54.2003	5.88428
P36578	60S ribosomal protein L4 OS=Homo sapiens GN=RPL4 PE=1 SV=5 - [RL4_HUMAN]	27.4	4	9	9	18	4.10743e+06	1.14147e+07	13.9796	12.65	5	8	18.3703	24.12	8	10	427	47.6674	11.063
Q14240	Eukaryotic initiation factor 4A-II OS=Homo sapiens GN=EIF4A2 PE=1 SV=2 - [IF4A2_HUMAN]	25.8	13	2	9	18	1.10736e+07	1.61893e+07	17.4011	22.11	7	8	26.0001	23.83	8	10	407	46.3728	5.47803
Q93050	V-type proton ATPase 116 kDa subunit a isoform 1 OS=Homo sapiens GN=ATP6V0A1 PE=1 SV=3 - [VPP1_HUMAN]	14.34	9	11	11	18	3.108e+06	8.14362e+06	12.6091	8.12	7	8	16.1721	13.14	10	10	837	96.3501	6.43018
O43390	Heterogeneous nuclear ribonucleoprotein R OS=Homo sapiens GN=HNRNPR PE=1 SV=1 - [HNRPR_HUMAN]	13.9	2	4	9	18	5.36595e+06	1.29249e+07	13.5244	10.27	7	8	22.12	12.16	8	10	633	70.8993	8.1333
O75380	NADH dehydrogenase [ubiquinone] iron-sulfur protein 6, mitochondrial OS=Homo sapiens GN=NDUFS6 PE=1 SV=1 - [NDUS6_HUMAN]	61.29	2	5	5	17	5.52916e+06	2.08941e+07	16.844	61.29	5	7	26.3097	61.29	5	10	124	13.7028	8.27979
Q13113	PDZK1-interacting protein 1 OS=Homo sapiens GN=PDZK1IP1 PE=1 SV=1 - [PDZ1I_HUMAN]	34.21	1	4	4	17	9.23386e+06	2.69304e+07	17.7437	34.21	3	7	26.9972	34.21	4	10	114	12.2191	4.83057
E9PCY7	Heterogeneous nuclear ribonucleoprotein H OS=Homo sapiens GN=HNRNPH1 PE=1 SV=1 - [E9PCY7_HUMAN]	26.11	23	3	8	17	7.90001e+06	1.33086e+07	22.5151	19.11	6	7	22.9837	21.68	7	10	429	47.0574	6.34131
Q13418	Integrin-linked protein kinase OS=Homo sapiens GN=ILK PE=1 SV=2 - [ILK_HUMAN]	26.11	3	10	10	17	1.47685e+06	6.43255e+06	8.47085	7.52	4	7	23.4202	24.56	9	10	452	51.3859	8.07471
Q13200	26S proteasome non-ATPase regulatory subunit 2 OS=Homo sapiens GN=PSMD2 PE=1 SV=3 - [PSMD2_HUMAN]	19.49	3	11	11	17	2.46213e+06	4.96178e+06	11.2252	11.78	7	7	22.8164	15.75	9	10	908	100.136	5.19873
Q9Y4G6	Talin-2 OS=Homo sapiens GN=TLN2 PE=1 SV=4 - [TLN2_HUMAN]	4.21	4	2	9	17	6.99539e+06	1.83636e+07	16.2411	2.32	5	7	22.7534	3.66	8	10	2542	271.443	5.56689
P27695	DNA-(apurinic or apyrimidinic site) lyase OS=Homo sapiens GN=APEX1 PE=1 SV=2 - [APEX1_HUMAN]	39.94	10	8	8	16	1.96706e+06	1.4108e+07	9.64267	27.67	6	6	26.5237	34.59	7	10	318	35.5322	8.11865
A0A140T8W8	HLA class I histocompatibility antigen, A-3 alpha chain OS=Homo sapiens GN=HLA-A PE=1 SV=1 - [A0A140T8W8_HUMAN]	33.11	17	1	7	16	3.56068e+06	2.1816e+07	8.3963	15.05	4	6	20.2317	33.11	7	10	299	34.4047	6.23975
Q96NB2	Sideroflexin-2 OS=Homo sapiens GN=SFXN2 PE=1 SV=2 - [SFXN2_HUMAN]	31.06	9	8	8	16	8.70896e+06	9.69114e+06	14.6812	19.25	5	6	22.0546	24.53	6	10	322	36.2077	9.40771
Q15366	Poly(rC)-binding protein 2 OS=Homo sapiens GN=PCBP2 PE=1 SV=1 - [PCBP2_HUMAN]	30.96	10	3	7	16	1.42956e+07	2.79858e+07	13.5301	18.9	5	6	26.6864	26.58	6	10	365	38.5556	6.78564
P25788	Proteasome subunit alpha type-3 OS=Homo sapiens GN=PSMA3 PE=1 SV=2 - [PSA3_HUMAN]	24.31	4	6	6	16	5.18802e+06	1.15894e+07	10.8815	18.82	5	6	20.1091	24.31	6	10	255	28.4151	5.32568
B5MCP9	40S ribosomal protein S7 OS=Homo sapiens GN=RPS7 PE=1 SV=1 - [B5MCP9_HUMAN]	43.32	2	6	6	15	3.32481e+06	1.27226e+07	13.5616	22.99	3	5	28.6083	43.32	6	10	187	21.2988	10.272
H0YMZ1	Proteasome subunit alpha type (Fragment) OS=Homo sapiens GN=PSMA4 PE=1 SV=8 - [H0YMZ1_HUMAN]	42.73	11	7	7	15	3.75311e+06	1.2175e+07	11.8063	14.55	3	5	20.292	42.73	7	10	220	24.5104	6.771
Q03591	Complement factor H-related protein 1 OS=Homo sapiens GN=CFHR1 PE=1 SV=2 - [FHR1_HUMAN]	34.24	3	4	8	15	4.30848e+06	2.05398e+07	10.2265	11.21	3	5	30.1265	34.24	8	10	330	37.626	7.38623
P61026	Ras-related protein Rab-10 OS=Homo sapiens GN=RAB10 PE=1 SV=1 - [RAB10_HUMAN]	27	38	3	6	15	1.77669e+07	4.34055e+07	11.7702	16.5	3	5	25.1078	27	6	10	200	22.5266	8.38232
P62753	40S ribosomal protein S6 OS=Homo sapiens GN=RPS6 PE=1 SV=1 - [RS6_HUMAN]	25.7	3	7	7	15	5.70382e+06	1.41134e+07	5.43577	16.06	4	5	26.4217	25.7	6	10	249	28.663	10.8433
Q86X76	Nitrilase homolog 1 OS=Homo sapiens GN=NIT1 PE=1 SV=2 - [NIT1_HUMAN]	25.08	1	8	8	15	3.2095e+06	8.77549e+06	7.29188	17.13	5	5	23.0148	25.08	8	10	327	35.8732	7.73779
O43776	Asparagine--tRNA ligase, cytoplasmic OS=Homo sapiens GN=NARS PE=1 SV=1 - [SYNC_HUMAN]	24.27	7	9	9	15	3.1824e+06	1.43876e+07	11.9551	11.13	5	5	29.611	24.27	9	10	548	62.9025	6.25244
P16435	NADPH--cytochrome P450 reductase OS=Homo sapiens GN=POR PE=1 SV=2 - [NCPR_HUMAN]	20.68	3	10	10	15	2.1428e+06	5.57381e+06	9.93295	9.01	5	5	17.58	19.5	9	10	677	76.6413	5.57959
A0A140T936	Valine--tRNA ligase (Fragment) OS=Homo sapiens GN=VARS PE=1 SV=1 - [A0A140T936_HUMAN]	12.76	7	10	10	15	2.5568e+06	9.43481e+06	9.85751	4.82	5	5	21.0249	12.09	9	10	1183	131.857	7.48877
P39019	40S ribosomal protein S19 OS=Homo sapiens GN=RPS19 PE=1 SV=2 - [RS19_HUMAN]	42.76	6	6	6	14	6.31281e+06	1.17163e+07	10.4709	26.21	4	4	24.9778	42.76	6	10	145	16.0505	10.3159
H0YN26	Acidic leucine-rich nuclear phosphoprotein 32 family member A OS=Homo sapiens GN=ANP32A PE=1 SV=1 - [H0YN26_HUMAN]	41.24	5	6	8	14	7.15525e+06	2.23009e+07	6.98464	22.6	3	4	25.6568	36.72	7	10	177	19.9851	4.57666
E9PL71	Elongation factor 1-delta (Fragment) OS=Homo sapiens GN=EEF1D PE=1 SV=1 - [E9PL71_HUMAN]	41.18	3	1	7	14	5.10128e+06	1.57219e+07	9.24091	32.09	4	4	21.2313	41.18	7	10	187	20.8063	5.0083
P09669	Cytochrome c oxidase subunit 6C OS=Homo sapiens GN=COX6C PE=1 SV=2 - [COX6C_HUMAN]	37.33	1	5	5	14	2.29722e+07	4.25456e+07	9.22994	20	2	4	23.5276	37.33	5	10	75	8.77569	10.3892
P35237	Serpin B6 OS=Homo sapiens GN=SERPINB6 PE=1 SV=3 - [SPB6_HUMAN]	35.64	5	10	10	14	2.14516e+06	5.6383e+06	8.44857	15.16	4	4	20.4373	29.79	8	10	376	42.5941	5.2749
P12429	Annexin A3 OS=Homo sapiens GN=ANXA3 PE=1 SV=3 - [ANXA3_HUMAN]	31.89	6	8	8	14	1.89664e+06	7.73046e+06	3.95562	15.48	4	4	22.3602	31.89	8	10	323	36.3527	5.92236
Q9UQ80	Proliferation-associated protein 2G4 OS=Homo sapiens GN=PA2G4 PE=1 SV=3 - [PA2G4_HUMAN]	23.6	4	9	9	14	4.13795e+06	7.6983e+06	9.61059	9.39	3	4	19.7415	23.6	9	10	394	43.7592	6.55127
Q14165	Malectin OS=Homo sapiens GN=MLEC PE=1 SV=1 - [MLEC_HUMAN]	22.26	4	6	6	14	1.3864e+06	6.83952e+06	9.33754	13.01	3	4	27.4717	22.26	6	10	292	32.2136	5.41455
P27816	Microtubule-associated protein 4 OS=Homo sapiens GN=MAP4 PE=1 SV=3 - [MAP4_HUMAN]	19.88	7	12	12	14	2.24944e+06	3.76993e+06	4.98682	5.38	4	4	20.8227	15.8	9	10	1152	120.93	5.42725
A8MUD9	60S ribosomal protein L7 OS=Homo sapiens GN=RPL7 PE=1 SV=1 - [A8MUD9_HUMAN]	49.04	4	9	9	13	2.08413e+06	9.62612e+06	8.24616	17.79	3	3	21.0295	45.67	8	10	208	24.4174	10.6675
Q9H4M9	EH domain-containing protein 1 OS=Homo sapiens GN=EHD1 PE=1 SV=2 - [EHD1_HUMAN]	27.72	7	5	10	13	1.87133e+06	6.03187e+06	6.6235	6.37	3	3	28.4526	23.41	8	10	534	60.5887	6.82959
E9PAM4	Uncharacterized protein OS=Homo sapiens PE=1 SV=1 - [E9PAM4_HUMAN]	14.25	3	1	5	13	1.35685e+07	1.76851e+07	6.80274	4.23	2	3	20.7713	14.25	5	10	449	51.1865	8.77783
E7EMB6	Aspartyl aminopeptidase OS=Homo sapiens GN=DNPEP PE=1 SV=2 - [E7EMB6_HUMAN]	33.41	9	9	9	12	1.32099e+06	8.96772e+06	4.29187	7.56	2	2	24.225	33.41	9	10	410	44.964	6.78564
E9PEM5	Lipopolysaccharide-responsive and beige-like anchor protein OS=Homo sapiens GN=LRBA PE=1 SV=1 - [E9PEM5_HUMAN]	4.35	3	6	9	12	845452	3.65186e+06	3.63979	1.05	2	2	17.9799	4.35	9	10	2575	286.793	5.51611
P27216	Annexin A13 OS=Homo sapiens GN=ANXA13 PE=1 SV=3 - [ANX13_HUMAN]	44.3	2	10	11	11	110676	7.8787e+06	1.77313	3.48	1	1	20.8303	40.82	10	10	316	35.3932	5.60498
B1ANR0	Polyadenylate-binding protein OS=Homo sapiens GN=PABPC4 PE=1 SV=1 - [B1ANR0_HUMAN]	16.59	7	2	7	11	596499	1.17338e+07	0	2.6	1	1	18.0134	16.59	7	10	615	67.9279	9.45166
P06756	Integrin alpha-V OS=Homo sapiens GN=ITGAV PE=1 SV=2 - [ITAV_HUMAN]	13.45	2	10	10	10	0	4.6247e+06		0			24.4278	13.45	10	10	1048	115.964	5.68115
O94925	Glutaminase kidney isoform, mitochondrial OS=Homo sapiens GN=GLS PE=1 SV=1 - [GLSK_HUMAN]	38.27	9	19	19	36	1.60924e+07	4.96504e+06	56.9029	38.27	19	27	22.0057	18.98	8	9	669	73.4139	7.76709
K7EJE8	Lon protease homolog, mitochondrial OS=Homo sapiens GN=LONP1 PE=1 SV=1 - [K7EJE8_HUMAN]	33.66	6	21	21	33	7.10479e+06	3.50029e+06	50.5715	27.86	19	24	17.95	14.48	8	9	829	93.238	6.49365
Q9BTZ2	Dehydrogenase/reductase SDR family member 4 OS=Homo sapiens GN=DHRS4 PE=1 SV=3 - [DHRS4_HUMAN]	44.96	11	11	11	23	2.59766e+07	1.70407e+07	39.5757	44.96	10	14	25.8158	29.86	6	9	278	29.5184	8.55811
Q86WA6	Valacyclovir hydrolase OS=Homo sapiens GN=BPHL PE=1 SV=1 - [BPHL_HUMAN]	50.52	3	11	11	22	1.37254e+07	2.07524e+07	30.1359	30.58	8	13	23.0934	41.58	6	9	291	32.522	9.14404
Q00839	Heterogeneous nuclear ribonucleoprotein U OS=Homo sapiens GN=HNRNPU PE=1 SV=6 - [HNRPU_HUMAN]	20.36	2	12	12	22	1.27498e+07	1.57459e+07	23.8929	20.24	11	13	15.1377	14.67	7	9	825	90.528	5.99854
P50416	Carnitine O-palmitoyltransferase 1, liver isoform OS=Homo sapiens GN=CPT1A PE=1 SV=2 - [CPT1A_HUMAN]	16.95	5	11	11	21	8.55259e+06	7.13124e+06	19.4281	15.91	10	12	16.578	10.09	7	9	773	88.3107	8.646
Q9UBX3	Mitochondrial dicarboxylate carrier OS=Homo sapiens GN=SLC25A10 PE=1 SV=2 - [DIC_HUMAN]	44.95	4	2	9	19	5.20821e+06	1.133e+07	21.3455	37.28	8	10	21.6692	35.54	7	9	287	31.2623	9.53955
D6RB81	Alpha-methylacyl-CoA racemase OS=Homo sapiens GN=AMACR PE=1 SV=1 - [D6RB81_HUMAN]	41.96	5	11	11	18	7.66633e+06	1.02265e+07	11.7306	31.88	8	9	19.1479	34.88	8	9	367	40.6488	6.44287
Q86YB7	Enoyl-CoA hydratase domain-containing protein 2, mitochondrial OS=Homo sapiens GN=ECHDC2 PE=1 SV=2 - [ECHD2_HUMAN]	36.64	3	8	8	18	5.82299e+06	1.1386e+07	20.6098	32.53	6	9	20.611	33.9	7	9	292	31.1064	8.71924
B4DLN1	cDNA FLJ60124, highly similar to Mitochondrial dicarboxylate carrier OS=Homo sapiens PE=2 SV=1 - [B4DLN1_HUMAN]	32.13	3	2	9	18	5.20821e+06	1.18703e+07	19.5466	21.95	7	9	22.6666	26.02	7	9	442	48.0687	9.5249
Q99733	Nucleosome assembly protein 1-like 4 OS=Homo sapiens GN=NAP1L4 PE=1 SV=1 - [NP1L4_HUMAN]	26.67	13	7	8	18	3.06732e+06	6.45429e+06	21.83	18.93	6	9	19.0934	21.87	6	9	375	42.7969	4.69092
Q9Y646	Carboxypeptidase Q OS=Homo sapiens GN=CPQ PE=1 SV=1 - [CBPQ_HUMAN]	19.7	5	7	7	18	7.92751e+06	9.6154e+06	22.9473	14.62	5	9	21.1041	19.7	7	9	472	51.8545	6.17627
P19105	Myosin regulatory light chain 12A OS=Homo sapiens GN=MYL12A PE=1 SV=2 - [ML12A_HUMAN]	40.35	4	3	7	17	9.88079e+06	1.70702e+07	18.4548	23.98	5	8	18.5136	33.92	6	9	171	19.7815	4.80518
Q96FW1	Ubiquitin thioesterase OTUB1 OS=Homo sapiens GN=OTUB1 PE=1 SV=2 - [OTUB1_HUMAN]	37.64	6	7	7	17	2.2657e+06	4.52374e+06	17.0527	28.04	6	8	23.2213	37.64	7	9	271	31.2644	4.94482
D6R9P3	Heterogeneous nuclear ribonucleoprotein A/B OS=Homo sapiens GN=HNRNPAB PE=1 SV=1 - [D6R9P3_HUMAN]	26.79	4	6	7	17	6.97024e+06	1.22051e+07	16.3767	19.29	5	8	24.1431	22.14	5	9	280	30.284	7.91357
P05090	Apolipoprotein D OS=Homo sapiens GN=APOD PE=1 SV=1 - [APOD_HUMAN]	23.81	3	5	5	17	9.37425e+06	1.65435e+07	19.0188	23.81	5	8	23.9096	23.81	5	9	189	21.2618	5.14795
P05387	60S acidic ribosomal protein P2 OS=Homo sapiens GN=RPLP2 PE=1 SV=1 - [RLA2_HUMAN]	82.61	2	8	8	16	1.28128e+07	2.2847e+07	19.4233	48.7	6	7	30.8316	82.61	7	9	115	11.6578	4.53857
C9J1Z8	ADP-ribosylation factor 5 (Fragment) OS=Homo sapiens GN=ARF5 PE=1 SV=1 - [C9J1Z8_HUMAN]	43.33	5	2	6	16	4.29681e+06	1.71197e+07	16.8219	34	4	7	22.8466	43.33	6	9	150	17.0959	7.34229
E9PBS1	Multifunctional protein ADE2 (Fragment) OS=Homo sapiens GN=PAICS PE=1 SV=1 - [E9PBS1_HUMAN]	25.42	3	9	9	16	2.22544e+06	6.0977e+06	14.6145	15.5	6	7	19.9671	25.42	9	9	413	45.6224	6.68311
Q14315	Filamin-C OS=Homo sapiens GN=FLNC PE=1 SV=3 - [FLNC_HUMAN]	3.05	1	1	7	16	8.22156e+06	3.24404e+07	8.54396	2.2	5	7	23.2881	2.61	6	9	2725	290.841	5.97314
E9PKF3	Acetyl-CoA acetyltransferase, mitochondrial (Fragment) OS=Homo sapiens GN=ACAT1 PE=1 SV=1 - [E9PKF3_HUMAN]	75.93	1	1	3	15	3.20406e+07	8.65924e+07	20.9242	75.93	3	6	29.1406	75.93	3	9	54	5.41562	8.36768
P56537	Eukaryotic translation initiation factor 6 OS=Homo sapiens GN=EIF6 PE=1 SV=1 - [IF6_HUMAN]	52.24	6	7	7	15	4.24074e+06	1.06792e+07	11.3022	22.86	4	6	24.6261	52.24	7	9	245	26.5822	4.67822
A0A0C4DGS1	Dolichyl-diphosphooligosaccharide--protein glycosyltransferase 48 kDa subunit OS=Homo sapiens GN=DDOST PE=1 SV=1 - [A0A0C4DGS1_HUMAN]	32.8	3	9	9	15	2.53249e+06	1.71682e+07	9.35266	12.07	5	6	25.2347	31.21	8	9	439	48.769	5.69385
Q9NUB1	Acetyl-coenzyme A synthetase 2-like, mitochondrial OS=Homo sapiens GN=ACSS1 PE=1 SV=2 - [ACS2L_HUMAN]	15.24	2	8	8	15	1.97075e+06	5.94605e+06	9.65383	8.85	5	6	19.8037	13.64	7	9	689	74.809	7.10791
P33176	Kinesin-1 heavy chain OS=Homo sapiens GN=KIF5B PE=1 SV=1 - [KINH_HUMAN]	12.36	5	8	8	15	1.85524e+06	4.30469e+06	13.5785	6.54	5	6	24.3439	12.36	8	9	963	109.617	6.50732
P61970	Nuclear transport factor 2 OS=Homo sapiens GN=NUTF2 PE=1 SV=1 - [NTF2_HUMAN]	51.18	2	4	4	14	4.49908e+06	1.37039e+07	7.88402	51.18	4	5	19.0127	51.18	4	9	127	14.469	5.37646
E9PBT8	Sulfatase-modifying factor 2 OS=Homo sapiens GN=SUMF2 PE=1 SV=1 - [E9PBT8_HUMAN]	35.78	13	6	6	14	1.5198e+06	3.03508e+06	4.41048	16.38	3	5	19.5764	35.78	6	9	232	25.8128	6.81494
P28066	Proteasome subunit alpha type-5 OS=Homo sapiens GN=PSMA5 PE=1 SV=3 - [PSA5_HUMAN]	35.68	1	6	6	14	6.52676e+06	2.62181e+07	14.1903	21.58	4	5	28.1573	35.68	6	9	241	26.3942	4.79248
P17900	Ganglioside GM2 activator OS=Homo sapiens GN=GM2A PE=1 SV=4 - [SAP3_HUMAN]	30.05	3	7	7	14	4.50789e+06	1.00422e+07	11.5311	13.99	4	5	22.5332	30.05	7	9	193	20.8247	5.31299
P15880	40S ribosomal protein S2 OS=Homo sapiens GN=RPS2 PE=1 SV=2 - [RS2_HUMAN]	29.69	9	8	8	14	5.31255e+06	1.45008e+07	10.7767	23.21	5	5	21.2814	29.35	7	9	293	31.3046	10.2427
C9JVN9	L-2-hydroxyglutarate dehydrogenase, mitochondrial OS=Homo sapiens GN=L2HGDH PE=1 SV=1 - [C9JVN9_HUMAN]	22.9	4	8	8	14	2.84137e+06	6.73755e+06	9.54887	10.43	4	5	23.4965	19.73	7	9	441	48.4439	8.646
P49591	Serine--tRNA ligase, cytoplasmic OS=Homo sapiens GN=SARS PE=1 SV=3 - [SYSC_HUMAN]	21.4	2	9	9	14	1.24199e+06	5.40991e+06	7.18024	9.92	4	5	13.3516	18.87	8	9	514	58.7401	6.43018
P49257	Protein ERGIC-53 OS=Homo sapiens GN=LMAN1 PE=1 SV=2 - [LMAN1_HUMAN]	19.8	1	6	6	14	4.0536e+06	8.22474e+06	10.364	9.41	4	5	16.7458	19.8	6	9	510	57.513	6.771
O00499	Myc box-dependent-interacting protein 1 OS=Homo sapiens GN=BIN1 PE=1 SV=1 - [BIN1_HUMAN]	19.22	7	7	7	14	3.72265e+06	8.76256e+06	15.5254	8.6	3	5	23.3087	19.22	7	9	593	64.6594	5.05908
H0Y8B3	Adenosylhomocysteinase (Fragment) OS=Homo sapiens GN=AHCYL2 PE=1 SV=1 - [H0Y8B3_HUMAN]	18.34	2	2	8	14	3.00529e+06	8.55052e+06	13.4549	6.56	3	5	16.977	18.34	7	9	518	58.0771	8.04541
P04196	Histidine-rich glycoprotein OS=Homo sapiens GN=HRG PE=1 SV=1 - [HRG_HUMAN]	17.14	1	7	7	14	890307	8.13948e+06	3.57306	8.76	4	5	22.0738	17.14	7	9	525	59.5409	7.50342
V9GYG9	Apolipoprotein A-II (Fragment) OS=Homo sapiens GN=APOA2 PE=1 SV=1 - [V9GYG9_HUMAN]	44.21	6	4	4	13	1.09587e+07	1.95323e+07	10.9574	23.16	3	4	23.0037	44.21	4	9	95	10.6426	6.62451
A0A140T933	HLA class I histocompatibility antigen, A-3 alpha chain (Fragment) OS=Homo sapiens GN=HLA-A PE=1 SV=1 - [A0A140T933_HUMAN]	37.46	11	2	8	13	3.56068e+06	2.1816e+07	6.61702	11.37	3	4	18.6212	37.46	8	9	299	34.2457	6.7124
Q15599	Na(+)/H(+) exchange regulatory cofactor NHE-RF2 OS=Homo sapiens GN=SLC9A3R2 PE=1 SV=2 - [NHRF2_HUMAN]	37.09	5	8	8	13	1.90494e+06	7.3158e+06	2.84849	13.06	3	4	17.9079	37.09	8	9	337	37.391	7.92822
P28074	Proteasome subunit beta type-5 OS=Homo sapiens GN=PSMB5 PE=1 SV=3 - [PSB5_HUMAN]	32.7	2	7	7	13	1.63001e+06	5.79787e+06	8.86468	13.31	3	4	18.1146	32.7	7	9	263	28.4622	6.91748
Q5T8U3	60S ribosomal protein L7a (Fragment) OS=Homo sapiens GN=RPL7A PE=1 SV=1 - [Q5T8U3_HUMAN]	26.18	3	5	5	13	4.9671e+06	9.79359e+06	10.0627	18.85	3	4	22.4087	26.18	5	9	191	21.5314	11.019
Q9Y230	RuvB-like 2 OS=Homo sapiens GN=RUVBL2 PE=1 SV=3 - [RUVB2_HUMAN]	24.84	5	8	8	13	1.19662e+06	5.50442e+06	5.62537	8.42	3	4	18.056	24.84	8	9	463	51.1246	5.64307
P31146	Coronin-1A OS=Homo sapiens GN=CORO1A PE=1 SV=4 - [COR1A_HUMAN]	23.43	7	8	8	13	910273	4.53413e+06	5.83099	9.76	4	4	10.4867	23.43	8	9	461	50.9938	6.68311
Q05707	Collagen alpha-1(XIV) chain OS=Homo sapiens GN=COL14A1 PE=1 SV=3 - [COEA1_HUMAN]	6.79	5	10	10	13	1.31353e+06	2.78928e+06	5.93093	2.39	4	4	20.8221	6.18	9	9	1796	193.394	5.30029
P52566	Rho GDP-dissociation inhibitor 2 OS=Homo sapiens GN=ARHGDIB PE=1 SV=3 - [GDIR2_HUMAN]	63.18	5	8	8	12	1.73017e+06	3.0513e+07	4.3114	31.84	3	3	25.2121	63.18	8	9	201	22.9736	5.21143
Q9BVM4	Gamma-glutamylaminecyclotransferase OS=Homo sapiens GN=GGACT PE=1 SV=2 - [GGACT_HUMAN]	52.94	1	5	5	12	3.64904e+06	3.9244e+07	6.57644	16.99	2	3	22.9049	52.94	5	9	153	17.3178	6.87354
P46952	3-hydroxyanthranilate 3,4-dioxygenase OS=Homo sapiens GN=HAAO PE=1 SV=2 - [3HAO_HUMAN]	40.21	2	8	8	12	1.26964e+06	3.3669e+06	6.28827	10.84	3	3	18.3106	40.21	8	9	286	32.5355	5.88428
P29966	Myristoylated alanine-rich C-kinase substrate OS=Homo sapiens GN=MARCKS PE=1 SV=4 - [MARCS_HUMAN]	38.25	1	7	7	12	988695	6.57896e+06	7.0522	14.76	3	3	18.5758	38.25	7	9	332	31.5359	4.44971
Q96I15	Selenocysteine lyase OS=Homo sapiens GN=SCLY PE=1 SV=4 - [SCLY_HUMAN]	32.81	9	9	9	12	1.23149e+06	5.23315e+06	6.98063	10.79	3	3	22.1274	30.34	8	9	445	48.1186	7.12256
P62136	Serine/threonine-protein phosphatase PP1-alpha catalytic subunit OS=Homo sapiens GN=PPP1CA PE=1 SV=1 - [PP1A_HUMAN]	30.3	7	1	8	12	1.58862e+06	7.23836e+06	6.37957	12.73	3	3	19.4728	30.3	8	9	330	37.4878	6.32861
F8VYE8	Serine/threonine-protein phosphatase OS=Homo sapiens GN=PPP1CC PE=1 SV=1 - [F8VYE8_HUMAN]	30.26	11	1	8	12	1.58862e+06	7.21208e+06	6.37957	13.82	3	3	19.6888	30.26	8	9	304	34.9274	5.26221
Q07955	Serine/arginine-rich splicing factor 1 OS=Homo sapiens GN=SRSF1 PE=1 SV=2 - [SRSF1_HUMAN]	30.24	5	7	7	12	1.77305e+06	7.30772e+06	3.85211	13.31	3	3	21.8714	30.24	7	9	248	27.7278	10.3599
P34949	Mannose-6-phosphate isomerase OS=Homo sapiens GN=MPI PE=1 SV=2 - [MPI_HUMAN]	29.79	17	7	7	12	1.02257e+06	5.12729e+06	5.81195	7.33	2	3	14.2929	29.79	7	9	423	46.6258	5.94775
A0A0A0MTN9	NADPH:adrenodoxin oxidoreductase, mitochondrial OS=Homo sapiens GN=FDXR PE=1 SV=1 - [A0A0A0MTN9_HUMAN]	28.93	9	10	10	12	1.486e+06	1.46933e+07	2.20239	12.3	3	3	21.6688	26.88	9	9	439	47.9981	6.7417
Q8NBX0	Saccharopine dehydrogenase-like oxidoreductase OS=Homo sapiens GN=SCCPDH PE=1 SV=1 - [SCPDL_HUMAN]	25.64	1	6	6	12	2.45838e+06	1.30102e+07	4.8765	9.32	3	3	23.7331	25.64	6	9	429	47.1215	9.14404
Q16658	Fascin OS=Homo sapiens GN=FSCN1 PE=1 SV=3 - [FSCN1_HUMAN]	23.53	4	8	8	12	2.39299e+06	1.22364e+07	4.28428	8.72	3	3	25.2326	23.53	8	9	493	54.4961	7.23975
P31948	Stress-induced-phosphoprotein 1 OS=Homo sapiens GN=STIP1 PE=1 SV=1 - [STIP1_HUMAN]	21.73	4	10	10	12	1.13222e+06	5.81343e+06	4.11905	6.45	3	3	21.4777	18.78	9	9	543	62.5994	6.80029
O95782	AP-2 complex subunit alpha-1 OS=Homo sapiens GN=AP2A1 PE=1 SV=3 - [AP2A1_HUMAN]	12.28	2	4	9	12	1.09163e+06	4.63131e+06	7.37858	3.99	3	3	18.6122	10.44	8	9	977	107.478	7.03467
O43491	Band 4.1-like protein 2 OS=Homo sapiens GN=EPB41L2 PE=1 SV=1 - [E41L2_HUMAN]	11.74	11	8	8	12	1.56408e+06	6.69339e+06	0	4.48	3	3	21.1028	9.25	6	9	1005	112.519	5.43994
Q15691	Microtubule-associated protein RP/EB family member 1 OS=Homo sapiens GN=MAPRE1 PE=1 SV=3 - [MARE1_HUMAN]	45.52	1	7	7	11	2.88919e+06	7.49585e+06	7.75393	13.81	2	2	24.2217	45.52	7	9	268	29.9802	5.13525
P28482	Mitogen-activated protein kinase 1 OS=Homo sapiens GN=MAPK1 PE=1 SV=3 - [MK01_HUMAN]	27.5	2	4	7	11	592293	5.64196e+06	5.8193	8.33	2	2	22.001	27.5	7	9	360	41.3632	6.97607
Q14624	Inter-alpha-trypsin inhibitor heavy chain H4 OS=Homo sapiens GN=ITIH4 PE=1 SV=4 - [ITIH4_HUMAN]	14.73	3	8	8	11	1.44415e+06	1.11422e+07	4.85188	2.37	2	2	18.64	14.73	8	9	930	103.293	6.97607
E7ENL6	Collagen alpha-3(VI) chain OS=Homo sapiens GN=COL6A3 PE=1 SV=2 - [E7ENL6_HUMAN]	4.36	3	9	9	11	867617	2.51083e+06	1.80981	1.09	2	2	19.2089	4.36	9	9	2569	277.946	8.17725
A0A087X271	Calponin (Fragment) OS=Homo sapiens GN=CNN2 PE=1 SV=1 - [A0A087X271_HUMAN]	39.11	10	6	6	10	1.58376e+06	6.36995e+06	2.52635	6.15	1	1	16.3548	39.11	6	9	179	19.7448	8.79248
F5GZN3	Lactadherin OS=Homo sapiens GN=MFGE8 PE=1 SV=1 - [F5GZN3_HUMAN]	33.53	5	8	8	10	90735.1	9.38942e+06	1.71317	2.92	1	1	23.1381	33.53	8	9	343	38.3194	8.57275
P11117	Lysosomal acid phosphatase OS=Homo sapiens GN=ACP2 PE=1 SV=3 - [PPAL_HUMAN]	22.46	8	8	8	10	851263	3.55753e+06	1.96265	1.89	1	1	13.2642	22.46	8	9	423	48.3135	6.7417
Q9NY33	Dipeptidyl peptidase 3 OS=Homo sapiens GN=DPP3 PE=1 SV=2 - [DPP3_HUMAN]	21.44	4	8	8	10	1.3179e+06	7.65339e+06	1.95541	0.95	1	1	14.6305	20.49	7	9	737	82.5378	5.09717
Q9UGI8	Testin OS=Homo sapiens GN=TES PE=1 SV=1 - [TES_HUMAN]	20.43	3	7	7	10	354422	3.74849e+06	0	4.51	1	1	18.1038	20.43	7	9	421	47.9639	7.6792
Q15717	ELAV-like protein 1 OS=Homo sapiens GN=ELAVL1 PE=1 SV=2 - [ELAV1_HUMAN]	34.36	10	8	8	9	0	9.28389e+06		0			15.3493	34.36	8	9	326	36.0692	9.17334
P30711	Glutathione S-transferase theta-1 OS=Homo sapiens GN=GSTT1 PE=1 SV=4 - [GSTT1_HUMAN]	25	14	6	6	9	0	1.0689e+07		0			29.0334	25	6	9	240	27.3176	7.48877
P12955	Xaa-Pro dipeptidase OS=Homo sapiens GN=PEPD PE=1 SV=3 - [PEPD_HUMAN]	32.86	5	14	14	25	1.22382e+07	5.21111e+06	33.7071	30.63	12	17	22.6996	20.89	8	8	493	54.5129	5.99854
A0A1B0GTP7	Acid ceramidase OS=Homo sapiens GN=ASAH1 PE=1 SV=1 - [A0A1B0GTP7_HUMAN]	47.92	25	11	11	23	1.02468e+07	9.33591e+06	27.2443	47.92	11	15	16.2036	26.04	6	8	288	32.5527	7.62061
Q9UJ68	Mitochondrial peptide methionine sulfoxide reductase OS=Homo sapiens GN=MSRA PE=1 SV=1 - [MSRA_HUMAN]	55.32	5	10	10	20	9.22607e+06	7.20896e+06	27.8057	55.32	10	12	19.1055	35.74	6	8	235	26.1157	8.08936
	>sp|THIO_HUMAN|	52.88	2	7	7	20	2.09594e+07	1.74712e+07	25.5602	52.88	7	12	18.5901	44.23	6	8	104	11.5987	4.91943
A8K968	Band 4.1-like protein 3 OS=Homo sapiens GN=EPB41L3 PE=1 SV=1 - [A8K968_HUMAN]	19.44	13	9	9	19	6.88449e+06	8.34445e+06	27.0927	17.2	8	11	18.7875	17.46	8	8	756	84.6594	5.43994
P07602	Prosaposin OS=Homo sapiens GN=PSAP PE=1 SV=2 - [SAP_HUMAN]	11.83	4	7	7	19	5.34461e+07	7.76247e+07	23.9792	11.83	7	11	16.6417	8.78	5	8	524	58.0739	5.17334
B4DY09	Interleukin enhancer-binding factor 2 OS=Homo sapiens GN=ILF2 PE=1 SV=1 - [B4DY09_HUMAN]	31.82	4	10	10	18	3.39619e+06	5.9385e+06	13.9209	26.14	8	10	21.6383	20.45	6	8	352	38.8862	4.94482
O00757	Fructose-1,6-bisphosphatase isozyme 2 OS=Homo sapiens GN=FBP2 PE=1 SV=2 - [F16P2_HUMAN]	6.78	1	2	3	17	3.02875e+07	3.64642e+07	21.0078	6.78	3	9	20.7456	6.78	3	8	339	36.7199	7.2251
P07919	Cytochrome b-c1 complex subunit 6, mitochondrial OS=Homo sapiens GN=UQCRH PE=1 SV=2 - [QCR6_HUMAN]	67.03	2	5	5	16	4.65445e+06	1.83232e+07	17.3819	38.46	4	8	24.6754	67.03	4	8	91	10.7319	4.43701
K7ER96	Thioredoxin-like protein 1 (Fragment) OS=Homo sapiens GN=TXNL1 PE=1 SV=1 - [K7ER96_HUMAN]	42.7	4	7	7	16	2.30803e+06	9.06832e+06	5.74551	34.88	6	8	12.0272	35.94	6	8	281	31.4453	4.83057
P53007	Tricarboxylate transport protein, mitochondrial OS=Homo sapiens GN=SLC25A1 PE=1 SV=2 - [TXTP_HUMAN]	32.48	2	8	8	16	9.23852e+06	1.15449e+07	19.4903	20.9	6	8	18.3626	25.4	6	8	311	33.991	9.89111
P63092	Guanine nucleotide-binding protein G(s) subunit alpha isoforms short OS=Homo sapiens GN=GNAS PE=1 SV=1 - [GNAS2_HUMAN]	26.65	13	7	8	16	9.23127e+06	2.94132e+07	15.7559	17.26	6	8	16.0034	20.3	6	8	394	45.6359	5.8208
Q9BWM7	Sideroflexin-3 OS=Homo sapiens GN=SFXN3 PE=1 SV=3 - [SFXN3_HUMAN]	25.55	3	4	6	16	7.23499e+06	1.49315e+07	19.5994	17.13	4	8	19.8605	21.18	5	8	321	35.4805	9.1001
Q9UBI6	Guanine nucleotide-binding protein G(I)/G(S)/G(O) subunit gamma-12 OS=Homo sapiens GN=GNG12 PE=1 SV=3 - [GBG12_HUMAN]	70.83	1	6	6	15	4.76091e+06	1.18708e+07	17.4119	70.83	5	7	23.1505	70.83	6	8	72	8.00117	8.96826
P28332	Alcohol dehydrogenase 6 OS=Homo sapiens GN=ADH6 PE=1 SV=2 - [ADH6_HUMAN]	38.32	6	9	9	15	6.24529e+06	9.13488e+06	15.9124	20.65	6	7	20.7564	30.43	6	8	368	39.0631	7.76709
Q13596	Sorting nexin-1 OS=Homo sapiens GN=SNX1 PE=1 SV=3 - [SNX1_HUMAN]	18.39	3	6	8	15	5.05977e+06	8.42689e+06	12.9883	11.11	5	7	20.5038	16.48	7	8	522	59.0331	5.14795
P62328	Thymosin beta-4 OS=Homo sapiens GN=TMSB4X PE=1 SV=2 - [TYB4_HUMAN]	56.82	1	4	5	14	9.68842e+06	1.702e+07	20.0311	56.82	4	6	26.4098	56.82	5	8	44	5.04952	5.05908
P25398	40S ribosomal protein S12 OS=Homo sapiens GN=RPS12 PE=1 SV=3 - [RS12_HUMAN]	53.03	1	7	7	14	5.93298e+06	1.52625e+07	16.4959	35.61	5	6	26.4801	53.03	6	8	132	14.5055	7.21045
Q02878	60S ribosomal protein L6 OS=Homo sapiens GN=RPL6 PE=1 SV=3 - [RL6_HUMAN]	34.38	7	10	10	14	5.04786e+06	4.49618e+06	10.4524	22.22	6	6	16.5527	26.39	7	8	288	32.7076	10.5796
O15400	Syntaxin-7 OS=Homo sapiens GN=STX7 PE=1 SV=4 - [STX7_HUMAN]	33.33	1	6	6	14	5.76525e+06	1.39493e+07	11.8711	18.01	4	6	21.6906	33.33	6	8	261	29.7973	5.5542
Q00577	Transcriptional activator protein Pur-alpha OS=Homo sapiens GN=PURA PE=1 SV=2 - [PURA_HUMAN]	25.16	1	7	7	14	3.75654e+06	2.52324e+07	7.60516	13.98	4	6	17.3032	25.16	7	8	322	34.8894	6.44287
O14880	Microsomal glutathione S-transferase 3 OS=Homo sapiens GN=MGST3 PE=1 SV=1 - [MGST3_HUMAN]	50.66	3	6	6	13	1.98064e+07	6.66916e+07	14.5746	34.21	4	5	20.586	42.11	5	8	152	16.5056	9.37842
F8VV32	Lysozyme C OS=Homo sapiens GN=LYZ PE=1 SV=1 - [F8VV32_HUMAN]	46.15	3	6	6	13	4.41922e+06	1.74533e+07	7.73667	38.46	4	5	16.9256	46.15	6	8	104	11.4807	9.0708
A0A087X2I2	Glutathione peroxidase OS=Homo sapiens GN=GPX4 PE=1 SV=1 - [A0A087X2I2_HUMAN]	36.73	9	6	6	13	3.21545e+06	1.43884e+07	8.99184	27.04	4	5	21.2896	36.73	6	8	196	22.01	8.36768
Q96FV2	Secernin-2 OS=Homo sapiens GN=SCRN2 PE=1 SV=3 - [SCRN2_HUMAN]	26.35	7	7	7	13	6.9587e+06	1.7533e+07	10.8973	16.94	5	5	22.3319	24.94	6	8	425	46.5672	5.66846
P31153	S-adenosylmethionine synthase isoform type-2 OS=Homo sapiens GN=MAT2A PE=1 SV=1 - [METK2_HUMAN]	25.06	1	7	7	13	4.99264e+06	1.28863e+07	8.84673	13.67	4	5	20.947	25.06	7	8	395	43.6333	6.48096
Q07960	Rho GTPase-activating protein 1 OS=Homo sapiens GN=ARHGAP1 PE=1 SV=1 - [RHG01_HUMAN]	22.78	3	8	8	13	1.90992e+06	8.06647e+06	7.83725	13.9	5	5	15.4757	22.78	8	8	439	50.4042	6.29053
Q13409	Cytoplasmic dynein 1 intermediate chain 2 OS=Homo sapiens GN=DYNC1I2 PE=1 SV=3 - [DC1I2_HUMAN]	22.41	12	9	9	13	1.43634e+06	7.03653e+06	3.56368	10.19	5	5	19.254	19.28	6	8	638	71.4121	5.19873
Q9HAV0	Guanine nucleotide-binding protein subunit beta-4 OS=Homo sapiens GN=GNB4 PE=1 SV=3 - [GBB4_HUMAN]	20.29	3	2	5	13	1.13506e+07	2.65623e+07	11.8619	9.71	3	5	17.8617	20.29	5	8	340	37.543	5.99854
B4DDD6	Drebrin-like protein OS=Homo sapiens GN=DBNL PE=1 SV=1 - [B4DDD6_HUMAN]	19.21	8	1	6	13	2.77051e+06	7.62837e+06	4.96571	15.27	5	5	14.1314	16.01	5	8	406	45.7184	4.95752
Q16531	DNA damage-binding protein 1 OS=Homo sapiens GN=DDB1 PE=1 SV=1 - [DDB1_HUMAN]	15	5	10	10	13	1.0914e+06	3.46093e+06	4.58282	7.54	5	5	16.5675	12.28	8	8	1140	126.887	5.26221
C9J0J7	Profilin OS=Homo sapiens GN=PFN2 PE=1 SV=1 - [C9J0J7_HUMAN]	65.93	4	2	6	12	5.03912e+06	8.89958e+06	7.16942	34.07	3	4	19.7952	57.14	5	8	91	9.83408	9.17334
P31949	Protein S100-A11 OS=Homo sapiens GN=S100A11 PE=1 SV=2 - [S10AB_HUMAN]	52.38	1	5	5	12	6.38134e+06	2.96236e+07	8.53656	27.62	3	4	21.0232	52.38	5	8	105	11.7328	7.12256
P51580	Thiopurine S-methyltransferase OS=Homo sapiens GN=TPMT PE=1 SV=1 - [TPMT_HUMAN]	35.51	1	9	9	12	2.14022e+06	5.4606e+06	2.1495	13.88	4	4	13.6273	27.76	6	8	245	28.1621	6.22705
P56134	ATP synthase subunit f, mitochondrial OS=Homo sapiens GN=ATP5J2 PE=1 SV=3 - [ATPK_HUMAN]	35.11	4	3	3	12	1.22084e+07	2.51613e+07	8.60224	25.53	2	4	19.9744	35.11	3	8	94	10.9107	9.67139
P26583	High mobility group protein B2 OS=Homo sapiens GN=HMGB2 PE=1 SV=2 - [HMGB2_HUMAN]	25.36	2	4	7	12	1.75523e+06	9.33681e+06	6.89518	15.31	3	4	19.4901	20.1	6	8	209	24.0187	7.81104
Q7L5Y1	Mitochondrial enolase superfamily member 1 OS=Homo sapiens GN=ENOSF1 PE=1 SV=1 - [ENOF1_HUMAN]	24.6	4	7	7	12	882852	4.88692e+06	4.24708	8.13	3	4	10.2227	24.6	7	8	443	49.7544	6.48096
P61006	Ras-related protein Rab-8A OS=Homo sapiens GN=RAB8A PE=1 SV=1 - [RAB8A_HUMAN]	24.15	36	2	5	12	2.57237e+07	4.20759e+07	9.886	10.63	2	4	19.7177	24.15	5	8	207	23.6532	9.0708
O95834	Echinoderm microtubule-associated protein-like 2 OS=Homo sapiens GN=EML2 PE=1 SV=1 - [EMAL2_HUMAN]	22.5	14	9	9	12	929761	6.87505e+06	8.90395	9.55	4	4	23.0467	21.11	8	8	649	70.6341	6.31592
P35813	Protein phosphatase 1A OS=Homo sapiens GN=PPM1A PE=1 SV=1 - [PPM1A_HUMAN]	21.47	7	6	6	12	1.08682e+06	6.09116e+06	8.91686	10.99	3	4	21.0226	21.47	6	8	382	42.4207	5.36377
Q9NSD9	Phenylalanine--tRNA ligase beta subunit OS=Homo sapiens GN=FARSB PE=1 SV=3 - [SYFB_HUMAN]	20.54	1	9	9	12	1.68882e+06	5.70823e+06	6.84528	8.83	4	4	17.7622	18.68	8	8	589	66.0735	6.84424
H0YNE9	Ras-related protein Rab-8B (Fragment) OS=Homo sapiens GN=RAB8B PE=1 SV=1 - [H0YNE9_HUMAN]	19.15	37	1	4	12	2.57237e+07	4.20759e+07	9.886	11.7	2	4	20.3429	19.15	4	8	188	21.8541	8.48486
P04844	Dolichyl-diphosphooligosaccharide--protein glycosyltransferase subunit 2 OS=Homo sapiens GN=RPN2 PE=1 SV=3 - [RPN2_HUMAN]	17.75	4	6	6	12	584900	9.03533e+06	5.67269	11.41	3	4	22.2103	17.75	6	8	631	69.241	5.69385
Q96QK1	Vacuolar protein sorting-associated protein 35 OS=Homo sapiens GN=VPS35 PE=1 SV=2 - [VPS35_HUMAN]	12.44	1	7	7	12	2.40064e+06	1.02661e+07	9.45435	7.04	4	4	17.1591	10.68	6	8	796	91.6489	5.49072
Q99613	Eukaryotic translation initiation factor 3 subunit C OS=Homo sapiens GN=EIF3C PE=1 SV=1 - [EIF3C_HUMAN]	9.2	3	8	8	12	1.25804e+06	5.04056e+06	6.47918	5.15	4	4	13.368	9.2	8	8	913	105.278	5.68115
A0A087X2D0	Serine/arginine-rich-splicing factor 3 OS=Homo sapiens GN=SRSF3 PE=1 SV=1 - [A0A087X2D0_HUMAN]	57.89	2	4	5	11	4.98162e+06	2.75743e+07	5.98559	48.42	3	3	17.3344	57.89	5	8	95	10.314	5.13525
P35754	Glutaredoxin-1 OS=Homo sapiens GN=GLRX PE=1 SV=2 - [GLRX1_HUMAN]	52.83	1	6	6	11	1.40112e+07	2.5352e+07	8.3926	42.45	3	3	19.4008	52.83	5	8	106	11.7682	8.08936
Q15404	Ras suppressor protein 1 OS=Homo sapiens GN=RSU1 PE=1 SV=3 - [RSU1_HUMAN]	45.49	1	8	8	11	2.0422e+06	3.76312e+06	2.28526	12.27	3	3	21.9257	38.99	7	8	277	31.5207	8.646
P20618	Proteasome subunit beta type-1 OS=Homo sapiens GN=PSMB1 PE=1 SV=2 - [PSB1_HUMAN]	44.81	1	7	7	11	3.56702e+06	1.20843e+07	7.68586	19.92	3	3	17.7991	44.81	7	8	241	26.4724	8.1333
Q96CX2	BTB/POZ domain-containing protein KCTD12 OS=Homo sapiens GN=KCTD12 PE=1 SV=1 - [KCD12_HUMAN]	27.38	2	8	8	11	713070	4.83643e+06	0	9.54	3	3	14.4857	25.23	6	8	325	35.6787	5.64307
Q00765	Receptor expression-enhancing protein 5 OS=Homo sapiens GN=REEP5 PE=1 SV=3 - [REEP5_HUMAN]	21.69	5	7	7	11	532730	8.4039e+06	5.24651	10.58	2	3	18.668	20.63	6	8	189	21.479	8.104
O14975	Very long-chain acyl-CoA synthetase OS=Homo sapiens GN=SLC27A2 PE=1 SV=2 - [S27A2_HUMAN]	19.19	2	9	9	11	2.78871e+06	6.69857e+06	7.62865	5.32	3	3	11.5432	17.74	8	8	620	70.2673	8.51416
O60488	Long-chain-fatty-acid--CoA ligase 4 OS=Homo sapiens GN=ACSL4 PE=1 SV=2 - [ACSL4_HUMAN]	18.85	7	9	9	11	1.01073e+06	3.61784e+06	6.9527	4.92	3	3	15.6454	17.3	8	8	711	79.1367	8.38232
O75131	Copine-3 OS=Homo sapiens GN=CPNE3 PE=1 SV=1 - [CPNE3_HUMAN]	17.5	13	5	6	11	3.04113e+06	6.03521e+06	7.99298	4.66	2	3	14.0676	17.5	6	8	537	60.0921	5.84619
Q14974	Importin subunit beta-1 OS=Homo sapiens GN=KPNB1 PE=1 SV=2 - [IMB1_HUMAN]	12.56	4	7	7	11	1.04641e+06	2.40857e+06	4.68172	4.11	3	3	14.2138	9.82	5	8	876	97.108	4.77979
C9J712	Profilin OS=Homo sapiens GN=PFN2 PE=1 SV=1 - [C9J712_HUMAN]	56.04	4	1	5	10	1.09286e+07	8.89958e+06	5.24852	15.38	1	2	19.6667	56.04	5	8	91	9.79195	9.36377
Q9BT78	COP9 signalosome complex subunit 4 OS=Homo sapiens GN=COPS4 PE=1 SV=1 - [CSN4_HUMAN]	28.33	4	7	7	10	1.4707e+06	3.90588e+06	4.68517	7.39	2	2	16.9923	28.33	7	8	406	46.2397	5.8335
Q9NR45	Sialic acid synthase OS=Homo sapiens GN=NANS PE=1 SV=2 - [SIAS_HUMAN]	27.02	3	6	6	10	1.47123e+06	8.9187e+06	4.75127	8.91	2	2	18.8155	27.02	6	8	359	40.2815	6.7417
G5E9G0	60S ribosomal protein L3 OS=Homo sapiens GN=RPL3 PE=1 SV=1 - [G5E9G0_HUMAN]	21.37	6	5	7	10	1.7663e+06	6.24501e+06	2.18449	5.41	2	2	16.6337	21.37	7	8	351	40.2416	10.0083
Q6NUK1	Calcium-binding mitochondrial carrier protein SCaMC-1 OS=Homo sapiens GN=SLC25A24 PE=1 SV=2 - [SCMC1_HUMAN]	14.88	1	7	7	10	559870	8.38076e+06	3.55561	4.19	2	2	15.4916	14.88	7	8	477	53.3203	6.32861
Q8WX93	Palladin OS=Homo sapiens GN=PALLD PE=1 SV=3 - [PALLD_HUMAN]	8.53	6	9	9	10	1.10312e+06	4.28143e+06	4.00633	1.59	2	2	14.0493	7.88	8	8	1383	150.47	7.09326
E9PHK0	Tetranectin OS=Homo sapiens GN=CLEC3B PE=1 SV=1 - [E9PHK0_HUMAN]	60.62	2	7	7	9	2.52774e+06	7.35713e+06	2.615	7.5	1	1	16.2992	60.62	7	8	160	17.7827	5.04639
P22061	Protein-L-isoaspartate(D-aspartate) O-methyltransferase OS=Homo sapiens GN=PCMT1 PE=1 SV=4 - [PIMT_HUMAN]	47.58	5	6	6	9	3.13417e+06	1.33451e+07	1.66917	3.96	1	1	20.6156	47.58	6	8	227	24.6206	7.21045
P16422	Epithelial cell adhesion molecule OS=Homo sapiens GN=EPCAM PE=1 SV=2 - [EPCAM_HUMAN]	22.29	3	5	5	9	0	1.32291e+07	1.66284	3.5	1	1	15.3177	22.29	5	8	314	34.9097	7.45947
F8WAH1	Alpha-aminoadipic semialdehyde synthase, mitochondrial OS=Homo sapiens GN=AASS PE=1 SV=1 - [F8WAH1_HUMAN]	20.9	3	9	9	9	931262	4.77501e+06	2.74108	2.05	1	1	14.4145	18.85	8	8	732	80.9864	6.68311
P00748	Coagulation factor XII OS=Homo sapiens GN=F12 PE=1 SV=3 - [FA12_HUMAN]	16.42	1	7	7	9	1.82536e+06	5.28732e+06	0	3.25	1	1	17.7224	16.42	7	8	615	67.7479	7.73779
P23229	Integrin alpha-6 OS=Homo sapiens GN=ITGA6 PE=1 SV=5 - [ITA6_HUMAN]	11.95	3	8	8	9	1.57737e+06	3.46125e+06	0	1.24	1	1	9.6941	11.95	8	8	1130	126.526	6.60986
P09758	Tumor-associated calcium signal transducer 2 OS=Homo sapiens GN=TACSTD2 PE=1 SV=3 - [TACD2_HUMAN]	21.67	1	4	4	8	0	6.21783e+06		0			14.5383	21.67	4	8	323	35.6866	8.86572
P54802	Alpha-N-acetylglucosaminidase OS=Homo sapiens GN=NAGLU PE=1 SV=2 - [ANAG_HUMAN]	15.07	2	7	7	8	0	1.68233e+06		0			14.5382	15.07	7	8	743	82.2136	6.65381
E7ER77	Endoplasmic reticulum metallopeptidase 1 OS=Homo sapiens GN=ERMP1 PE=1 SV=1 - [E7ER77_HUMAN]	13.32	3	8	8	8	0	2.23846e+06		0			20.4521	13.32	8	8	841	93.1002	8.08936
Q86WU2	Probable D-lactate dehydrogenase, mitochondrial OS=Homo sapiens GN=LDHD PE=1 SV=1 - [LDHD_HUMAN]	32.74	1	10	10	21	7.65146e+06	7.43385e+06	31.4291	22.68	8	14	19.1388	24.06	7	7	507	54.8357	6.65381
E5RHW4	Erlin-2 (Fragment) OS=Homo sapiens GN=ERLIN2 PE=1 SV=1 - [E5RHW4_HUMAN]	30.77	5	9	9	18	4.95496e+06	1.04729e+07	20.6888	27.22	8	11	16.4153	16.57	5	7	338	37.7014	5.61768
P48444	Coatomer subunit delta OS=Homo sapiens GN=ARCN1 PE=1 SV=1 - [COPD_HUMAN]	27.4	4	11	11	17	2.55611e+06	3.51842e+06	14.8923	16.63	8	10	13.8499	20.35	7	7	511	57.1741	6.21436
P62195	26S protease regulatory subunit 8 OS=Homo sapiens GN=PSMC5 PE=1 SV=1 - [PRS8_HUMAN]	31.28	10	8	9	16	3.26626e+06	4.60974e+06	11.8794	23.89	7	9	11.6624	17.49	5	7	406	45.5971	7.54736
C9JPM4	ADP-ribosylation factor 4 (Fragment) OS=Homo sapiens GN=ARF4 PE=1 SV=1 - [C9JPM4_HUMAN]	38.58	7	2	5	14	5.4977e+06	1.44913e+07	16.2585	38.58	4	7	18.5491	38.58	5	7	127	14.5438	8.11865
H3BSJ5	Ubiquinone biosynthesis protein COQ9, mitochondrial OS=Homo sapiens GN=COQ9 PE=1 SV=1 - [H3BSJ5_HUMAN]	36.75	8	6	6	14	5.02297e+06	9.4275e+06	10.1256	30.39	5	7	15.4421	34.28	5	7	283	31.2123	5.46533
Q96JY6	PDZ and LIM domain protein 2 OS=Homo sapiens GN=PDLIM2 PE=1 SV=1 - [PDLI2_HUMAN]	32.39	13	8	8	14	3.85181e+06	5.28736e+06	12.444	24.15	6	7	16.6856	29.26	7	7	352	37.4357	8.71924
B8ZZQ6	Prothymosin alpha OS=Homo sapiens GN=PTMA PE=1 SV=1 - [B8ZZQ6_HUMAN]	26.17	5	6	6	14	2.38339e+06	9.84819e+06	13.6469	25.23	5	7	8.60222	25.23	5	7	107	11.7518	3.81494
P35606	Coatomer subunit beta' OS=Homo sapiens GN=COPB2 PE=1 SV=2 - [COPB2_HUMAN]	17.99	4	11	11	14	1.87456e+06	4.49957e+06	13.4992	11.26	7	7	8.2902	13.25	7	7	906	102.422	5.2749
O00515	Ladinin-1 OS=Homo sapiens GN=LAD1 PE=1 SV=2 - [LAD1_HUMAN]	17.02	5	6	6	14	2.27932e+06	1.92271e+06	11.4824	17.02	6	7	12.7006	13.73	5	7	517	57.0968	9.67139
P14927	Cytochrome b-c1 complex subunit 7 OS=Homo sapiens GN=UQCRB PE=1 SV=2 - [QCR7_HUMAN]	51.35	3	6	6	13	4.35888e+06	2.53953e+07	16.7569	51.35	6	6	20.1963	47.75	5	7	111	13.522	8.77783
O75348	V-type proton ATPase subunit G 1 OS=Homo sapiens GN=ATP6V1G1 PE=1 SV=3 - [VATG1_HUMAN]	50.85	1	4	4	13	1.06772e+07	1.95571e+07	16.4589	28.81	3	6	20.6859	50.85	4	7	118	13.7491	8.79248
P15153	Ras-related C3 botulinum toxin substrate 2 OS=Homo sapiens GN=RAC2 PE=1 SV=1 - [RAC2_HUMAN]	29.17	10	1	5	13	1.04283e+07	2.72722e+07	12.8158	15.1	3	6	15.4448	29.17	5	7	192	21.4151	7.60596
H9KV48	Plasma protease C1 inhibitor OS=Homo sapiens GN=SERPING1 PE=1 SV=1 - [H9KV48_HUMAN]	17.93	4	7	7	13	4.65796e+06	1.38085e+07	6.26841	15.12	6	6	19.7812	17.93	6	7	463	50.9571	6.3667
O60763	General vesicular transport factor p115 OS=Homo sapiens GN=USO1 PE=1 SV=2 - [USO1_HUMAN]	15.9	1	10	10	13	1.99574e+06	4.42805e+06	9.78866	8	6	6	9.55334	12.27	7	7	962	107.828	4.90674
J3KTA4	Probable ATP-dependent RNA helicase DDX5 OS=Homo sapiens GN=DDX5 PE=1 SV=1 - [J3KTA4_HUMAN]	14.98	6	3	9	13	2.17901e+06	4.13613e+06	9.0104	9.77	6	6	15.8449	12.21	7	7	614	69.0438	8.85107
S4R460	Immunoglobulin heavy variable 3/OR16-9 (non-functional) OS=Homo sapiens GN=IGHV3OR16-9 PE=1 SV=2 - [S4R460_HUMAN]	31.25	7	1	2	12	5.84991e+06	1.96871e+07	5.23201	31.25	2	5	21.385	31.25	2	7	96	10.423	7.97217
O75955	Flotillin-1 OS=Homo sapiens GN=FLOT1 PE=1 SV=3 - [FLOT1_HUMAN]	18.74	13	7	7	12	709292	4.08475e+06	6.03852	12.18	4	5	16.1435	12.65	5	7	427	47.3256	7.48877
P43652	Afamin OS=Homo sapiens GN=AFM PE=1 SV=1 - [AFAM_HUMAN]	18.2	1	8	8	12	1.92734e+06	4.56963e+06	4.55635	10.52	5	5	16.1255	15.53	7	7	599	69.024	5.89697
Q9H845	Acyl-CoA dehydrogenase family member 9, mitochondrial OS=Homo sapiens GN=ACAD9 PE=1 SV=1 - [ACAD9_HUMAN]	17.87	3	8	8	12	2.31821e+06	8.05955e+06	3.45386	7.41	4	5	16.7667	15.78	7	7	621	68.7167	7.95752
Q6JQN1	Acyl-CoA dehydrogenase family member 10 OS=Homo sapiens GN=ACAD10 PE=1 SV=1 - [ACD10_HUMAN]	13.5	5	9	9	12	469476	4.30286e+06	8.39817	5.38	4	5	16.0535	10.48	7	7	1059	118.758	8.06006
Q13492	Phosphatidylinositol-binding clathrin assembly protein OS=Homo sapiens GN=PICALM PE=1 SV=2 - [PICAL_HUMAN]	11.96	15	4	6	12	1.71027e+06	5.29036e+06	12.1748	10.12	5	5	17.8959	10.28	5	7	652	70.71	7.89893
P14923	Junction plakoglobin OS=Homo sapiens GN=JUP PE=1 SV=3 - [PLAK_HUMAN]	11.41	5	4	6	12	782316	1.58497e+06	10.0112	9.26	5	5	15.7027	11.41	6	7	745	81.6927	6.13818
O15145	Actin-related protein 2/3 complex subunit 3 OS=Homo sapiens GN=ARPC3 PE=1 SV=3 - [ARPC3_HUMAN]	53.37	3	7	7	11	2.66474e+06	1.0598e+07	6.14475	19.66	3	4	17.9582	46.07	6	7	178	20.5334	8.5874
O43678	NADH dehydrogenase [ubiquinone] 1 alpha subcomplex subunit 2 OS=Homo sapiens GN=NDUFA2 PE=1 SV=3 - [NDUA2_HUMAN]	50.51	1	5	5	11	2.90321e+06	1.82734e+07	6.81332	28.28	3	4	19.2659	42.42	4	7	99	10.9148	9.56885
P62979	Ubiquitin-40S ribosomal protein S27a OS=Homo sapiens GN=RPS27A PE=1 SV=2 - [RS27A_HUMAN]	43.59	22	6	6	11	4.42326e+06	8.9877e+06	7.32806	36.54	4	4	14.0896	37.82	5	7	156	17.9535	9.64209
P42025	Beta-centractin OS=Homo sapiens GN=ACTR1B PE=1 SV=1 - [ACTY_HUMAN]	28.72	1	1	6	11	3.95554e+06	1.49592e+07	8.22203	15.69	4	4	18.3173	28.72	6	7	376	42.2667	6.40479
Q9UNH7	Sorting nexin-6 OS=Homo sapiens GN=SNX6 PE=1 SV=1 - [SNX6_HUMAN]	28.08	7	8	9	11	1.73273e+06	2.60426e+06	3.87471	11.58	4	4	12.2188	23.65	7	7	406	46.6198	6.16357
P26373	60S ribosomal protein L13 OS=Homo sapiens GN=RPL13 PE=1 SV=4 - [RL13_HUMAN]	25.12	3	6	6	11	3.39549e+06	6.98311e+06	8.58764	16.11	3	4	15.4284	25.12	6	7	211	24.2465	11.6489
Q9NVD7	Alpha-parvin OS=Homo sapiens GN=PARVA PE=1 SV=1 - [PARVA_HUMAN]	24.19	5	7	7	11	1.02187e+06	8.2612e+06	6.30297	11.02	4	4	14.7398	24.19	6	7	372	42.2174	5.94775
P30533	Alpha-2-macroglobulin receptor-associated protein OS=Homo sapiens GN=LRPAP1 PE=1 SV=1 - [AMRP_HUMAN]	22.69	1	7	7	11	2.50656e+06	6.8551e+06	5.72669	16.53	4	4	18.0891	22.69	7	7	357	41.4409	8.77783
P53004	Biliverdin reductase A OS=Homo sapiens GN=BLVRA PE=1 SV=2 - [BIEA_HUMAN]	21.96	2	5	5	11	2.89916e+06	8.01922e+06	11.0586	12.5	3	4	17.0419	21.96	5	7	296	33.4073	6.44287
Q9NQW7	Xaa-Pro aminopeptidase 1 OS=Homo sapiens GN=XPNPEP1 PE=1 SV=3 - [XPP1_HUMAN]	20.87	4	8	8	11	2.17695e+06	5.28006e+06	5.65231	8.03	4	4	10.9983	18.3	7	7	623	69.8732	5.66846
Q9Y512	Sorting and assembly machinery component 50 homolog OS=Homo sapiens GN=SAMM50 PE=1 SV=3 - [SAM50_HUMAN]	18.76	1	7	7	11	530296	4.8012e+06	5.45882	9.81	3	4	17.5213	14.5	6	7	469	51.9433	6.90283
Q8N1G4	Leucine-rich repeat-containing protein 47 OS=Homo sapiens GN=LRRC47 PE=1 SV=1 - [LRC47_HUMAN]	15.78	1	8	8	11	1.15355e+06	1.95888e+06	3.62237	7.89	4	4	17.7974	14.24	7	7	583	63.4337	8.27979
A6NKZ2	N-acylglucosamine 2-epimerase OS=Homo sapiens GN=RENBP PE=1 SV=2 - [A6NKZ2_HUMAN]	14.53	4	6	6	11	2.61712e+06	1.16763e+07	10.2422	8.96	4	4	19.6471	14.53	6	7	413	47.0351	6.3667
O95168	NADH dehydrogenase [ubiquinone] 1 beta subcomplex subunit 4 OS=Homo sapiens GN=NDUFB4 PE=1 SV=3 - [NDUB4_HUMAN]	41.09	3	4	4	10	5.95113e+06	2.71348e+07	6.77775	21.71	2	3	17.5034	41.09	4	7	129	15.1991	9.84717
F8W7Q4	Protein FAM162A OS=Homo sapiens GN=FAM162A PE=1 SV=1 - [F8W7Q4_HUMAN]	38.19	3	6	6	10	2.85836e+06	9.38525e+06	4.09707	18.75	3	3	19.3123	38.19	6	7	144	16.5047	9.77393
P59998	Actin-related protein 2/3 complex subunit 4 OS=Homo sapiens GN=ARPC4 PE=1 SV=3 - [ARPC4_HUMAN]	33.93	8	5	5	10	2.45303e+06	1.1249e+07	6.87735	11.31	2	3	14.2121	33.93	5	7	168	19.6543	8.42627
P62906	60S ribosomal protein L10a OS=Homo sapiens GN=RPL10A PE=1 SV=2 - [RL10A_HUMAN]	32.26	1	6	6	10	1.78645e+06	9.73247e+06	7.24272	17.05	3	3	14.6304	32.26	6	7	217	24.8155	9.93506
P61313	60S ribosomal protein L15 OS=Homo sapiens GN=RPL15 PE=1 SV=2 - [RL15_HUMAN]	25.98	5	5	5	10	3.84885e+06	8.2401e+06	3.66845	11.27	3	3	14.1115	25.98	5	7	204	24.1311	11.6196
Q8N335	Glycerol-3-phosphate dehydrogenase 1-like protein OS=Homo sapiens GN=GPD1L PE=1 SV=1 - [GPD1L_HUMAN]	22.22	4	6	6	10	3.4147e+06	8.65268e+06	7.15648	9.97	3	3	12.2681	22.22	6	7	351	38.3939	7.02002
O15144	Actin-related protein 2/3 complex subunit 2 OS=Homo sapiens GN=ARPC2 PE=1 SV=1 - [ARPC2_HUMAN]	20	5	6	6	10	2.95055e+06	7.52856e+06	7.25427	10.67	3	3	16.993	20	6	7	300	34.3115	7.35693
P23142	Fibulin-1 OS=Homo sapiens GN=FBLN1 PE=1 SV=4 - [FBLN1_HUMAN]	12.52	6	2	5	10	1.00903e+06	5.08827e+06	2.08719	5.26	3	3	10.9494	12.52	5	7	703	77.1624	5.22412
P29972	Aquaporin-1 OS=Homo sapiens GN=AQP1 PE=1 SV=3 - [AQP1_HUMAN]	10.41	2	3	3	10	1.1946e+07	6.07094e+07	6.93675	9.67	2	3	21.2575	10.41	3	7	269	28.5081	7.41553
Q92896	Golgi apparatus protein 1 OS=Homo sapiens GN=GLG1 PE=1 SV=2 - [GSLG1_HUMAN]	9.08	2	8	8	10	428218	3.39932e+06	1.76626	2.54	3	3	15.045	8.31	7	7	1179	134.464	6.90283
P62888	60S ribosomal protein L30 OS=Homo sapiens GN=RPL30 PE=1 SV=2 - [RL30_HUMAN]	59.13	5	5	5	9	5.43394e+06	1.06936e+07	5.72888	24.35	2	2	17.5715	59.13	5	7	115	12.7757	9.62744
Q9NRX4	14 kDa phosphohistidine phosphatase OS=Homo sapiens GN=PHPT1 PE=1 SV=1 - [PHP14_HUMAN]	52.8	1	4	4	9	4.22561e+06	1.0644e+07	5.79119	9.6	1	2	19.2614	52.8	4	7	125	13.8237	6.07471
Q86Y39	NADH dehydrogenase [ubiquinone] 1 alpha subcomplex subunit 11 OS=Homo sapiens GN=NDUFA11 PE=1 SV=3 - [NDUAB_HUMAN]	49.65	5	6	6	9	2.04401e+06	8.42715e+06	7.76089	26.95	2	2	16.6501	49.65	6	7	141	14.8425	8.71924
Q9UI09	NADH dehydrogenase [ubiquinone] 1 alpha subcomplex subunit 12 OS=Homo sapiens GN=NDUFA12 PE=1 SV=1 - [NDUAC_HUMAN]	36.55	4	4	4	9	4.06444e+06	5.42403e+06	4.71454	15.86	2	2	12.6754	36.55	4	7	145	17.1036	9.62744
E9PJK1	Tetraspanin OS=Homo sapiens GN=CD81 PE=1 SV=1 - [E9PJK1_HUMAN]	35.76	9	3	3	9	3.95271e+06	4.46508e+07	4.80162	21.82	2	2	21.0762	35.76	3	7	165	17.9509	4.99561
Q9P0L0	Vesicle-associated membrane protein-associated protein A OS=Homo sapiens GN=VAPA PE=1 SV=3 - [VAPA_HUMAN]	32.93	2	5	5	9	2.52961e+06	4.23026e+06	5.52207	13.25	2	2	14.7903	32.93	5	7	249	27.8752	8.6167
P53999	Activated RNA polymerase II transcriptional coactivator p15 OS=Homo sapiens GN=SUB1 PE=1 SV=3 - [TCP4_HUMAN]	30.71	1	5	5	9	3.34587e+06	1.78088e+07	2.34544	18.9	2	2	17.0794	30.71	5	7	127	14.3864	9.59814
Q15493	Regucalcin OS=Homo sapiens GN=RGN PE=1 SV=1 - [RGN_HUMAN]	29.1	1	6	6	9	3.42932e+06	3.23054e+06	4.80946	7.36	2	2	4.60847	25.75	5	7	299	33.2314	6.25244
P13693	Translationally-controlled tumor protein OS=Homo sapiens GN=TPT1 PE=1 SV=1 - [TCTP_HUMAN]	20.93	7	4	4	9	3.27393e+06	9.38509e+06	0	15.7	2	2	16.6357	20.93	4	7	172	19.5826	4.93213
Q07065	Cytoskeleton-associated protein 4 OS=Homo sapiens GN=CKAP4 PE=1 SV=2 - [CKAP4_HUMAN]	15.12	1	6	6	9	1.91478e+06	5.63159e+06	4.97664	4.98	2	2	16.4909	15.12	6	7	602	65.9827	5.92236
Q9Y5K6	CD2-associated protein OS=Homo sapiens GN=CD2AP PE=1 SV=1 - [CD2AP_HUMAN]	13.93	1	6	6	9	1.37637e+06	3.58081e+06	3.94864	1.56	1	2	13.0579	13.93	6	7	639	71.4073	6.40479
G8JLD5	Dynamin-1-like protein OS=Homo sapiens GN=DNM1L PE=1 SV=1 - [G8JLD5_HUMAN]	12.36	7	6	6	9	1.00075e+06	2.30574e+06	3.95302	3.51	2	2	13.569	12.36	6	7	712	79.572	7.07861
Q07954	Prolow-density lipoprotein receptor-related protein 1 OS=Homo sapiens GN=LRP1 PE=1 SV=2 - [LRP1_HUMAN]	2.02	3	7	7	9	459558	1.32008e+06	1.75676	0.62	2	2	5.39078	1.61	6	7	4544	504.276	5.38916
Q6IAA8	Ragulator complex protein LAMTOR1 OS=Homo sapiens GN=LAMTOR1 PE=1 SV=2 - [LTOR1_HUMAN]	60.25	5	6	6	8	2.28919e+06	1.12549e+07	1.99738	8.07	1	1	16.5719	60.25	6	7	161	17.7338	5.14795
E9PHN7	Glutathione S-transferase Mu 2 OS=Homo sapiens GN=GSTM2 PE=1 SV=2 - [E9PHN7_HUMAN]	31.49	7	3	6	8	1.14257e+07	1.06399e+07	2.3558	4.97	1	1	11.969	31.49	6	7	181	21.3488	8.32373
Q13177	Serine/threonine-protein kinase PAK 2 OS=Homo sapiens GN=PAK2 PE=1 SV=3 - [PAK2_HUMAN]	26.72	8	4	7	8	2.44034e+06	6.04597e+06	1.98423	1.72	1	1	15.4347	26.72	7	7	524	58.0059	5.96045
J3QLD9	Flotillin-2 OS=Homo sapiens GN=FLOT2 PE=1 SV=1 - [J3QLD9_HUMAN]	21.03	4	6	6	8	1.1727e+06	4.47976e+06	1.85986	2.57	1	1	18.9558	21.03	6	7	428	47.1127	5.31299
Q13148	TAR DNA-binding protein 43 OS=Homo sapiens GN=TARDBP PE=1 SV=1 - [TADBP_HUMAN]	20.05	19	6	6	8	2.61543e+06	2.85391e+06	0	4.35	1	1	12.69	20.05	6	7	414	44.7113	6.18896
Q96AE4	Far upstream element-binding protein 1 OS=Homo sapiens GN=FUBP1 PE=1 SV=3 - [FUBP1_HUMAN]	13.35	3	6	7	8	402446	5.52238e+06	0	2.33	1	1	10.2762	13.35	7	7	644	67.5185	7.60596
A0A0J9YVZ3	Maltase-glucoamylase, intestinal (Fragment) OS=Homo sapiens GN=MGAM PE=1 SV=1 - [A0A0J9YVZ3_HUMAN]	10.74	5	7	7	8	87524.3	1.48536e+06	2.41275	1.79	1	1	12.9557	10.74	7	7	2012	228.926	5.26221
P62277	40S ribosomal protein S13 OS=Homo sapiens GN=RPS13 PE=1 SV=2 - [RS13_HUMAN]	34.44	3	6	6	7	0	3.95561e+06		0			11.1374	34.44	6	7	151	17.2117	10.5356
Q6NZI2	Polymerase I and transcript release factor OS=Homo sapiens GN=PTRF PE=1 SV=1 - [PTRF_HUMAN]	25.38	1	6	6	7	0	8.63618e+06		0			17.3852	25.38	6	7	390	43.4498	5.60498
P34059	N-acetylgalactosamine-6-sulfatase OS=Homo sapiens GN=GALNS PE=1 SV=1 - [GALNS_HUMAN]	23.56	2	6	6	7	0	5.87102e+06		0			11.9538	23.56	6	7	522	57.9891	6.7417
P04003	C4b-binding protein alpha chain OS=Homo sapiens GN=C4BPA PE=1 SV=2 - [C4BPA_HUMAN]	17.76	2	7	7	7	0	8.93817e+06		0			15.7134	17.76	7	7	597	66.9894	7.29834
Q7Z6Z7	E3 ubiquitin-protein ligase HUWE1 OS=Homo sapiens GN=HUWE1 PE=1 SV=3 - [HUWE1_HUMAN]	2.51	2	7	7	7	0	1.8416e+06		0			15.4607	2.51	7	7	4374	481.589	5.22412
Q04828	Aldo-keto reductase family 1 member C1 OS=Homo sapiens GN=AKR1C1 PE=1 SV=1 - [AK1C1_HUMAN]	47.99	8	5	10	23	2.32791e+07	1.15846e+07	42.3466	47.99	10	17	8.76388	28.48	5	6	323	36.765	7.88428
P04259	Keratin, type II cytoskeletal 6B OS=Homo sapiens GN=KRT6B PE=1 SV=5 - [K2C6B_HUMAN]	19.15	25	0	12	21	3.52053e+07	2.94485e+07	37.0055	18.79	11	15	11.9782	6.03	4	6	564	60.0303	8.00146
P48668	Keratin, type II cytoskeletal 6C OS=Homo sapiens GN=KRT6C PE=1 SV=3 - [K2C6C_HUMAN]	19.15	26	1	12	20	1.96445e+07	2.94485e+07	33.202	18.79	11	14	11.9782	6.03	4	6	564	59.9883	8.00146
B4DGU4	Catenin beta-1 OS=Homo sapiens GN=CTNNB1 PE=1 SV=1 - [B4DGU4_HUMAN]	10.98	2	5	7	14	2.45628e+06	2.92255e+06	12.6486	10.98	7	8	13.4142	7.49	5	6	774	84.7119	5.92236
Q5SRN7	HLA class I histocompatibility antigen, A-3 alpha chain OS=Homo sapiens GN=HLA-A PE=1 SV=2 - [Q5SRN7_HUMAN]	39.46	34	2	8	13	3.97214e+06	2.1816e+07	11.5651	25.75	6	7	12.1496	25.08	5	6	299	34.1897	5.66846
Q8N4T8	Carbonyl reductase family member 4 OS=Homo sapiens GN=CBR4 PE=1 SV=3 - [CBR4_HUMAN]	38.82	5	7	7	13	4.99377e+06	7.40679e+06	13.9066	38.82	7	7	17.7753	32.91	5	6	237	25.2854	9.33447
P60842	Eukaryotic initiation factor 4A-I OS=Homo sapiens GN=EIF4A1 PE=1 SV=1 - [IF4A1_HUMAN]	24.38	20	1	8	13	1.10736e+07	1.61893e+07	12.2582	20.69	6	7	13.9663	16.75	6	6	406	46.1246	5.47803
G3V4I0	Ectonucleoside triphosphate diphosphohydrolase 5 OS=Homo sapiens GN=ENTPD5 PE=1 SV=1 - [G3V4I0_HUMAN]	22.11	4	8	8	13	3.5785e+06	3.33102e+06	9.79472	16.46	6	7	11.6996	16.46	5	6	407	45.3068	6.1001
Q93052	Lipoma-preferred partner OS=Homo sapiens GN=LPP PE=1 SV=1 - [LPP_HUMAN]	20.1	12	8	8	13	3.72052e+06	8.09572e+06	10.7293	16.18	7	7	11.5112	15.52	5	6	612	65.7038	7.37158
P23378	Glycine dehydrogenase (decarboxylating), mitochondrial OS=Homo sapiens GN=GLDC PE=1 SV=2 - [GCSP_HUMAN]	17.06	1	11	11	13	2.31346e+06	2.34178e+06	10.6649	10.39	7	7	9.08847	7.75	5	6	1020	112.657	7.10791
O94979	Protein transport protein Sec31A OS=Homo sapiens GN=SEC31A PE=1 SV=3 - [SC31A_HUMAN]	10.41	14	10	10	13	1.60398e+06	3.17513e+06	7.46032	5.82	6	7	12.2873	6.56	6	6	1220	132.931	6.88818
P61457	Pterin-4-alpha-carbinolamine dehydratase OS=Homo sapiens GN=PCBD1 PE=1 SV=2 - [PHS_HUMAN]	64.42	1	6	6	12	1.02938e+07	1.64167e+07	12.073	57.69	5	6	10.8525	57.69	5	6	104	11.992	6.80029
P30046	D-dopachrome decarboxylase OS=Homo sapiens GN=DDT PE=1 SV=3 - [DOPD_HUMAN]	29.66	5	4	4	12	1.21499e+07	2.94508e+07	12.9641	29.66	4	6	15.6514	29.66	4	6	118	12.7037	7.29834
H0Y2Y8	Zyxin (Fragment) OS=Homo sapiens GN=ZYX PE=1 SV=1 - [H0Y2Y8_HUMAN]	17.96	5	6	6	12	1.17795e+06	4.14237e+06	11.4436	15.93	5	6	9.74864	15.93	5	6	540	57.6063	6.87354
Q9BRA2	Thioredoxin domain-containing protein 17 OS=Homo sapiens GN=TXNDC17 PE=1 SV=1 - [TXD17_HUMAN]	60.98	4	5	5	11	9.09818e+06	1.53756e+07	12.014	38.21	4	5	12.6193	60.98	5	6	123	13.9318	5.51611
F8VQR7	Cysteine and glycine-rich protein 2 OS=Homo sapiens GN=CSRP2 PE=1 SV=1 - [F8VQR7_HUMAN]	49.73	3	7	7	11	4.58981e+06	7.71562e+06	10.4357	33.16	5	5	10.6897	32.62	5	6	187	20.6637	8.41162
Q9UBQ0	Vacuolar protein sorting-associated protein 29 OS=Homo sapiens GN=VPS29 PE=1 SV=1 - [VPS29_HUMAN]	42.86	2	6	6	11	3.97244e+06	1.22806e+07	7.65983	22.53	4	5	18.7416	38.46	5	6	182	20.4927	6.78564
A0A0C4DGS0	NADH dehydrogenase [ubiquinone] 1 alpha subcomplex subunit 6 OS=Homo sapiens GN=NDUFA6 PE=1 SV=1 - [A0A0C4DGS0_HUMAN]	37.5	3	4	4	11	6.22507e+06	1.93912e+07	9.63094	31.25	3	5	17.7449	37.5	4	6	128	15.1269	9.979
P62249	40S ribosomal protein S16 OS=Homo sapiens GN=RPS16 PE=1 SV=2 - [RS16_HUMAN]	33.56	7	5	5	11	3.97775e+06	1.00073e+07	10.9799	25.34	4	5	14.5074	33.56	5	6	146	16.435	10.2134
Q9BSH4	Translational activator of cytochrome c oxidase 1 OS=Homo sapiens GN=TACO1 PE=1 SV=1 - [TACO1_HUMAN]	32.66	1	7	7	11	3.64447e+06	7.31763e+06	8.09776	20.54	5	5	12.4107	25.59	5	6	297	32.4567	8.1333
A6ND91	Putative L-aspartate dehydrogenase OS=Homo sapiens GN=ASPDH PE=1 SV=2 - [ASPD_HUMAN]	28.98	3	7	7	11	2.81573e+06	5.24315e+06	10.1982	19.43	5	5	14.5827	25.09	6	6	283	29.9274	7.28369
B4DR80	Serine/threonine-protein kinase 24 OS=Homo sapiens GN=STK24 PE=1 SV=1 - [B4DR80_HUMAN]	25	15	8	8	11	481979	2.90485e+06	3.71049	16.02	5	5	12.7845	19.9	6	6	412	45.8074	5.57959
P48059	LIM and senescent cell antigen-like-containing domain protein 1 OS=Homo sapiens GN=LIMS1 PE=1 SV=4 - [LIMS1_HUMAN]	23.08	5	4	6	11	2.82764e+06	4.75566e+06	5.82662	15.38	4	5	10.0557	20	5	6	325	37.2258	8.04541
H0YL72	Isocitrate dehydrogenase [NAD] subunit alpha, mitochondrial OS=Homo sapiens GN=IDH3A PE=1 SV=1 - [H0YL72_HUMAN]	22.36	8	6	6	11	6.71649e+06	1.47959e+07	13.0493	16.92	4	5	14.6826	19.64	5	6	331	35.763	6.44287
A0A0B4J1V1	Immunoglobulin heavy variable 3-21 OS=Homo sapiens GN=IGHV3-21 PE=1 SV=1 - [HV321_HUMAN]	18.8	10	1	2	11	4.73706e+06	1.42475e+07	7.94486	18.8	2	5	17.5463	18.8	2	6	117	12.8314	8.27979
A0A0D9SFB3	ATP-dependent RNA helicase DDX3X OS=Homo sapiens GN=DDX3X PE=1 SV=1 - [A0A0D9SFB3_HUMAN]	18.44	13	7	8	11	1.71881e+06	1.46871e+06	6.78095	10.16	5	5	8.37419	13.59	6	6	640	70.7961	7.35693
E5RIW3	Tubulin-specific chaperone A OS=Homo sapiens GN=TBCA PE=1 SV=1 - [E5RIW3_HUMAN]	80.95	5	6	6	10	2.98273e+06	7.07598e+06	7.44961	39.29	3	4	16.8429	69.05	5	6	84	10.074	4.62744
P62857	40S ribosomal protein S28 OS=Homo sapiens GN=RPS28 PE=1 SV=1 - [RS28_HUMAN]	52.17	1	4	4	10	3.07431e+06	7.43124e+06	8.77147	46.38	3	4	15.209	52.17	4	6	69	7.8362	10.6968
O43920	NADH dehydrogenase [ubiquinone] iron-sulfur protein 5 OS=Homo sapiens GN=NDUFS5 PE=1 SV=3 - [NDUS5_HUMAN]	41.51	1	4	4	10	5.48817e+06	1.84167e+07	8.42112	29.25	3	4	14.8063	30.19	3	6	106	12.5094	9.14404
E9PGT1	Translin OS=Homo sapiens GN=TSN PE=1 SV=1 - [E9PGT1_HUMAN]	39.91	4	7	7	10	947095	4.01977e+06	7.51306	21.08	4	4	14.8437	30.94	5	6	223	25.5565	6.88818
P20339	Ras-related protein Rab-5A OS=Homo sapiens GN=RAB5A PE=1 SV=2 - [RAB5A_HUMAN]	38.14	8	4	6	10	5.64702e+06	6.34827e+06	7.25452	17.21	3	4	14.0984	32.56	5	6	215	23.6438	8.14795
P28070	Proteasome subunit beta type-4 OS=Homo sapiens GN=PSMB4 PE=1 SV=4 - [PSB4_HUMAN]	34.85	1	5	5	10	3.84041e+06	9.11774e+06	8.46609	19.7	3	4	12.0198	34.85	5	6	264	29.1855	5.97314
P67809	Nuclease-sensitive element-binding protein 1 OS=Homo sapiens GN=YBX1 PE=1 SV=3 - [YBOX1_HUMAN]	33.95	4	4	5	10	2.87928e+06	1.06592e+07	10.832	25	4	4	10.2786	33.95	5	6	324	35.9027	9.87646
P24844	Myosin regulatory light polypeptide 9 OS=Homo sapiens GN=MYL9 PE=1 SV=4 - [MYL9_HUMAN]	33.72	2	1	5	10	1.03141e+07	8.05257e+06	9.36818	17.44	3	4	13.4568	27.33	4	6	172	19.8144	4.91943
Q15435	Protein phosphatase 1 regulatory subunit 7 OS=Homo sapiens GN=PPP1R7 PE=1 SV=1 - [PP1R7_HUMAN]	33.61	8	8	8	10	402875	5.43777e+06	7.86925	13.89	4	4	17.0667	22.78	5	6	360	41.5385	4.90674
P62829	60S ribosomal protein L23 OS=Homo sapiens GN=RPL23 PE=1 SV=1 - [RL23_HUMAN]	32.86	5	4	4	10	2.79735e+06	1.11223e+07	8.48115	25.71	3	4	12.4273	32.86	4	6	140	14.8561	10.5063
Q9NVS9	Pyridoxine-5'-phosphate oxidase OS=Homo sapiens GN=PNPO PE=1 SV=1 - [PNPO_HUMAN]	30.65	2	5	5	10	3.78939e+06	1.59984e+07	8.9152	17.24	3	4	17.9	24.9	4	6	261	29.9688	7.06396
P62913	60S ribosomal protein L11 OS=Homo sapiens GN=RPL11 PE=1 SV=2 - [RL11_HUMAN]	28.65	3	5	5	10	6.96632e+06	8.71012e+06	10.4322	16.85	3	4	17.2716	28.65	4	6	178	20.2396	9.59814
P62263	40S ribosomal protein S14 OS=Homo sapiens GN=RPS14 PE=1 SV=3 - [RS14_HUMAN]	26.49	3	5	5	10	3.79556e+06	1.11931e+07	8.43461	25.83	4	4	18.2316	24.5	4	6	151	16.2625	10.0522
F2Z2Y4	Pyridoxal kinase OS=Homo sapiens GN=PDXK PE=1 SV=1 - [F2Z2Y4_HUMAN]	24.26	2	5	5	10	1.3991e+06	5.79977e+06	7.20758	20.22	4	4	17.2402	24.26	5	6	272	30.6187	6.65381
Q9NX40	OCIA domain-containing protein 1 OS=Homo sapiens GN=OCIAD1 PE=1 SV=1 - [OCAD1_HUMAN]	23.27	14	5	5	10	3.99911e+06	5.81566e+06	5.98995	19.18	4	4	13.6976	19.18	4	6	245	27.6088	7.48877
F5H157	Ras-related protein Rab-35 (Fragment) OS=Homo sapiens GN=RAB35 PE=1 SV=1 - [F5H157_HUMAN]	17.84	30	1	3	10	2.57237e+07	3.9268e+07	9.886	11.89	2	4	14.551	17.84	3	6	185	21.2009	8.30908
I3L1R7	Ethanolamine-phosphate cytidylyltransferase OS=Homo sapiens GN=PCYT2 PE=1 SV=1 - [I3L1R7_HUMAN]	15.53	6	6	6	10	1.55847e+06	4.17542e+06	3.8455	13.35	4	4	6.83194	14.44	5	6	367	41.3698	7.35693
Q9H6S3	Epidermal growth factor receptor kinase substrate 8-like protein 2 OS=Homo sapiens GN=EPS8L2 PE=1 SV=2 - [ES8L2_HUMAN]	13.29	4	6	6	10	2.09962e+06	3.25399e+06	9.41714	6.29	3	4	10.6757	13.29	6	6	715	80.5701	6.84424
P10643	Complement component C7 OS=Homo sapiens GN=C7 PE=1 SV=2 - [CO7_HUMAN]	12.1	1	7	7	10	1.34805e+06	3.82624e+06	1.64429	6.52	4	4	8.2063	9.25	5	6	843	93.4573	6.48096
Q9NZ45	CDGSH iron-sulfur domain-containing protein 1 OS=Homo sapiens GN=CISD1 PE=1 SV=1 - [CISD1_HUMAN]	42.59	1	3	3	9	2.27776e+07	1.80005e+07	10.1458	13.89	1	3	20.8134	42.59	3	6	108	12.1912	9.08545
P24666	Low molecular weight phosphotyrosine protein phosphatase OS=Homo sapiens GN=ACP1 PE=1 SV=3 - [PPAC_HUMAN]	42.41	4	5	5	9	1.71314e+06	7.3838e+06	4.29851	15.19	2	3	13.0314	42.41	5	6	158	18.0308	6.7417
F8VZJ2	Nascent polypeptide-associated complex subunit alpha OS=Homo sapiens GN=NACA PE=1 SV=1 - [F8VZJ2_HUMAN]	40.44	7	3	3	9	2.30902e+06	1.16918e+07	6.19192	20.59	2	3	12.8063	40.44	3	6	136	15.0068	4.90674
P10301	Ras-related protein R-Ras OS=Homo sapiens GN=RRAS PE=1 SV=1 - [RRAS_HUMAN]	38.99	3	4	6	9	1.50439e+06	5.2006e+06	4.88767	17.89	3	3	12.5304	33.49	5	6	218	23.4659	6.93213
P30049	ATP synthase subunit delta, mitochondrial OS=Homo sapiens GN=ATP5D PE=1 SV=2 - [ATPD_HUMAN]	37.5	1	3	3	9	4.9543e+07	6.25884e+07	9.24486	13.69	2	3	19.3257	37.5	3	6	168	17.4792	5.49072
R4GN98	Protein S100 (Fragment) OS=Homo sapiens GN=S100A6 PE=1 SV=1 - [R4GN98_HUMAN]	31.76	2	3	3	9	1.7989e+07	3.46252e+07	6.42651	17.65	2	3	12.7157	31.76	3	6	85	9.67506	5.45264
A0A087WXM6	60S ribosomal protein L17 (Fragment) OS=Homo sapiens GN=RPL17 PE=3 SV=1 - [A0A087WXM6_HUMAN]	30.77	12	4	4	9	2.46287e+06	4.68745e+06	5.93292	13.61	2	3	11.8642	30.77	4	6	169	19.5732	10.0376
Q9NP72	Ras-related protein Rab-18 OS=Homo sapiens GN=RAB18 PE=1 SV=1 - [RAB18_HUMAN]	29.13	4	5	5	9	2.36081e+06	6.10123e+06	5.71953	9.22	2	3	13.1142	29.13	5	6	206	22.9626	5.23682
H7C1U8	MICOS complex subunit (Fragment) OS=Homo sapiens GN=APOO PE=1 SV=1 - [H7C1U8_HUMAN]	28.09	3	4	4	9	4.66496e+06	1.06862e+07	7.17124	14.61	2	3	17.6556	28.09	4	6	178	20.0673	8.6167
A0A0B4J2A0	Uncharacterized protein OS=Homo sapiens PE=1 SV=1 - [A0A0B4J2A0_HUMAN]	25.52	2	8	8	9	1.3178e+06	6.06076e+06	7.48322	8.16	3	3	11.7378	20.5	6	6	478	51.4721	6.82959
D6RHI9	Ribonuclease T2 (Fragment) OS=Homo sapiens GN=RNASET2 PE=1 SV=8 - [D6RHI9_HUMAN]	24.11	7	6	6	9	1.15151e+06	6.59314e+06	7.03548	14.62	3	3	20.3362	24.11	6	6	253	29.0956	6.75635
P20340	Ras-related protein Rab-6A OS=Homo sapiens GN=RAB6A PE=1 SV=3 - [RAB6A_HUMAN]	22.6	29	2	4	9	2.97791e+07	2.47886e+07	7.32052	5.29	1	3	15.0344	22.6	4	6	208	23.5779	5.5415
P29992	Guanine nucleotide-binding protein subunit alpha-11 OS=Homo sapiens GN=GNA11 PE=1 SV=2 - [GNA11_HUMAN]	22.01	6	4	6	9	1.72783e+06	6.29123e+06	6.72638	11.7	3	3	8.20611	22.01	6	6	359	42.0965	5.69385
O43570	Carbonic anhydrase 12 OS=Homo sapiens GN=CA12 PE=1 SV=1 - [CAH12_HUMAN]	20.62	2	5	5	9	1.74955e+06	1.71801e+07	8.6214	12.99	3	3	14.8706	20.62	5	6	354	39.426	7.2251
Q9H2A2	Aldehyde dehydrogenase family 8 member A1 OS=Homo sapiens GN=ALDH8A1 PE=1 SV=1 - [AL8A1_HUMAN]	20.33	2	5	6	9	2.93723e+06	4.87862e+07	8.74044	11.5	3	3	16.1956	16.84	5	6	487	53.3672	7.13721
O75431	Metaxin-2 OS=Homo sapiens GN=MTX2 PE=1 SV=1 - [MTX2_HUMAN]	19.01	3	4	4	9	1.0726e+06	6.27551e+06	5.85382	7.98	2	3	13.2975	19.01	4	6	263	29.7441	6.29053
Q9ULV4	Coronin-1C OS=Homo sapiens GN=CORO1C PE=1 SV=1 - [COR1C_HUMAN]	16.67	9	6	6	9	1.45183e+06	5.57119e+06	5.59093	8.65	3	3	16.8667	16.67	6	6	474	53.2151	7.07861
P23368	NAD-dependent malic enzyme, mitochondrial OS=Homo sapiens GN=ME2 PE=1 SV=1 - [MAOM_HUMAN]	14.21	2	6	7	9	874527	4.31668e+06	4.36165	6.85	3	3	14.3457	11.99	6	6	584	65.4018	7.60596
O00592	Podocalyxin OS=Homo sapiens GN=PODXL PE=1 SV=2 - [PODXL_HUMAN]	12.19	1	6	6	9	1.97009e+06	1.95288e+07	4.72508	5.73	3	3	14.5603	12.19	6	6	558	58.5991	5.49072
H0YMG7	Retinal dehydrogenase 2 OS=Homo sapiens GN=ALDH1A2 PE=1 SV=1 - [H0YMG7_HUMAN]	11.66	3	3	5	9	4.7893e+07	4.28795e+07	7.24756	1.84	2	3	11.6435	11.45	4	6	489	53.7284	6.90283
O96009	Napsin-A OS=Homo sapiens GN=NAPSA PE=1 SV=1 - [NAPSA_HUMAN]	10.95	2	3	3	9	2.42672e+06	1.32114e+07	5.29267	10.95	3	3	16.4436	10.95	3	6	420	45.3578	6.60986
Q9UHB6	LIM domain and actin-binding protein 1 OS=Homo sapiens GN=LIMA1 PE=1 SV=1 - [LIMA1_HUMAN]	10.67	6	7	7	9	500330	1.04927e+06	3.86171	3.29	2	3	7.24088	9.35	6	6	759	85.1734	6.84424
B1AHL2	Fibulin-1 OS=Homo sapiens GN=FBLN1 PE=1 SV=1 - [B1AHL2_HUMAN]	7.91	1	1	4	9	1.00903e+06	5.34192e+06	2.08719	5.13	3	3	8.9519	7.91	4	6	721	78.2769	5.38916
P02730	Band 3 anion transport protein OS=Homo sapiens GN=SLC4A1 PE=1 SV=3 - [B3AT_HUMAN]	7.57	2	5	5	9	363045	3.33293e+06	6.69971	2.41	2	3	10.2027	6.15	4	6	911	101.727	5.18604
O14949	Cytochrome b-c1 complex subunit 8 OS=Homo sapiens GN=UQCRQ PE=1 SV=4 - [QCR8_HUMAN]	48.78	1	5	5	8	5.0018e+06	9.64178e+06	4.88335	24.39	2	2	16.1482	48.78	5	6	82	9.90012	10.0815
P61254	60S ribosomal protein L26 OS=Homo sapiens GN=RPL26 PE=1 SV=1 - [RL26_HUMAN]	36.55	11	5	5	8	1.86317e+06	3.21908e+06	2.66725	15.17	2	2	9.34075	36.55	5	6	145	17.2475	10.5503
P62269	40S ribosomal protein S18 OS=Homo sapiens GN=RPS18 PE=1 SV=3 - [RS18_HUMAN]	32.89	4	5	5	8	4.32549e+06	1.05335e+07	5.56769	7.89	1	2	12.1697	32.89	5	6	152	17.7079	10.9897
O95372	Acyl-protein thioesterase 2 OS=Homo sapiens GN=LYPLA2 PE=1 SV=1 - [LYPA2_HUMAN]	30.3	7	4	4	8	2.8014e+06	4.90626e+06	4.78783	11.26	2	2	11.9893	30.3	4	6	231	24.7207	7.2251
O75223	Gamma-glutamylcyclotransferase OS=Homo sapiens GN=GGCT PE=1 SV=1 - [GGCT_HUMAN]	29.79	4	4	4	8	1.83339e+06	6.48834e+06	5.84882	14.36	2	2	15.4976	29.79	4	6	188	20.9943	5.13525
P52788	Spermine synthase OS=Homo sapiens GN=SMS PE=1 SV=2 - [SPSY_HUMAN]	28.69	2	7	7	8	1.018e+06	6.07022e+06	4.53563	5.19	2	2	12.3876	25.68	6	6	366	41.2418	5.021
P46777	60S ribosomal protein L5 OS=Homo sapiens GN=RPL5 PE=1 SV=3 - [RL5_HUMAN]	23.57	2	5	5	8	1.4921e+06	5.35748e+06	1.63376	8.75	2	2	14.1491	23.57	5	6	297	34.3407	9.71533
Q9NX46	Poly(ADP-ribose) glycohydrolase ARH3 OS=Homo sapiens GN=ADPRHL2 PE=1 SV=1 - [ARHL2_HUMAN]	21.76	1	6	6	8	1.39379e+06	3.98968e+06	4.99427	7.71	2	2	9.34197	17.36	5	6	363	38.9222	5.07178
Q06210	Glutamine--fructose-6-phosphate aminotransferase [isomerizing] 1 OS=Homo sapiens GN=GFPT1 PE=1 SV=3 - [GFPT1_HUMAN]	16.31	2	7	7	8	1.13716e+06	1.61257e+06	3.33958	4.72	2	2	6.98715	13.45	6	6	699	78.7563	7.10791
P08183	Multidrug resistance protein 1 OS=Homo sapiens GN=ABCB1 PE=1 SV=3 - [MDR1_HUMAN]	6.56	2	6	6	8	1.2014e+06	3.4156e+06	3.49361	1.41	2	2	14.8771	5.86	5	6	1280	141.389	8.99756
A0A0U1RQF0	Fatty acid synthase OS=Homo sapiens GN=FASN PE=1 SV=1 - [A0A0U1RQF0_HUMAN]	4.7	3	8	8	8	231662	3.3172e+06	0	0.92	2	2	8.66543	3.79	6	6	2509	273.026	6.46826
P58546	Myotrophin OS=Homo sapiens GN=MTPN PE=1 SV=2 - [MTPN_HUMAN]	77.12	2	5	5	7	0	8.19959e+06	2.18936	11.02	1	1	16.2851	77.12	5	6	118	12.8866	5.51611
H3BUX2	Cytochrome b5 type B OS=Homo sapiens GN=CYB5B PE=1 SV=1 - [H3BUX2_HUMAN]	55.71	5	5	5	7	2.41578e+06	8.33358e+06	0	24.29	1	1	20.2188	55.71	5	6	140	15.7069	6.1001
O43399	Tumor protein D54 OS=Homo sapiens GN=TPD52L2 PE=1 SV=2 - [TPD54_HUMAN]	39.81	3	6	6	7	613264	6.88536e+06	1.70018	5.34	1	1	12.8085	39.81	6	6	206	22.2243	5.36377
A0A087WUL2	Proteasome subunit beta type-3 (Fragment) OS=Homo sapiens GN=PSMB3 PE=1 SV=1 - [A0A087WUL2_HUMAN]	37.93	4	4	4	7	819755	7.79853e+06	2.80073	12.41	1	1	15.9265	37.93	4	6	145	16.1501	8.42627
S4R3P5	Cob(I)yrinic acid a,c-diamide adenosyltransferase, mitochondrial OS=Homo sapiens GN=MMAB PE=1 SV=1 - [S4R3P5_HUMAN]	23.23	3	3	3	7	1.01605e+06	4.63247e+06	2.86983	5.05	1	1	7.8699	23.23	3	6	198	21.7621	8.45557
P09543	2',3'-cyclic-nucleotide 3'-phosphodiesterase OS=Homo sapiens GN=CNP PE=1 SV=2 - [CN37_HUMAN]	20.67	5	6	6	7	1.19697e+06	3.25363e+06	2.57094	2.61	1	1	15.7705	20.67	6	6	421	47.5487	9.0708
Q9Y305	Acyl-coenzyme A thioesterase 9, mitochondrial OS=Homo sapiens GN=ACOT9 PE=1 SV=2 - [ACOT9_HUMAN]	16.4	3	6	6	7	927812	3.57607e+06	0	2.96	1	1	11.8018	16.4	6	6	439	49.8695	8.60205
A0A087WY71	AP-2 complex subunit mu OS=Homo sapiens GN=AP2M1 PE=1 SV=1 - [A0A087WY71_HUMAN]	15.21	4	4	4	7	2.33355e+06	3.44896e+06	2.27183	4.61	1	1	15.6691	15.21	4	6	434	49.495	9.53955
Q14108	Lysosome membrane protein 2 OS=Homo sapiens GN=SCARB2 PE=1 SV=2 - [SCRB2_HUMAN]	14.85	2	4	4	7	3.04537e+06	1.1434e+07	1.96517	2.09	1	1	16.1992	14.85	4	6	478	54.2555	5.13525
O14936	Peripheral plasma membrane protein CASK OS=Homo sapiens GN=CASK PE=1 SV=3 - [CSKP_HUMAN]	10.58	4	6	6	7	950706	3.05733e+06	1.8018	1.08	1	1	15.777	10.58	6	6	926	105.056	6.43018
O43301	Heat shock 70 kDa protein 12A OS=Homo sapiens GN=HSPA12A PE=1 SV=2 - [HS12A_HUMAN]	10.07	6	6	6	7	847272	2.12941e+06	1.85488	1.78	1	1	8.83656	10.07	6	6	675	74.9315	6.771
A0A0C4DGB5	Calpastatin OS=Homo sapiens GN=CAST PE=1 SV=1 - [A0A0C4DGB5_HUMAN]	7.69	21	5	5	7	663825	3.13027e+06	0	1.72	1	1	8.51486	7.69	5	6	754	80.9502	5.09717
P20020	Plasma membrane calcium-transporting ATPase 1 OS=Homo sapiens GN=ATP2B1 PE=1 SV=3 - [AT2B1_HUMAN]	6.44	5	1	6	7	369829	2.48869e+06	1.93959	0.87	1	1	9.41057	6.44	6	6	1258	138.668	6.03662
P23634	Plasma membrane calcium-transporting ATPase 4 OS=Homo sapiens GN=ATP2B4 PE=1 SV=2 - [AT2B4_HUMAN]	5.64	4	1	6	7	369829	2.48869e+06	1.93959	0.89	1	1	10.2333	5.64	6	6	1241	137.833	6.59521
P48681	Nestin OS=Homo sapiens GN=NES PE=1 SV=2 - [NEST_HUMAN]	4.75	1	6	6	7	870714	2.03499e+06	2.84821	0.68	1	1	11.3591	4.75	6	6	1621	177.332	4.36084
O15031	Plexin-B2 OS=Homo sapiens GN=PLXNB2 PE=1 SV=3 - [PLXB2_HUMAN]	4.68	4	6	6	7	374947	2.25735e+06	0	0.38	1	1	6.32997	4.68	6	6	1838	204.997	6.23975
Q9NZN4	EH domain-containing protein 2 OS=Homo sapiens GN=EHD2 PE=1 SV=2 - [EHD2_HUMAN]	22.28	1	6	6	6	0	5.52055e+06		0			16.0439	22.28	6	6	543	61.1227	6.45557
Q8WUP2	Filamin-binding LIM protein 1 OS=Homo sapiens GN=FBLIM1 PE=1 SV=2 - [FBLI1_HUMAN]	21.72	2	6	6	6	0	5.04224e+06		0			13.9467	21.72	6	6	373	40.6427	6.02393
Q92688	Acidic leucine-rich nuclear phosphoprotein 32 family member B OS=Homo sapiens GN=ANP32B PE=1 SV=1 - [AN32B_HUMAN]	20.72	2	2	4	6	0	8.3575e+06		0			9.71934	20.72	4	6	251	28.7703	4.05615
E7EW69	Septin-10 OS=Homo sapiens GN=SEPT10 PE=1 SV=1 - [E7EW69_HUMAN]	19.33	6	4	5	6	0	5.88255e+06		0			10.6976	19.33	5	6	450	52.1124	6.91748
Q15149	Plectin OS=Homo sapiens GN=PLEC PE=1 SV=3 - [PLEC_HUMAN]	1.11	2	4	5	6	0	3.36445e+06		0			12.7352	1.11	5	6	4684	531.466	5.96045
P14868	Aspartate--tRNA ligase, cytoplasmic OS=Homo sapiens GN=DARS PE=1 SV=2 - [SYDC_HUMAN]	27.74	6	13	13	18	3.18021e+06	3.01631e+06	18.4379	26.15	12	13	6.71481	10.98	5	5	501	57.1	6.55127
J3KND8	Phenylalanine-4-hydroxylase OS=Homo sapiens GN=PAH PE=1 SV=1 - [J3KND8_HUMAN]	39.6	6	12	12	17	8.5739e+06	4.97482e+06	23.022	34	11	12	14.4276	17.9	4	5	447	51.3962	6.68311
Q8WW59	SPRY domain-containing protein 4 OS=Homo sapiens GN=SPRYD4 PE=1 SV=2 - [SPRY4_HUMAN]	37.2	1	6	6	14	2.3778e+06	1.95683e+06	18.274	27.54	5	9	10.0667	32.85	5	5	207	23.114	6.93213
Q99424	Peroxisomal acyl-coenzyme A oxidase 2 OS=Homo sapiens GN=ACOX2 PE=1 SV=1 - [ACOX2_HUMAN]	19.68	5	11	11	14	3.4857e+06	4.80744e+06	16.2845	17.33	9	9	14.1334	8.81	5	5	681	76.778	7.56201
P43243	Matrin-3 OS=Homo sapiens GN=MATR3 PE=1 SV=2 - [MATR3_HUMAN]	15.7	20	9	9	14	2.52134e+06	2.82305e+06	17.1766	15.7	9	9	13.2075	9.92	5	5	847	94.5648	6.25244
P04424	Argininosuccinate lyase OS=Homo sapiens GN=ASL PE=1 SV=4 - [ARLY_HUMAN]	16.38	2	6	6	13	7.48683e+06	1.01374e+07	15.9681	12.07	5	8	13.4419	14.01	5	5	464	51.6253	6.48096
P55795	Heterogeneous nuclear ribonucleoprotein H2 OS=Homo sapiens GN=HNRNPH2 PE=1 SV=1 - [HNRH2_HUMAN]	16.04	1	2	6	12	7.90001e+06	1.24864e+07	22.3378	16.04	6	7	13.0743	11.58	4	5	449	49.2323	6.30322
Q96RP9	Elongation factor G, mitochondrial OS=Homo sapiens GN=GFM1 PE=1 SV=2 - [EFGM_HUMAN]	13.58	3	9	9	12	2.21569e+06	3.82548e+06	7.708	7.99	6	7	6.83389	8.39	5	5	751	83.4184	7.00537
Q96GA7	Serine dehydratase-like OS=Homo sapiens GN=SDSL PE=1 SV=1 - [SDSL_HUMAN]	33.13	4	7	7	11	3.48979e+06	4.87012e+06	9.13152	20.06	5	6	14.1468	26.75	5	5	329	34.6521	6.88818
Q9UL25	Ras-related protein Rab-21 OS=Homo sapiens GN=RAB21 PE=1 SV=3 - [RAB21_HUMAN]	22.22	1	4	4	11	2.30078e+06	7.56383e+06	10.4616	16.89	3	6	13.9956	22.22	4	5	225	24.3323	7.94287
D6RJ96	Heat shock 70 kDa protein 4L (Fragment) OS=Homo sapiens GN=HSPA4L PE=1 SV=1 - [D6RJ96_HUMAN]	12.43	3	3	5	11	3.58125e+06	8.5855e+06	9.74131	10.36	4	6	11.9085	12.43	5	5	531	59.1588	6.53662
P82909	28S ribosomal protein S36, mitochondrial OS=Homo sapiens GN=MRPS36 PE=1 SV=2 - [RT36_HUMAN]	61.17	2	5	5	10	4.69301e+06	4.86385e+06	13.9622	40.78	4	5	14.0987	48.54	4	5	103	11.459	9.99365
O43598	2'-deoxynucleoside 5'-phosphate N-hydrolase 1 OS=Homo sapiens GN=DNPH1 PE=1 SV=1 - [DNPH1_HUMAN]	43.1	2	6	6	10	1.62127e+07	3.45149e+07	10.0401	32.76	4	5	11.6821	28.74	4	5	174	19.0966	5.04639
G3V203	60S ribosomal protein L18 OS=Homo sapiens GN=RPL18 PE=1 SV=1 - [G3V203_HUMAN]	29.88	7	5	5	10	4.07565e+06	1.40218e+07	14.427	29.88	5	5	14.8371	29.88	5	5	164	18.7445	11.5903
J3QL14	V-type proton ATPase subunit d 1 (Fragment) OS=Homo sapiens GN=ATP6V0D1 PE=1 SV=1 - [J3QL14_HUMAN]	23.28	4	5	5	10	4.61625e+06	8.31563e+06	3.99774	23.28	5	5	10.34	19.83	4	5	232	26.7983	4.94482
P30740	Leukocyte elastase inhibitor OS=Homo sapiens GN=SERPINB1 PE=1 SV=1 - [ILEU_HUMAN]	22.69	4	6	7	10	1.08978e+06	3.60848e+06	6.9079	13.72	5	5	14.2183	16.36	5	5	379	42.7147	6.27783
P62714	Serine/threonine-protein phosphatase 2A catalytic subunit beta isoform OS=Homo sapiens GN=PPP2CB PE=1 SV=1 - [PP2AB_HUMAN]	21.36	10	1	6	10	1.43525e+06	2.61178e+06	8.54556	21.36	5	5	10.113	16.83	5	5	309	35.5523	5.42725
P55036	26S proteasome non-ATPase regulatory subunit 4 OS=Homo sapiens GN=PSMD4 PE=1 SV=1 - [PSMD4_HUMAN]	20.42	6	5	5	10	1.62369e+06	1.6326e+06	10.7047	13.53	4	5	12.6171	17.77	4	5	377	40.7112	4.79248
Q9UEY8	Gamma-adducin OS=Homo sapiens GN=ADD3 PE=1 SV=1 - [ADDG_HUMAN]	17.85	1	8	8	10	1.99279e+06	4.93288e+06	5.9268	8.5	5	5	13.1463	12.89	5	5	706	79.1052	6.31592
Q13247	Serine/arginine-rich splicing factor 6 OS=Homo sapiens GN=SRSF6 PE=1 SV=2 - [SRSF6_HUMAN]	15.12	5	3	5	10	4.21095e+06	7.41847e+06	11.0948	13.08	4	5	13.3822	12.5	4	5	344	39.5634	11.4292
O00330	Pyruvate dehydrogenase protein X component, mitochondrial OS=Homo sapiens GN=PDHX PE=1 SV=3 - [ODPX_HUMAN]	14.57	4	6	6	10	1.41945e+06	1.19979e+06	9.12747	10.98	4	5	11.8081	10.18	4	5	501	54.0888	8.66064
A0A0A0MSM0	Heat shock protein 105 kDa OS=Homo sapiens GN=HSPH1 PE=1 SV=1 - [A0A0A0MSM0_HUMAN]	10.49	3	3	5	10	3.38155e+06	8.02586e+06	10.2172	5.88	3	5	12.9087	10.49	5	5	782	88.7857	5.60498
P11279	Lysosome-associated membrane glycoprotein 1 OS=Homo sapiens GN=LAMP1 PE=1 SV=3 - [LAMP1_HUMAN]	9.83	1	4	4	10	8.93632e+06	3.0808e+07	7.92521	9.83	4	5	13.9584	9.83	3	5	417	44.8538	8.74854
Q8WVC2	40S ribosomal protein S21 OS=Homo sapiens GN=RPS21 PE=1 SV=1 - [Q8WVC2_HUMAN]	46.91	3	3	3	9	4.82029e+06	5.75805e+06	8.46013	33.33	2	4	14.9289	46.91	3	5	81	8.84446	8.49951
P56381	ATP synthase subunit epsilon, mitochondrial OS=Homo sapiens GN=ATP5E PE=1 SV=2 - [ATP5E_HUMAN]	45.1	2	3	3	9	1.16907e+07	3.0839e+07	6.1021	45.1	3	4	8.63389	45.1	3	5	51	5.77611	9.92041
Q13404	Ubiquitin-conjugating enzyme E2 variant 1 OS=Homo sapiens GN=UBE2V1 PE=1 SV=2 - [UB2V1_HUMAN]	40.14	7	2	5	9	3.68994e+06	6.15825e+06	9.45515	34.69	4	4	7.3569	29.93	4	5	147	16.4843	7.92822
G3V2S6	V-type proton ATPase subunit D OS=Homo sapiens GN=ATP6V1D PE=1 SV=1 - [G3V2S6_HUMAN]	33.85	9	4	4	9	3.34707e+06	9252179	6.43442	33.85	4	4	13.7512	19.27	3	5	192	21.9077	5.75732
Q9BY49	Peroxisomal trans-2-enoyl-CoA reductase OS=Homo sapiens GN=PECR PE=1 SV=2 - [PECR_HUMAN]	29.37	2	6	6	9	805349	3.89384e+06	6.66959	14.19	4	4	12.0381	22.44	4	5	303	32.5239	8.80713
P17568	NADH dehydrogenase [ubiquinone] 1 beta subcomplex subunit 7 OS=Homo sapiens GN=NDUFB7 PE=1 SV=4 - [NDUB7_HUMAN]	26.28	1	4	4	9	1.03724e+06	4.28793e+06	4.62169	19.71	3	4	7.45472	24.82	3	5	137	16.3913	8.92432
O15229	Kynurenine 3-monooxygenase OS=Homo sapiens GN=KMO PE=1 SV=2 - [KMO_HUMAN]	26.13	2	8	8	9	1.86388e+06	2.95395e+06	6.90258	11.73	4	4	13.5238	18.11	5	5	486	55.7734	9.02686
P61020	Ras-related protein Rab-5B OS=Homo sapiens GN=RAB5B PE=1 SV=1 - [RAB5B_HUMAN]	26.05	9	3	4	9	3.87414e+06	6.60923e+06	8.62314	17.21	3	4	11.6566	26.05	4	5	215	23.6919	8.1333
P67775	Serine/threonine-protein phosphatase 2A catalytic subunit alpha isoform OS=Homo sapiens GN=PPP2CA PE=1 SV=1 - [PP2AA_HUMAN]	21.36	10	1	6	9	1.43525e+06	2.72517e+06	6.92904	18.77	4	4	10.2525	16.83	5	5	309	35.5714	5.5415
J3QL05	Serine/arginine-rich-splicing factor 2 (Fragment) OS=Homo sapiens GN=SRSF2 PE=1 SV=1 - [J3QL05_HUMAN]	19.23	4	2	2	9	6.23541e+06	1.46776e+07	8.17995	19.23	2	4	10.2505	19.23	2	5	130	15.1466	10.9604
O00231	26S proteasome non-ATPase regulatory subunit 11 OS=Homo sapiens GN=PSMD11 PE=1 SV=3 - [PSD11_HUMAN]	18.72	3	7	7	9	1.8877e+06	3.08293e+06	5.67792	10.19	4	4	11.6107	13.98	5	5	422	47.434	6.48096
O75439	Mitochondrial-processing peptidase subunit beta OS=Homo sapiens GN=PMPCB PE=1 SV=2 - [MPPB_HUMAN]	17.79	5	6	6	9	4.23876e+06	7.69945e+06	8.75899	10.02	4	4	8.21074	13.91	5	5	489	54.3315	6.82959
P62191	26S protease regulatory subunit 4 OS=Homo sapiens GN=PSMC1 PE=1 SV=1 - [PRS4_HUMAN]	15.91	3	4	5	9	3.11434e+06	4.97446e+06	7.06277	11.14	4	4	9.66735	13.18	4	5	440	49.1537	6.21436
Q13347	Eukaryotic translation initiation factor 3 subunit I OS=Homo sapiens GN=EIF3I PE=1 SV=1 - [EIF3I_HUMAN]	15.08	2	5	5	9	1.72019e+06	3.70951e+06	8.80007	9.85	3	4	9.74141	12.31	4	5	325	36.4786	5.64307
Q1EHB4	Sodium-coupled monocarboxylate transporter 2 OS=Homo sapiens GN=SLC5A12 PE=2 SV=2 - [SC5AC_HUMAN]	8.41	1	4	4	9	2.63585e+06	5.59013e+06	9.82134	6.15	3	4	13.7973	6.31	3	5	618	67.6026	8.104
P55884	Eukaryotic translation initiation factor 3 subunit B OS=Homo sapiens GN=EIF3B PE=1 SV=3 - [EIF3B_HUMAN]	8.11	3	5	5	9	1.24948e+06	3.30282e+06	7.31255	4.42	3	4	12.0017	8.11	5	5	814	92.4238	4.99561
Q14344	Guanine nucleotide-binding protein subunit alpha-13 OS=Homo sapiens GN=GNA13 PE=1 SV=2 - [GNA13_HUMAN]	7.69	9	1	3	9	1.09679e+07	2.41801e+07	8.29014	5.57	2	4	11.1045	7.69	3	5	377	44.0217	8.00146
I3L2B0	Clustered mitochondria protein homolog (Fragment) OS=Homo sapiens GN=CLUH PE=1 SV=2 - [I3L2B0_HUMAN]	6.15	4	7	7	9	1.11795e+06	2.19142e+06	6.17554	3.88	4	4	6.88394	4.29	5	5	1236	138.142	6.03662
Q15847	Adipogenesis regulatory factor OS=Homo sapiens GN=ADIRF PE=1 SV=1 - [ADIRF_HUMAN]	71.05	2	5	5	8	1.9453e+06	6.97163e+06	6.9359	30.26	3	3	10.5142	71.05	4	5	76	7.84997	5.31299
O95182	NADH dehydrogenase [ubiquinone] 1 alpha subcomplex subunit 7 OS=Homo sapiens GN=NDUFA7 PE=1 SV=3 - [NDUA7_HUMAN]	47.79	3	5	5	8	4.99482e+06	9.03957e+06	6.31941	35.4	3	3	11.2356	47.79	4	5	113	12.5436	10.1841
Q04837	Single-stranded DNA-binding protein, mitochondrial OS=Homo sapiens GN=SSBP1 PE=1 SV=1 - [SSBP_HUMAN]	41.22	4	4	4	8	3.51485e+06	7.05292e+06	5.56276	15.54	2	3	14.0624	41.22	4	5	148	17.249	9.59814
P02656	Apolipoprotein C-III OS=Homo sapiens GN=APOC3 PE=1 SV=1 - [APOC3_HUMAN]	36.36	2	2	2	8	6.5417e+06	2.15628e+07	8.1953	16.16	1	3	16.164	36.36	2	5	99	10.8455	5.41455
O60814	Histone H2B type 1-K OS=Homo sapiens GN=HIST1H2BK PE=1 SV=3 - [H2B1K_HUMAN]	35.71	16	3	4	8	1.23906e+06	4.11756e+06	3.40031	17.46	2	3	10.3671	35.71	4	5	126	13.8816	10.3159
Q96BM9	ADP-ribosylation factor-like protein 8A OS=Homo sapiens GN=ARL8A PE=1 SV=1 - [ARL8A_HUMAN]	35.48	2	1	5	8	2.4924e+06	6.26912e+06	3.99183	9.68	2	3	9.19993	35.48	5	5	186	21.402	7.76709
O75264	Small integral membrane protein 24 OS=Homo sapiens GN=SMIM24 PE=2 SV=2 - [SIM24_HUMAN]	33.85	2	3	3	8	2.57648e+06	4.69955e+06	2.407	33.85	3	3	10.274	33.85	3	5	130	14.9548	5.2876
Q9NVJ2	ADP-ribosylation factor-like protein 8B OS=Homo sapiens GN=ARL8B PE=1 SV=1 - [ARL8B_HUMAN]	32.8	2	1	5	8	2.4924e+06	7.39161e+06	3.99183	9.68	2	3	10.9261	32.8	5	5	186	21.5251	8.42627
Q99436	Proteasome subunit beta type-7 OS=Homo sapiens GN=PSMB7 PE=1 SV=1 - [PSB7_HUMAN]	30.32	2	4	4	8	1.36618e+06	6.60751e+06	6.38778	8.3	2	3	7.67351	30.32	4	5	277	29.9462	7.6792
P14406	Cytochrome c oxidase subunit 7A2, mitochondrial OS=Homo sapiens GN=COX7A2 PE=1 SV=1 - [CX7A2_HUMAN]	30.12	5	3	3	8	3.20142e+07	4.4626e+07	9.03707	30.12	2	3	15.7934	30.12	3	5	83	9.39011	9.75928
H0YH88	Nucleosome assembly protein 1-like 1 (Fragment) OS=Homo sapiens GN=NAP1L1 PE=1 SV=1 - [H0YH88_HUMAN]	28.81	16	3	4	8	1.09681e+06	2.43642e+06	1.8739	15.82	2	3	13.2645	23.16	3	5	177	21.0635	4.83057
P84095	Rho-related GTP-binding protein RhoG OS=Homo sapiens GN=RHOG PE=1 SV=1 - [RHOG_HUMAN]	26.7	7	2	3	8	7.16023e+06	1.29561e+07	8.78183	15.71	2	3	7.8442	26.7	3	5	191	21.2949	8.11865
P62070	Ras-related protein R-Ras2 OS=Homo sapiens GN=RRAS2 PE=1 SV=1 - [RRAS2_HUMAN]	26.47	4	2	4	8	2.12155e+06	4.28861e+06	5.47606	11.27	2	3	8.84259	26.47	4	5	204	23.3847	6.01123
Q8NCW5	NAD(P)H-hydrate epimerase OS=Homo sapiens GN=NAXE PE=1 SV=2 - [NNRE_HUMAN]	24.31	3	4	4	8	4.74428e+06	1.05062e+07	4.53552	12.15	2	3	14.3001	24.31	4	5	288	31.6542	7.66455
Q9Y265	RuvB-like 1 OS=Homo sapiens GN=RUVBL1 PE=1 SV=1 - [RUVB1_HUMAN]	23.25	5	7	7	8	1.35823e+06	4.69129e+06	2.27832	9.21	3	3	12.0854	16.67	5	5	456	50.1963	6.41748
P46781	40S ribosomal protein S9 OS=Homo sapiens GN=RPS9 PE=1 SV=3 - [RS9_HUMAN]	21.65	5	5	5	8	2.39387e+06	8.30164e+06	3.82901	13.92	3	3	10.2369	21.65	5	5	194	22.5776	10.6528
Q92747	Actin-related protein 2/3 complex subunit 1A OS=Homo sapiens GN=ARPC1A PE=1 SV=2 - [ARC1A_HUMAN]	20.54	2	4	5	8	2.88102e+06	1.14986e+07	4.63375	11.08	3	3	11.9712	18.38	4	5	370	41.5427	8.17725
O43852	Calumenin OS=Homo sapiens GN=CALU PE=1 SV=2 - [CALU_HUMAN]	19.05	2	6	6	8	2.00238e+06	4.13609e+06	6.54555	10.79	3	3	11.3452	16.51	5	5	315	37.0835	4.64014
P01766	Immunoglobulin heavy variable 3-13 OS=Homo sapiens GN=IGHV3-13 PE=1 SV=2 - [HV313_HUMAN]	18.97	6	1	2	8	3.48136e+06	5.39743e+06	1.75875	9.48	1	3	13.5365	18.97	2	5	116	12.4982	7.07861
A6PVN5	Serine/threonine-protein phosphatase 2A activator OS=Homo sapiens GN=PTPA PE=1 SV=1 - [A6PVN5_HUMAN]	17.02	16	4	4	8	3.4795e+06	4.74887e+06	4.44872	6.99	2	3	12.6958	17.02	4	5	329	37.352	6.29053
P21283	V-type proton ATPase subunit C 1 OS=Homo sapiens GN=ATP6V1C1 PE=1 SV=4 - [VATC1_HUMAN]	15.97	2	6	6	8	2.13036e+06	3.70761e+06	6.57238	6.81	3	3	10.7634	15.97	5	5	382	43.914	7.45947
P52597	Heterogeneous nuclear ribonucleoprotein F OS=Homo sapiens GN=HNRNPF PE=1 SV=3 - [HNRPF_HUMAN]	15.9	2	3	4	8	1.6331e+06	4.92737e+06	3.88579	7.95	2	3	9.66365	15.9	4	5	415	45.6429	5.57959
O75323	Protein NipSnap homolog 2 OS=Homo sapiens GN=GBAS PE=1 SV=1 - [NIPS2_HUMAN]	15.38	5	4	4	8	5.23508e+06	6.59797e+06	6.85445	5.94	2	3	11.8149	15.38	4	5	286	33.7212	9.36377
A0A0C4DH22	Band 4.1-like protein 1 OS=Homo sapiens GN=EPB41L1 PE=1 SV=1 - [A0A0C4DH22_HUMAN]	11.25	9	5	7	8	1.0343e+06	2.36011e+06	8.41582	5.57	3	3	2.41026	9.43	5	5	880	98.3141	5.61768
P31323	cAMP-dependent protein kinase type II-beta regulatory subunit OS=Homo sapiens GN=PRKAR2B PE=1 SV=3 - [KAP3_HUMAN]	11	1	1	3	8	2.45896e+06	6.63137e+06	3.52333	6.94	2	3	13.44	11	3	5	418	46.2729	4.91943
Q32MZ4	Leucine-rich repeat flightless-interacting protein 1 OS=Homo sapiens GN=LRRFIP1 PE=1 SV=2 - [LRRF1_HUMAN]	10.77	3	5	5	8	491549	1.81349e+06	7.61473	6.93	3	3	6.28243	10.77	5	5	808	89.1987	4.65283
Q08211	ATP-dependent RNA helicase A OS=Homo sapiens GN=DHX9 PE=1 SV=4 - [DHX9_HUMAN]	5.28	1	5	5	8	536388	2.34943e+06	3.75262	3.15	3	3	6.15126	5.28	5	5	1270	140.869	6.84424
O14548	Cytochrome c oxidase subunit 7A-related protein, mitochondrial OS=Homo sapiens GN=COX7A2L PE=1 SV=2 - [COX7R_HUMAN]	61.4	4	5	5	7	6.67792e+06	8.02725e+06	2.99148	19.3	2	2	5.49478	61.4	5	5	114	12.6065	9.42236
P56385	ATP synthase subunit e, mitochondrial OS=Homo sapiens GN=ATP5I PE=1 SV=2 - [ATP5I_HUMAN]	44.93	1	3	3	7	5.52859e+07	4.42514e+07	6.0756	14.49	1	2	14.0597	44.93	3	5	69	7.92833	9.34912
E9PLL6	60S ribosomal protein L27a OS=Homo sapiens GN=RPL27A PE=1 SV=1 - [E9PLL6_HUMAN]	44.44	4	4	4	7	6.30042e+06	7.31806e+06	4.01584	10.19	1	2	11.6363	44.44	4	5	108	12.1935	11.4585
Q15819	Ubiquitin-conjugating enzyme E2 variant 2 OS=Homo sapiens GN=UBE2V2 PE=1 SV=4 - [UB2V2_HUMAN]	30.34	6	1	4	7	3.77487e+06	4.67982e+06	4.62488	13.79	2	2	4.89671	30.34	4	5	145	16.3522	8.08936
M0R0F0	40S ribosomal protein S5 (Fragment) OS=Homo sapiens GN=RPS5 PE=1 SV=1 - [M0R0F0_HUMAN]	29	4	4	4	7	257017	3.21004e+06	4.48339	11.5	2	2	11.5066	29	4	5	200	22.3768	9.5542
F8W7C6	60S ribosomal protein L10 OS=Homo sapiens GN=RPL10 PE=1 SV=2 - [F8W7C6_HUMAN]	28.22	8	4	4	7	778464	3.31487e+06	0	14.11	2	2	8.67724	28.22	4	5	163	18.5527	9.94971
P55263	Adenosine kinase OS=Homo sapiens GN=ADK PE=1 SV=2 - [ADK_HUMAN]	25.97	1	5	5	7	649352	4.31926e+06	0	7.18	2	2	8.7408	25.97	5	5	362	40.5197	6.69775
K7EJL1	AP-1 complex subunit mu-1 OS=Homo sapiens GN=AP1M1 PE=1 SV=1 - [K7EJL1_HUMAN]	24.5	8	5	6	7	1.96784e+06	4.66315e+06	1.9683	5.98	2	2	12.4707	21.65	5	5	351	40.2709	7.59131
A0A087WTB8	Ubiquitin carboxyl-terminal hydrolase OS=Homo sapiens GN=UCHL3 PE=1 SV=1 - [A0A087WTB8_HUMAN]	24.23	3	3	3	7	296244	1.92284e+06	1.87907	6.7	1	2	11.6887	24.23	3	5	194	21.9309	4.93213
K7EK42	Tubulin-folding cofactor B OS=Homo sapiens GN=TBCB PE=1 SV=1 - [K7EK42_HUMAN]	22.51	4	5	5	7	1.89135e+06	3.49088e+06	4.16441	8.9	2	2	10.806	22.51	5	5	191	21.2825	5.31299
P17931	Galectin-3 OS=Homo sapiens GN=LGALS3 PE=1 SV=5 - [LEG3_HUMAN]	20	2	4	4	7	2.10865e+06	3.61544e+06	2.27297	9.6	2	2	12.6156	20	4	5	250	26.1361	8.55811
P36955	Pigment epithelium-derived factor OS=Homo sapiens GN=SERPINF1 PE=1 SV=4 - [PEDF_HUMAN]	19.86	6	5	5	7	1.42236e+06	2.65723e+06	2.14339	5.5	2	2	8.69289	19.86	5	5	418	46.2833	6.37939
P50552	Vasodilator-stimulated phosphoprotein OS=Homo sapiens GN=VASP PE=1 SV=3 - [VASP_HUMAN]	19.74	5	6	6	7	827839	1.88179e+06	3.26903	6.32	2	2	10.1348	16.58	5	5	380	39.8051	8.93896
P49755	Transmembrane emp24 domain-containing protein 10 OS=Homo sapiens GN=TMED10 PE=1 SV=2 - [TMEDA_HUMAN]	18.72	2	4	4	7	2.51633e+06	6.40071e+06	5.36871	10.96	2	2	15.2208	15.53	3	5	219	24.96	7.44482
Q9H479	Fructosamine-3-kinase OS=Homo sapiens GN=FN3K PE=1 SV=1 - [FN3K_HUMAN]	18.45	1	4	4	7	2.84531e+06	3.90758e+06	4.98216	9.06	2	2	12.8731	18.45	4	5	309	35.1489	7.54736
A0A0C4DFV9	Protein SET OS=Homo sapiens GN=SET PE=1 SV=1 - [A0A0C4DFV9_HUMAN]	15.79	4	4	4	7	6.77227e+06	2.13482e+07	6.65356	8.65	2	2	16.5052	15.79	4	5	266	31.1053	4.23389
O60784	Target of Myb protein 1 OS=Homo sapiens GN=TOM1 PE=1 SV=2 - [TOM1_HUMAN]	15.24	6	5	5	7	679904	4.31409e+06	5.75586	4.88	2	2	11.2624	15.24	5	5	492	53.7849	4.70361
Q96CN7	Isochorismatase domain-containing protein 1 OS=Homo sapiens GN=ISOC1 PE=1 SV=3 - [ISOC1_HUMAN]	14.77	2	3	3	7	929301	3.6299e+06	3.89079	8.39	2	2	7.89949	14.77	3	5	298	32.2161	7.38623
Q9Y394	Dehydrogenase/reductase SDR family member 7 OS=Homo sapiens GN=DHRS7 PE=1 SV=1 - [DHRS7_HUMAN]	12.98	4	3	3	7	1.87459e+06	9.24538e+06	1.89904	7.08	2	2	15.6452	12.98	3	5	339	38.2741	8.32373
Q9UKG1	DCC-interacting protein 13-alpha OS=Homo sapiens GN=APPL1 PE=1 SV=1 - [DP13A_HUMAN]	12.69	3	6	6	7	1.00777e+06	3.28805e+06	2.31288	4.09	2	2	10.0388	11	5	5	709	79.6136	5.41455
C9JGI3	Thymidine phosphorylase (Fragment) OS=Homo sapiens GN=TYMP PE=1 SV=1 - [C9JGI3_HUMAN]	12.58	2	4	4	7	343716	2.32607e+06	4.28348	7.42	2	2	10.0529	12.58	4	5	445	46.0582	5.51611
P12821	Angiotensin-converting enzyme OS=Homo sapiens GN=ACE PE=1 SV=1 - [ACE_HUMAN]	6.66	7	6	6	7	2.28349e+06	5.25096e+06	4.08552	1.53	2	2	14.7977	5.9	5	5	1306	149.62	6.39209
P46977	Dolichyl-diphosphooligosaccharide--protein glycosyltransferase subunit STT3A OS=Homo sapiens GN=STT3A PE=1 SV=2 - [STT3A_HUMAN]	5.53	1	4	4	7	88872.2	3.72409e+06	3.61215	3.26	2	2	11.221	5.53	4	5	705	80.4768	8.07471
I6L894	Ankyrin-2 OS=Homo sapiens GN=ANK2 PE=1 SV=1 - [I6L894_HUMAN]	1.27	9	2	4	7	1.28066e+06	3.3512e+06	4.15806	0.54	2	2	7.32823	1.27	4	5	3924	429.99	5.12256
E5RGR0	Acyl-protein thioesterase 1 (Fragment) OS=Homo sapiens GN=LYPLA1 PE=1 SV=1 - [E5RGR0_HUMAN]	39.59	5	4	4	6	255507	7.57682e+06	3.5381	7.11	1	1	7.70208	39.59	4	5	197	20.8476	7.06396
Q9BWD1	Acetyl-CoA acetyltransferase, cytosolic OS=Homo sapiens GN=ACAT2 PE=1 SV=2 - [THIC_HUMAN]	39.04	1	6	6	6	1.12242e+06	4.65744e+06	0	8.31	1	1	10.9681	30.73	5	5	397	41.3244	6.91748
P04229	HLA class II histocompatibility antigen, DRB1-1 beta chain OS=Homo sapiens GN=HLA-DRB1 PE=1 SV=2 - [2B11_HUMAN]	31.58	10	3	5	6	0	6.91639e+06	1.60749	3.38	1	1	9.60264	31.58	5	5	266	29.895	7.69385
P60903	Protein S100-A10 OS=Homo sapiens GN=S100A10 PE=1 SV=2 - [S10AA_HUMAN]	30.93	1	3	3	6	2.81978e+06	1.29857e+07	2.68413	17.53	1	1	12.4077	30.93	3	5	97	11.1955	7.37158
Q9BVK6	Transmembrane emp24 domain-containing protein 9 OS=Homo sapiens GN=TMED9 PE=1 SV=2 - [TMED9_HUMAN]	30.21	2	3	4	6	219058	3.5763e+06	0	4.26	1	1	8.71258	30.21	4	5	235	27.2602	8.01611
Q13185	Chromobox protein homolog 3 OS=Homo sapiens GN=CBX3 PE=1 SV=4 - [CBX3_HUMAN]	28.96	8	4	4	6	2.11178e+06	3.356e+06	0	7.1	1	1	7.22022	28.96	4	5	183	20.7984	5.32568
Q9H008	Phospholysine phosphohistidine inorganic pyrophosphate phosphatase OS=Homo sapiens GN=LHPP PE=1 SV=2 - [LHPP_HUMAN]	24.81	2	4	4	6	2.17755e+06	4.42434e+06	2.08481	3.33	1	1	8.59402	24.81	4	5	270	29.1469	6.15088
P28072	Proteasome subunit beta type-6 OS=Homo sapiens GN=PSMB6 PE=1 SV=4 - [PSB6_HUMAN]	22.18	3	5	5	6	3.85807e+06	1.14029e+07	2.00511	4.18	1	1	10.9406	22.18	5	5	239	25.3414	4.91943
Q9NZA1	Chloride intracellular channel protein 5 OS=Homo sapiens GN=CLIC5 PE=1 SV=3 - [CLIC5_HUMAN]	21.71	2	5	5	6	303003	3.14701e+06	0	4.15	1	1	7.21427	21.71	5	5	410	46.4737	4.81787
P27361	Mitogen-activated protein kinase 3 OS=Homo sapiens GN=MAPK3 PE=1 SV=4 - [MK03_HUMAN]	17.94	8	2	5	6	881134	4.62025e+06	3.06857	4.22	1	1	14.4179	17.94	5	5	379	43.1081	6.7417
P05198	Eukaryotic translation initiation factor 2 subunit 1 OS=Homo sapiens GN=EIF2S1 PE=1 SV=3 - [IF2A_HUMAN]	17.46	3	5	5	6	4.60653e+06	3.25909e+06	2.29214	3.81	1	1	6.72907	17.46	5	5	315	36.0894	5.08447
P02750	Leucine-rich alpha-2-glycoprotein OS=Homo sapiens GN=LRG1 PE=1 SV=2 - [A2GL_HUMAN]	17	1	4	4	6	549608	4.56566e+06	2.03928	2.88	1	1	6.87136	17	4	5	347	38.1541	6.94678
Q00688	Peptidyl-prolyl cis-trans isomerase FKBP3 OS=Homo sapiens GN=FKBP3 PE=1 SV=1 - [FKBP3_HUMAN]	15.18	2	3	3	6	386122	4.49887e+06	2.02946	4.91	1	1	12.4405	15.18	3	5	224	25.1613	9.27588
A6NNI4	Tetraspanin OS=Homo sapiens GN=CD9 PE=1 SV=1 - [A6NNI4_HUMAN]	13.21	4	3	3	6	893509	9.98743e+06	2.93769	6.92	1	1	12.8012	13.21	3	5	159	17.752	6.29053
Q12907	Vesicular integral-membrane protein VIP36 OS=Homo sapiens GN=LMAN2 PE=1 SV=1 - [LMAN2_HUMAN]	12.64	5	4	4	6	2.12854e+06	5.6354e+06	1.91393	3.09	1	1	7.46652	12.64	4	5	356	40.2031	6.94678
Q9UHB9	Signal recognition particle subunit SRP68 OS=Homo sapiens GN=SRP68 PE=1 SV=2 - [SRP68_HUMAN]	10.85	1	5	5	6	0	1.67283e+06	0	3.19	1	1	11.44	10.85	5	5	627	70.6856	8.55811
P42785	Lysosomal Pro-X carboxypeptidase OS=Homo sapiens GN=PRCP PE=1 SV=1 - [PCP_HUMAN]	10.69	6	5	5	6	0	2.43593e+06	0	2.42	1	1	10.4982	10.69	5	5	496	55.7639	7.21045
A0A0A0MRK6	Metaxin 1, isoform CRA_b OS=Homo sapiens GN=MTX1 PE=1 SV=1 - [A0A0A0MRK6_HUMAN]	10.09	3	4	4	6	1.57333e+06	3.05513e+06	0	3	1	1	4.74163	10.09	4	5	466	51.4306	9.78857
O15371	Eukaryotic translation initiation factor 3 subunit D OS=Homo sapiens GN=EIF3D PE=1 SV=1 - [EIF3D_HUMAN]	10.04	5	5	5	6	1.4236e+06	2.62597e+06	0	1.46	1	1	6.83431	10.04	5	5	548	63.9324	6.04932
P22059	Oxysterol-binding protein 1 OS=Homo sapiens GN=OSBP PE=1 SV=1 - [OSBP1_HUMAN]	9.54	1	5	5	6	211244	3.71169e+06	1.85308	1.36	1	1	8.25821	9.54	5	5	807	89.3646	7.29834
P55060	Exportin-2 OS=Homo sapiens GN=CSE1L PE=1 SV=3 - [XPO2_HUMAN]	8.34	1	6	6	6	0	1.77836e+06	0	1.75	1	1	12.8793	6.59	5	5	971	110.346	5.77002
Q13621	Solute carrier family 12 member 1 OS=Homo sapiens GN=SLC12A1 PE=1 SV=2 - [S12A1_HUMAN]	6.28	3	5	5	6	297894	3.64832e+06	1.62382	1.18	1	1	8.8928	6.28	5	5	1099	121.372	7.38623
Q9HC35	Echinoderm microtubule-associated protein-like 4 OS=Homo sapiens GN=EML4 PE=1 SV=3 - [EMAL4_HUMAN]	4.99	2	4	4	6	3.07099e+06	3.19675e+06	1.60393	1.22	1	1	9.84572	4.99	4	5	981	108.848	6.40479
P16949	Stathmin OS=Homo sapiens GN=STMN1 PE=1 SV=3 - [STMN1_HUMAN]	30.87	4	4	4	5	0	3.50411e+06		0			11.1819	30.87	4	5	149	17.292	5.97314
Q86Y82	Syntaxin-12 OS=Homo sapiens GN=STX12 PE=1 SV=1 - [STX12_HUMAN]	27.17	2	5	5	5	0	4.48516e+06		0			8.70226	27.17	5	5	276	31.6223	5.59229
O95571	Persulfide dioxygenase ETHE1, mitochondrial OS=Homo sapiens GN=ETHE1 PE=1 SV=2 - [ETHE1_HUMAN]	23.62	3	4	4	5	0	5.35943e+06		0			12.0048	23.62	4	5	254	27.8551	6.82959
P09488	Glutathione S-transferase Mu 1 OS=Homo sapiens GN=GSTM1 PE=1 SV=3 - [GSTM1_HUMAN]	18.81	8	2	4	5	0	4.70661e+06		0			7.33599	18.81	4	5	218	25.6951	6.69775
H0Y3A4	Ankyrin-3 (Fragment) OS=Homo sapiens GN=ANK3 PE=1 SV=1 - [H0Y3A4_HUMAN]	15.25	9	1	5	5	0	1.40524e+06		0			5.58841	15.25	5	5	459	50.6732	5.09717
A0A0G2JP44	Cadherin-related family member 5 OS=Homo sapiens GN=CDHR5 PE=1 SV=1 - [A0A0G2JP44_HUMAN]	14.59	3	5	5	5	0	1.90943e+06		0			11.1019	14.59	5	5	651	69.4981	4.84326
D6REE7	Rho-associated protein kinase 2 OS=Homo sapiens GN=ROCK2 PE=1 SV=1 - [D6REE7_HUMAN]	13.68	4	3	5	5	0	2.19159e+06		0			8.2273	13.68	5	5	446	50.695	5.26221
P08621	U1 small nuclear ribonucleoprotein 70 kDa OS=Homo sapiens GN=SNRNP70 PE=1 SV=2 - [RU17_HUMAN]	13.5	3	5	5	5	0	1.76843e+06		0			4.62026	13.5	5	5	437	51.5258	9.93506
P13866	Sodium/glucose cotransporter 1 OS=Homo sapiens GN=SLC5A1 PE=1 SV=1 - [SC5A1_HUMAN]	7.23	1	4	4	5	0	8.36984e+06		0			12.3656	7.23	4	5	664	73.4493	7.6792
O15244	Solute carrier family 22 member 2 OS=Homo sapiens GN=SLC22A2 PE=1 SV=2 - [S22A2_HUMAN]	6.13	2	3	3	5	0	4.02874e+06		0			4.44738	6.13	3	5	555	62.5395	8.36768
P26006	Integrin alpha-3 OS=Homo sapiens GN=ITGA3 PE=1 SV=5 - [ITA3_HUMAN]	5.9	2	5	5	5	0	4.07267e+06		0			11.9412	5.9	5	5	1051	116.538	6.771
Q5JRX3	Presequence protease, mitochondrial OS=Homo sapiens GN=PITRM1 PE=1 SV=3 - [PREP_HUMAN]	5.79	5	5	5	5	0	2.85264e+06		0			4.71205	5.79	5	5	1037	117.338	6.91748
A0A0U1RQV4	Rho-associated protein kinase 1 OS=Homo sapiens GN=ROCK1 PE=1 SV=1 - [A0A0U1RQV4_HUMAN]	3.69	2	2	4	5	0	1.89022e+06		0			8.1574	3.69	4	5	1137	132.987	5.35107
Q96CM8	Acyl-CoA synthetase family member 2, mitochondrial OS=Homo sapiens GN=ACSF2 PE=1 SV=2 - [ACSF2_HUMAN]	41.79	3	20	20	40	3.55937e+07	3.09079e+06	88.6585	41.79	20	36	8.16929	9.27	4	4	615	68.0808	7.54736
O43772	Mitochondrial carnitine/acylcarnitine carrier protein OS=Homo sapiens GN=SLC25A20 PE=1 SV=1 - [MCAT_HUMAN]	31.89	2	9	9	15	8.76937e+06	3.87703e+06	20.4176	31.89	9	11	4.66896	16.94	3	4	301	32.9221	9.40771
B1ALH6	Phytanoyl-CoA dioxygenase, peroxisomal OS=Homo sapiens GN=PHYH PE=1 SV=1 - [B1ALH6_HUMAN]	38.63	4	10	10	14	5.32251e+06	1.97053e+06	16.9286	34.89	9	10	4.88966	17.45	4	4	321	36.9415	8.22119
O43895	Xaa-Pro aminopeptidase 2 OS=Homo sapiens GN=XPNPEP2 PE=1 SV=3 - [XPP2_HUMAN]	20.77	2	10	10	13	6.4016e+06	1.38825e+06	16.5096	13.06	7	9	2.20346	9.5	4	4	674	75.5768	6.03662
Q709F0	Acyl-CoA dehydrogenase family member 11 OS=Homo sapiens GN=ACAD11 PE=1 SV=2 - [ACD11_HUMAN]	12.05	5	8	8	13	3.87199e+06	5.70866e+06	14	12.05	8	9	6.61657	4.74	4	4	780	87.2278	8.11865
Q13576	Ras GTPase-activating-like protein IQGAP2 OS=Homo sapiens GN=IQGAP2 PE=1 SV=4 - [IQGA2_HUMAN]	6.54	5	7	9	13	2.62215e+06	4.2158e+06	13.006	6.03	8	9	6.01299	2.67	4	4	1575	180.465	5.64307
C9JFR7	Cytochrome c (Fragment) OS=Homo sapiens GN=CYCS PE=1 SV=1 - [C9JFR7_HUMAN]	41.58	4	5	5	11	4.36576e+06	1.93688e+06	13.1835	27.72	4	7	6.63942	29.7	4	4	101	11.326	9.65674
F5H7F6	Microsomal glutathione S-transferase 1 (Fragment) OS=Homo sapiens GN=MGST1 PE=1 SV=1 - [F5H7F6_HUMAN]	40.26	5	5	5	11	5.32629e+06	6.3281e+06	13.155	40.26	4	7	8.6773	24.68	4	4	77	8.88048	8.79248
Q9UBR1	Beta-ureidopropionase OS=Homo sapiens GN=UPB1 PE=1 SV=1 - [BUP1_HUMAN]	30.73	3	8	8	11	2.836e+06	1.76072e+06	10.7839	19.53	6	7	6.10255	18.23	4	4	384	43.1386	6.53662
P45381	Aspartoacylase OS=Homo sapiens GN=ASPA PE=1 SV=1 - [ACY2_HUMAN]	35.14	3	8	8	10	3.05291e+06	2.3968e+06	12.9411	24.92	6	6	6.49322	19.81	4	4	313	35.7121	6.52197
Q5VWZ2	Lysophospholipase-like protein 1 OS=Homo sapiens GN=LYPLAL1 PE=1 SV=3 - [LYPL1_HUMAN]	32.91	1	6	6	10	4.51992e+06	4.15433e+06	13.7758	32.91	6	6	9.92474	15.61	3	4	237	26.2994	7.84033
P62333	26S protease regulatory subunit 10B OS=Homo sapiens GN=PSMC6 PE=1 SV=1 - [PRS10_HUMAN]	26.74	6	8	8	10	2.35389e+06	6.56809e+06	11.9121	19.79	6	6	9.51373	13.88	4	4	389	44.1451	7.48877
O00483	Cytochrome c oxidase subunit NDUFA4 OS=Homo sapiens GN=NDUFA4 PE=1 SV=1 - [NDUA4_HUMAN]	32.1	1	3	3	9	2.04683e+07	3.1768e+07	9.98502	32.1	3	5	9.15787	32.1	3	4	81	9.36391	9.37842
Q9BQ69	O-acetyl-ADP-ribose deacetylase MACROD1 OS=Homo sapiens GN=MACROD1 PE=1 SV=2 - [MACD1_HUMAN]	27.38	1	6	6	9	1.48555e+07	6.48561e+06	12.069	17.85	4	5	11.8161	20	4	4	325	35.4827	9.51025
E9PM69	26S protease regulatory subunit 6A OS=Homo sapiens GN=PSMC3 PE=1 SV=1 - [E9PM69_HUMAN]	21.66	7	6	6	9	1.32884e+06	2.23429e+06	9.35779	17.63	5	5	5.67649	13.35	4	4	397	44.2958	5.04639
P14920	D-amino-acid oxidase OS=Homo sapiens GN=DAO PE=1 SV=3 - [OXDA_HUMAN]	17	6	5	5	9	6.64386e+06	4.26505e+06	9.85381	17	5	5	11.7383	10.95	3	4	347	39.4491	6.84424
P54727	UV excision repair protein RAD23 homolog B OS=Homo sapiens GN=RAD23B PE=1 SV=1 - [RD23B_HUMAN]	15.89	2	4	4	9	1.05135e+06	6.91229e+06	7.22697	15.89	4	5	10.8049	15.89	4	4	409	43.1446	4.84326
P50570	Dynamin-2 OS=Homo sapiens GN=DNM2 PE=1 SV=2 - [DYN2_HUMAN]	14.71	12	9	9	9	1.63746e+06	982265	6.35529	8.51	5	5	6.63082	6.21	4	4	870	98.0032	7.44482
F8VQQ8	Ubiquitin-conjugating enzyme E2 N OS=Homo sapiens GN=UBE2N PE=1 SV=1 - [F8VQQ8_HUMAN]	41.57	5	4	4	8	3.93489e+06	9.89727e+06	8.20295	29.21	3	4	9.04624	32.58	3	4	89	10.0823	8.79248
K7EMH1	60S ribosomal protein L22 (Fragment) OS=Homo sapiens GN=RPL22 PE=1 SV=1 - [K7EMH1_HUMAN]	41.57	7	4	4	8	7.02992e+06	1.34092e+07	10.8961	28.09	3	4	11.7051	41.57	4	4	89	10.4155	9.65674
P55327	Tumor protein D52 OS=Homo sapiens GN=TPD52 PE=1 SV=2 - [TPD52_HUMAN]	25.45	4	4	4	8	2.7396e+06	5.01096e+06	10.8583	16.96	3	4	10.7183	25.45	4	4	224	24.3122	4.83057
O95169	NADH dehydrogenase [ubiquinone] 1 beta subcomplex subunit 8, mitochondrial OS=Homo sapiens GN=NDUFB8 PE=1 SV=1 - [NDUB8_HUMAN]	23.12	4	3	3	8	3.42816e+06	2.48768e+07	4.31178	23.12	3	4	10.8584	18.28	2	4	186	21.7514	6.80029
Q96HC4	PDZ and LIM domain protein 5 OS=Homo sapiens GN=PDLIM5 PE=1 SV=5 - [PDLI5_HUMAN]	22.48	6	8	8	8	2.32327e+06	4.69955e+06	7.47266	8.89	4	4	9.81958	13.59	4	4	596	63.9045	8.20654
P50914	60S ribosomal protein L14 OS=Homo sapiens GN=RPL14 PE=1 SV=4 - [RL14_HUMAN]	22.33	2	4	4	8	4.72166e+06	7.22954e+06	9.92118	16.74	3	4	11.5491	16.28	3	4	215	23.417	10.9312
O14732	Inositol monophosphatase 2 OS=Homo sapiens GN=IMPA2 PE=1 SV=1 - [IMPA2_HUMAN]	18.75	4	5	5	8	8.44355e+06	1.28103e+07	11.4563	18.75	4	4	10.2091	11.46	4	4	288	31.3011	6.60986
Q52LJ0	Protein FAM98B OS=Homo sapiens GN=FAM98B PE=1 SV=1 - [FA98B_HUMAN]	16.36	4	4	4	8	1.40833e+06	1.68221e+06	2.46835	12.42	3	4	4.76001	11.52	3	4	330	37.167	6.29053
Q9BXJ7	Protein amnionless OS=Homo sapiens GN=AMN PE=1 SV=2 - [AMNLS_HUMAN]	14.79	3	5	5	8	2.78536e+06	7.25543e+06	10.7973	11.48	3	4	10.5772	10.38	3	4	453	47.7243	6.16357
B3KWE1	Histidine--tRNA ligase, cytoplasmic OS=Homo sapiens GN=HARS PE=1 SV=1 - [B3KWE1_HUMAN]	10.68	8	5	5	8	1.33927e+06	3.73444e+06	4.06492	6.82	3	4	8.34218	8.18	4	4	440	49.5919	5.41455
P31639	Sodium/glucose cotransporter 2 OS=Homo sapiens GN=SLC5A2 PE=1 SV=1 - [SC5A2_HUMAN]	9.23	1	4	4	8	5.70002e+06	5.56213e+06	6.11664	9.23	4	4	9.13032	7.44	3	4	672	72.8485	7.47412
O14841	5-oxoprolinase OS=Homo sapiens GN=OPLAH PE=1 SV=3 - [OPLA_HUMAN]	6.52	2	5	5	8	800595	1.70081e+06	6.8406	5.28	4	4	8.16425	4.81	4	4	1288	137.371	6.58057
Q01813	ATP-dependent 6-phosphofructokinase, platelet type OS=Homo sapiens GN=PFKP PE=1 SV=2 - [PFKAP_HUMAN]	6.25	4	1	4	8	3.61927e+06	3.9509e+06	7.6839	4.72	3	4	7.34651	5.1	3	4	784	85.5415	7.54736
Q16864	V-type proton ATPase subunit F OS=Homo sapiens GN=ATP6V1F PE=1 SV=2 - [VATF_HUMAN]	62.18	1	4	4	7	2.43834e+06	5.98216e+06	8.61356	40.34	3	3	11.941	54.62	3	4	119	13.362	5.51611
O15511	Actin-related protein 2/3 complex subunit 5 OS=Homo sapiens GN=ARPC5 PE=1 SV=3 - [ARPC5_HUMAN]	43.71	2	4	4	7	5.05498e+06	1.22221e+07	7.9333	30.46	3	3	11.6127	43.71	4	4	151	16.3103	5.66846
C9J0K6	Sorcin OS=Homo sapiens GN=SRI PE=1 SV=1 - [C9J0K6_HUMAN]	39.35	3	5	5	7	3.19898e+06	5.46711e+06	4.03942	19.35	3	3	9.15527	31.61	4	4	155	17.5935	5.60498
K7EM56	40S ribosomal protein S15 OS=Homo sapiens GN=RPS15 PE=1 SV=2 - [K7EM56_HUMAN]	34.82	8	2	2	7	1.2881e+06	2.34874e+06	7.51327	10.71	1	3	7.36751	34.82	2	4	112	12.9821	10.8872
Q9NX14	NADH dehydrogenase [ubiquinone] 1 beta subcomplex subunit 11, mitochondrial OS=Homo sapiens GN=NDUFB11 PE=1 SV=1 - [NDUBB_HUMAN]	34.64	1	3	3	7	1.04362e+07	1.81876e+07	6.52852	22.22	2	3	6.71155	34.64	3	4	153	17.3057	5.22412
Q9HAV7	GrpE protein homolog 1, mitochondrial OS=Homo sapiens GN=GRPEL1 PE=1 SV=2 - [GRPE1_HUMAN]	34.1	1	5	5	7	4.51448e+06	5.86536e+06	7.43694	18.43	3	3	7.02219	25.81	4	4	217	24.2639	8.11865
O75396	Vesicle-trafficking protein SEC22b OS=Homo sapiens GN=SEC22B PE=1 SV=4 - [SC22B_HUMAN]	30.7	2	5	5	7	1.93401e+06	4.55202e+06	4.46697	14.88	3	3	11.4601	26.05	4	4	215	24.5775	6.91748
Q9UKK9	ADP-sugar pyrophosphatase OS=Homo sapiens GN=NUDT5 PE=1 SV=1 - [NUDT5_HUMAN]	30.14	6	5	5	7	1.75513e+06	2.84973e+06	3.39622	16.89	3	3	6.87057	23.29	4	4	219	24.3122	4.94482
P60866	40S ribosomal protein S20 OS=Homo sapiens GN=RPS20 PE=1 SV=1 - [RS20_HUMAN]	28.57	4	3	3	7	5.44675e+06	8.62139e+06	5.42541	28.57	3	3	11.6856	28.57	3	4	119	13.3643	9.93506
J3KN29	26S proteasome non-ATPase regulatory subunit 9 OS=Homo sapiens GN=PSMD9 PE=1 SV=1 - [J3KN29_HUMAN]	28.38	6	6	6	7	1.89906e+06	2.00342e+06	8.06777	13.51	3	3	11.317	18.92	4	4	222	24.5384	6.72705
Q9NRV9	Heme-binding protein 1 OS=Homo sapiens GN=HEBP1 PE=1 SV=1 - [HEBP1_HUMAN]	26.98	2	4	4	7	2.08932e+06	6.37806e+06	7.01178	19.05	3	3	10.8595	26.98	4	4	189	21.0835	5.79541
P60891	Ribose-phosphate pyrophosphokinase 1 OS=Homo sapiens GN=PRPS1 PE=1 SV=2 - [PRPS1_HUMAN]	19.5	7	3	5	7	451954	2.17582e+06	7.53757	9.75	3	3	11.4497	19.5	4	4	318	34.8119	6.97607
Q8N465	D-2-hydroxyglutarate dehydrogenase, mitochondrial OS=Homo sapiens GN=D2HGDH PE=1 SV=3 - [D2HDH_HUMAN]	17.08	8	5	5	7	3.2716e+06	2.71796e+06	7.67575	10.75	3	3	9.5814	11.32	4	4	521	56.3802	7.98682
Q95604	HLA class I histocompatibility antigen, Cw-17 alpha chain OS=Homo sapiens GN=HLA-C PE=1 SV=1 - [1C17_HUMAN]	16.13	11	1	4	7	3.77491e+06	1.77924e+07	4.47636	6.18	2	3	12.727	16.13	4	4	372	41.2126	6.80029
Q9NR28	Diablo homolog, mitochondrial OS=Homo sapiens GN=DIABLO PE=1 SV=1 - [DBLOH_HUMAN]	15.06	5	3	3	7	2.32079e+06	3.12292e+06	6.61224	10.46	2	3	4.82641	15.06	3	4	239	27.1137	5.89697
A0A182DWF2	Thioredoxin reductase 2, mitochondrial OS=Homo sapiens GN=TXNRD2 PE=1 SV=1 - [A0A182DWF2_HUMAN]	13.97	16	4	5	7	1.60191e+06	1.76597e+06	4.66781	7.29	3	3	9.04946	10.93	4	4	494	53.533	6.52197
Q9NQH7	Probable Xaa-Pro aminopeptidase 3 OS=Homo sapiens GN=XPNPEP3 PE=1 SV=1 - [XPP3_HUMAN]	13.21	1	3	4	7	8.86148e+06	5.8923e+06	4.15191	4.73	2	3	6.48696	9.86	3	4	507	56.9968	6.82959
C9J7L4	Solute carrier family 13 member 3 (Fragment) OS=Homo sapiens GN=SLC13A3 PE=1 SV=8 - [C9J7L4_HUMAN]	12.5	3	3	3	7	2.0212e+06	4.43023e+06	7.69212	7.84	2	3	11.0886	12.5	3	4	408	45.7328	7.72314
E9PGZ4	Phosphatidylinositide phosphatase SAC1 OS=Homo sapiens GN=SACM1L PE=1 SV=1 - [E9PGZ4_HUMAN]	11.36	4	5	5	7	603228	2.39963e+06	3.37615	5.99	3	3	6.86143	9.5	4	4	484	55.5359	7.1958
P05546	Heparin cofactor 2 OS=Homo sapiens GN=SERPIND1 PE=1 SV=3 - [HEP2_HUMAN]	10.82	1	6	6	7	750652	6.73939e+06	0	5.81	3	3	9.26984	6.81	4	4	499	57.0342	6.90283
Q07837	Neutral and basic amino acid transport protein rBAT OS=Homo sapiens GN=SLC3A1 PE=1 SV=2 - [SLC31_HUMAN]	10.07	4	5	5	7	1.17707e+06	951202	6.18612	4.53	3	3	4.95419	8.47	4	4	685	78.8018	5.96045
P47897	Glutamine--tRNA ligase OS=Homo sapiens GN=QARS PE=1 SV=1 - [SYQ_HUMAN]	9.81	14	6	6	7	1.14466e+06	2.6851e+06	6.7926	4.26	3	3	6.78355	7.35	4	4	775	87.7429	7.15186
Q9Y285	Phenylalanine--tRNA ligase alpha subunit OS=Homo sapiens GN=FARSA PE=1 SV=3 - [SYFA_HUMAN]	9.65	6	3	3	7	168016	1.38169e+06	0	4.92	2	3	7.31843	9.65	3	4	508	57.5275	7.79639
O43747	AP-1 complex subunit gamma-1 OS=Homo sapiens GN=AP1G1 PE=1 SV=5 - [AP1G1_HUMAN]	9.49	7	6	6	7	1.32758e+06	2.55679e+06	1.7872	3.16	3	3	5.67281	7.42	4	4	822	91.2931	6.80029
P31942	Heterogeneous nuclear ribonucleoprotein H3 OS=Homo sapiens GN=HNRNPH3 PE=1 SV=2 - [HNRH3_HUMAN]	9.25	5	3	3	7	3.0607e+06	2.12538e+06	5.16155	9.25	3	3	6.66372	9.25	3	4	346	36.9031	6.87354
Q8IZ83	Aldehyde dehydrogenase family 16 member A1 OS=Homo sapiens GN=ALDH16A1 PE=1 SV=2 - [A16A1_HUMAN]	8.85	2	5	5	7	1.79859e+06	2.31228e+06	2.49641	3.12	2	3	8.73646	7.11	4	4	802	85.0737	6.78564
G3XAM2	Complement factor I OS=Homo sapiens GN=CFI PE=1 SV=1 - [G3XAM2_HUMAN]	8.16	5	4	4	7	1.13337e+06	4.96818e+06	5.01723	6.6	3	3	8.21112	5.56	3	4	576	65.0163	7.50342
P27487	Dipeptidyl peptidase 4 OS=Homo sapiens GN=DPP4 PE=1 SV=2 - [DPP4_HUMAN]	5.87	1	4	4	7	2.48532e+06	2.48402e+06	4.35238	4.44	3	3	8.35115	4.57	3	4	766	88.2225	6.03662
A0A0A0MRM8	Unconventional myosin-VI OS=Homo sapiens GN=MYO6 PE=1 SV=1 - [A0A0A0MRM8_HUMAN]	5.67	4	5	5	7	1.0275e+06	1.74218e+06	3.89894	3.11	3	3	7.77227	5.03	4	4	1253	144.924	8.55811
H0YFA4	Cysteine-rich protein 2 (Fragment) OS=Homo sapiens GN=CRIP2 PE=1 SV=1 - [H0YFA4_HUMAN]	49.48	3	4	4	6	6.44937e+06	5.34888e+07	1.65452	25	2	2	13.1309	49.48	4	4	192	20.6971	8.93896
P42677	40S ribosomal protein S27 OS=Homo sapiens GN=RPS27 PE=1 SV=3 - [RS27_HUMAN]	40.48	3	1	3	6	3.97798e+06	1.22046e+07	3.96721	25	2	2	9.35476	40.48	3	4	84	9.45484	9.45166
C9JTY3	Protein TFG (Fragment) OS=Homo sapiens GN=TFG PE=1 SV=1 - [C9JTY3_HUMAN]	29.69	4	4	4	6	4.4493e+06	8.81966e+06	4.01746	21.88	2	2	9.13214	29.69	4	4	128	14.7498	5.36377
M0R0P7	60S ribosomal protein L18a OS=Homo sapiens GN=RPL18A PE=1 SV=1 - [M0R0P7_HUMAN]	27.74	5	4	4	6	2.19423e+06	6.00521e+06	2.26521	15.33	2	2	7.62437	27.74	4	4	137	16.1665	10.6675
H0YMF4	60S ribosomal protein L28 OS=Homo sapiens GN=RPL28 PE=1 SV=1 - [H0YMF4_HUMAN]	27.68	4	4	4	6	1.43461e+06	3.37799e+06	1.6669	19.64	2	2	11.2029	27.68	4	4	112	12.3826	11.6782
I3L297	Adapter molecule crk OS=Homo sapiens GN=CRK PE=1 SV=1 - [I3L297_HUMAN]	27.35	2	4	4	6	1.0512e+06	4.04771e+06	2.56631	14.8	2	2	7.33081	27.35	4	4	223	25.4878	7.56201
Q6P1X6	UPF0598 protein C8orf82 OS=Homo sapiens GN=C8orf82 PE=1 SV=2 - [CH082_HUMAN]	26.85	2	4	4	6	4.85297e+06	6.7797e+06	0	4.17	1	2	9.03914	26.85	4	4	216	23.8741	9.14404
Q5HYI5	Putative uncharacterized protein DKFZp313C1541 OS=Homo sapiens GN=DKFZp313C1541 PE=1 SV=1 - [Q5HYI5_HUMAN]	26.32	4	1	4	6	776754	3.7259e+06	2.17907	14.35	2	2	10.4921	19.62	3	4	209	23.4049	7.50342
P36980	Complement factor H-related protein 2 OS=Homo sapiens GN=CFHR2 PE=1 SV=1 - [FHR2_HUMAN]	26.3	2	1	4	6	1.9563e+06	8.55218e+06	2.66127	9.63	2	2	11.0639	26.3	4	4	270	30.6306	6.37939
P62851	40S ribosomal protein S25 OS=Homo sapiens GN=RPS25 PE=1 SV=1 - [RS25_HUMAN]	24	1	3	3	6	6.02442e+06	1.56676e+07	3.72169	8	1	2	9.09017	24	3	4	125	13.7337	10.1108
P46783	40S ribosomal protein S10 OS=Homo sapiens GN=RPS10 PE=1 SV=1 - [RS10_HUMAN]	23.03	4	3	3	6	1.74968e+06	1.10755e+07	5.61433	13.94	2	2	7.6193	14.55	2	4	165	18.8859	10.1548
Q9H0E2	Toll-interacting protein OS=Homo sapiens GN=TOLLIP PE=1 SV=1 - [TOLIP_HUMAN]	21.9	6	4	4	6	2.33871e+06	5.22764e+06	0	8.76	2	2	11.6653	21.9	4	4	274	30.2622	5.97314
Q969X5	Endoplasmic reticulum-Golgi intermediate compartment protein 1 OS=Homo sapiens GN=ERGIC1 PE=1 SV=1 - [ERGI1_HUMAN]	19.66	1	4	4	6	2.13636e+06	2.35035e+06	4.22596	7.93	2	2	9.16851	19.66	4	4	290	32.5715	7.06396
O00303	Eukaryotic translation initiation factor 3 subunit F OS=Homo sapiens GN=EIF3F PE=1 SV=1 - [EIF3F_HUMAN]	18.77	4	5	5	6	1.15416e+06	2.83355e+06	3.5477	6.44	2	2	8.40996	15.41	4	4	357	37.5402	5.45264
P22748	Carbonic anhydrase 4 OS=Homo sapiens GN=CA4 PE=1 SV=2 - [CAH4_HUMAN]	15.06	4	4	4	6	1.70068e+06	5.31356e+06	4.07283	8.97	2	2	8.39433	15.06	4	4	312	35.0099	7.82568
G5E972	Lamina-associated polypeptide 2, isoforms beta/gamma OS=Homo sapiens GN=TMPO PE=1 SV=1 - [G5E972_HUMAN]	14.73	4	4	4	6	1.4041e+06	2.07849e+06	2.58358	7	2	2	6.3206	14.73	4	4	414	46.2782	9.02686
E9PKZ0	60S ribosomal protein L8 (Fragment) OS=Homo sapiens GN=RPL8 PE=1 SV=1 - [E9PKZ0_HUMAN]	14.63	5	3	3	6	6.64124e+06	4.36016e+06	5.56601	5.37	1	2	7.89469	14.63	3	4	205	22.3752	10.7554
P11413	Glucose-6-phosphate 1-dehydrogenase OS=Homo sapiens GN=G6PD PE=1 SV=4 - [G6PD_HUMAN]	14.56	4	5	5	6	533810	3.08731e+06	1.83114	5.24	2	2	9.43051	11.46	4	4	515	59.219	6.84424
Q9NYQ3	Hydroxyacid oxidase 2 OS=Homo sapiens GN=HAO2 PE=1 SV=1 - [HAOX2_HUMAN]	14.25	2	4	4	6	1.8968e+06	3.90805e+06	5.56052	7.12	2	2	10.9333	14.25	4	4	351	38.8143	7.63525
P00390	Glutathione reductase, mitochondrial OS=Homo sapiens GN=GSR PE=1 SV=2 - [GSHR_HUMAN]	13.98	3	5	5	6	2.95989e+06	1.44141e+06	2.3458	6.13	2	2	8.21517	11.88	4	4	522	56.221	8.49951
F8VS81	Twinfilin-1 (Fragment) OS=Homo sapiens GN=TWF1 PE=1 SV=1 - [F8VS81_HUMAN]	13.75	2	3	3	6	395614	2.5667e+06	2.27379	7.22	2	2	9.08651	13.75	3	4	291	33.387	6.45557
P06280	Alpha-galactosidase A OS=Homo sapiens GN=GLA PE=1 SV=1 - [AGAL_HUMAN]	13.29	2	4	4	6	717213	1.69351e+06	1.7788	5.13	2	2	4.28892	13.29	4	4	429	48.7349	5.60498
P16403	Histone H1.2 OS=Homo sapiens GN=HIST1H1C PE=1 SV=2 - [H12_HUMAN]	12.68	5	3	3	6	1.90255e+06	6.40403e+06	4.77948	7.04	2	2	10.8487	12.68	3	4	213	21.3517	10.9312
P27694	Replication protein A 70 kDa DNA-binding subunit OS=Homo sapiens GN=RPA1 PE=1 SV=2 - [RFA1_HUMAN]	10.39	3	4	4	6	788183	1.82764e+06	2.00995	3.73	2	2	9.11516	10.39	4	4	616	68.0953	7.21045
Q9NVH1	DnaJ homolog subfamily C member 11 OS=Homo sapiens GN=DNAJC11 PE=1 SV=2 - [DJC11_HUMAN]	9.3	3	3	3	6	499907	4.64081e+06	0	3.22	1	2	7.54365	9.3	3	4	559	63.2387	8.39697
Q13724	Mannosyl-oligosaccharide glucosidase OS=Homo sapiens GN=MOGS PE=1 SV=5 - [MOGS_HUMAN]	8.12	2	4	4	6	0	1.32939e+06	3.40144	2.87	2	2	7.01455	8.12	4	4	837	91.8606	8.89502
P05362	Intercellular adhesion molecule 1 OS=Homo sapiens GN=ICAM1 PE=1 SV=2 - [ICAM1_HUMAN]	7.52	3	3	3	6	800882	4.54324e+06	1.62604	4.51	2	2	7.10259	7.52	3	4	532	57.789	7.98682
A0A087WYF6	WASH complex subunit 2A OS=Homo sapiens GN=WASHC2A PE=1 SV=1 - [A0A087WYF6_HUMAN]	5.94	11	5	5	6	623788	1.03837e+06	3.26447	2.41	2	2	9.57737	4.5	4	4	1245	136.488	4.75439
Q08170	Serine/arginine-rich splicing factor 4 OS=Homo sapiens GN=SRSF4 PE=1 SV=2 - [SRSF4_HUMAN]	5.87	5	1	3	6	8.23353e+06	6.05371e+06	3.88269	1.82	1	2	8.30396	5.87	3	4	494	56.6453	11.5171
A0A087X2D8	C-Jun-amino-terminal kinase-interacting protein 4 OS=Homo sapiens GN=SPAG9 PE=1 SV=1 - [A0A087X2D8_HUMAN]	5.34	2	5	5	6	607467	556505	4.2433	1.52	2	2	1.93329	3.81	3	4	1312	145.08	5.17334
Q8N0W3	L-fucose kinase OS=Homo sapiens GN=FUK PE=2 SV=2 - [FUK_HUMAN]	5.26	6	4	4	6	296786	876793	2.77922	2.58	2	2	6.38074	5.26	4	4	1084	117.548	6.25244
H0Y390	Microtubule-actin cross-linking factor 1, isoforms 1/2/3/5 (Fragment) OS=Homo sapiens GN=MACF1 PE=1 SV=1 - [H0Y390_HUMAN]	1.29	5	5	5	6	1.37174e+07	481508	3.54929	0.43	2	2	6.07987	1.11	4	4	4434	505.44	5.32568
A0A0C4DGY8	Enolase-phosphatase E1 OS=Homo sapiens GN=ENOPH1 PE=1 SV=1 - [A0A0C4DGY8_HUMAN]	44.97	3	4	4	5	921406	3.51194e+06	2.1062	8.72	1	1	8.42057	44.97	4	4	149	16.5223	6.37939
I3L2X8	Phosphatidylinositol transfer protein alpha isoform (Fragment) OS=Homo sapiens GN=PITPNA PE=1 SV=2 - [I3L2X8_HUMAN]	40.96	14	3	3	5	758790	1.8906e+06	2.3206	15.66	1	1	5.40007	40.96	3	4	83	9.73889	5.74463
Q71UM5	40S ribosomal protein S27-like OS=Homo sapiens GN=RPS27L PE=1 SV=3 - [RS27L_HUMAN]	40.48	4	1	3	5	6.49588e+06	9.09197e+06	1.77733	9.52	1	1	9.4424	40.48	3	4	84	9.47087	9.45166
K7ERI9	Apolipoprotein C-I (Fragment) OS=Homo sapiens GN=APOC1 PE=1 SV=1 - [K7ERI9_HUMAN]	37.66	6	4	4	5	0	2.42477e+06	1.64064	11.69	1	1	9.44671	37.66	4	4	77	8.64167	6.7124
A0A087WZX2	NADH dehydrogenase [ubiquinone] 1 beta subcomplex subunit 6 OS=Homo sapiens GN=NDUFB6 PE=1 SV=1 - [A0A087WZX2_HUMAN]	36.08	2	2	2	5	0	8.28949e+06	0	25.77	1	1	9.70017	36.08	2	4	97	11.7081	9.48096
P57105	Synaptojanin-2-binding protein OS=Homo sapiens GN=SYNJ2BP PE=1 SV=2 - [SYJ2B_HUMAN]	33.79	4	4	4	5	1.66945e+06	3.64453e+06	2.22679	6.21	1	1	12.9458	33.79	4	4	145	15.9182	6.30322
Q969E4	Transcription elongation factor A protein-like 3 OS=Homo sapiens GN=TCEAL3 PE=1 SV=1 - [TCAL3_HUMAN]	30.5	3	3	3	5	949736	1.84029e+06	0	8	1	1	5.7822	30.5	3	4	200	22.4886	4.91943
O43676	NADH dehydrogenase [ubiquinone] 1 beta subcomplex subunit 3 OS=Homo sapiens GN=NDUFB3 PE=1 SV=3 - [NDUB3_HUMAN]	29.59	2	4	4	5	5.16878e+06	1.18758e+07	2.11391	11.22	1	1	7.27701	29.59	4	4	98	11.3947	9.20264
P51970	NADH dehydrogenase [ubiquinone] 1 alpha subcomplex subunit 8 OS=Homo sapiens GN=NDUFA8 PE=1 SV=3 - [NDUA8_HUMAN]	29.07	1	4	4	5	718649	2.67398e+06	2.52744	7.56	1	1	1.91641	29.07	3	4	172	20.0921	7.6499
F8VXJ7	Protein canopy homolog 2 (Fragment) OS=Homo sapiens GN=CNPY2 PE=1 SV=1 - [F8VXJ7_HUMAN]	28.57	7	3	3	5	3.72788e+06	5.97119e+06	0	9.52	1	1	9.49188	28.57	3	4	168	19.0405	4.93213
A0A087WYF7	MICOS complex subunit OS=Homo sapiens GN=APOOL PE=1 SV=1 - [A0A087WYF7_HUMAN]	26.12	3	4	4	5	289632	1.98045e+06	1.90256	5.97	1	1	3.52215	26.12	4	4	268	29.1862	9.45166
P62280	40S ribosomal protein S11 OS=Homo sapiens GN=RPS11 PE=1 SV=3 - [RS11_HUMAN]	25.95	4	3	3	5	2.6269e+06	8.61532e+06	3.25417	11.39	1	1	11.8671	25.95	3	4	158	18.419	10.3013
O00487	26S proteasome non-ATPase regulatory subunit 14 OS=Homo sapiens GN=PSMD14 PE=1 SV=1 - [PSDE_HUMAN]	25.81	2	4	4	5	3.19447e+06	4.0945e+06	2.3778	4.19	1	1	10.5165	25.81	4	4	310	34.5546	6.52197
E7EVH9	Pseudouridine-5'-phosphatase (Fragment) OS=Homo sapiens GN=PUDP PE=1 SV=1 - [E7EVH9_HUMAN]	22.51	2	3	3	5	1.35852e+06	2.26341e+06	2.16815	5.24	1	1	9.26026	22.51	3	4	191	21.4521	7.50342
A0A087WU14	Secretory carrier-associated membrane protein (Fragment) OS=Homo sapiens GN=SCAMP1 PE=1 SV=1 - [A0A087WU14_HUMAN]	22.33	3	3	3	5	250217	1.74174e+06	0	11.17	1	1	8.64198	22.33	3	4	206	23.0065	8.57275
Q8IW45	ATP-dependent (S)-NAD(P)H-hydrate dehydratase OS=Homo sapiens GN=NAXD PE=1 SV=1 - [NNRD_HUMAN]	21.9	1	4	4	5	1.26525e+06	3.40322e+06	2.63918	3.75	1	1	7.73502	21.9	4	4	347	36.5532	8.06006
Q5T440	Putative transferase CAF17, mitochondrial OS=Homo sapiens GN=IBA57 PE=1 SV=1 - [CAF17_HUMAN]	19.38	1	4	4	5	1.38941e+06	4.55299e+06	1.73532	2.81	1	1	11.1763	16.57	3	4	356	38.1311	9.83252
B4DLR8	NAD(P)H dehydrogenase [quinone] 1 OS=Homo sapiens GN=NQO1 PE=1 SV=1 - [B4DLR8_HUMAN]	19.31	4	3	3	5	3.23892e+06	1.1255e+07	0	8.91	1	1	11.1072	19.31	3	4	202	22.7789	8.49951
P98179	RNA-binding protein 3 OS=Homo sapiens GN=RBM3 PE=1 SV=1 - [RBM3_HUMAN]	17.83	1	2	2	5	916994	7.01562e+06	1.68575	6.37	1	1	5.27094	17.83	2	4	157	17.16	8.90967
H0Y512	Adipocyte plasma membrane-associated protein (Fragment) OS=Homo sapiens GN=APMAP PE=1 SV=1 - [H0Y512_HUMAN]	15.65	2	4	4	5	563826	6.37157e+06	1.89374	2.2	1	1	10.0271	13.45	3	4	409	45.3761	5.65576
Q12765	Secernin-1 OS=Homo sapiens GN=SCRN1 PE=1 SV=2 - [SCRN1_HUMAN]	15.46	4	5	5	5	615218	4.29528e+06	1.92585	2.66	1	1	7.02524	12.8	4	4	414	46.3525	4.75439
Q9UNS2	COP9 signalosome complex subunit 3 OS=Homo sapiens GN=COPS3 PE=1 SV=3 - [CSN3_HUMAN]	14.42	2	4	4	5	709474	2.64043e+06	0	3.55	1	1	6.19796	10.87	3	4	423	47.842	6.65381
J3KQ45	Trans-Golgi network integral membrane protein 2 OS=Homo sapiens GN=TGOLN2 PE=1 SV=1 - [J3KQ45_HUMAN]	12.78	3	4	4	5	0	700907	2.48073	4.19	1	1	5.12854	12.78	4	4	454	47.8517	5.84619
P17050	Alpha-N-acetylgalactosaminidase OS=Homo sapiens GN=NAGA PE=1 SV=2 - [NAGAB_HUMAN]	12.65	1	4	4	5	3.06942e+06	6.27132e+06	1.93132	2.68	1	1	12.0769	12.65	4	4	411	46.5339	5.18604
Q15833	Syntaxin-binding protein 2 OS=Homo sapiens GN=STXBP2 PE=1 SV=2 - [STXB2_HUMAN]	11.97	6	4	4	5	151455	863543	3.87682	3.04	1	1	9.74821	11.97	4	4	593	66.4105	6.55127
P03952	Plasma kallikrein OS=Homo sapiens GN=KLKB1 PE=1 SV=1 - [KLKB1_HUMAN]	11.44	3	5	5	5	413983	2.42737e+06	0	2.04	1	1	3.71448	9.4	4	4	638	71.3228	8.22119
Q13153	Serine/threonine-protein kinase PAK 1 OS=Homo sapiens GN=PAK1 PE=1 SV=2 - [PAK1_HUMAN]	10.83	8	1	4	5	2.44034e+06	3.70203e+06	1.98423	1.65	1	1	5.6408	10.83	4	4	545	60.6087	5.75732
Q12797	Aspartyl/asparaginyl beta-hydroxylase OS=Homo sapiens GN=ASPH PE=1 SV=3 - [ASPH_HUMAN]	10.82	4	5	5	5	772762	1.24082e+06	0	1.19	1	1	4.80723	9.63	4	4	758	85.8095	5.0083
Q8N2G8	GH3 domain-containing protein OS=Homo sapiens GN=GHDC PE=1 SV=2 - [GHDC_HUMAN]	9.81	2	4	4	5	367798	1.87432e+06	1.62448	2.83	1	1	6.55919	9.81	4	4	530	57.4873	7.88428
Q99538	Legumain OS=Homo sapiens GN=LGMN PE=1 SV=1 - [LGMN_HUMAN]	9.01	6	3	3	5	436583	4.02518e+06	0	1.85	1	1	5.21865	9.01	3	4	433	49.3794	6.55127
E7EWP0	NADH dehydrogenase [ubiquinone] 1 beta subcomplex subunit 5, mitochondrial OS=Homo sapiens GN=NDUFB5 PE=1 SV=1 - [E7EWP0_HUMAN]	8.47	3	2	2	5	0	2.66658e+06	3.36821	8.47	1	1	10.0544	8.47	2	4	177	20.0255	7.66455
P43686	26S protease regulatory subunit 6B OS=Homo sapiens GN=PSMC4 PE=1 SV=2 - [PRS6B_HUMAN]	8.37	1	4	4	5	502356	1.23278e+06	2.58014	4.55	1	1	11.9971	8.37	4	4	418	47.3365	5.21143
P04066	Tissue alpha-L-fucosidase OS=Homo sapiens GN=FUCA1 PE=1 SV=4 - [FUCO_HUMAN]	7.51	1	4	4	5	711658	2.13325e+06	1.84396	2.36	1	1	4.71113	7.51	4	4	466	53.6547	6.84424
P35637	RNA-binding protein FUS OS=Homo sapiens GN=FUS PE=1 SV=1 - [FUS_HUMAN]	7.41	2	3	4	5	254455	6.07329e+06	3.27429	3.23	1	1	11.2287	7.41	4	4	526	53.3938	9.36377
P43304	Glycerol-3-phosphate dehydrogenase, mitochondrial OS=Homo sapiens GN=GPD2 PE=1 SV=3 - [GPDM_HUMAN]	6.6	2	5	5	5	348760	1.30652e+06	1.61363	1.65	1	1	5.99921	4.95	4	4	727	80.8016	7.69385
F5H6E2	Unconventional myosin-Ic OS=Homo sapiens GN=MYO1C PE=1 SV=1 - [F5H6E2_HUMAN]	5.58	8	5	5	5	1.17127e+06	1.32662e+06	2.38886	0.87	1	1	4.33072	4.72	4	4	1039	118.92	9.40771
Q92973	Transportin-1 OS=Homo sapiens GN=TNPO1 PE=1 SV=2 - [TNPO1_HUMAN]	5.35	2	3	3	5	1.03963e+06	2.24928e+06	0	1.22	1	1	3.84625	5.35	3	4	898	102.289	4.98291
P13671	Complement component C6 OS=Homo sapiens GN=C6 PE=1 SV=3 - [CO6_HUMAN]	4.6	1	3	3	5	1.34842e+06	1.63312e+06	1.61381	1.5	1	1	4.38086	4.6	3	4	934	104.718	6.75635
A0PJK1	Sodium/glucose cotransporter 5 OS=Homo sapiens GN=SLC5A10 PE=1 SV=2 - [SC5AA_HUMAN]	4.19	1	2	2	5	978536	1.03159e+07	0	2.52	1	1	10.0139	4.19	2	4	596	64.3005	7.60596
P11047	Laminin subunit gamma-1 OS=Homo sapiens GN=LAMC1 PE=1 SV=3 - [LAMC1_HUMAN]	4.16	2	5	5	5	273247	570947	0	0.87	1	1	6.22122	3.29	4	4	1609	177.489	5.12256
Q5T321	Neurobeachin OS=Homo sapiens GN=NBEA PE=1 SV=1 - [Q5T321_HUMAN]	2	4	1	4	5	0	1.91574e+06	3.11107	0.85	1	1	5.61551	1.16	3	4	2943	327.342	6.16357
O75531	Barrier-to-autointegration factor OS=Homo sapiens GN=BANF1 PE=1 SV=1 - [BAF_HUMAN]	61.8	1	4	4	4	0	1.19302e+07					7.74221	61.8	4	4	89	10.052	6.0874
P01619	Immunoglobulin kappa variable 3-20 OS=Homo sapiens GN=IGKV3-20 PE=1 SV=2 - [KV320_HUMAN]	46.55	2	4	4	4	0	7.20587e+06		0			12.0095	46.55	4	4	116	12.5493	4.95752
Q9HB71	Calcyclin-binding protein OS=Homo sapiens GN=CACYBP PE=1 SV=2 - [CYBP_HUMAN]	27.19	1	4	4	4	0	2.20393e+06		0			4.54874	27.19	4	4	228	26.1936	8.25049
Q13126	S-methyl-5'-thioadenosine phosphorylase OS=Homo sapiens GN=MTAP PE=1 SV=2 - [MTAP_HUMAN]	26.5	5	4	4	4	0	2.88953e+06		0			8.68811	26.5	4	4	283	31.2158	7.18115
Q9UFN0	Protein NipSnap homolog 3A OS=Homo sapiens GN=NIPSNAP3A PE=1 SV=2 - [NPS3A_HUMAN]	25.91	1	4	4	4	0	5.4797e+06		0			7.6618	25.91	4	4	247	28.4485	9.15869
H0YEB7	N-acetyl-D-glucosamine kinase (Fragment) OS=Homo sapiens GN=NAGK PE=1 SV=1 - [H0YEB7_HUMAN]	25.27	9	3	3	4	0	3.5004e+06		0			8.35087	25.27	3	4	182	19.4916	4.83057
E9PMG2	Palmitoyl-protein thioesterase 1 (Fragment) OS=Homo sapiens GN=PPT1 PE=1 SV=1 - [E9PMG2_HUMAN]	21.4	6	4	4	4	0	3.45735e+06		0			7.39588	21.4	4	4	271	29.722	7.6499
H0YD13	CD44 antigen OS=Homo sapiens GN=CD44 PE=1 SV=2 - [H0YD13_HUMAN]	19.9	12	4	4	4	0	3.06704e+06		0			9.56617	19.9	4	4	206	22.6686	8.19189
Q7L266	Isoaspartyl peptidase/L-asparaginase OS=Homo sapiens GN=ASRGL1 PE=1 SV=2 - [ASGL1_HUMAN]	18.18	4	3	3	4	0	1.07618e+07		0			9.5127	18.18	3	4	308	32.0342	6.23975
Q8N474	Secreted frizzled-related protein 1 OS=Homo sapiens GN=SFRP1 PE=1 SV=1 - [SFRP1_HUMAN]	18.15	2	4	4	4	0	5.81065e+06		0			10.402	18.15	4	4	314	35.3621	8.85107
Q9H1E3	Nuclear ubiquitous casein and cyclin-dependent kinase substrate 1 OS=Homo sapiens GN=NUCKS1 PE=1 SV=1 - [NUCKS_HUMAN]	17.28	1	3	3	4	0	3.69207e+06		0			6.21629	17.28	3	4	243	27.28	5.08447
Q9Y3F4	Serine-threonine kinase receptor-associated protein OS=Homo sapiens GN=STRAP PE=1 SV=1 - [STRAP_HUMAN]	16.86	2	4	4	4	0	2.2431e+06		0			7.31351	16.86	4	4	350	38.414	5.12256
O43765	Small glutamine-rich tetratricopeptide repeat-containing protein alpha OS=Homo sapiens GN=SGTA PE=1 SV=1 - [SGTA_HUMAN]	15.97	2	4	4	4	0	2.73764e+06		0			8.89176	15.97	4	4	313	34.0417	4.86865
P13284	Gamma-interferon-inducible lysosomal thiol reductase OS=Homo sapiens GN=IFI30 PE=1 SV=3 - [GILT_HUMAN]	14.8	1	2	2	4	0	3.84389e+06		0			8.95413	14.8	2	4	250	27.945	4.88135
Q9BTV4	Transmembrane protein 43 OS=Homo sapiens GN=TMEM43 PE=1 SV=1 - [TMM43_HUMAN]	14.75	1	4	4	4	0	2.63825e+06		0			7.19628	14.75	4	4	400	44.8472	8.1333
E9PMB9	Malic enzyme (Fragment) OS=Homo sapiens GN=ME3 PE=1 SV=8 - [E9PMB9_HUMAN]	14.66	3	3	4	4	0	2.66901e+06		0			10.9902	14.66	4	4	580	64.2364	8.33838
Q15124	Phosphoglucomutase-like protein 5 OS=Homo sapiens GN=PGM5 PE=1 SV=2 - [PGM5_HUMAN]	14.29	1	4	4	4	0	5.66474e+06		0			5.87319	14.29	4	4	567	62.1857	7.21045
Q15293	Reticulocalbin-1 OS=Homo sapiens GN=RCN1 PE=1 SV=1 - [RCN1_HUMAN]	14.2	1	4	4	4	0	8.38925e+06					4.16297	14.2	4	4	331	38.8662	4.99561
O60547	GDP-mannose 4,6 dehydratase OS=Homo sapiens GN=GMDS PE=1 SV=1 - [GMDS_HUMAN]	13.44	1	4	4	4	0	3.56065e+06		0			10.4182	13.44	4	4	372	41.9233	7.31299
O95674	Phosphatidate cytidylyltransferase 2 OS=Homo sapiens GN=CDS2 PE=1 SV=1 - [CDS2_HUMAN]	11.24	1	3	3	4	0	2.58464e+06		0			3.47548	11.24	3	4	445	51.3841	7.09326
O94919	Endonuclease domain-containing 1 protein OS=Homo sapiens GN=ENDOD1 PE=1 SV=2 - [ENDD1_HUMAN]	10.8	1	4	4	4	0	5.4579e+06		0			8.80706	10.8	4	4	500	54.9813	5.70654
P12532	Creatine kinase U-type, mitochondrial OS=Homo sapiens GN=CKMT1A PE=1 SV=1 - [KCRU_HUMAN]	10.79	8	2	4	4	0	3.32249e+06		0			7.32635	10.79	4	4	417	47.0072	8.33838
Q8TAT6	Nuclear protein localization protein 4 homolog OS=Homo sapiens GN=NPLOC4 PE=1 SV=3 - [NPL4_HUMAN]	10.69	3	4	4	4	0	1.94064e+06		0			8.69454	10.69	4	4	608	68.0769	6.37939
E9PCT5	Caveolin OS=Homo sapiens GN=CAV1 PE=1 SV=1 - [E9PCT5_HUMAN]	10.18	3	2	2	4	0	3.20907e+06		0			6.6963	10.18	2	4	167	19.1648	5.79541
Q969V3	Nicalin OS=Homo sapiens GN=NCLN PE=1 SV=2 - [NCLN_HUMAN]	9.59	6	4	4	4	0	915422		0			6.25685	9.59	4	4	563	62.9346	6.88818
Q96TA1	Niban-like protein 1 OS=Homo sapiens GN=FAM129B PE=1 SV=3 - [NIBL1_HUMAN]	8.58	1	4	4	4	0	3.24302e+06		0			8.21941	8.58	4	4	746	84.0847	6.18896
P22413	Ectonucleotide pyrophosphatase/phosphodiesterase family member 1 OS=Homo sapiens GN=ENPP1 PE=1 SV=2 - [ENPP1_HUMAN]	7.14	2	4	4	4	0	1.39847e+06		0			10.8472	7.14	4	4	925	104.857	7.13721
Q9HBG4	V-type proton ATPase 116 kDa subunit a isoform 4 OS=Homo sapiens GN=ATP6V0A4 PE=1 SV=2 - [VPP4_HUMAN]	7.14	1	4	4	4	0	1.04513e+06		0			7.18751	7.14	4	4	840	96.323	6.1001
Q9Y3Z3	Deoxynucleoside triphosphate triphosphohydrolase SAMHD1 OS=Homo sapiens GN=SAMHD1 PE=1 SV=2 - [SAMH1_HUMAN]	4.79	1	3	3	4	0	2.69122e+06		0			8.14087	4.79	3	4	626	72.1548	7.13721
Q7L576	Cytoplasmic FMR1-interacting protein 1 OS=Homo sapiens GN=CYFIP1 PE=1 SV=1 - [CYFP1_HUMAN]	3.43	3	2	4	4	0	2.51564e+06		0			6.17186	3.43	4	4	1253	145.089	6.90283
Q9UBG0	C-type mannose receptor 2 OS=Homo sapiens GN=MRC2 PE=1 SV=2 - [MRC2_HUMAN]	3.11	1	4	4	4	0	1.57796e+06		0			6.82132	3.11	4	4	1479	166.568	5.8335
O75165	DnaJ homolog subfamily C member 13 OS=Homo sapiens GN=DNAJC13 PE=1 SV=5 - [DJC13_HUMAN]	2.5	1	4	4	4	0	735057		0			6.15452	2.5	4	4	2243	254.252	6.7417
P11498	Pyruvate carboxylase, mitochondrial OS=Homo sapiens GN=PC PE=1 SV=2 - [PYC_HUMAN]	57.72	3	49	49	88	2.7164e+07	2.54208e+06	197.644	54.5	48	85	1.98284	5.77	3	3	1178	129.551	6.84424
P04264	Keratin, type II cytoskeletal 1 OS=Homo sapiens GN=KRT1 PE=1 SV=6 - [K2C1_HUMAN]	53.57	2	26	30	61	6.38624e+07	3.3938e+06	153.97	53.57	30	58	9.0624	6.21	3	3	644	65.999	8.11865
	>sp|K1C9_HUMAN|	58.11	3	27	28	51	5.84238e+07	811350	134.695	58.11	28	48	3.93691	7.7	3	3	623	62.0919	5.30029
P13645	Keratin, type I cytoskeletal 10 OS=Homo sapiens GN=KRT10 PE=1 SV=6 - [K1C10_HUMAN]	29.62	18	11	15	28	2.22598e+07	2.71176e+06	57.7104	29.62	15	25	6.11428	5.99	3	3	584	58.7917	5.21143
P35908	Keratin, type II cytoskeletal 2 epidermal OS=Homo sapiens GN=KRT2 PE=1 SV=2 - [K22E_HUMAN]	34.43	10	10	16	23	3.90271e+07	5.64951e+06	35.9328	34.12	15	20	4.73854	4.69	3	3	639	65.3932	8.00146
P08779	Keratin, type I cytoskeletal 16 OS=Homo sapiens GN=KRT16 PE=1 SV=4 - [K1C16_HUMAN]	26.85	22	7	12	21	1.03474e+07	4.45015e+06	29.1316	26.85	12	18	6.3602	5.29	3	3	473	51.2362	5.04639
P07148	Fatty acid-binding protein, liver OS=Homo sapiens GN=FABP1 PE=1 SV=1 - [FABPL_HUMAN]	81.1	2	7	7	15	2.42164e+07	3.70382e+06	30.1039	81.1	7	12	6.24297	22.83	3	3	127	14.1994	7.18115
C9JZR2	Catenin delta-1 OS=Homo sapiens GN=CTNND1 PE=1 SV=2 - [C9JZR2_HUMAN]	14.07	4	10	10	12	1.36526e+06	2.45785e+06	16.2209	10.02	8	9	7.50485	5.33	3	3	938	104.784	6.87354
P51570	Galactokinase OS=Homo sapiens GN=GALK1 PE=1 SV=1 - [GALK1_HUMAN]	26.53	3	7	7	10	4.89054e+06	3.92546e+06	18.579	23.98	6	7	4.04479	13.52	3	3	392	42.2456	6.45557
Q9Y5L4	Mitochondrial import inner membrane translocase subunit Tim13 OS=Homo sapiens GN=TIMM13 PE=1 SV=1 - [TIM13_HUMAN]	50.53	2	5	5	9	4.18408e+06	6.26833e+06	14.1724	50.53	5	6	8.01273	41.05	3	3	95	10.493	8.17725
P0DP23	Calmodulin-1 OS=Homo sapiens GN=CALM1 PE=1 SV=1 - [CALM1_HUMAN]	26.85	11	2	3	9	6.78208e+06	3.38228e+06	14.0969	26.85	3	6	7.34515	26.85	3	3	149	16.8268	4.22119
Q8TC12	Retinol dehydrogenase 11 OS=Homo sapiens GN=RDH11 PE=1 SV=2 - [RDH11_HUMAN]	24.84	7	6	6	9	4.54243e+06	4.60509e+06	14.6296	21.07	5	6	4.77573	12.26	3	3	318	35.3634	8.82178
P05937	Calbindin OS=Homo sapiens GN=CALB1 PE=1 SV=2 - [CALB1_HUMAN]	22.22	5	5	5	9	8.21131e+06	2.14992e+06	11.8005	22.22	5	6	5.59904	13.03	3	3	261	30.006	4.83057
P45974	Ubiquitin carboxyl-terminal hydrolase 5 OS=Homo sapiens GN=USP5 PE=1 SV=2 - [UBP5_HUMAN]	9.32	4	7	7	9	1.9406e+06	934793	10.5988	8.16	6	6	3.76478	4.08	3	3	858	95.7253	5.03369
A0A087WXS7	ATPase ASNA1 OS=Homo sapiens GN=ASNA1 PE=1 SV=1 - [A0A087WXS7_HUMAN]	25.68	3	5	5	8	2.70536e+06	5.73006e+06	10.7197	12.69	3	5	9.08739	16.92	3	3	331	37.0947	5.13525
P04181	Ornithine aminotransferase, mitochondrial OS=Homo sapiens GN=OAT PE=1 SV=1 - [OAT_HUMAN]	14.35	1	6	6	8	2.19583e+06	2.26639e+06	8.1587	10.71	4	5	9.35488	6.83	3	3	439	48.5042	7.03467
Q8WW52	Protein FAM151A OS=Homo sapiens GN=FAM151A PE=2 SV=2 - [F151A_HUMAN]	9.74	1	4	4	8	2.87677e+06	1.53656e+06	8.73291	6.15	3	5	9.28314	8.03	3	3	585	63.9871	6.66846
Q92900	Regulator of nonsense transcripts 1 OS=Homo sapiens GN=UPF1 PE=1 SV=2 - [RENT1_HUMAN]	7.09	1	5	5	8	1.23331e+06	1.25912e+06	9.94249	7.09	5	5	8.6586	5.23	3	3	1129	124.267	6.60986
Q9NQX3	Gephyrin OS=Homo sapiens GN=GPHN PE=1 SV=1 - [GEPH_HUMAN]	6.11	4	4	4	8	2.29053e+06	3.04197e+06	5.88494	6.11	4	5	7.17252	4.89	3	3	736	79.698	5.42725
Q14353	Guanidinoacetate N-methyltransferase OS=Homo sapiens GN=GAMT PE=1 SV=1 - [GAMT_HUMAN]	36.02	2	5	5	7	2.31826e+06	1.226e+07	5.47616	27.12	4	4	4.80216	24.58	3	3	236	26.3011	6.13818
H0YKU1	Tropomodulin-3 (Fragment) OS=Homo sapiens GN=TMOD3 PE=1 SV=1 - [H0YKU1_HUMAN]	29.41	3	4	4	7	2.52389e+06	4.76627e+06	4.30257	29.41	4	4	8.7299	21.93	3	3	187	20.888	7.43018
H0YMB3	GMP reductase OS=Homo sapiens GN=GMPR2 PE=1 SV=1 - [H0YMB3_HUMAN]	21.27	13	4	5	7	2.0164e+06	8.03265e+06	3.81352	17.14	4	4	5.90424	14.29	3	3	315	33.9	6.91748
P21953	2-oxoisovalerate dehydrogenase subunit beta, mitochondrial OS=Homo sapiens GN=BCKDHB PE=1 SV=2 - [ODBB_HUMAN]	17.09	1	4	4	7	4.37097e+06	1.22986e+07	8.58236	11.48	3	4	10.026	13.78	3	3	392	43.0949	6.29053
P10644	cAMP-dependent protein kinase type I-alpha regulatory subunit OS=Homo sapiens GN=PRKAR1A PE=1 SV=1 - [KAP0_HUMAN]	15.22	3	4	4	7	1.08615e+06	1.55188e+06	6.70869	15.22	4	4	7.80997	10.5	3	3	381	42.955	5.35107
P54136	Arginine--tRNA ligase, cytoplasmic OS=Homo sapiens GN=RARS PE=1 SV=2 - [SYRC_HUMAN]	12.58	3	6	6	7	1.03554e+06	4.27689e+06	8.46158	6.67	4	4	7.9616	8.18	3	3	660	75.3309	6.68311
Q14677	Clathrin interactor 1 OS=Homo sapiens GN=CLINT1 PE=1 SV=1 - [EPN4_HUMAN]	12.32	2	5	5	7	1.51821e+06	2.2986e+06	7.11519	9.92	4	4	8.51847	7.36	3	3	625	68.2158	6.41748
P09496	Clathrin light chain A OS=Homo sapiens GN=CLTA PE=1 SV=1 - [CLCA_HUMAN]	10.89	3	4	4	7	3.82283e+06	6.50822e+06	8.02676	8.06	3	4	7.64501	9.68	3	3	248	27.06	4.51318
P02545	Prelamin-A/C OS=Homo sapiens GN=LMNA PE=1 SV=1 - [LMNA_HUMAN]	9.04	4	5	5	7	1.71651e+06	2.5726e+06	6.4322	6.93	4	4	7.95168	6.48	3	3	664	74.0947	7.02002
A0A087WW66	26S proteasome non-ATPase regulatory subunit 1 OS=Homo sapiens GN=PSMD1 PE=1 SV=1 - [A0A087WW66_HUMAN]	8.71	3	6	6	7	1.11426e+06	2.1881e+06	4.24153	4.93	4	4	4.28999	5.04	3	3	953	105.784	5.41455
Q9Y2V2	Calcium-regulated heat-stable protein 1 OS=Homo sapiens GN=CARHSP1 PE=1 SV=2 - [CHSP1_HUMAN]	42.86	5	3	3	6	2.3989e+06	5.59945e+06	5.6574	18.37	2	3	6.32128	35.37	2	3	147	15.882	8.20654
H3BNT7	26S proteasome non-ATPase regulatory subunit 7 OS=Homo sapiens GN=PSMD7 PE=1 SV=1 - [H3BNT7_HUMAN]	41.81	3	4	4	6	875077	6.00919e+06	4.88042	19.77	2	3	8.20384	35.59	3	3	177	20.0513	5.56689
Q5R3B4	Mitochondrial pyruvate carrier (Fragment) OS=Homo sapiens GN=MPC2 PE=1 SV=1 - [Q5R3B4_HUMAN]	37.14	2	3	3	6	1.68709e+06	8.12368e+06	7.63543	37.14	3	3	9.91039	37.14	3	3	105	11.6732	10.1987
P30405	Peptidyl-prolyl cis-trans isomerase F, mitochondrial OS=Homo sapiens GN=PPIF PE=1 SV=1 - [PPIF_HUMAN]	32.85	3	4	4	6	4.29195e+06	5.73882e+06	5.76151	28.99	3	3	7.4563	22.71	3	3	207	22.0262	9.37842
Q9NS69	Mitochondrial import receptor subunit TOM22 homolog OS=Homo sapiens GN=TOMM22 PE=1 SV=3 - [TOM22_HUMAN]	26.06	1	2	2	6	400980	4.13796e+06	0	8.45	1	3	7.22999	26.06	2	3	142	15.5118	4.33545
P68036	Ubiquitin-conjugating enzyme E2 L3 OS=Homo sapiens GN=UBE2L3 PE=1 SV=1 - [UB2L3_HUMAN]	25.97	3	3	3	6	865307	1.44255e+06	9.03634	21.43	2	3	10.4985	25.97	3	3	154	17.8502	8.51416
Q9NR31	GTP-binding protein SAR1a OS=Homo sapiens GN=SAR1A PE=1 SV=1 - [SAR1A_HUMAN]	25.76	5	2	4	6	4.4367e+06	3.02759e+06	5.99404	15.66	3	3	6.78331	19.7	3	3	198	22.3525	6.68311
P20962	Parathymosin OS=Homo sapiens GN=PTMS PE=1 SV=2 - [PTMS_HUMAN]	22.55	3	2	2	6	1.32143e+07	2.70497e+07	8.66677	22.55	2	3	5.99081	22.55	2	3	102	11.5232	4.15771
Q12904	Aminoacyl tRNA synthase complex-interacting multifunctional protein 1 OS=Homo sapiens GN=AIMP1 PE=1 SV=2 - [AIMP1_HUMAN]	18.91	2	4	4	6	2.05745e+06	3.59576e+06	4.81682	14.1	3	3	4.42728	16.67	3	3	312	34.3311	8.42627
Q9H477	Ribokinase OS=Homo sapiens GN=RBKS PE=1 SV=1 - [RBSK_HUMAN]	15.53	1	4	4	6	1.48469e+06	3.33797e+06	5.84502	12.42	3	3	7.41534	12.42	3	3	322	34.1213	5.04639
P38919	Eukaryotic initiation factor 4A-III OS=Homo sapiens GN=EIF4A3 PE=1 SV=4 - [IF4A3_HUMAN]	14.11	3	3	5	6	5.23914e+06	8.77134e+06	7.6518	8.52	3	3	6.22899	9.49	3	3	411	46.8412	6.72705
O43242	26S proteasome non-ATPase regulatory subunit 3 OS=Homo sapiens GN=PSMD3 PE=1 SV=2 - [PSMD3_HUMAN]	13.48	2	5	5	6	1.04101e+06	2.6354e+06	4.23363	6.18	3	3	2.4925	9.74	3	3	534	60.9395	8.44092
Q3ZCQ8	Mitochondrial import inner membrane translocase subunit TIM50 OS=Homo sapiens GN=TIMM50 PE=1 SV=2 - [TIM50_HUMAN]	13.03	10	3	3	6	1.45818e+06	2.39595e+06	7.72413	7.93	2	3	8.01491	13.03	3	3	353	39.6215	8.36768
C9JH23	Phosphoglycerate mutase (Fragment) OS=Homo sapiens GN=BPGM PE=1 SV=1 - [C9JH23_HUMAN]	12.82	2	1	1	6	120507	593750	3.94518	12.82	1	3	5.71496	12.82	1	3	78	9.21358	6.52197
O75822	Eukaryotic translation initiation factor 3 subunit J OS=Homo sapiens GN=EIF3J PE=1 SV=2 - [EIF3J_HUMAN]	12.79	3	3	3	6	1.41793e+06	3.13295e+06	4.535	12.79	3	3	7.57651	12.79	3	3	258	29.0445	4.83057
P60228	Eukaryotic translation initiation factor 3 subunit E OS=Homo sapiens GN=EIF3E PE=1 SV=1 - [EIF3E_HUMAN]	11.91	6	4	4	6	799692	3.90531e+06	5.39758	7.42	3	3	8.58766	9.66	3	3	445	52.1874	6.03662
Q13243	Serine/arginine-rich splicing factor 5 OS=Homo sapiens GN=SRSF5 PE=1 SV=1 - [SRSF5_HUMAN]	11.03	3	2	3	6	4.64388e+06	9.32293e+06	3.88269	5.88	2	3	6.95021	8.46	2	3	272	31.2453	11.5903
Q8WVM8	Sec1 family domain-containing protein 1 OS=Homo sapiens GN=SCFD1 PE=1 SV=4 - [SCFD1_HUMAN]	10.12	10	5	5	6	1.09871e+06	2.09271e+06	5.27587	6.7	3	3	7.53072	6.39	3	3	642	72.3341	6.26514
Q9BV20	Methylthioribose-1-phosphate isomerase OS=Homo sapiens GN=MRI1 PE=1 SV=1 - [MTNA_HUMAN]	9.21	1	3	3	6	399338	2.46022e+06	6.02573	9.21	3	3	6.3862	6.23	2	3	369	39.1254	6.30322
P14174	Macrophage migration inhibitory factor OS=Homo sapiens GN=MIF PE=1 SV=4 - [MIF_HUMAN]	7.83	1	1	1	6	1.43279e+08	3.34865e+08	6.99384	7.83	1	3	7.57557	7.83	1	3	115	12.4682	7.88428
P56192	Methionine--tRNA ligase, cytoplasmic OS=Homo sapiens GN=MARS PE=1 SV=2 - [SYMC_HUMAN]	5.78	7	4	4	6	2.89351e+06	5.05407e+06	2.51871	4.44	3	3	4.51339	4.67	3	3	900	101.052	6.16357
G5EA31	Protein transport protein Sec24C OS=Homo sapiens GN=SEC24C PE=1 SV=1 - [G5EA31_HUMAN]	5.37	2	4	4	6	419738	1.6316e+06	2.46235	2.02	2	3	4.62286	4.41	3	3	1042	111.914	6.3667
P26885	Peptidyl-prolyl cis-trans isomerase FKBP2 OS=Homo sapiens GN=FKBP2 PE=1 SV=2 - [FKBP2_HUMAN]	33.8	2	5	5	5	1.85207e+06	1.01457e+07	2.10099	19.01	2	2	4.64279	33.1	3	3	142	15.6393	9.12939
B8ZZF7	Sulfotransferase OS=Homo sapiens GN=SULT1C2 PE=1 SV=1 - [B8ZZF7_HUMAN]	33.59	6	5	5	5	1.60787e+06	5.35037e+06	3.84396	8.11	2	2	4.51088	28.96	3	3	259	30.6331	6.72705
Q5T123	SH3 domain-binding glutamic acid-rich-like protein 3 OS=Homo sapiens GN=SH3BGRL3 PE=1 SV=1 - [Q5T123_HUMAN]	32.95	2	2	2	5	4.8938e+06	1.93359e+07	1.74568	32.95	2	2	6.6401	32.95	2	3	88	9.37476	9.36377
D6R9Z7	Cytochrome c oxidase subunit 7C, mitochondrial OS=Homo sapiens GN=COX7C PE=1 SV=1 - [D6R9Z7_HUMAN]	32.14	2	3	3	5	1.24666e+07	6.87551e+06	4.71736	32.14	2	2	6.78372	32.14	3	3	56	6.37831	9.83252
P62750	60S ribosomal protein L23a OS=Homo sapiens GN=RPL23A PE=1 SV=1 - [RL23A_HUMAN]	30.77	6	4	4	5	2.76832e+06	6.19453e+06	4.32295	15.38	2	2	8.07391	23.72	3	3	156	17.6841	10.4478
P26447	Protein S100-A4 OS=Homo sapiens GN=S100A4 PE=1 SV=1 - [S10A4_HUMAN]	27.72	1	3	3	5	1.35721e+06	1.67748e+06	4.11963	18.81	2	2	4.86371	27.72	3	3	101	11.7207	6.11279
P61923	Coatomer subunit zeta-1 OS=Homo sapiens GN=COPZ1 PE=1 SV=1 - [COPZ1_HUMAN]	27.12	9	3	3	5	1.92977e+06	2.78309e+06	0	18.64	2	2	8.6837	27.12	3	3	177	20.1855	4.80518
Q9UHV9	Prefoldin subunit 2 OS=Homo sapiens GN=PFDN2 PE=1 SV=1 - [PFD2_HUMAN]	26.62	1	3	3	5	2.14797e+06	4.03626e+06	2.25408	16.88	2	2	8.42272	26.62	3	3	154	16.6376	6.58057
O14602	Eukaryotic translation initiation factor 1A, Y-chromosomal OS=Homo sapiens GN=EIF1AY PE=1 SV=4 - [IF1AY_HUMAN]	26.39	4	3	3	5	2.48946e+06	5.34872e+06	2.85588	19.44	2	2	5.45537	26.39	3	3	144	16.4323	5.23682
P61077	Ubiquitin-conjugating enzyme E2 D3 OS=Homo sapiens GN=UBE2D3 PE=1 SV=1 - [UB2D3_HUMAN]	24.49	20	3	3	5	592195	7.08235e+06	4.01827	17.01	2	2	8.07624	24.49	3	3	147	16.6764	7.79639
P62306	Small nuclear ribonucleoprotein F OS=Homo sapiens GN=SNRPF PE=1 SV=1 - [RUXF_HUMAN]	24.42	1	2	2	5	1.09229e+06	2.37625e+06	2.27703	15.12	1	2	2.52627	24.42	2	3	86	9.71878	4.66553
O43181	NADH dehydrogenase [ubiquinone] iron-sulfur protein 4, mitochondrial OS=Homo sapiens GN=NDUFS4 PE=1 SV=1 - [NDUS4_HUMAN]	22.86	2	4	4	5	2.8861e+06	1.692e+07	2.13409	9.14	2	2	7.48667	19.43	3	3	175	20.0954	10.3013
Q9BPX5	Actin-related protein 2/3 complex subunit 5-like protein OS=Homo sapiens GN=ARPC5L PE=1 SV=1 - [ARP5L_HUMAN]	21.57	1	2	2	5	1.82595e+06	6.14508e+06	4.34812	7.84	1	2	5.6564	21.57	2	3	153	16.9308	6.59521
Q8J015	60S ribosomal protein L13a OS=Homo sapiens GN=RPL13a PE=1 SV=1 - [Q8J015_HUMAN]	20.42	4	3	3	5	2.96287e+06	9.30908e+06	5.10713	14.79	2	2	6.89513	20.42	3	3	142	16.7204	10.814
Q15185	Prostaglandin E synthase 3 OS=Homo sapiens GN=PTGES3 PE=1 SV=1 - [TEBP_HUMAN]	20	2	3	3	5	5.68717e+06	4.37345e+06	7.23585	18.75	2	2	7.54168	20	3	3	160	18.6854	4.53857
Q8N8N7	Prostaglandin reductase 2 OS=Homo sapiens GN=PTGR2 PE=1 SV=1 - [PTGR2_HUMAN]	19.94	3	5	5	5	235566	2.81714e+06	2.41818	12.54	2	2	3.88257	7.41	3	3	351	38.4743	5.41455
Q07666	KH domain-containing, RNA-binding, signal transduction-associated protein 1 OS=Homo sapiens GN=KHDRBS1 PE=1 SV=1 - [KHDR1_HUMAN]	19.86	1	4	4	5	982101	2.2762e+06	5.16953	6.32	2	2	2.17615	13.54	2	3	443	48.1972	8.66064
Q9Y6B6	GTP-binding protein SAR1b OS=Homo sapiens GN=SAR1B PE=1 SV=1 - [SAR1B_HUMAN]	19.7	7	1	3	5	4.4367e+06	1.13962e+07	3.8254	9.6	2	2	6.98486	19.7	3	3	198	22.3955	6.11279
O15372	Eukaryotic translation initiation factor 3 subunit H OS=Homo sapiens GN=EIF3H PE=1 SV=1 - [EIF3H_HUMAN]	19.32	9	4	4	5	453896	1.74455e+06	4.20709	8.52	2	2	6.45392	16.19	3	3	352	39.9051	6.53662
P50453	Serpin B9 OS=Homo sapiens GN=SERPINB9 PE=1 SV=1 - [SPB9_HUMAN]	19.15	4	4	5	5	684925	1.47467e+06	2.10555	5.32	2	2	2.86205	13.83	3	3	376	42.3763	5.85889
M0R208	ATP-dependent Clp protease proteolytic subunit OS=Homo sapiens GN=CLPP PE=1 SV=1 - [M0R208_HUMAN]	18.42	3	3	3	5	1.11919e+06	2.25563e+06	3.91685	10.53	2	2	3.93673	14.21	2	3	190	20.5554	5.50342
O95292	Vesicle-associated membrane protein-associated protein B/C OS=Homo sapiens GN=VAPB PE=1 SV=3 - [VAPB_HUMAN]	17.7	2	3	3	5	2.27309e+06	4.70394e+06	0	11.93	2	2	7.5653	17.7	3	3	243	27.2111	7.29834
D3YTB1	60S ribosomal protein L32 (Fragment) OS=Homo sapiens GN=RPL32 PE=1 SV=1 - [D3YTB1_HUMAN]	17.29	3	2	2	5	2.51229e+06	2.92295e+06	2.2568	17.29	2	2	6.81404	17.29	2	3	133	15.6067	11.4438
O95298	NADH dehydrogenase [ubiquinone] 1 subunit C2 OS=Homo sapiens GN=NDUFC2 PE=1 SV=1 - [NDUC2_HUMAN]	16.81	2	2	2	5	3.56189e+06	1.19814e+07	2.88912	16.81	2	2	5.05823	16.81	2	3	119	14.1784	8.98291
G3V1D4	Lin-7 homolog C (C. elegans), isoform CRA_b OS=Homo sapiens GN=LIN7C PE=1 SV=1 - [G3V1D4_HUMAN]	15.61	3	3	3	5	1.59901e+06	2.6801e+06	3.56908	10.4	2	2	3.69146	15.61	3	3	173	19.1742	9.0708
P02743	Serum amyloid P-component OS=Homo sapiens GN=APCS PE=1 SV=2 - [SAMP_HUMAN]	15.25	1	4	4	5	1.63235e+06	3.90265e+06	1.86909	11.66	2	2	6.6862	10.76	3	3	223	25.3711	6.53662
Q1JUQ5	Peptidylprolyl isomerase OS=Homo sapiens GN=FKBP12-Exip2 PE=1 SV=1 - [Q1JUQ5_HUMAN]	15.22	3	1	1	5	2.66892e+06	2.16739e+06	2.88098	15.22	1	2	8.05453	15.22	1	3	92	10.1122	5.89697
Q92905	COP9 signalosome complex subunit 5 OS=Homo sapiens GN=COPS5 PE=1 SV=4 - [CSN5_HUMAN]	14.97	6	4	4	5	644932	2399081	2.08746	6.89	2	2	6.75068	11.08	3	3	334	37.5547	6.53662
O75436	Vacuolar protein sorting-associated protein 26A OS=Homo sapiens GN=VPS26A PE=1 SV=2 - [VP26A_HUMAN]	14.68	3	3	3	5	1.05708e+06	3.53202e+06	4.2958	9.48	2	2	7.56764	9.17	2	3	327	38.1457	6.56592
O76094	Signal recognition particle subunit SRP72 OS=Homo sapiens GN=SRP72 PE=1 SV=3 - [SRP72_HUMAN]	14.61	3	5	5	5	700677	1.42288e+06	0	4.92	2	2	5.77409	9.69	3	3	671	74.56	9.26123
J3QR09	Ribosomal protein L19 OS=Homo sapiens GN=RPL19 PE=1 SV=1 - [J3QR09_HUMAN]	14.51	4	3	3	5	3.11384e+06	9.79534e+06	1.61816	13.47	2	2	4.552	14.51	3	3	193	23.1201	11.4731
E7EWE1	Ubiquitin-like modifier-activating enzyme 5 OS=Homo sapiens GN=UBA5 PE=1 SV=1 - [E7EWE1_HUMAN]	14.41	6	3	3	5	915586	1.73658e+06	1.67402	10.95	2	2	3.05013	14.41	3	3	347	38.7283	5.46533
Q9UJW0	Dynactin subunit 4 OS=Homo sapiens GN=DCTN4 PE=1 SV=1 - [DCTN4_HUMAN]	12.61	4	4	4	5	1.26348e+06	2.23475e+06	2.01467	7.39	2	2	7.13204	8.91	3	3	460	52.3036	7.34229
P68402	Platelet-activating factor acetylhydrolase IB subunit beta OS=Homo sapiens GN=PAFAH1B2 PE=1 SV=1 - [PA1B2_HUMAN]	12.23	2	2	2	5	3.77954e+06	1.45218e+07	5.58412	8.3	1	2	8.55287	12.23	2	3	229	25.5531	5.92236
Q9NR12	PDZ and LIM domain protein 7 OS=Homo sapiens GN=PDLIM7 PE=1 SV=1 - [PDLI7_HUMAN]	10.94	5	4	4	5	337564	1.86871e+06	4.0756	5.03	2	2	7.19323	8.32	3	3	457	49.8126	8.41162
O94819	Kelch repeat and BTB domain-containing protein 11 OS=Homo sapiens GN=KBTBD11 PE=1 SV=1 - [KBTBB_HUMAN]	10.11	1	4	4	5	425048	860317	1.66211	4.65	2	2	7.2338	7.7	3	3	623	65.6788	6.07471
Q9BQE5	Apolipoprotein L2 OS=Homo sapiens GN=APOL2 PE=1 SV=1 - [APOL2_HUMAN]	9.79	2	3	3	5	339665	1.42583e+06	5.09431	6.53	2	2	6.43181	9.79	3	3	337	37.0694	6.7417
Q13630	GDP-L-fucose synthase OS=Homo sapiens GN=TSTA3 PE=1 SV=1 - [FCL_HUMAN]	9.35	7	3	3	5	2.18893e+06	3.64366e+06	2.57893	7.17	2	2	6.65483	9.35	3	3	321	35.87	6.59521
P26639	Threonine--tRNA ligase, cytoplasmic OS=Homo sapiens GN=TARS PE=1 SV=3 - [SYTC_HUMAN]	9.13	2	4	4	5	120245	1.14367e+06	4.21587	3.73	2	2	7.60255	7.19	3	3	723	83.3819	6.66846
P41091	Eukaryotic translation initiation factor 2 subunit 3 OS=Homo sapiens GN=EIF2S3 PE=1 SV=3 - [IF2G_HUMAN]	8.9	4	3	3	5	1.99537e+06	3.85249e+06	5.69635	5.08	2	2	7.98874	8.9	3	3	472	51.0772	8.39697
Q9Y266	Nuclear migration protein nudC OS=Homo sapiens GN=NUDC PE=1 SV=1 - [NUDC_HUMAN]	8.76	3	3	3	5	780313	2.57886e+06	3.31286	5.44	2	2	3.99203	8.76	3	3	331	38.2191	5.37646
H3BR35	Eukaryotic peptide chain release factor GTP-binding subunit ERF3A (Fragment) OS=Homo sapiens GN=GSPT1 PE=1 SV=1 - [H3BR35_HUMAN]	8.63	3	4	4	5	1.2794e+06	2.79519e+06	5.14286	4.42	2	2	6.43303	6.53	3	3	475	52.9087	5.63037
C9JFE4	COP9 signalosome complex subunit 1 OS=Homo sapiens GN=GPS1 PE=1 SV=2 - [C9JFE4_HUMAN]	7.86	6	3	3	5	961386	1.59599e+06	2.1199	5.73	2	2	7.14463	7.86	3	3	471	53.338	6.7417
Q9BX97	Plasmalemma vesicle-associated protein OS=Homo sapiens GN=PLVAP PE=2 SV=1 - [PLVAP_HUMAN]	7.47	1	3	3	5	1.00195e+06	4.19596e+06	2.13937	7.24	2	2	6.1827	7.47	3	3	442	50.5621	8.79248
P48637	Glutathione synthetase OS=Homo sapiens GN=GSS PE=1 SV=1 - [GSHB_HUMAN]	5.49	1	3	3	5	2.72994e+06	3.95155e+06	3.93966	3.8	2	2	5.09786	5.49	3	3	474	52.3523	5.92236
A4QPE4	SPTBN2 protein OS=Homo sapiens GN=SPTBN2 PE=1 SV=1 - [A4QPE4_HUMAN]	5.46	2	1	4	5	2.3759e+06	3.92669e+06	3.6464	2.36	2	2	7.20876	4.07	3	3	934	105.601	7.75244
Q9BYE9	Cadherin-related family member 2 OS=Homo sapiens GN=CDHR2 PE=1 SV=2 - [CDHR2_HUMAN]	3.66	1	4	4	5	907207	2.08977e+06	3.93776	1.91	2	2	3.56311	2.67	3	3	1310	141.455	4.50049
Q9NQT8	Kinesin-like protein KIF13B OS=Homo sapiens GN=KIF13B PE=1 SV=2 - [KI13B_HUMAN]	2.96	4	3	4	5	273222	864249	2.30081	1.31	2	2	4.39055	2.35	3	3	1826	202.663	5.88428
J3KR24	Isoleucine--tRNA ligase, cytoplasmic OS=Homo sapiens GN=IARS PE=1 SV=1 - [J3KR24_HUMAN]	2.34	3	3	3	5	723885	1.35374e+06	3.71122	1.65	2	2	4.13468	2.34	3	3	1152	131.68	6.11279
C9JIZ0	LSM8 homolog, U6 small nuclear RNA associated (S. cerevisiae), isoform CRA_a OS=Homo sapiens GN=LSM8 PE=1 SV=1 - [C9JIZ0_HUMAN]	58.67	4	3	3	4	171150	5.28923e+06	2.1061	21.33	1	1	5.31066	58.67	3	3	75	8.10414	4.34814
F8VNS3	3-oxoacyl-[acyl-carrier-protein] synthase, mitochondrial OS=Homo sapiens GN=OXSM PE=1 SV=1 - [F8VNS3_HUMAN]	50	4	3	3	4	982527	2.30996e+06	1.89224	16.67	1	1	2.65871	50	3	3	102	11.177	9.48096
P50238	Cysteine-rich protein 1 OS=Homo sapiens GN=CRIP1 PE=1 SV=3 - [CRIP1_HUMAN]	45.45	3	2	2	4	1.79714e+06	8.27842e+06	0	36.36	1	1	3.20564	45.45	2	3	77	8.52701	8.74854
H3BR27	RNA-binding motif protein, X chromosome OS=Homo sapiens GN=RBMX PE=1 SV=1 - [H3BR27_HUMAN]	43.59	8	3	3	4	723302	1.77826e+06	2.0047	10.26	1	1	8.12947	43.59	3	3	78	8.60437	5.49072
Q15836	Vesicle-associated membrane protein 3 OS=Homo sapiens GN=VAMP3 PE=1 SV=3 - [VAMP3_HUMAN]	40	7	3	3	4	1.20955e+06	9.52728e+06	3.15902	24	1	1	9.59814	40	3	3	100	11.302	8.79248
E5RHG8	Elongin-C (Fragment) OS=Homo sapiens GN=ELOC PE=1 SV=1 - [E5RHG8_HUMAN]	38.2	3	2	2	4	2.18943e+06	5.51784e+06	1.90773	15.73	1	1	5.45185	38.2	2	3	89	9.95372	5.38916
O60888	Protein CutA OS=Homo sapiens GN=CUTA PE=1 SV=2 - [CUTA_HUMAN]	32.96	3	3	3	4	6.28588e+06	1.50445e+07	2.19773	7.82	1	1	10.1493	32.96	3	3	179	19.1041	5.50342
P62854	40S ribosomal protein S26 OS=Homo sapiens GN=RPS26 PE=1 SV=3 - [RS26_HUMAN]	31.3	2	3	3	4	1.3491e+06	9.3941e+06	2.29279	10.43	1	1	5.59055	31.3	3	3	115	13.0071	11.0044
A0A0B4J1Z1	Serine/arginine-rich-splicing factor 7 OS=Homo sapiens GN=SRSF7 PE=1 SV=1 - [A0A0B4J1Z1_HUMAN]	29.2	3	2	3	4	1.94252e+06	9.58139e+06	1.69671	6.57	1	1	8.32855	29.2	3	3	137	15.7528	9.80322
P01111	GTPase NRas OS=Homo sapiens GN=NRAS PE=1 SV=1 - [RASN_HUMAN]	27.51	3	1	3	4	3.54003e+06	7.67694e+06	2.17843	5.82	1	1	3.80399	27.51	3	3	189	21.2155	5.17334
P01112	GTPase HRas OS=Homo sapiens GN=HRAS PE=1 SV=1 - [RASH_HUMAN]	27.51	4	1	3	4	3.54003e+06	8.96654e+06	2.17843	5.82	1	1	4.94882	27.51	3	3	189	21.2846	5.31299
Q96C01	Protein FAM136A OS=Homo sapiens GN=FAM136A PE=1 SV=1 - [F136A_HUMAN]	23.91	4	3	3	4	1.01399e+06	804945	1.85095	7.25	1	1	2.31935	23.91	3	3	138	15.6307	7.60596
Q5QPP3	UDP-glucose 4-epimerase (Fragment) OS=Homo sapiens GN=GALE PE=1 SV=1 - [Q5QPP3_HUMAN]	23.79	5	3	3	4	272835	1.67977e+06	2.60238	9.25	1	1	0	23.79	3	3	227	25.0146	8.06006
A0A0A6YYA0	Protein TMED7-TICAM2 OS=Homo sapiens GN=TMED7-TICAM2 PE=3 SV=1 - [A0A0A6YYA0_HUMAN]	22.34	3	3	3	4	2.27864e+06	4.37056e+06	2.4483	6.38	1	1	8.71471	22.34	3	3	188	21.2194	6.20166
B1AJY7	26S proteasome non-ATPase regulatory subunit 10 OS=Homo sapiens GN=PSMD10 PE=1 SV=1 - [B1AJY7_HUMAN]	22.28	3	2	2	4	1.69693e+06	7.70666e+06	3.04661	10.88	1	1	5.48264	22.28	2	3	193	20.7946	6.63916
Q16270	Insulin-like growth factor-binding protein 7 OS=Homo sapiens GN=IGFBP7 PE=1 SV=1 - [IBP7_HUMAN]	21.99	1	3	3	4	602288	3.74768e+06	0	7.8	1	1	5.19525	21.99	3	3	282	29.1114	7.89893
B4DNC9	Iron-sulfur cluster assembly enzyme ISCU, mitochondrial OS=Homo sapiens GN=ISCU PE=1 SV=1 - [B4DNC9_HUMAN]	19.48	4	3	3	4	1.25711e+06	1.51182e+06	2.25495	5.84	1	1	2.0247	19.48	3	3	154	16.5448	9.53955
A0A0G2JII1	HLA class II histocompatibility antigen, DP beta 1 chain OS=Homo sapiens GN=HLA-DPB1 PE=1 SV=1 - [A0A0G2JII1_HUMAN]	19.3	23	4	4	4	1.98181e+06	1.9241e+06	0	3.95	1	1	4.41221	15.35	3	3	228	25.75	8.17725
B5MCT7	Protein phosphatase 1F OS=Homo sapiens GN=PPM1F PE=1 SV=1 - [B5MCT7_HUMAN]	19.23	4	3	3	4	2.7556e+06	2.73494e+06	3.6199	6.99	1	1	8.89178	19.23	3	3	286	31.2437	5.77002
Q96GK7	Fumarylacetoacetate hydrolase domain-containing protein 2A OS=Homo sapiens GN=FAHD2A PE=1 SV=1 - [FAH2A_HUMAN]	18.15	4	3	3	4	1.52556e+06	8.02249e+06	0	4.78	1	1	7.96071	18.15	3	3	314	34.5741	8.23584
Q9UII2	ATPase inhibitor, mitochondrial OS=Homo sapiens GN=ATPIF1 PE=1 SV=1 - [ATIF1_HUMAN]	17.92	1	2	2	4	1.11474e+07	1.00019e+07	2.47634	7.55	1	1	9.58314	17.92	2	3	106	12.2413	9.34912
Q9BRX8	Redox-regulatory protein FAM213A OS=Homo sapiens GN=FAM213A PE=1 SV=3 - [F213A_HUMAN]	16.59	1	3	3	4	3.64991e+06	3.37912e+06	2.33847	4.37	1	1	4.99708	16.59	3	3	229	25.7474	8.83643
P09497	Clathrin light chain B OS=Homo sapiens GN=CLTB PE=1 SV=1 - [CLCB_HUMAN]	15.72	2	4	4	4	1.20715e+06	3.05289e+06	1.95015	3.93	1	1	4.51791	11.79	3	3	229	25.1751	4.64014
Q9NXG2	THUMP domain-containing protein 1 OS=Homo sapiens GN=THUMPD1 PE=1 SV=2 - [THUM1_HUMAN]	15.58	2	3	3	4	38808.1	1.79683e+06	0	4.53	1	1	5.25568	15.58	3	3	353	39.2908	7.88428
P11908	Ribose-phosphate pyrophosphokinase 2 OS=Homo sapiens GN=PRPS2 PE=1 SV=2 - [PRPS2_HUMAN]	15.09	7	1	3	4	346895	1.72274e+06	3.25362	5.35	1	1	9.42955	15.09	3	3	318	34.747	6.60986
O43837	Isocitrate dehydrogenase [NAD] subunit beta, mitochondrial OS=Homo sapiens GN=IDH3B PE=1 SV=2 - [IDH3B_HUMAN]	14.81	4	4	4	4	2.03338e+06	2.68169e+06	2.0137	3.38	1	1	4.96652	11.43	3	3	385	42.1566	8.45557
G3XAC6	RNA-binding protein 39 OS=Homo sapiens GN=RBM39 PE=1 SV=1 - [G3XAC6_HUMAN]	14.66	7	3	3	4	367407	1.10321e+06	1.77919	2.6	1	1	5.38822	14.66	3	3	423	47.9941	10.5649
P25311	Zinc-alpha-2-glycoprotein OS=Homo sapiens GN=AZGP1 PE=1 SV=2 - [ZA2G_HUMAN]	14.43	3	3	3	4	1.296e+06	3.91258e+06	1.83639	3.36	1	1	9.10007	14.43	3	3	298	34.2371	6.04932
A0A087X020	Ribosome maturation protein SBDS OS=Homo sapiens GN=SBDS PE=1 SV=1 - [A0A087X020_HUMAN]	14.4	3	3	3	4	2.00034e+06	2.95472e+06	1.94452	3.2	1	1	8.78755	14.4	3	3	250	28.8463	8.74854
K7ENG2	Splicing factor U2AF 65 kDa subunit OS=Homo sapiens GN=U2AF2 PE=1 SV=1 - [K7ENG2_HUMAN]	14.33	2	3	3	4	216527	4.3809e+06	1.82221	3.26	1	1	5.3333	14.33	3	3	307	33.8799	5.03369
P00492	Hypoxanthine-guanine phosphoribosyltransferase OS=Homo sapiens GN=HPRT1 PE=1 SV=2 - [HPRT_HUMAN]	14.22	1	3	3	4	1.05187e+06	2.46365e+06	1.97197	4.59	1	1	4.12134	14.22	3	3	218	24.5636	6.68311
Q9Y697	Cysteine desulfurase, mitochondrial OS=Homo sapiens GN=NFS1 PE=1 SV=3 - [NFS1_HUMAN]	13.13	8	4	4	4	344549	1.3355e+06	0	3.5	1	1	2.65465	9.63	3	3	457	50.1639	8.30908
H0YG54	Oligoribonuclease, mitochondrial OS=Homo sapiens GN=REXO2 PE=1 SV=2 - [H0YG54_HUMAN]	12.77	4	3	3	4	3.12951e+06	2.86391e+06	0	4.26	1	1	4.34613	12.77	3	3	188	21.8341	6.30322
A0A0C4DGB2	Glutamate--cysteine ligase catalytic subunit OS=Homo sapiens GN=GCLC PE=1 SV=1 - [A0A0C4DGB2_HUMAN]	11.51	4	3	3	4	814709	1.31305e+06	1.83679	3.57	1	1	3.80366	11.51	3	3	252	28.7334	7.60596
P01019	Angiotensinogen OS=Homo sapiens GN=AGT PE=1 SV=1 - [ANGT_HUMAN]	10.72	1	3	3	4	2.2973e+06	2.2622e+06	3.06821	2.47	1	1	9.15787	10.72	3	3	485	53.1205	6.31592
O43809	Cleavage and polyadenylation specificity factor subunit 5 OS=Homo sapiens GN=NUDT21 PE=1 SV=1 - [CPSF5_HUMAN]	10.13	3	3	3	4	817522	1.92539e+06	0	3.96	1	1	3.98323	10.13	3	3	227	26.2107	8.82178
Q96M27	Protein PRRC1 OS=Homo sapiens GN=PRRC1 PE=1 SV=1 - [PRRC1_HUMAN]	10.11	1	3	3	4	855902	1.89114e+06	2.25229	3.37	1	1	3.43344	6.74	2	3	445	46.6718	5.8335
C9J3L8	Translocon-associated protein subunit alpha OS=Homo sapiens GN=SSR1 PE=1 SV=1 - [C9J3L8_HUMAN]	9.81	5	2	2	4	841728	5.82419e+06	2.42537	4.15	1	1	5.85775	9.81	2	3	265	29.5548	4.29736
Q9NVG8	TBC1 domain family member 13 OS=Homo sapiens GN=TBC1D13 PE=1 SV=3 - [TBC13_HUMAN]	9.75	1	3	3	4	782799	1.78805e+06	0	3	1	1	6.80978	9.75	3	3	400	46.5236	5.23682
O00116	Alkyldihydroxyacetonephosphate synthase, peroxisomal OS=Homo sapiens GN=AGPS PE=1 SV=1 - [ADAS_HUMAN]	9.27	3	3	3	4	457506	1.32181e+06	2.66403	1.98	1	1	3.61659	9.27	3	3	658	72.8658	7.34229
P50148	Guanine nucleotide-binding protein G(q) subunit alpha OS=Homo sapiens GN=GNAQ PE=1 SV=4 - [GNAQ_HUMAN]	8.91	5	1	3	4	3.96341e+06	4.73459e+06	2.13678	3.06	1	1	6.32365	8.91	3	3	359	42.1153	5.68115
Q6NUM9	All-trans-retinol 13,14-reductase OS=Homo sapiens GN=RETSAT PE=1 SV=2 - [RETST_HUMAN]	8.85	4	4	4	4	863706	6.3487e+06	0	1.97	1	1	4.71849	6.89	3	3	610	66.7767	8.27979
Q9H9A6	Leucine-rich repeat-containing protein 40 OS=Homo sapiens GN=LRRC40 PE=1 SV=1 - [LRC40_HUMAN]	8.8	1	3	3	4	197575	419358	0	1.66	1	1	1.64501	8.8	3	3	602	68.2071	6.43018
A0MZ66	Shootin-1 OS=Homo sapiens GN=SHTN1 PE=1 SV=4 - [SHOT1_HUMAN]	8.56	1	4	4	4	365250	969936	2.10941	1.74	1	1	6.92528	6.81	3	3	631	71.5957	5.32568
A6NJA2	Ubiquitin carboxyl-terminal hydrolase 14 OS=Homo sapiens GN=USP14 PE=1 SV=2 - [A6NJA2_HUMAN]	8.26	4	2	2	4	277232	4.31295e+06	2.06325	2.9	1	1	6.88033	8.26	2	3	448	51.0537	5.92236
Q9NSK0	Kinesin light chain 4 OS=Homo sapiens GN=KLC4 PE=1 SV=3 - [KLC4_HUMAN]	8.24	13	2	4	4	433595	1.31501e+06	1.97721	1.78	1	1	4.10511	6.46	3	3	619	68.5976	6.17627
F8W9X7	Coiled-coil domain-containing protein 93 OS=Homo sapiens GN=CCDC93 PE=1 SV=1 - [F8W9X7_HUMAN]	7.94	2	4	4	4	948613	1.03253e+06	0	1.59	1	1	4.24048	6.35	3	3	630	72.9958	7.98682
P14324	Farnesyl pyrophosphate synthase OS=Homo sapiens GN=FDPS PE=1 SV=4 - [FPPS_HUMAN]	7.4	5	3	3	4	1.35246e+06	3.57539e+06	2.01498	2.15	1	1	2.49476	7.4	3	3	419	48.2446	6.15088
Q7Z3D6	UPF0317 protein C14orf159, mitochondrial OS=Homo sapiens GN=C14orf159 PE=1 SV=2 - [CN159_HUMAN]	7.31	5	3	3	4	2.90069e+06	3.19132e+06	2.98873	1.95	1	1	9.97144	7.31	3	3	616	66.394	6.78564
P16989	Y-box-binding protein 3 OS=Homo sapiens GN=YBX3 PE=1 SV=4 - [YBOX3_HUMAN]	7.26	3	1	2	4	2.21893e+06	4.36835e+06	1.69606	2.15	1	1	6.02823	7.26	2	3	372	40.066	9.77393
Q9UBX5	Fibulin-5 OS=Homo sapiens GN=FBLN5 PE=1 SV=1 - [FBLN5_HUMAN]	7.14	4	3	3	4	299277	546986	1.65411	2.68	1	1	0	7.14	3	3	448	50.1467	4.729
O43237	Cytoplasmic dynein 1 light intermediate chain 2 OS=Homo sapiens GN=DYNC1LI2 PE=1 SV=1 - [DC1L2_HUMAN]	6.91	4	3	3	4	113701	658590	2.99409	3.66	1	1	5.15058	6.91	3	3	492	54.0655	6.37939
O60884	DnaJ homolog subfamily A member 2 OS=Homo sapiens GN=DNAJA2 PE=1 SV=1 - [DNJA2_HUMAN]	6.8	2	2	2	4	1.45925e+06	1.25285e+06	1.70082	3.16	1	1	4.03297	6.8	2	3	412	45.7166	6.48096
O96008	Mitochondrial import receptor subunit TOM40 homolog OS=Homo sapiens GN=TOMM40 PE=1 SV=1 - [TOM40_HUMAN]	6.65	3	2	2	4	81035.4	1.81188e+06	0	2.49	1	1	7.89999	6.65	2	3	361	37.8691	7.25439
A0A075B738	Platelet endothelial cell adhesion molecule OS=Homo sapiens GN=PECAM1 PE=1 SV=1 - [A0A075B738_HUMAN]	6.5	5	3	3	4	531093	3.16771e+06	1.6944	1.49	1	1	6.94027	6.5	3	3	738	82.4698	6.99072
Q9H2G2	STE20-like serine/threonine-protein kinase OS=Homo sapiens GN=SLK PE=1 SV=1 - [SLK_HUMAN]	4.21	1	4	4	4	500190	1.45724e+06	0	1.05	1	1	1.87973	3.16	3	3	1235	142.607	5.14795
Q9NZB2	Constitutive coactivator of PPAR-gamma-like protein 1 OS=Homo sapiens GN=FAM120A PE=1 SV=2 - [F120A_HUMAN]	3.94	4	3	3	4	881852	1.81707e+06	0	1.52	1	1	2.39768	3.94	3	3	1118	121.811	8.88037
P35573	Glycogen debranching enzyme OS=Homo sapiens GN=AGL PE=1 SV=3 - [GDE_HUMAN]	3.85	1	3	3	4	0	2.31514e+06	2.06685	0.98	1	1	3.19933	2.87	2	3	1532	174.652	6.75635
A0A087X0K9	Tight junction protein ZO-1 OS=Homo sapiens GN=TJP1 PE=1 SV=1 - [A0A087X0K9_HUMAN]	2.8	5	4	4	4	646493	605969	1.7563	0.6	1	1	4.43996	2.21	3	3	1676	187.734	6.69775
Q9UHA4	Ragulator complex protein LAMTOR3 OS=Homo sapiens GN=LAMTOR3 PE=1 SV=1 - [LTOR3_HUMAN]	49.19	1	3	3	3	0	3.0422e+06		0			4.3612	49.19	3	3	124	13.6143	7.34229
P12074	Cytochrome c oxidase subunit 6A1, mitochondrial OS=Homo sapiens GN=COX6A1 PE=1 SV=4 - [CX6A1_HUMAN]	43.12	2	2	2	3	0	6.87838e+07		0			6.16625	43.12	2	3	109	12.1471	9.31982
E5RGN3	Copper transport protein ATOX1 OS=Homo sapiens GN=ATOX1 PE=1 SV=1 - [E5RGN3_HUMAN]	30.51	3	1	1	3	0	3.90527e+06		0			6.1931	30.51	1	3	59	6.32625	7.85498
K7ER90	Eukaryotic translation initiation factor 3 subunit G (Fragment) OS=Homo sapiens GN=EIF3G PE=1 SV=1 - [K7ER90_HUMAN]	27.31	5	3	3	3	0	3.75526e+06		0			5.33022	27.31	3	3	227	25.4258	5.49072
O75884	Putative hydrolase RBBP9 OS=Homo sapiens GN=RBBP9 PE=1 SV=2 - [RBBP9_HUMAN]	26.34	1	3	3	3	0	1.90682e+06		0			6.57767	26.34	3	3	186	20.9865	6.20166
Q7Z7H5	Transmembrane emp24 domain-containing protein 4 OS=Homo sapiens GN=TMED4 PE=1 SV=1 - [TMED4_HUMAN]	23.79	2	2	3	3	0	1.9249e+06		0			5.37086	23.79	3	3	227	25.9263	8.27979
P62633	Cellular nucleic acid-binding protein OS=Homo sapiens GN=CNBP PE=1 SV=1 - [CNBP_HUMAN]	22.6	1	3	3	3	0	2.19262e+06		0			5.277	22.6	3	3	177	19.4496	7.7085
Q9BQI0	Allograft inflammatory factor 1-like OS=Homo sapiens GN=AIF1L PE=1 SV=1 - [AIF1L_HUMAN]	22	3	3	3	3	0	2.14384e+06		0			3.41217	22	3	3	150	17.0566	7.1958
Q86VU5	Catechol O-methyltransferase domain-containing protein 1 OS=Homo sapiens GN=COMTD1 PE=1 SV=1 - [CMTD1_HUMAN]	20.23	2	3	3	3	0	2.50154e+06		0			2.261	20.23	3	3	262	28.7904	8.38232
A0A0G2JH46	HLA class II histocompatibility antigen, DR alpha chain OS=Homo sapiens GN=HLA-DRA PE=1 SV=1 - [A0A0G2JH46_HUMAN]	20.09	8	3	3	3	0	3.87508e+06		0			9.38462	20.09	3	3	229	25.8292	5.10986
Q07812	Apoptosis regulator BAX OS=Homo sapiens GN=BAX PE=1 SV=1 - [BAX_HUMAN]	18.75	3	3	3	3	0	2.43543e+06		0			6.26271	18.75	3	3	192	21.1708	5.22412
M0R3C3	Very-long-chain enoyl-CoA reductase OS=Homo sapiens GN=TECR PE=1 SV=1 - [M0R3C3_HUMAN]	18.1	2	2	2	3	0	2.57344e+06		0			9.5399	18.1	2	3	105	11.7663	9.20264
Q9H1E5	Thioredoxin-related transmembrane protein 4 OS=Homo sapiens GN=TMX4 PE=1 SV=1 - [TMX4_HUMAN]	17.77	1	3	3	3	0	2.24979e+06		0			5.48659	17.77	3	3	349	38.9277	4.37354
Q7Z3B1	Neuronal growth regulator 1 OS=Homo sapiens GN=NEGR1 PE=1 SV=3 - [NEGR1_HUMAN]	17.51	1	3	3	3	0	4.29635e+06		0			4.99309	17.51	3	3	354	38.6943	6.21436
Q99653	Calcineurin B homologous protein 1 OS=Homo sapiens GN=CHP1 PE=1 SV=3 - [CHP1_HUMAN]	17.44	5	2	2	3	0	4.79262e+06		0			2.03058	17.44	2	3	195	22.4423	5.09717
E9PIX6	Protein arginine N-methyltransferase 1 (Fragment) OS=Homo sapiens GN=PRMT1 PE=1 SV=2 - [E9PIX6_HUMAN]	17.39	8	3	3	3	0	761512		0			6.80435	17.39	3	3	207	23.8211	6.30322
D6RD17	Immunoglobulin J chain (Fragment) OS=Homo sapiens GN=JCHAIN PE=1 SV=8 - [D6RD17_HUMAN]	17.2	4	2	2	3	0	1.1104e+07		0			7.91814	17.2	2	3	157	18.009	5.60498
F5GX30	Cation-dependent mannose-6-phosphate receptor OS=Homo sapiens GN=M6PR PE=1 SV=2 - [F5GX30_HUMAN]	16.75	7	2	2	3	0	2.61836e+06		0			4.21382	16.75	2	3	191	21.5247	6.66846
J3QL56	Protein SCO1 homolog, mitochondrial OS=Homo sapiens GN=SCO1 PE=1 SV=1 - [J3QL56_HUMAN]	16.3	2	3	3	3	0	2.75599e+06		0			8.40044	16.3	3	3	270	30.1598	9.56885
O75937	DnaJ homolog subfamily C member 8 OS=Homo sapiens GN=DNAJC8 PE=1 SV=2 - [DNJC8_HUMAN]	16.21	1	3	3	3	0	2.35197e+06		0			4.72847	16.21	3	3	253	29.8234	9.05615
E9PJH7	Mitochondrial glutamate carrier 1 (Fragment) OS=Homo sapiens GN=SLC25A22 PE=1 SV=5 - [E9PJH7_HUMAN]	15.65	7	3	3	3	0	1.82911e+06		0			4.21505	15.65	3	3	313	33.2606	9.67139
A0A087X105	Cell adhesion molecule 1 OS=Homo sapiens GN=CADM1 PE=1 SV=1 - [A0A087X105_HUMAN]	15.55	8	3	3	3	0	863332		0			2.47555	15.55	3	3	373	41.6407	5.0083
G3V3E6	ERO1-like protein alpha OS=Homo sapiens GN=ERO1A PE=1 SV=1 - [G3V3E6_HUMAN]	15.18	4	3	3	3	0	3.16104e+06		0			5.73149	15.18	3	3	257	29.5524	5.21143
Q9UFM8	Neuroplastin (Fragment) OS=Homo sapiens GN=DKFZp566H1924 PE=1 SV=2 - [Q9UFM8_HUMAN]	14.61	3	3	3	3	0	2.26896e+06		0			7.74545	14.61	3	3	308	34.7934	7.72314
C9J6B1	Ras-related protein Ral-B (Fragment) OS=Homo sapiens GN=RALB PE=1 SV=1 - [C9J6B1_HUMAN]	14.37	3	3	3	3	0	1.4703e+06		0			4.36497	14.37	3	3	167	18.7185	4.93213
P32929	Cystathionine gamma-lyase OS=Homo sapiens GN=CTH PE=1 SV=3 - [CGL_HUMAN]	14.32	1	3	3	3	0	2.58142e+06		0			6.99612	14.32	3	3	405	44.4795	6.69775
P61353	60S ribosomal protein L27 OS=Homo sapiens GN=RPL27 PE=1 SV=2 - [RL27_HUMAN]	13.97	4	2	2	3	0	5.78384e+06		0			6.10246	13.97	2	3	136	15.7877	10.5649
Q96A49	Synapse-associated protein 1 OS=Homo sapiens GN=SYAP1 PE=1 SV=1 - [SYAP1_HUMAN]	13.92	1	3	3	3	0	1.33705e+06		0			6.35707	13.92	3	3	352	39.9089	4.52588
Q9UBE0	SUMO-activating enzyme subunit 1 OS=Homo sapiens GN=SAE1 PE=1 SV=1 - [SAE1_HUMAN]	13.87	8	3	3	3	0	2.08317e+06		0			6.92496	13.87	3	3	346	38.4256	5.30029
O96011	Peroxisomal membrane protein 11B OS=Homo sapiens GN=PEX11B PE=1 SV=1 - [PX11B_HUMAN]	13.51	1	3	3	3	0	921397		0			7.72719	13.51	3	3	259	28.4132	9.84717
Q96C86	m7GpppX diphosphatase OS=Homo sapiens GN=DCPS PE=1 SV=2 - [DCPS_HUMAN]	13.35	1	3	3	3	0	1.59254e+06		0			6.26104	13.35	3	3	337	38.585	6.37939
P17612	cAMP-dependent protein kinase catalytic subunit alpha OS=Homo sapiens GN=PRKACA PE=1 SV=2 - [KAPCA_HUMAN]	13.11	4	2	3	3	0	289192		0			2.36703	13.11	3	3	351	40.564	8.79248
Q5TBF5	Mimecan (Fragment) OS=Homo sapiens GN=OGN PE=1 SV=1 - [Q5TBF5_HUMAN]	12.69	2	3	3	3	0	2.98732e+06		0			5.66015	12.69	3	3	268	30.4373	8.33838
A0A087WY82	Junctional adhesion molecule A OS=Homo sapiens GN=F11R PE=1 SV=1 - [A0A087WY82_HUMAN]	12.54	2	2	2	3	0	4.66416e+06		0			7.37715	12.54	2	3	279	30.1783	7.97217
G3XAJ6	Raft-linking protein, isoform CRA_c OS=Homo sapiens GN=RFTN1 PE=1 SV=1 - [G3XAJ6_HUMAN]	11.81	3	3	3	3	0	2.6135e+06		0			4.61476	11.81	3	3	542	58.7261	5.33838
F8WJN3	Cleavage and polyadenylation-specificity factor subunit 6 OS=Homo sapiens GN=CPSF6 PE=1 SV=1 - [F8WJN3_HUMAN]	11.72	2	3	3	3	0	1.31955e+06		0			8.0682	11.72	3	3	478	52.2378	6.43018
K7EQ02	DAZ-associated protein 1 (Fragment) OS=Homo sapiens GN=DAZAP1 PE=1 SV=2 - [K7EQ02_HUMAN]	11.31	4	2	2	3	0	3.48021e+06		0			2.5929	11.31	2	3	327	34.9981	7.85498
Q96Q11	CCA tRNA nucleotidyltransferase 1, mitochondrial OS=Homo sapiens GN=TRNT1 PE=1 SV=2 - [TRNT1_HUMAN]	11.06	3	3	3	3	0	935173		0			4.13201	11.06	3	3	434	50.0961	8.104
A0A087WVJ0	Mucin-1 (Fragment) OS=Homo sapiens GN=MUC1 PE=1 SV=1 - [A0A087WVJ0_HUMAN]	10.96	14	2	2	3	0	1.67381e+06		0			7.50076	10.96	2	3	228	25.5498	6.7124
O14828	Secretory carrier-associated membrane protein 3 OS=Homo sapiens GN=SCAMP3 PE=1 SV=3 - [SCAM3_HUMAN]	10.95	1	3	3	3	0	1.32363e+06		0			4.81166	10.95	3	3	347	38.2623	7.63525
P54577	Tyrosine--tRNA ligase, cytoplasmic OS=Homo sapiens GN=YARS PE=1 SV=4 - [SYYC_HUMAN]	10.61	1	3	3	3	0	817295		0			2.69165	10.61	3	3	528	59.1061	7.04932
P15848	Arylsulfatase B OS=Homo sapiens GN=ARSB PE=1 SV=1 - [ARSB_HUMAN]	9.57	1	3	3	3	0	2.67809e+06		0			8.13287	9.57	3	3	533	59.6494	8.20654
P17540	Creatine kinase S-type, mitochondrial OS=Homo sapiens GN=CKMT2 PE=1 SV=2 - [KCRS_HUMAN]	8.59	4	1	3	3	0	3.98953e+06		0			6.27749	8.59	3	3	419	47.4744	8.19189
Q92901	60S ribosomal protein L3-like OS=Homo sapiens GN=RPL3L PE=2 SV=3 - [RL3L_HUMAN]	8.35	1	1	3	3	0	1.93392e+06		0			7.13091	8.35	3	3	407	46.2669	10.4478
Q8TBC4	NEDD8-activating enzyme E1 catalytic subunit OS=Homo sapiens GN=UBA3 PE=1 SV=2 - [UBA3_HUMAN]	7.99	3	2	2	3	0	2.0712e+06		0			6.78842	7.99	2	3	463	51.8193	5.45264
F5GZ78	Paxillin OS=Homo sapiens GN=PXN PE=1 SV=1 - [F5GZ78_HUMAN]	7.81	5	3	3	3	0	2.11213e+06		0			2.73337	7.81	3	3	589	64.1918	6.354
Q9H488	GDP-fucose protein O-fucosyltransferase 1 OS=Homo sapiens GN=POFUT1 PE=1 SV=1 - [OFUT1_HUMAN]	7.47	1	2	2	3	0	1.469e+06		0			6.91962	7.47	2	3	388	43.9272	8.52881
P12931	Proto-oncogene tyrosine-protein kinase Src OS=Homo sapiens GN=SRC PE=1 SV=3 - [SRC_HUMAN]	7.46	6	3	3	3	0	2.36491e+06		0			7.38011	7.46	3	3	536	59.797	7.41553
B4DKY1	Cysteine--tRNA ligase, cytoplasmic OS=Homo sapiens GN=CARS PE=1 SV=1 - [B4DKY1_HUMAN]	7.17	5	3	3	3	0	524251		0			3.11801	7.17	3	3	739	84.2246	7.04932
Q6UWR7	Ectonucleotide pyrophosphatase/phosphodiesterase family member 6 OS=Homo sapiens GN=ENPP6 PE=1 SV=2 - [ENPP6_HUMAN]	7.05	2	2	2	3	0	1.43045e+06		0			5.78853	7.05	2	3	440	50.2084	7.98682
O14672	Disintegrin and metalloproteinase domain-containing protein 10 OS=Homo sapiens GN=ADAM10 PE=1 SV=1 - [ADA10_HUMAN]	6.95	1	3	3	3	0	1.72787e+06		0			1.96955	6.95	3	3	748	84.0877	7.76709
Q12805	EGF-containing fibulin-like extracellular matrix protein 1 OS=Homo sapiens GN=EFEMP1 PE=1 SV=2 - [FBLN3_HUMAN]	6.9	2	3	3	3	0	1.24705e+06		0			1.72582	6.9	3	3	493	54.6042	5.07178
Q06124	Tyrosine-protein phosphatase non-receptor type 11 OS=Homo sapiens GN=PTPN11 PE=1 SV=2 - [PTN11_HUMAN]	6.87	1	3	3	3	0	1.62132e+06		0			7.39646	6.87	3	3	597	68.3933	7.29834
G5E9S8	Kinesin light chain 1 OS=Homo sapiens GN=KLC1 PE=1 SV=1 - [G5E9S8_HUMAN]	6.56	14	1	3	3	0	1.61451e+06		0			4.70296	6.56	3	3	549	62.4676	5.84619
Q9UHI7	Solute carrier family 23 member 1 OS=Homo sapiens GN=SLC23A1 PE=1 SV=3 - [S23A1_HUMAN]	6.52	2	3	3	3	0	2.61421e+06		0			4.87721	6.52	3	3	598	64.7888	6.59521
P10155	60 kDa SS-A/Ro ribonucleoprotein OS=Homo sapiens GN=TROVE2 PE=1 SV=2 - [RO60_HUMAN]	6.51	1	3	3	3	0	1.12411e+06		0			2.62815	6.51	3	3	538	60.6312	8.03076
Q08AM6	Protein VAC14 homolog OS=Homo sapiens GN=VAC14 PE=1 SV=1 - [VAC14_HUMAN]	5.75	2	3	3	3	0	1.76355e+06		0			4.63531	5.75	3	3	782	87.9167	6.12549
Q9UBN7	Histone deacetylase 6 OS=Homo sapiens GN=HDAC6 PE=1 SV=2 - [HDAC6_HUMAN]	4.94	1	3	3	3	0	1.56844e+06		0			2.99375	4.94	3	3	1215	131.336	5.30029
Q9GZM7	Tubulointerstitial nephritis antigen-like OS=Homo sapiens GN=TINAGL1 PE=1 SV=1 - [TINAL_HUMAN]	4.93	2	2	2	3	0	2.87699e+06		0			4.90407	4.93	2	3	467	52.353	6.99072
A0A0X1KG75	Cordon-bleu protein-like 1 (Fragment) OS=Homo sapiens GN=COBLL1 PE=1 SV=1 - [A0A0X1KG75_HUMAN]	4.88	6	3	3	3	0	1.44659e+06		0			8.40587	4.88	3	3	1168	127.863	6.94678
F8W726	Ubiquitin-associated protein 2-like OS=Homo sapiens GN=UBAP2L PE=1 SV=2 - [F8W726_HUMAN]	4.82	9	3	3	3	0	869407		0			1.87874	4.82	3	3	1079	113.559	6.68311
P48960	CD97 antigen OS=Homo sapiens GN=CD97 PE=1 SV=4 - [CD97_HUMAN]	4.79	1	3	3	3	0	700454		0			3.00861	4.79	3	3	835	91.8091	6.87354
Q8NBF2	NHL repeat-containing protein 2 OS=Homo sapiens GN=NHLRC2 PE=1 SV=1 - [NHLC2_HUMAN]	4.68	1	3	3	3	0	1.19925e+06		0			6.31981	4.68	3	3	726	79.3935	5.5542
E7EQL6	Proline dehydrogenase 1, mitochondrial OS=Homo sapiens GN=PRODH PE=1 SV=1 - [E7EQL6_HUMAN]	4.47	3	2	2	3	0	212305		0			3.69273	4.47	2	3	492	56.2191	6.34131
H3BM21	Integrin beta (Fragment) OS=Homo sapiens PE=3 SV=1 - [H3BM21_HUMAN]	4.45	2	3	3	3	0	972034		0			2.01938	4.45	3	3	787	86.9223	5.09717
Q9NZ08	Endoplasmic reticulum aminopeptidase 1 OS=Homo sapiens GN=ERAP1 PE=1 SV=3 - [ERAP1_HUMAN]	4.25	1	3	3	3	0	2.11371e+06		0			4.81248	4.25	3	3	941	107.166	6.45557
P14543	Nidogen-1 OS=Homo sapiens GN=NID1 PE=1 SV=3 - [NID1_HUMAN]	4.09	1	3	3	3	0	1.50674e+06		0			5.3002	4.09	3	3	1247	136.291	5.2876
O00291	Huntingtin-interacting protein 1 OS=Homo sapiens GN=HIP1 PE=1 SV=5 - [HIP1_HUMAN]	3.66	2	3	3	3	0	886710		0			3.91264	3.66	3	3	1037	116.148	5.30029
E7EW33	Cytoplasmic FMR1-interacting protein 2 OS=Homo sapiens GN=CYFIP2 PE=1 SV=1 - [E7EW33_HUMAN]	2.93	5	1	3	3	0	2.57786e+06		0			4.05061	2.93	3	3	1057	122.38	6.97607
A0A0G2JL47	Large proline-rich protein BAG6 OS=Homo sapiens GN=BAG6 PE=1 SV=1 - [A0A0G2JL47_HUMAN]	2.88	16	3	3	3	0	1.15163e+06		0			3.9654	2.88	3	3	1077	113.395	5.69385
P17301	Integrin alpha-2 OS=Homo sapiens GN=ITGA2 PE=1 SV=1 - [ITA2_HUMAN]	2.79	4	3	3	3	0	1.88564e+06		0			6.74573	2.79	3	3	1181	129.214	5.31299
Q9NPP4	NLR family CARD domain-containing protein 4 OS=Homo sapiens GN=NLRC4 PE=1 SV=2 - [NLRC4_HUMAN]	2.44	1	1	1	3	0	0		0			0	2.44	1	3	1024	116.085	6.771
O75923	Dysferlin OS=Homo sapiens GN=DYSF PE=1 SV=1 - [DYSF_HUMAN]	2.36	1	3	3	3	0	948188		0			4.49892	2.36	3	3	2080	237.144	5.64307
A0A087WY08	Thrombospondin type-1 domain-containing protein 7A OS=Homo sapiens GN=THSD7A PE=1 SV=1 - [A0A087WY08_HUMAN]	2.17	2	3	3	3	0	514229		0			0	2.17	3	3	1657	185.317	7.43018
Q8TCJ2	Dolichyl-diphosphooligosaccharide--protein glycosyltransferase subunit STT3B OS=Homo sapiens GN=STT3B PE=1 SV=1 - [STT3B_HUMAN]	1.94	1	2	2	3	0	1.27983e+06		0			5.9306	1.94	2	3	826	93.6137	8.90967
P11717	Cation-independent mannose-6-phosphate receptor OS=Homo sapiens GN=IGF2R PE=1 SV=3 - [MPRI_HUMAN]	1.32	1	3	3	3	0	1.1008e+06		0			7.25389	1.32	3	3	2491	274.199	5.93506
O95741	Copine-6 OS=Homo sapiens GN=CPNE6 PE=1 SV=3 - [CPNE6_HUMAN]	33.75	20	14	15	24	9.98638e+06	5.10534e+06	45.2908	33.75	15	22	3.77402	1.62	1	2	557	61.9517	5.51611
A0A087X0X3	Heterogeneous nuclear ribonucleoprotein M OS=Homo sapiens GN=HNRNPM PE=1 SV=1 - [A0A087X0X3_HUMAN]	20	11	10	10	14	4.19544e+06	2.02032e+06	18.6859	20	10	12	5.13387	5.21	2	2	730	77.5184	8.77783
P13647	Keratin, type II cytoskeletal 5 OS=Homo sapiens GN=KRT5 PE=1 SV=3 - [K2C5_HUMAN]	15.08	28	4	10	11	1.76825e+07	3.23952e+07	17.8906	14.75	9	9	3.75448	2.71	2	2	590	62.34	7.73779
A0A087WUN7	SRA stem-loop-interacting RNA-binding protein, mitochondrial OS=Homo sapiens GN=SLIRP PE=1 SV=1 - [A0A087WUN7_HUMAN]	52.17	9	4	4	9	6.52575e+06	7.50822e+06	11.5312	52.17	4	7	5.00387	30.43	2	2	92	10.3463	10.228
Q5JTJ3	Cytochrome c oxidase assembly factor 6 homolog OS=Homo sapiens GN=COA6 PE=1 SV=1 - [COA6_HUMAN]	38.4	2	5	5	8	3.2064e+06	7.49377e+06	7.67494	38.4	5	6	4.91718	10.4	1	2	125	14.1069	8.25049
P09601	Heme oxygenase 1 OS=Homo sapiens GN=HMOX1 PE=1 SV=1 - [HMOX1_HUMAN]	26.39	2	6	6	8	1.53309e+06	1.64358e+06	9.99512	25	5	6	5.84395	13.54	2	2	288	32.798	8.25049
Q9HAC7	Succinate--hydroxymethylglutarate CoA-transferase OS=Homo sapiens GN=SUGCT PE=1 SV=2 - [SUCHY_HUMAN]	15.28	2	5	5	8	5.12706e+06	1.98563e+06	13.7497	15.28	5	6	4.09893	5.62	2	2	445	48.431	8.35303
A6NDB9	Paralemmin-3 OS=Homo sapiens GN=PALM3 PE=1 SV=2 - [PALM3_HUMAN]	13.67	2	7	7	8	1.04953e+06	536096	4.4896	11.89	6	6	2.26804	4.31	2	2	673	71.6522	4.52588
P53618	Coatomer subunit beta OS=Homo sapiens GN=COPB1 PE=1 SV=3 - [COPB_HUMAN]	10.07	2	7	7	8	1.49499e+06	821472	9.99641	7.14	5	6	4.83345	2.94	2	2	953	107.074	6.04932
P50135	Histamine N-methyltransferase OS=Homo sapiens GN=HNMT PE=1 SV=1 - [HNMT_HUMAN]	15.75	1	4	4	7	6.99269e+06	9.61909e+06	13.6864	15.75	4	5	5.77347	13.36	2	2	292	33.2736	5.33838
Q15119	[Pyruvate dehydrogenase (acetyl-transferring)] kinase isozyme 2, mitochondrial OS=Homo sapiens GN=PDK2 PE=1 SV=2 - [PDK2_HUMAN]	14.25	6	4	4	7	2.26705e+06	1.88309e+06	8.10969	14.25	4	5	4.40129	7.86	2	2	407	46.1242	6.60986
I3L0N3	Vesicle-fusing ATPase OS=Homo sapiens GN=NSF PE=1 SV=1 - [I3L0N3_HUMAN]	8.25	5	5	5	7	1.23169e+06	2.47539e+06	12.1165	8.25	5	5	5.17527	3.11	2	2	739	82.0398	6.81494
P62316	Small nuclear ribonucleoprotein Sm D2 OS=Homo sapiens GN=SNRPD2 PE=1 SV=1 - [SMD2_HUMAN]	41.53	2	5	5	6	1.28715e+06	944505	3.88076	33.05	4	4	3.89601	16.95	2	2	118	13.5182	9.90576
P60983	Glia maturation factor beta OS=Homo sapiens GN=GMFB PE=1 SV=2 - [GMFB_HUMAN]	21.13	7	3	3	6	1.59674e+06	798524	7.59821	21.13	3	4	3.09792	14.79	2	2	142	16.7025	5.2876
Q96HR9	Receptor expression-enhancing protein 6 OS=Homo sapiens GN=REEP6 PE=1 SV=2 - [REEP6_HUMAN]	14.69	3	3	3	6	4.16225e+06	4.93435e+06	8.307	14.69	3	4	5.06965	10.9	2	2	211	23.4033	8.55811
P41250	Glycine--tRNA ligase OS=Homo sapiens GN=GARS PE=1 SV=3 - [GARS_HUMAN]	11.64	1	5	5	6	1.24212e+06	2.42921e+06	6.15649	8.8	4	4	3.29053	5.55	2	2	739	83.1126	7.03467
Q6PI48	Aspartate--tRNA ligase, mitochondrial OS=Homo sapiens GN=DARS2 PE=1 SV=1 - [SYDM_HUMAN]	11.16	1	5	5	6	1.47783e+06	509576	10.9153	9.3	4	4	5.1774	4.96	2	2	645	73.5161	8.01611
Q96L92	Sorting nexin-27 OS=Homo sapiens GN=SNX27 PE=1 SV=2 - [SNX27_HUMAN]	10.35	2	4	4	6	1.03129e+06	1.17775e+06	5.48768	10.35	4	4	4.1926	6.28	2	2	541	61.2265	6.49365
Q4U2R8	Solute carrier family 22 member 6 OS=Homo sapiens GN=SLC22A6 PE=1 SV=1 - [S22A6_HUMAN]	7.1	2	4	4	6	1.1183e+06	3.69487e+06	4.55964	7.1	4	4	3.55119	3.91	2	2	563	61.776	8.76318
F5H365	Protein transport protein Sec23A OS=Homo sapiens GN=SEC23A PE=1 SV=1 - [F5H365_HUMAN]	6.66	11	4	4	6	932331	1.75129e+06	6.1274	5.03	3	4	2.20564	3.53	2	2	736	82.9156	7.45947
P28288	ATP-binding cassette sub-family D member 3 OS=Homo sapiens GN=ABCD3 PE=1 SV=1 - [ABCD3_HUMAN]	6.22	1	3	3	6	1.57806e+06	1.64224e+06	7.37696	6.22	3	4	5.19099	4.4	2	2	659	75.4276	9.36377
H7BXN9	Solute carrier family 22 (Organic anion transporter), member 8, isoform CRA_a OS=Homo sapiens GN=SLC22A8 PE=1 SV=1 - [H7BXN9_HUMAN]	4.13	2	2	2	6	1.60748e+06	3.58269e+06	8.74446	4.13	2	4	4.56047	1.88	1	2	533	58.6496	8.76318
Q5TD07	Ribosyldihydronicotinamide dehydrogenase [quinone] OS=Homo sapiens GN=NQO2 PE=1 SV=1 - [Q5TD07_HUMAN]	43.01	5	5	5	5	3.7655e+06	6.51434e+06	9.08289	29.02	3	3	1.8324	13.99	2	2	193	21.5238	6.52197
E5RG77	Pyridoxal phosphate-binding protein (Fragment) OS=Homo sapiens GN=PLPBP PE=1 SV=1 - [E5RG77_HUMAN]	37.5	5	5	5	5	1.06378e+06	4.44728e+06	2.24611	24.34	3	3	3.89827	13.16	2	2	152	16.9839	9.51025
P51452	Dual specificity protein phosphatase 3 OS=Homo sapiens GN=DUSP3 PE=1 SV=1 - [DUS3_HUMAN]	29.19	3	4	4	5	2.08272e+06	4.8969e+06	7.17126	19.46	3	3	6.87726	16.22	2	2	185	20.4653	7.79639
A6PVH4	Inositol oxygenase (Fragment) OS=Homo sapiens GN=MIOX PE=1 SV=1 - [A6PVH4_HUMAN]	22.64	3	4	4	5	1.78761e+06	2.3606e+06	2.13869	15.85	3	3	4.45373	12.83	2	2	265	30.8169	5.73193
Q8WUY1	Protein THEM6 OS=Homo sapiens GN=THEM6 PE=1 SV=2 - [THEM6_HUMAN]	22.12	2	3	3	5	1.21115e+06	1.9245e+06	6.20312	9.62	2	3	3.43695	18.27	2	2	208	23.8499	9.5542
A0A087X0R6	Sorting nexin-12 OS=Homo sapiens GN=SNX12 PE=1 SV=1 - [A0A087X0R6_HUMAN]	22.09	2	2	4	5	2.73136e+06	2.16513e+06	6.30581	14.53	3	3	4.0157	12.79	2	2	172	19.813	7.78174
O14561	Acyl carrier protein, mitochondrial OS=Homo sapiens GN=NDUFAB1 PE=1 SV=3 - [ACPM_HUMAN]	21.15	3	2	2	5	4.58143e+06	1.47762e+07	5.78734	21.15	2	3	6.57731	21.15	2	2	156	17.406	4.93213
C9JBI3	Phosphoserine phosphatase (Fragment) OS=Homo sapiens GN=PSPH PE=1 SV=1 - [C9JBI3_HUMAN]	20.32	2	3	3	5	1.26603e+06	1.36601e+06	4.28328	20.32	3	3	4.69309	13.9	2	2	187	20.7318	6.93213
Q9Y2R0	Cytochrome c oxidase assembly factor 3 homolog, mitochondrial OS=Homo sapiens GN=COA3 PE=1 SV=1 - [COA3_HUMAN]	18.87	2	2	2	5	6.98647e+06	1.46519e+07	2.65666	18.87	2	3	4.1411	9.43	1	2	106	11.7241	9.59814
Q15056	Eukaryotic translation initiation factor 4H OS=Homo sapiens GN=EIF4H PE=1 SV=5 - [IF4H_HUMAN]	18.55	1	3	3	5	1.95882e+06	3.96163e+06	6.83555	18.55	3	3	2.14741	12.9	2	2	248	27.3684	7.2251
I3L0W4	Diamine acetyltransferase 2 OS=Homo sapiens GN=SAT2 PE=1 SV=1 - [I3L0W4_HUMAN]	18.38	3	3	3	5	5.57335e+06	4.26164e+06	5.86219	18.38	3	3	3.74205	13.24	2	2	136	15.0468	6.01123
Q9UNZ2	NSFL1 cofactor p47 OS=Homo sapiens GN=NSFL1C PE=1 SV=2 - [NSF1C_HUMAN]	18.11	3	4	4	5	1.9291e+06	3.7998e+06	5.64604	11.89	3	3	5.76915	10.81	2	2	370	40.5483	5.09717
M0QXF7	Myeloid-derived growth factor (Fragment) OS=Homo sapiens GN=MYDGF PE=1 SV=1 - [M0QXF7_HUMAN]	14.29	3	1	1	5	2.56657e+06	5.7543e+06	6.22409	14.29	1	3	5.16607	14.29	1	2	84	9.66357	4.99561
Q9Y5P6	Mannose-1-phosphate guanyltransferase beta OS=Homo sapiens GN=GMPPB PE=1 SV=2 - [GMPPB_HUMAN]	14.17	1	4	4	5	1.01516e+06	3.69629e+06	7.62222	11.39	3	3	3.36053	7.78	2	2	360	39.8086	6.60986
Q9NZL9	Methionine adenosyltransferase 2 subunit beta OS=Homo sapiens GN=MAT2B PE=1 SV=1 - [MAT2B_HUMAN]	12.57	3	4	4	5	3.3502e+06	4.40306e+06	4.39855	10.18	3	3	6.69207	8.98	2	2	334	37.5282	7.35693
H0Y4R1	Inosine-5'-monophosphate dehydrogenase 2 (Fragment) OS=Homo sapiens GN=IMPDH2 PE=1 SV=1 - [H0Y4R1_HUMAN]	9.36	3	3	3	5	769211	1.12763e+06	7.19844	9.36	3	3	5.4585	6.38	2	2	470	51.0352	8.17725
Q86YH6	Decaprenyl-diphosphate synthase subunit 2 OS=Homo sapiens GN=PDSS2 PE=1 SV=2 - [DLP1_HUMAN]	7.52	2	3	3	5	819534	923024	6.58916	7.52	3	3	4.41774	5.01	2	2	399	44.1007	8.23584
Q99962	Endophilin-A1 OS=Homo sapiens GN=SH3GL2 PE=1 SV=1 - [SH3G2_HUMAN]	6.82	4	2	2	5	2.11433e+06	4.4676e+06	2.83194	6.82	2	3	4.46835	3.41	1	2	352	39.9371	5.45264
O15067	Phosphoribosylformylglycinamidine synthase OS=Homo sapiens GN=PFAS PE=1 SV=4 - [PUR4_HUMAN]	4.93	5	4	4	5	466449	2.28033e+06	0	2.84	3	3	2.71171	2.91	2	2	1338	144.643	5.75732
Q9Y678	Coatomer subunit gamma-1 OS=Homo sapiens GN=COPG1 PE=1 SV=1 - [COPG1_HUMAN]	2.63	1	2	2	5	1.41284e+06	1.10417e+06	2.16276	2.63	2	3	2.4092	2.63	2	2	874	97.6555	5.46533
P61960	Ubiquitin-fold modifier 1 OS=Homo sapiens GN=UFM1 PE=1 SV=1 - [UFM1_HUMAN]	58.82	2	2	2	4	4.2231e+06	4.96332e+06	3.54783	17.65	1	2	5.0904	58.82	2	2	85	9.11187	9.30518
K7ENX8	Cold-inducible RNA-binding protein (Fragment) OS=Homo sapiens GN=CIRBP PE=1 SV=2 - [K7ENX8_HUMAN]	45	11	3	3	4	2.16562e+06	7.97375e+06	5.90653	16.25	2	2	6.01738	45	2	2	80	8.90833	4.80518
C9JJ34	Ran-specific GTPase-activating protein (Fragment) OS=Homo sapiens GN=RANBP1 PE=1 SV=1 - [C9JJ34_HUMAN]	41.72	6	3	3	4	2.20112e+06	6.83065e+06	5.65688	27.61	2	2	2.57035	20.86	2	2	163	18.7502	5.21143
R4GNF9	Thiosulfate sulfurtransferase/rhodanese-like domain-containing protein 1 OS=Homo sapiens GN=TSTD1 PE=1 SV=1 - [R4GNF9_HUMAN]	37.1	2	2	2	4	3.83869e+06	9.18343e+06	2.19859	37.1	2	2	2.41699	37.1	2	2	62	7.05348	7.18115
P63167	Dynein light chain 1, cytoplasmic OS=Homo sapiens GN=DYNLL1 PE=1 SV=1 - [DYL1_HUMAN]	37.08	5	2	2	4	2.25405e+06	6.05762e+06	5.58648	24.72	1	2	4.926	37.08	2	2	89	10.3591	7.40088
D6RAN4	60S ribosomal protein L9 (Fragment) OS=Homo sapiens GN=RPL9 PE=1 SV=8 - [D6RAN4_HUMAN]	35.91	5	4	4	4	1.91476e+06	2.61163e+06	2.23128	16.02	2	2	5.06405	19.89	2	2	181	20.7623	10.1987
P07998	Ribonuclease pancreatic OS=Homo sapiens GN=RNASE1 PE=1 SV=4 - [RNAS1_HUMAN]	35.26	2	3	3	4	507990	3.18103e+06	2.15543	28.21	2	2	3.52211	21.79	2	2	156	17.6327	8.79248
Q9Y5J7	Mitochondrial import inner membrane translocase subunit Tim9 OS=Homo sapiens GN=TIMM9 PE=1 SV=1 - [TIM9_HUMAN]	34.83	1	2	2	4	2.36481e+06	2.47756e+06	4.51771	34.83	2	2	4.40273	34.83	2	2	89	10.3711	7.21045
E5RGH8	Proton-coupled amino acid transporter 2 OS=Homo sapiens GN=SLC36A2 PE=1 SV=1 - [E5RGH8_HUMAN]	27.21	3	3	3	4	1.57416e+06	2.49558e+06	4.61351	19.73	2	2	5.97548	27.21	2	2	147	15.9022	8.95361
P36405	ADP-ribosylation factor-like protein 3 OS=Homo sapiens GN=ARL3 PE=1 SV=2 - [ARL3_HUMAN]	26.92	1	3	3	4	2.00096e+06	224187	2.35312	16.48	2	2	4.45951	16.48	2	2	182	20.4428	7.23975
Q9Y5J9	Mitochondrial import inner membrane translocase subunit Tim8 B OS=Homo sapiens GN=TIMM8B PE=1 SV=1 - [TIM8B_HUMAN]	26.51	2	2	2	4	1.33895e+06	1.85199e+06	3.91913	26.51	2	2	4.53744	26.51	2	2	83	9.33754	5.12256
E7EXA3	NIF3-like protein 1 (Fragment) OS=Homo sapiens GN=NIF3L1 PE=1 SV=1 - [E7EXA3_HUMAN]	25.84	5	4	4	4	970787	1.37056e+06	1.96612	9.57	2	2	2.62791	16.27	2	2	209	23.563	7.03467
Q9NWV4	UPF0587 protein C1orf123 OS=Homo sapiens GN=C1orf123 PE=1 SV=1 - [CA123_HUMAN]	25	1	2	2	4	3.02037e+06	1.13659e+07	4.51357	25	2	2	5.17096	25	2	2	160	18.0368	5.0083
F2Z388	60S ribosomal protein L35 OS=Homo sapiens GN=RPL35 PE=1 SV=1 - [F2Z388_HUMAN]	23.96	2	2	2	4	4.18853e+06	4.53317e+06	4.76956	23.96	2	2	4.80263	23.96	2	2	96	10.638	10.2866
A0A0J9YY99	Uncharacterized protein (Fragment) OS=Homo sapiens PE=1 SV=1 - [A0A0J9YY99_HUMAN]	22.22	4	2	3	4	911991	2.70011e+06	4.97893	18.8	2	2	5.85506	22.22	2	2	117	12.9564	8.92432
P13761	HLA class II histocompatibility antigen, DRB1-7 beta chain OS=Homo sapiens GN=HLA-DRB1 PE=1 SV=1 - [2B17_HUMAN]	21.43	6	1	3	4	647453	5.96868e+06	1.60749	12.03	2	2	5.30649	12.78	2	2	266	29.803	7.44482
X6RDA4	Paraspeckle component 1 (Fragment) OS=Homo sapiens GN=PSPC1 PE=1 SV=1 - [X6RDA4_HUMAN]	20.56	2	3	3	4	536696	3.45853e+06	3.1402	16.13	2	2	2.35953	13.71	2	2	248	27.2572	5.45264
H3BPR2	Nucleoside diphosphate kinase OS=Homo sapiens GN=NME3 PE=1 SV=1 - [H3BPR2_HUMAN]	20	2	1	1	4	1.47708e+06	6.72715e+06	1.99873	20	1	2	4.92062	20	1	2	85	9.27759	4.88135
A0A075B7B8	Immunoglobulin heavy variable 3/OR16-12 (non-functional) (Fragment) OS=Homo sapiens GN=IGHV3OR16-12 PE=1 SV=1 - [A0A075B7B8_HUMAN]	18.8	2	1	2	4	1.4176e+06	5.75517e+06	4.08352	18.8	2	2	5.70242	9.4	1	2	117	12.8663	6.50732
C9JXB8	60S ribosomal protein L24 OS=Homo sapiens GN=RPL24 PE=1 SV=1 - [C9JXB8_HUMAN]	18.18	3	2	2	4	2.2835e+06	379447	2.40404	18.18	2	2	5.12262	18.18	2	2	121	14.3598	11.312
P23434	Glycine cleavage system H protein, mitochondrial OS=Homo sapiens GN=GCSH PE=1 SV=2 - [GCSH_HUMAN]	17.34	1	2	2	4	2.17627e+07	1.4538e+07	4.80448	5.78	1	2	6.0549	17.34	2	2	173	18.8726	4.88135
Q96IX5	Up-regulated during skeletal muscle growth protein 5 OS=Homo sapiens GN=USMG5 PE=1 SV=1 - [USMG5_HUMAN]	17.24	1	1	1	4	4.48715e+06	6.49818e+06	2.06386	17.24	1	2	4.67685	17.24	1	2	58	6.45337	9.75928
C9J2Q2	ATP synthase mitochondrial F1 complex assembly factor 2 (Fragment) OS=Homo sapiens GN=ATPAF2 PE=1 SV=1 - [C9J2Q2_HUMAN]	17.07	3	3	3	4	1.70676e+06	1.79375e+06	4.57149	10.73	2	2	3.92745	11.22	2	2	205	23.1378	8.26514
H7C2K6	Band 4.1-like protein 1 (Fragment) OS=Homo sapiens GN=EPB41L1 PE=1 SV=1 - [H7C2K6_HUMAN]	16.04	2	1	3	4	1.64321e+06	2.0837e+06	3.02594	13.06	2	2	0	16.04	2	2	268	29.1438	5.63037
Q6UX53	Methyltransferase-like protein 7B OS=Homo sapiens GN=METTL7B PE=1 SV=2 - [MET7B_HUMAN]	15.98	2	3	3	4	2.08619e+06	4.54447e+06	2.08337	10.25	2	2	0	10.66	2	2	244	27.7563	8.38232
F5H392	Caseinolytic peptidase B protein homolog (Fragment) OS=Homo sapiens GN=CLPB PE=1 SV=1 - [F5H392_HUMAN]	15.44	5	2	2	4	1.83069e+06	2.73551e+06	3.72983	15.44	2	2	4.02571	15.44	2	2	149	16.3253	6.53662
Q00059	Transcription factor A, mitochondrial OS=Homo sapiens GN=TFAM PE=1 SV=1 - [TFAM_HUMAN]	15.04	2	3	3	4	697236	1.77239e+06	1.77465	10.16	2	2	4.47348	8.94	2	2	246	29.0782	9.71533
E9PHS0	LanC-like protein 1 (Fragment) OS=Homo sapiens GN=LANCL1 PE=1 SV=1 - [E9PHS0_HUMAN]	14.29	3	3	3	4	1.12273e+06	2.64427e+06	1.91425	10.2	2	2	2.97584	10.2	2	2	196	22.0282	8.14795
H3BMU1	IST1 homolog (Fragment) OS=Homo sapiens GN=IST1 PE=1 SV=1 - [H3BMU1_HUMAN]	14.08	8	3	3	4	1.61183e+06	3.89827e+06	0	7.77	2	2	4.45851	10.68	2	2	206	23.3605	6.60986
Q10589	Bone marrow stromal antigen 2 OS=Homo sapiens GN=BST2 PE=1 SV=1 - [BST2_HUMAN]	13.89	1	3	3	4	351273	2.45286e+06	2.19034	13.89	2	2	4.36184	13.33	2	2	180	19.7563	5.60498
P24534	Elongation factor 1-beta OS=Homo sapiens GN=EEF1B2 PE=1 SV=3 - [EF1B_HUMAN]	13.78	1	2	2	4	1.59052e+07	2.95856e+07	5.2055	5.78	1	2	6.21826	13.78	2	2	225	24.7483	4.66553
P51553	Isocitrate dehydrogenase [NAD] subunit gamma, mitochondrial OS=Homo sapiens GN=IDH3G PE=1 SV=1 - [IDH3G_HUMAN]	12.72	6	3	3	4	2.62288e+06	3.26234e+06	3.9442	4.58	2	2	1.69828	9.92	2	2	393	42.7671	8.49951
P51571	Translocon-associated protein subunit delta OS=Homo sapiens GN=SSR4 PE=1 SV=1 - [SSRD_HUMAN]	12.14	2	2	2	4	1.32477e+06	4.57821e+06	2.48013	12.14	2	2	4.42508	12.14	2	2	173	18.9866	6.15088
Q9H3N1	Thioredoxin-related transmembrane protein 1 OS=Homo sapiens GN=TMX1 PE=1 SV=1 - [TMX1_HUMAN]	11.79	2	3	3	4	2.07841e+06	3.32371e+06	3.596	7.14	2	2	5.64258	8.93	2	2	280	31.7708	4.98291
F8VRH0	Poly(rC)-binding protein 2 (Fragment) OS=Homo sapiens GN=PCBP2 PE=1 SV=2 - [F8VRH0_HUMAN]	11.61	1	1	3	4	2.66016e+06	1.86463e+06	3.74861	7.74	2	2	2.22921	6.45	2	2	310	32.0154	8.07471
A0A1B0GWC4	Aminomethyltransferase, mitochondrial OS=Homo sapiens GN=AMT PE=1 SV=1 - [A0A1B0GWC4_HUMAN]	11.28	13	3	3	4	2.4184e+06	5.34163e+06	3.04872	5.84	2	2	6.73134	11.28	2	2	257	28.3217	9.87646
I3NI32	Dihydroorotate dehydrogenase (quinone), mitochondrial OS=Homo sapiens GN=DHODH PE=1 SV=1 - [I3NI32_HUMAN]	10.43	5	3	3	4	540436	1.40118e+06	1.82807	6.36	2	2	2.73769	6.36	2	2	393	42.6278	9.59814
Q9Y295	Developmentally-regulated GTP-binding protein 1 OS=Homo sapiens GN=DRG1 PE=1 SV=1 - [DRG1_HUMAN]	10.35	1	3	3	4	0	1.66052e+06	3.46801	7.36	2	2	3.59364	7.08	2	2	367	40.5168	8.89502
P30520	Adenylosuccinate synthetase isozyme 2 OS=Homo sapiens GN=ADSS PE=1 SV=3 - [PURA2_HUMAN]	10.09	1	3	3	4	615801	2.93764e+06	3.97535	5.48	2	2	4.89137	7.02	2	2	456	50.0658	6.55127
P07357	Complement component C8 alpha chain OS=Homo sapiens GN=C8A PE=1 SV=2 - [CO8A_HUMAN]	9.93	1	3	3	4	2.0589e+06	3.04036e+06	0	5.99	2	2	1.65634	6.85	2	2	584	65.121	6.46826
O43615	Mitochondrial import inner membrane translocase subunit TIM44 OS=Homo sapiens GN=TIMM44 PE=1 SV=2 - [TIM44_HUMAN]	9.51	2	3	3	4	1.77902e+06	2.20903e+06	4.90494	5.97	2	2	5.73504	6.42	2	2	452	51.3235	8.32373
B0QYK0	RNA-binding protein EWS OS=Homo sapiens GN=EWSR1 PE=1 SV=1 - [B0QYK0_HUMAN]	9.39	5	3	3	4	1.6155e+06	3.55721e+06	5.44627	6.31	2	2	4.70046	6.96	2	2	618	64.8891	9.37842
Q8IXI1	Mitochondrial Rho GTPase 2 OS=Homo sapiens GN=RHOT2 PE=1 SV=2 - [MIRO2_HUMAN]	9.06	9	4	4	4	1.33411e+06	1.59049e+06	4.82724	4.21	2	2	1.92692	4.85	2	2	618	68.0747	5.85889
P49721	Proteasome subunit beta type-2 OS=Homo sapiens GN=PSMB2 PE=1 SV=1 - [PSB2_HUMAN]	8.96	2	2	2	4	1.31352e+06	5.17355e+06	2.26503	8.96	2	2	3.68482	8.96	2	2	201	22.8217	7.02002
P83881	60S ribosomal protein L36a OS=Homo sapiens GN=RPL36A PE=1 SV=2 - [RL36A_HUMAN]	8.49	5	1	1	4	2.45129e+06	5.9812e+06	1.80906	8.49	1	2	3.60929	8.49	1	2	106	12.4328	10.5796
A0A0U1RQT9	Synaptophysin-like protein 1 (Fragment) OS=Homo sapiens GN=SYPL1 PE=1 SV=1 - [A0A0U1RQT9_HUMAN]	8.15	3	1	1	4	8930362	3.50279e+07	4.70577	8.15	1	2	6.13485	8.15	1	2	135	14.9573	5.77002
Q9H8Y8	Golgi reassembly-stacking protein 2 OS=Homo sapiens GN=GORASP2 PE=1 SV=3 - [GORS2_HUMAN]	7.3	1	2	2	4	1.60206e+06	1.13491e+06	0	2.65	1	2	0	7.3	2	2	452	47.116	4.81787
B7Z7P8	Eukaryotic peptide chain release factor subunit 1 OS=Homo sapiens GN=ETF1 PE=1 SV=1 - [B7Z7P8_HUMAN]	5.44	5	2	2	4	524708	2.23452e+06	1.78219	5.44	2	2	4.55999	5.44	2	2	423	47.4462	5.56689
Q9BVC6	Transmembrane protein 109 OS=Homo sapiens GN=TMEM109 PE=1 SV=1 - [TM109_HUMAN]	4.94	1	1	1	4	7.15442e+06	2.9701e+07	5.17282	4.94	1	2	6.15238	4.94	1	2	243	26.1936	10.4771
O00186	Syntaxin-binding protein 3 OS=Homo sapiens GN=STXBP3 PE=1 SV=2 - [STXB3_HUMAN]	4.9	1	3	3	4	1.02484e+06	2.15297e+06	0	3.21	2	2	4.67392	3.38	2	2	592	67.7208	7.79639
F5GWV6	Solute carrier family 13 member 2 OS=Homo sapiens GN=SLC13A2 PE=1 SV=3 - [F5GWV6_HUMAN]	4.75	2	1	1	4	1.0408e+06	3.2565e+06	0	4.75	1	2	0	4.75	1	2	358	39.2313	6.97607
Q9Y4F1	FERM, RhoGEF and pleckstrin domain-containing protein 1 OS=Homo sapiens GN=FARP1 PE=1 SV=1 - [FARP1_HUMAN]	4.02	5	1	3	4	1.59241e+06	1.03968e+06	3.91679	2.58	2	2	4.6989	2.68	2	2	1045	118.559	8.14795
Q9H993	Protein-glutamate O-methyltransferase OS=Homo sapiens GN=ARMT1 PE=1 SV=1 - [ARMT1_HUMAN]	3.85	1	2	2	4	500914	1.45937e+06	0	3.85	2	2	5.45975	3.85	2	2	441	51.1399	5.75732
P16885	1-phosphatidylinositol 4,5-bisphosphate phosphodiesterase gamma-2 OS=Homo sapiens GN=PLCG2 PE=1 SV=4 - [PLCG2_HUMAN]	3.64	2	4	4	4	300207	1.29932e+06	2.36573	1.66	2	2	4.39272	1.98	2	2	1265	147.776	6.63916
Q14244	Ensconsin OS=Homo sapiens GN=MAP7 PE=1 SV=1 - [MAP7_HUMAN]	2.94	2	2	2	4	365947	951434	2.36893	2.94	2	2	2.29561	2.94	2	2	749	84.0015	9.61279
Q9UIA9	Exportin-7 OS=Homo sapiens GN=XPO7 PE=1 SV=3 - [XPO7_HUMAN]	2.94	3	3	3	4	480991	1.17326e+06	2.01298	2.02	2	2	2.27195	1.93	2	2	1087	123.828	6.31592
O00203	AP-3 complex subunit beta-1 OS=Homo sapiens GN=AP3B1 PE=1 SV=3 - [AP3B1_HUMAN]	2.93	2	2	2	4	1.53563e+06	3.10616e+06	5.10386	2.93	2	2	4.87988	2.93	2	2	1094	121.245	6.03662
E7EX73	Eukaryotic translation initiation factor 4 gamma 1 OS=Homo sapiens GN=EIF4G1 PE=1 SV=1 - [E7EX73_HUMAN]	2.58	9	3	3	4	280041	1.7581e+06	3.93636	1.53	2	2	4.72859	1.81	2	2	1436	158.547	5.21143
Q12756	Kinesin-like protein KIF1A OS=Homo sapiens GN=KIF1A PE=1 SV=2 - [KIF1A_HUMAN]	2.07	6	1	3	4	96400.3	98823.3	2.30081	1.42	2	2	0	1.42	2	2	1690	190.944	6.21436
Q92616	eIF-2-alpha kinase activator GCN1 OS=Homo sapiens GN=GCN1 PE=1 SV=6 - [GCN1_HUMAN]	1.95	1	4	4	4	115816	989121	0	1.16	2	2	1.62294	0.79	2	2	2671	292.572	7.47412
J3KRZ3	Multidrug and toxin extrusion protein 1 (Fragment) OS=Homo sapiens GN=SLC47A1 PE=1 SV=1 - [J3KRZ3_HUMAN]	54.55	4	2	2	3	1.45487e+06	4.87756e+06	0	14.14	1	1	3.69407	54.55	2	2	99	10.9388	7.29834
D6R909	Receptor of-activated protein C kinase 1 OS=Homo sapiens GN=RACK1 PE=1 SV=1 - [D6R909_HUMAN]	53.45	3	1	3	3	0	5.30812e+06	2.24888	20.69	1	1	2.88894	32.76	2	2	116	12.9043	6.78564
C9J8Q1	NFU1 iron-sulfur cluster scaffold homolog, mitochondrial (Fragment) OS=Homo sapiens GN=NFU1 PE=1 SV=1 - [C9J8Q1_HUMAN]	42.71	4	2	2	3	231764	2.37e+06	3.37769	26.04	1	1	5.63271	42.71	2	2	96	10.4361	4.11963
J3KT73	60S ribosomal protein L38 OS=Homo sapiens GN=RPL38 PE=1 SV=1 - [J3KT73_HUMAN]	39.06	4	2	2	3	1.58644e+06	2.57105e+06	2.25954	18.75	1	1	5.82611	39.06	2	2	64	7.56027	9.99365
Q9UDW1	Cytochrome b-c1 complex subunit 9 OS=Homo sapiens GN=UQCR10 PE=1 SV=3 - [QCR9_HUMAN]	38.1	1	2	2	3	1.48439e+06	3.02055e+06	0	26.98	1	1	3.18961	38.1	2	2	63	7.30383	9.46631
B5MC59	Replication protein A 14 kDa subunit OS=Homo sapiens GN=RPA3 PE=1 SV=1 - [B5MC59_HUMAN]	35.37	2	2	2	3	812011	3.31687e+06	0	20.73	1	1	4.1548	35.37	2	2	82	9.16459	4.53857
P04080	Cystatin-B OS=Homo sapiens GN=CSTB PE=1 SV=2 - [CYTB_HUMAN]	33.67	1	2	2	3	1.51812e+06	1.35443e+07	2.2752	12.24	1	1	5.22949	33.67	2	2	98	11.1326	7.56201
P63313	Thymosin beta-10 OS=Homo sapiens GN=TMSB10 PE=1 SV=2 - [TYB10_HUMAN]	31.82	1	1	2	3	3.05572e+06	1.92428e+06	2.67343	31.82	1	1	4.63955	31.82	2	2	44	5.02255	5.36377
E5RGC8	Regulator of microtubule dynamics protein 1 (Fragment) OS=Homo sapiens GN=RMDN1 PE=1 SV=1 - [E5RGC8_HUMAN]	30.53	4	2	2	3	1.29503e+06	2.52239e+06	1.97837	10.53	1	1	2.62009	30.53	2	2	95	10.7705	4.75439
Q9NP97	Dynein light chain roadblock-type 1 OS=Homo sapiens GN=DYNLRB1 PE=1 SV=3 - [DLRB1_HUMAN]	29.17	4	2	2	3	1.09701e+06	6.59895e+06	2.77317	12.5	1	1	4.83996	29.17	2	2	96	10.9147	7.25439
K7EQA1	Programmed cell death protein 5 OS=Homo sapiens GN=PDCD5 PE=1 SV=1 - [K7EQA1_HUMAN]	28.74	3	2	2	3	665168	1.91803e+06	1.95755	14.94	1	1	2.68999	28.74	2	2	87	9.99825	8.99756
O75368	SH3 domain-binding glutamic acid-rich-like protein OS=Homo sapiens GN=SH3BGRL PE=1 SV=1 - [SH3L1_HUMAN]	27.19	1	2	2	3	2.12473e+06	2.42157e+06	2.07731	11.4	1	1	2.0392	27.19	2	2	114	12.7664	5.24951
P01624	Immunoglobulin kappa variable 3-15 OS=Homo sapiens GN=IGKV3-15 PE=1 SV=2 - [KV315_HUMAN]	26.09	5	2	2	3	481502	1.11556e+07	0	18.26	1	1	2.16768	26.09	2	2	115	12.4882	5.18604
F5GXX5	Dolichyl-diphosphooligosaccharide--protein glycosyltransferase subunit DAD1 OS=Homo sapiens GN=DAD1 PE=1 SV=1 - [F5GXX5_HUMAN]	25.88	4	2	2	3	436129	2.09101e+06	2.17953	14.12	1	1	4.81088	25.88	2	2	85	9.5481	7.18115
F8WF48	Translocation protein SEC62 OS=Homo sapiens GN=SEC62 PE=1 SV=1 - [F8WF48_HUMAN]	24.71	3	2	2	3	535732	1.28411e+06	3.40947	14.12	1	1	3.52437	24.71	2	2	85	9.86401	9.48096
P62318	Small nuclear ribonucleoprotein Sm D3 OS=Homo sapiens GN=SNRPD3 PE=1 SV=1 - [SMD3_HUMAN]	24.6	2	2	2	3	600792	459152	1.71644	7.14	1	1	4.89084	24.6	2	2	126	13.9073	10.3159
H7C4E0	Monoglyceride lipase (Fragment) OS=Homo sapiens GN=MGLL PE=1 SV=1 - [H7C4E0_HUMAN]	24.4	6	3	3	3	306890	749393	0	6.7	1	1	2.32126	17.7	2	2	209	23.0033	9.21729
E9PGT6	COP9 signalosome complex subunit 8 OS=Homo sapiens GN=COPS8 PE=1 SV=1 - [E9PGT6_HUMAN]	23.12	3	2	2	3	1.03948e+06	2.51927e+06	0	8.09	1	1	2.5151	23.12	2	2	173	19.3319	5.52881
M0QY35	17-beta-hydroxysteroid dehydrogenase 14 (Fragment) OS=Homo sapiens GN=HSD17B14 PE=1 SV=1 - [M0QY35_HUMAN]	22.73	4	2	2	3	0	2.44297e+06	1.69164	6.82	1	1	5.17396	22.73	2	2	176	19.0288	8.01611
O14957	Cytochrome b-c1 complex subunit 10 OS=Homo sapiens GN=UQCR11 PE=3 SV=1 - [QCR10_HUMAN]	21.43	1	1	1	3	986422	1.43904e+07	2.52352	21.43	1	1	2.8736	21.43	1	2	56	6.56548	9.87646
Q99598	Translin-associated protein X OS=Homo sapiens GN=TSNAX PE=1 SV=1 - [TSNAX_HUMAN]	19.66	5	3	3	3	302791	2.6811e+06	0	6.21	1	1	3.19381	13.45	2	2	290	33.0917	6.55127
J3KSY6	5'(3')-deoxyribonucleotidase, cytosolic type OS=Homo sapiens GN=NT5C PE=1 SV=1 - [J3KSY6_HUMAN]	19.13	4	2	2	3	512731	4.41699e+06	1.97732	7.83	1	1	6.06257	19.13	2	2	115	13.61	7.09326
H7C3P7	Ras-related protein Ral-A (Fragment) OS=Homo sapiens GN=RALA PE=1 SV=1 - [H7C3P7_HUMAN]	18.9	2	2	2	3	582604	1.74895e+06	2.40323	9.15	1	1	7.32306	18.9	2	2	164	18.359	4.70361
A8MXL6	Protein SEC13 homolog OS=Homo sapiens GN=SEC13 PE=1 SV=1 - [A8MXL6_HUMAN]	17.96	4	3	3	3	3.14116e+06	3.69974e+06	0	3.87	1	1	4.60843	14.08	2	2	284	31.5753	5.8208
M0QZP4	Branched-chain-amino-acid aminotransferase OS=Homo sapiens GN=BCAT2 PE=1 SV=1 - [M0QZP4_HUMAN]	17.57	5	2	2	3	0	3.41384e+06	2.30666	5.75	1	1	3.21642	17.57	2	2	313	34.8752	6.97607
Q9Y2Q5	Ragulator complex protein LAMTOR2 OS=Homo sapiens GN=LAMTOR2 PE=1 SV=1 - [LTOR2_HUMAN]	16.8	1	2	2	3	1.44685e+06	2.89158e+06	1.89685	9.6	1	1	4.68923	16.8	2	2	125	13.4989	5.40186
Q9Y3D6	Mitochondrial fission 1 protein OS=Homo sapiens GN=FIS1 PE=1 SV=2 - [FIS1_HUMAN]	15.79	1	2	2	3	7.95772e+06	5.2376e+06	2.45657	8.55	1	1	6.33323	15.79	2	2	152	16.927	8.79248
O14579	Coatomer subunit epsilon OS=Homo sapiens GN=COPE PE=1 SV=3 - [COPE_HUMAN]	15.58	3	2	2	3	2.02981e+06	1.98008e+06	2.79795	6.49	1	1	0	15.58	2	2	308	34.4603	5.12256
Q9BW30	Tubulin polymerization-promoting protein family member 3 OS=Homo sapiens GN=TPPP3 PE=1 SV=1 - [TPPP3_HUMAN]	15.34	1	2	2	3	1.65603e+06	1.0601e+07	1.64051	7.39	1	1	5.24213	15.34	2	2	176	18.9736	9.12939
H7C488	Leucine zipper transcription factor-like protein 1 (Fragment) OS=Homo sapiens GN=LZTFL1 PE=1 SV=1 - [H7C488_HUMAN]	15.32	2	3	3	3	2.98818e+06	1.43718e+06	0	4.26	1	1	4.20457	11.06	2	2	235	26.889	4.98291
P06730	Eukaryotic translation initiation factor 4E OS=Homo sapiens GN=EIF4E PE=1 SV=2 - [IF4E_HUMAN]	15.21	2	3	3	3	3.24518e+06	2.87239e+06	0	6.45	1	1	4.39999	8.76	2	2	217	25.0815	6.15088
H3BN98	Uncharacterized protein (Fragment) OS=Homo sapiens PE=4 SV=2 - [H3BN98_HUMAN]	15.19	9	3	3	3	0	1.96118e+06	1.98677	3.8	1	1	6.35159	11.39	2	2	237	27.1504	9.5542
A0A0B4J1V6	Immunoglobulin heavy variable 3-73 OS=Homo sapiens GN=IGHV3-73 PE=3 SV=1 - [HV373_HUMAN]	15.13	4	1	2	3	1.63252e+06	2.31882e+06	1.81695	5.88	1	1	1.86363	15.13	2	2	119	12.8494	9.17334
H0YLA2	Signal recognition particle 14 kDa protein OS=Homo sapiens GN=SRP14 PE=1 SV=1 - [H0YLA2_HUMAN]	14.78	2	2	2	3	232641	1.03449e+06	2.22051	11.3	1	1	5.3803	14.78	2	2	115	13.0498	9.56885
A0A087WTL4	Bcl-2-like protein 13 OS=Homo sapiens GN=BCL2L13 PE=1 SV=1 - [A0A087WTL4_HUMAN]	14.75	3	3	3	3	382087	6.12691e+06	0	3.47	1	1	4.98595	11.28	2	2	461	48.8416	4.53857
Q86V81	THO complex subunit 4 OS=Homo sapiens GN=ALYREF PE=1 SV=3 - [THOC4_HUMAN]	14.4	2	2	2	3	1.98119e+06	4.9348e+06	2.01778	4.28	1	1	5.1419	14.4	2	2	257	26.8716	11.1509
C9J2I0	Arf-GAP domain and FG repeat-containing protein 1 (Fragment) OS=Homo sapiens GN=AGFG1 PE=1 SV=8 - [C9J2I0_HUMAN]	14.35	3	2	2	3	305900	1.59729e+06	0	4.64	1	1	4.05073	14.35	2	2	237	25.3804	8.98291
K7EM09	Transmembrane protein 205 (Fragment) OS=Homo sapiens GN=TMEM205 PE=1 SV=1 - [K7EM09_HUMAN]	14.17	4	1	1	3	8.63778e+06	2.79126e+07	2.73952	14.17	1	1	5.73212	14.17	1	2	120	13.3807	8.104
A0A075B6K5	HCG2043239 (Fragment) OS=Homo sapiens GN=IGLV3-9 PE=1 SV=1 - [A0A075B6K5_HUMAN]	13.91	2	1	1	3	678510	1.07342e+07	2.07191	13.91	1	1	3.93388	13.91	1	2	115	12.3241	7.38623
K7EPL2	SUMO-activating enzyme subunit 2 (Fragment) OS=Homo sapiens GN=UBA2 PE=1 SV=2 - [K7EPL2_HUMAN]	13.74	4	2	2	3	905322	2.80529e+06	0	8.02	1	1	5.79387	13.74	2	2	262	29.3669	6.41748
J3QLR8	28S ribosomal protein S23, mitochondrial OS=Homo sapiens GN=MRPS23 PE=1 SV=1 - [J3QLR8_HUMAN]	13.16	2	2	2	3	507666	1.30663e+06	0	6.58	1	1	4.14771	13.16	2	2	152	17.5064	9.62744
E5RJR5	S-phase kinase-associated protein 1 OS=Homo sapiens GN=SKP1 PE=1 SV=1 - [E5RJR5_HUMAN]	12.88	2	2	2	3	776758	1.18522e+06	2.3993	7.36	1	1	5.04024	12.88	2	2	163	18.7083	4.70361
Q5T8U5	Surfeit 4 OS=Homo sapiens GN=SURF4 PE=1 SV=1 - [Q5T8U5_HUMAN]	12.37	3	2	2	3	98146.8	1.35524e+06	1.6392	6.99	1	1	1.88434	12.37	2	2	186	21.1137	6.52197
Q9H6K4	Optic atrophy 3 protein OS=Homo sapiens GN=OPA3 PE=1 SV=1 - [OPA3_HUMAN]	12.29	2	3	3	3	564372	2.34995e+06	1.83718	4.47	1	1	3.53103	7.82	2	2	179	19.9835	8.90967
Q01085	Nucleolysin TIAR OS=Homo sapiens GN=TIAL1 PE=1 SV=1 - [TIAR_HUMAN]	11.47	10	3	3	3	588862	3.61818e+06	1.90284	2.93	1	1	4.76336	8.53	2	2	375	41.5641	7.73779
P60468	Protein transport protein Sec61 subunit beta OS=Homo sapiens GN=SEC61B PE=1 SV=2 - [SC61B_HUMAN]	11.46	1	1	1	3	453043	1.02477e+06	1.76675	11.46	1	1	4.02688	11.46	1	2	96	9.9681	11.561
P07711	Cathepsin L1 OS=Homo sapiens GN=CTSL PE=1 SV=2 - [CATL1_HUMAN]	11.11	1	2	2	3	2.83981e+06	9.06327e+06	1.87611	4.2	1	1	5.40205	11.11	2	2	333	37.5397	5.45264
C9JDR0	Sterol-4-alpha-carboxylate 3-dehydrogenase, decarboxylating (Fragment) OS=Homo sapiens GN=NSDHL PE=1 SV=1 - [C9JDR0_HUMAN]	11.02	2	2	2	3	290566	1.32041e+06	0	3.54	1	1	0	11.02	2	2	254	28.1284	6.53662
Q8WV74	Nucleoside diphosphate-linked moiety X motif 8 OS=Homo sapiens GN=NUDT8 PE=1 SV=2 - [NUDT8_HUMAN]	11.02	1	2	2	3	581733	1.54087e+06	2.06681	4.24	1	1	4.79846	11.02	2	2	236	25.3543	8.41162
G3V158	2-deoxyribose-5-phosphate aldolase homolog (C. elegans), isoform CRA_a OS=Homo sapiens GN=DERA PE=1 SV=1 - [G3V158_HUMAN]	10.87	6	2	2	3	279878	1.66735e+06	2.53611	5.22	1	1	5.24862	10.87	2	2	230	25.0971	8.1626
Q9Y5Z4	Heme-binding protein 2 OS=Homo sapiens GN=HEBP2 PE=1 SV=1 - [HEBP2_HUMAN]	10.73	1	2	2	3	1.63248e+06	5.40798e+06	0	4.88	1	1	4.99511	10.73	2	2	205	22.8612	4.62744
F8VR84	UPF0160 protein MYG1, mitochondrial OS=Homo sapiens GN=C12orf10 PE=1 SV=1 - [F8VR84_HUMAN]	10.33	3	2	2	3	1.97965e+06	1.45579e+06	2.34042	4.69	1	1	5.30605	10.33	2	2	213	24.043	5.38916
Q96I59	Probable asparagine--tRNA ligase, mitochondrial OS=Homo sapiens GN=NARS2 PE=1 SV=3 - [SYNM_HUMAN]	10.06	2	2	2	3	287426	1.42374e+06	2.52207	3.98	1	1	4.59156	10.06	2	2	477	54.0557	7.23975
E2QRB9	Thioredoxin reductase 1, cytoplasmic OS=Homo sapiens GN=TXNRD1 PE=1 SV=2 - [E2QRB9_HUMAN]	10	12	2	3	3	2.88544e+06	6.49092e+06	0	3.26	1	1	6.27174	6.74	2	2	460	50.6909	6.62451
A0A096LNY6	Adenylosuccinate lyase (Fragment) OS=Homo sapiens GN=ADSL PE=1 SV=1 - [A0A096LNY6_HUMAN]	10	10	2	2	3	846246	1.73524e+06	0	3.06	1	1	0	10	2	2	360	40.91	7.6792
P59665	Neutrophil defensin 1 OS=Homo sapiens GN=DEFA1 PE=1 SV=1 - [DEF1_HUMAN]	9.57	2	1	1	3	4.15435e+06	1.23661e+07	2.32845	9.57	1	1	4.70172	9.57	1	2	94	10.1942	6.99072
P47914	60S ribosomal protein L29 OS=Homo sapiens GN=RPL29 PE=1 SV=2 - [RL29_HUMAN]	9.43	1	1	1	3	8.48277e+06	1.05537e+07	2.40779	9.43	1	1	5.89093	9.43	1	2	159	17.7411	11.6636
Q7Z4I7	LIM and senescent cell antigen-like-containing domain protein 2 OS=Homo sapiens GN=LIMS2 PE=1 SV=1 - [LIMS2_HUMAN]	9.38	2	1	3	3	735660	1.13239e+06	1.62662	2.93	1	1	4.61922	6.45	2	2	341	38.8896	8.04541
Q9NQ84	G-protein coupled receptor family C group 5 member C OS=Homo sapiens GN=GPRC5C PE=1 SV=2 - [GPC5C_HUMAN]	9.07	4	3	3	3	130806	768513	0	2.04	1	1	0	7.03	2	2	441	48.1617	8.42627
Q63HM1	Kynurenine formamidase OS=Homo sapiens GN=AFMID PE=2 SV=2 - [KFA_HUMAN]	8.91	1	2	2	3	105430	518864	0	4.95	1	1	4.56714	8.91	2	2	303	33.9701	5.90967
Q9Y6G9	Cytoplasmic dynein 1 light intermediate chain 1 OS=Homo sapiens GN=DYNC1LI1 PE=1 SV=3 - [DC1L1_HUMAN]	8.8	2	3	3	3	1.0382e+06	635137	0	2.29	1	1	5.09822	6.5	2	2	523	56.544	6.41748
O75886	Signal transducing adapter molecule 2 OS=Homo sapiens GN=STAM2 PE=1 SV=1 - [STAM2_HUMAN]	8.76	2	3	3	3	976881	1.17286e+06	1.90769	1.9	1	1	0	6.86	2	2	525	58.1277	5.07178
O95810	Serum deprivation-response protein OS=Homo sapiens GN=SDPR PE=1 SV=3 - [SDPR_HUMAN]	8.71	1	3	3	3	834610	2.24839e+06	2.01112	2.12	1	1	0	6.59	2	2	425	47.1446	5.21143
H7C386	ADP-ribose pyrophosphatase, mitochondrial (Fragment) OS=Homo sapiens GN=NUDT9 PE=1 SV=1 - [H7C386_HUMAN]	8.45	4	2	2	3	789965	1.12029e+06	2.32139	4.58	1	1	4.80804	8.45	2	2	284	31.52	8.63135
A0A0C4DGU3	Minor histocompatibility antigen H13 OS=Homo sapiens GN=HM13 PE=1 SV=1 - [A0A0C4DGU3_HUMAN]	8.39	3	1	1	3	284353	1.38066e+06	1.7434	8.39	1	1	3.56572	8.39	1	2	143	15.422	8.03076
A0A0C4DGE4	Syntaxin-3 (Fragment) OS=Homo sapiens GN=STX3 PE=1 SV=1 - [A0A0C4DGE4_HUMAN]	8.33	3	2	2	3	1.26832e+06	2.09379e+06	2.14485	4.41	1	1	4.8893	8.33	2	2	204	23.2285	6.43018
Q9NT62	Ubiquitin-like-conjugating enzyme ATG3 OS=Homo sapiens GN=ATG3 PE=1 SV=1 - [ATG3_HUMAN]	8.28	2	2	2	3	699163	711654	0	4.14	1	1	4.9468	8.28	2	2	314	35.8415	4.7417
E7ENH5	Copine-1 OS=Homo sapiens GN=CPNE1 PE=1 SV=1 - [E7ENH5_HUMAN]	7.96	15	3	3	3	965249	1.75554e+06	1.92072	2.11	1	1	0	5.85	2	2	427	47.1441	5.93506
Q8NC51	Plasminogen activator inhibitor 1 RNA-binding protein OS=Homo sapiens GN=SERBP1 PE=1 SV=2 - [PAIRB_HUMAN]	7.84	1	2	2	3	800625	1.79288e+06	2.33329	3.92	1	1	2.79387	7.84	2	2	408	44.9385	8.646
O15127	Secretory carrier-associated membrane protein 2 OS=Homo sapiens GN=SCAMP2 PE=1 SV=2 - [SCAM2_HUMAN]	7.6	5	2	2	3	1.4611e+06	5.11327e+06	2.6856	3.65	1	1	6.36842	7.6	2	2	329	36.6253	6.1001
O00142	Thymidine kinase 2, mitochondrial OS=Homo sapiens GN=TK2 PE=1 SV=4 - [KITM_HUMAN]	7.55	4	2	2	3	216337	842307	0	2.64	1	1	3.86663	7.55	2	2	265	30.9848	8.45557
B0QY90	Eukaryotic translation initiation factor 3 subunit L OS=Homo sapiens GN=EIF3L PE=1 SV=1 - [B0QY90_HUMAN]	7.51	3	2	2	3	715234	2.50254e+06	0	3.43	1	1	4.28551	7.51	2	2	466	55.126	8.95361
C9J0D1	Histone H2A OS=Homo sapiens GN=H2AFV PE=1 SV=1 - [C9J0D1_HUMAN]	7.38	18	1	1	3	3.56038e+06	9.48101e+06	2.59931	7.38	1	1	5.25445	7.38	1	2	122	13.155	9.99365
A0A0J9YWM3	Solute carrier family 22 member 18 OS=Homo sapiens GN=SLC22A18 PE=1 SV=1 - [A0A0J9YWM3_HUMAN]	7.36	4	2	2	3	1.78692e+06	2.98941e+06	1.82492	3.68	1	1	3.8896	7.36	2	2	326	34.9017	9.53955
Q16401	26S proteasome non-ATPase regulatory subunit 5 OS=Homo sapiens GN=PSMD5 PE=1 SV=3 - [PSMD5_HUMAN]	7.34	2	3	3	3	1.04644e+06	2.15344e+06	2.12379	1.79	1	1	4.9836	5.56	2	2	504	56.1604	5.47803
P18428	Lipopolysaccharide-binding protein OS=Homo sapiens GN=LBP PE=1 SV=3 - [LBP_HUMAN]	7.07	1	2	2	3	341174	1.27549e+06	0	2.29	1	1	5.65113	7.07	2	2	481	53.3499	6.69775
Q01459	Di-N-acetylchitobiase OS=Homo sapiens GN=CTBS PE=1 SV=1 - [DIAC_HUMAN]	7.01	1	2	2	3	432783	1.32892e+06	0	4.94	1	1	0	7.01	2	2	385	43.7316	6.63916
Q99611	Selenide, water dikinase 2 OS=Homo sapiens GN=SEPHS2 PE=1 SV=3 - [SPS2_HUMAN]	6.7	1	2	2	3	826457	2.25404e+06	2.31084	3.35	1	1	6.15829	6.7	2	2	448	47.2757	5.88428
Q15120	[Pyruvate dehydrogenase (acetyl-transferring)] kinase isozyme 3, mitochondrial OS=Homo sapiens GN=PDK3 PE=1 SV=1 - [PDK3_HUMAN]	6.65	1	2	2	3	1.19625e+06	960661	2.95435	2.71	1	1	2.03466	6.65	2	2	406	46.9091	8.36768
A6NDG6	Glycerol-3-phosphate phosphatase OS=Homo sapiens GN=PGP PE=1 SV=1 - [PGP_HUMAN]	6.23	1	2	2	3	766313	1.48807e+06	1.84309	3.12	1	1	1.81307	6.23	2	2	321	33.9845	6.13818
M0QWZ7	Serine--tRNA ligase, mitochondrial OS=Homo sapiens GN=SARS2 PE=1 SV=1 - [M0QWZ7_HUMAN]	6.18	6	2	2	3	1.20126e+06	2.49943e+06	1.93248	3.09	1	1	2.67802	6.18	2	2	518	58.1458	8.27979
Q96IJ6	Mannose-1-phosphate guanyltransferase alpha OS=Homo sapiens GN=GMPPA PE=1 SV=1 - [GMPPA_HUMAN]	5.95	2	2	2	3	396890	1.61892e+06	1.96918	2.62	1	1	4.54612	5.95	2	2	420	46.2621	7.21045
Q14258	E3 ubiquitin/ISG15 ligase TRIM25 OS=Homo sapiens GN=TRIM25 PE=1 SV=2 - [TRI25_HUMAN]	5.56	1	2	2	3	1.01982e+06	786115	2.52096	2.7	1	1	5.68406	5.56	2	2	630	70.9277	8.08936
P05154	Plasma serine protease inhibitor OS=Homo sapiens GN=SERPINA5 PE=1 SV=3 - [IPSP_HUMAN]	5.42	3	2	2	3	511519	1.31477e+06	1.61177	2.71	1	1	4.09496	5.42	2	2	406	45.6457	9.26123
H0YDU8	Serine/threonine-protein phosphatase (Fragment) OS=Homo sapiens GN=PPP5C PE=1 SV=1 - [H0YDU8_HUMAN]	5.15	3	2	2	3	0	3.20412e+06	2.06292	2.68	1	1	5.44293	5.15	2	2	485	55.1714	6.20166
P04839	Cytochrome b-245 heavy chain OS=Homo sapiens GN=CYBB PE=1 SV=2 - [CY24B_HUMAN]	4.91	1	2	2	3	113998	847224	1.77776	1.93	1	1	1.68936	4.91	2	2	570	65.2936	8.63135
P09874	Poly [ADP-ribose] polymerase 1 OS=Homo sapiens GN=PARP1 PE=1 SV=4 - [PARP1_HUMAN]	4.83	1	3	3	3	539950	1.18209e+06	2.54694	1.28	1	1	5.31999	3.55	2	2	1014	113.012	8.88037
Q96JB5	CDK5 regulatory subunit-associated protein 3 OS=Homo sapiens GN=CDK5RAP3 PE=1 SV=2 - [CK5P3_HUMAN]	4.74	5	2	2	3	333473	922366	2.30425	2.77	1	1	1.96924	4.74	2	2	506	56.885	4.75439
P17813	Endoglin OS=Homo sapiens GN=ENG PE=1 SV=2 - [EGLN_HUMAN]	4.26	2	2	2	3	608588	2.99041e+06	1.97304	1.82	1	1	2.70162	4.26	2	2	658	70.5331	6.60986
Q93009	Ubiquitin carboxyl-terminal hydrolase 7 OS=Homo sapiens GN=USP7 PE=1 SV=2 - [UBP7_HUMAN]	4.17	3	3	3	3	77263.2	286510	0	1.72	1	1	1.65654	2.45	2	2	1102	128.22	5.5542
Q6UX71	Plexin domain-containing protein 2 OS=Homo sapiens GN=PLXDC2 PE=1 SV=1 - [PXDC2_HUMAN]	3.97	1	2	2	3	170173	653225	1.94294	1.89	1	1	1.64239	3.97	2	2	529	59.5455	6.45557
Q03252	Lamin-B2 OS=Homo sapiens GN=LMNB2 PE=1 SV=4 - [LMNB2_HUMAN]	3.87	1	2	2	3	0	0	1.99783	1.61	1	1	2.31956	3.87	2	2	620	69.9057	5.59229
A0A087X0S5	Collagen alpha-1(VI) chain OS=Homo sapiens GN=COL6A1 PE=1 SV=1 - [A0A087X0S5_HUMAN]	3.61	2	2	2	3	371396	576990	0	1.36	1	1	2.23743	3.61	2	2	1026	108.272	5.42725
Q9BSJ8	Extended synaptotagmin-1 OS=Homo sapiens GN=ESYT1 PE=1 SV=1 - [ESYT1_HUMAN]	3.35	1	2	2	3	482570	2.58334e+06	1.95906	1.18	1	1	4.92571	3.35	2	2	1104	122.78	5.8335
E9PB90	Hexokinase-2 OS=Homo sapiens GN=HK2 PE=1 SV=1 - [E9PB90_HUMAN]	3.04	2	1	3	3	1.97494e+07	1.29714e+06	2.25837	0.9	1	1	2.70972	2.14	2	2	889	98.9088	6.03662
Q92504	Zinc transporter SLC39A7 OS=Homo sapiens GN=SLC39A7 PE=1 SV=2 - [S39A7_HUMAN]	2.99	1	1	1	3	121789	1.34081e+06	2.27078	2.99	1	1	2.35839	2.99	1	2	469	50.0873	6.87354
Q9H0U3	Magnesium transporter protein 1 OS=Homo sapiens GN=MAGT1 PE=1 SV=1 - [MAGT1_HUMAN]	2.69	2	1	1	3	504768	2.57719e+06	1.8427	2.69	1	1	1.63972	2.69	1	2	335	38.0114	9.62744
H9KV28	Protein diaphanous homolog 1 OS=Homo sapiens GN=DIAPH1 PE=1 SV=2 - [H9KV28_HUMAN]	2.69	5	3	3	3	86396.1	213301	0	1.06	1	1	0	1.63	2	2	1228	136.765	5.23682
P14735	Insulin-degrading enzyme OS=Homo sapiens GN=IDE PE=1 SV=4 - [IDE_HUMAN]	2.65	1	2	2	3	69268.3	646468	2.09378	1.18	1	1	3.75863	2.65	2	2	1019	117.893	6.60986
H7BXI1	Extended synaptotagmin-2 (Fragment) OS=Homo sapiens GN=ESYT2 PE=1 SV=1 - [H7BXI1_HUMAN]	2.6	3	2	2	3	89810.7	1.12632e+06	1.9653	1.58	1	1	2.04854	2.6	2	2	884	97.9487	8.57275
Q9H330	Transmembrane protein 245 OS=Homo sapiens GN=TMEM245 PE=1 SV=2 - [TM245_HUMAN]	2.52	2	2	2	3	306312	969953	0	1.43	1	1	0	2.52	2	2	911	100.881	8.86572
Q5T1M5	FK506-binding protein 15 OS=Homo sapiens GN=FKBP15 PE=1 SV=2 - [FKB15_HUMAN]	2.38	2	2	2	3	258875	699070	0	1.15	1	1	3.79225	2.38	2	2	1219	133.547	5.19873
P32004	Neural cell adhesion molecule L1 OS=Homo sapiens GN=L1CAM PE=1 SV=2 - [L1CAM_HUMAN]	1.91	1	2	2	3	405580	850927	2.28834	1.11	1	1	4.83107	1.91	2	2	1257	139.915	6.23975
P02462	Collagen alpha-1(IV) chain OS=Homo sapiens GN=COL4A1 PE=1 SV=3 - [CO4A1_HUMAN]	1.86	1	2	2	3	287079	2.70704e+07	3.62679	0.9	1	1	6.25935	1.86	2	2	1669	160.514	8.27979
Q709C8	Vacuolar protein sorting-associated protein 13C OS=Homo sapiens GN=VPS13C PE=1 SV=1 - [VP13C_HUMAN]	0.67	1	2	2	3	209721	1.10483e+06	1.8691	0.35	1	1	4.92533	0.67	2	2	3753	422.124	6.82959
K7EIR2	MICOS complex subunit MIC13 OS=Homo sapiens GN=C19orf70 PE=1 SV=1 - [K7EIR2_HUMAN]	69.32	4	2	2	2	0	7.05508e+06		0			0	69.32	2	2	88	9.69403	8.76318
H3BV07	TBC1 domain family member 24 (Fragment) OS=Homo sapiens GN=TBC1D24 PE=4 SV=8 - [H3BV07_HUMAN]	41.51	5	2	2	2	0	2.02581e+06		0			2.59333	41.51	2	2	53	5.9819	5.93506
C9J4Z3	60S ribosomal protein L37a OS=Homo sapiens GN=RPL37A PE=1 SV=1 - [C9J4Z3_HUMAN]	38.24	8	2	2	2	0	8.24819e+06		0			2.96004	38.24	2	2	68	7.61894	10.0083
A0A0J9YX89	Selenoprotein F (Fragment) OS=Homo sapiens GN=SELENOF PE=1 SV=1 - [A0A0J9YX89_HUMAN]	31.82	7	2	2	2	0	3.98262e+06		0			0	31.82	2	2	88	10.1799	4.99561
H7C2P7	39S ribosomal protein L23, mitochondrial (Fragment) OS=Homo sapiens GN=MRPL23 PE=1 SV=1 - [H7C2P7_HUMAN]	31.36	5	2	2	2	0	2.99912e+06		0			4.87039	31.36	2	2	118	13.7704	10.4185
P84090	Enhancer of rudimentary homolog OS=Homo sapiens GN=ERH PE=1 SV=1 - [ERH_HUMAN]	30.77	2	2	2	2	0	4.23948e+06		0			2.83427	30.77	2	2	104	12.251	5.92236
K7EMY7	Haloacid dehalogenase-like hydrolase domain-containing protein 2 (Fragment) OS=Homo sapiens GN=HDHD2 PE=1 SV=1 - [K7EMY7_HUMAN]	28.77	4	2	2	2	0	4.56469e+06		0			6.33088	28.77	2	2	146	16.4028	8.1626
P62314	Small nuclear ribonucleoprotein Sm D1 OS=Homo sapiens GN=SNRPD1 PE=1 SV=1 - [SMD1_HUMAN]	28.57	2	2	2	2	0	4.15362e+06		0			5.80798	28.57	2	2	119	13.2734	11.561
P15090	Fatty acid-binding protein, adipocyte OS=Homo sapiens GN=FABP4 PE=1 SV=3 - [FABP4_HUMAN]	27.27	1	2	2	2	0	982369		0			3.08648	27.27	2	2	132	14.7095	7.13721
E9PL40	Tetraspanin-18 (Fragment) OS=Homo sapiens GN=TSPAN18 PE=1 SV=1 - [E9PL40_HUMAN]	24.64	3	1	1	2	0	1.18288e+06		0			0	24.64	1	2	138	15.9599	4.81787
H0YNX7	GTP cyclohydrolase 1 feedback regulatory protein OS=Homo sapiens GN=GCHFR PE=1 SV=1 - [H0YNX7_HUMAN]	23.88	2	1	1	2	0	4.22967e+06		0			0	23.88	1	2	67	7.76189	6.52197
S4R406	Sorbin and SH3 domain-containing protein 1 (Fragment) OS=Homo sapiens GN=SORBS1 PE=1 SV=8 - [S4R406_HUMAN]	22.76	2	2	2	2	0	383569		0			0	22.76	2	2	145	15.0743	5.94775
O95881	Thioredoxin domain-containing protein 12 OS=Homo sapiens GN=TXNDC12 PE=1 SV=1 - [TXD12_HUMAN]	22.67	1	2	2	2	0	1.68847e+06		0			2.20373	22.67	2	2	172	19.1936	5.40186
L0R6Q1	SLC35A4 upstream open reading frame protein OS=Homo sapiens GN=SLC35A4 PE=3 SV=1 - [S35U4_HUMAN]	22.33	1	1	1	2	0	0		0			6.68372	22.33	1	2	103	11.1259	8.104
S4R468	Calcium uniporter protein, mitochondrial (Fragment) OS=Homo sapiens GN=MCU PE=1 SV=1 - [S4R468_HUMAN]	21.56	2	2	2	2	0	2213802		0			2.46658	21.56	2	2	167	18.958	8.47021
E7ETK0	40S ribosomal protein S24 OS=Homo sapiens GN=RPS24 PE=1 SV=1 - [E7ETK0_HUMAN]	21.37	3	2	2	2	0	4.31436e+06		0			4.88217	21.37	2	2	131	15.1873	10.8872
G5E9F5	MpV17 transgene, murine homolog, glomerulosclerosis, isoform CRA_d OS=Homo sapiens GN=MPV17 PE=1 SV=1 - [G5E9F5_HUMAN]	21.24	4	2	2	2	0	1.81685e+06					0	21.24	2	2	113	12.9498	9.51025
Q9Y333	U6 snRNA-associated Sm-like protein LSm2 OS=Homo sapiens GN=LSM2 PE=1 SV=1 - [LSM2_HUMAN]	21.05	1	2	2	2	0	3.81616e+06		0			3.14636	21.05	2	2	95	10.8276	6.52197
C9J9T0	Ribulose-5-phosphate-3-epimerase, isoform CRA_a OS=Homo sapiens GN=RPE PE=1 SV=1 - [C9J9T0_HUMAN]	20.94	8	2	2	2	0	3.76146e+06		0			1.66558	20.94	2	2	191	20.9582	5.09717
H0Y990	ATP-binding cassette sub-family E member 1 (Fragment) OS=Homo sapiens GN=ABCE1 PE=1 SV=1 - [H0Y990_HUMAN]	20.41	4	2	2	2	0	83370.4		0			1.7748	20.41	2	2	147	16.2257	8.80713
Q5VZR0	Golgi-associated plant pathogenesis-related protein 1 OS=Homo sapiens GN=GLIPR2 PE=1 SV=1 - [Q5VZR0_HUMAN]	20.31	3	2	2	2	0	3.14341e+06		0			4.27207	20.31	2	2	128	14.2041	9.51025
Q8NB37	Parkinson disease 7 domain-containing protein 1 OS=Homo sapiens GN=PDDC1 PE=1 SV=1 - [PDDC1_HUMAN]	20	6	2	2	2	0	4.45498e+06		0			6.12743	20	2	2	220	23.2826	6.60986
G3V267	Maleylacetoacetate isomerase OS=Homo sapiens GN=GSTZ1 PE=1 SV=1 - [G3V267_HUMAN]	19.58	8	2	2	2	0	2.39331e+06		0			1.77976	19.58	2	2	189	21.061	7.02002
X6RCK5	Dynactin subunit 3 (Fragment) OS=Homo sapiens GN=DCTN3 PE=1 SV=1 - [X6RCK5_HUMAN]	19.21	5	2	2	2	0	6.80723e+06					5.1361	19.21	2	2	151	17.2882	6.58057
D6RFL4	Monocyte differentiation antigen CD14 (Fragment) OS=Homo sapiens GN=CD14 PE=1 SV=1 - [D6RFL4_HUMAN]	18.78	2	2	2	2	0	2.10782e+06					5.48646	18.78	2	2	213	23.2981	5.26221
Q9BY32	Inosine triphosphate pyrophosphatase OS=Homo sapiens GN=ITPA PE=1 SV=2 - [ITPA_HUMAN]	18.56	1	2	2	2	0	1.73283e+06		0			3.96548	18.56	2	2	194	21.4319	5.65576
P32321	Deoxycytidylate deaminase OS=Homo sapiens GN=DCTD PE=1 SV=2 - [DCTD_HUMAN]	18.54	7	2	2	2	0	2.03634e+06		0			5.65783	18.54	2	2	178	20.0028	7.56201
P61769	Beta-2-microglobulin OS=Homo sapiens GN=B2M PE=1 SV=1 - [B2MG_HUMAN]	18.49	1	1	1	2	0	3.96456e+07		0			4.81824	18.49	1	2	119	13.7059	6.52197
K7EIJ4	Ran-binding protein 3 (Fragment) OS=Homo sapiens GN=RANBP3 PE=1 SV=1 - [K7EIJ4_HUMAN]	17.42	3	2	2	2	0	343508		0			0	17.42	2	2	155	16.9544	4.99561
P27169	Serum paraoxonase/arylesterase 1 OS=Homo sapiens GN=PON1 PE=1 SV=3 - [PON1_HUMAN]	17.18	1	2	2	2	0	3.86477e+06		0			2.60198	17.18	2	2	355	39.7062	5.22412
P07360	Complement component C8 gamma chain OS=Homo sapiens GN=C8G PE=1 SV=3 - [CO8G_HUMAN]	16.83	1	2	2	2	0	1.73843e+06		0			5.65464	16.83	2	2	202	22.2635	8.30908
A0A0A0MS15	Immunoglobulin heavy variable 3-49 OS=Homo sapiens GN=IGHV3-49 PE=1 SV=1 - [HV349_HUMAN]	16.81	1	1	2	2	0	509152		0			2.09641	16.81	2	2	119	13.0475	8.6167
Q5T446	Uroporphyrinogen decarboxylase (Fragment) OS=Homo sapiens GN=UROD PE=1 SV=1 - [Q5T446_HUMAN]	16.58	5	2	2	2	0	5.36692e+06		0			6.90063	16.58	2	2	193	21.4447	5.19873
Q9P000	COMM domain-containing protein 9 OS=Homo sapiens GN=COMMD9 PE=1 SV=2 - [COMD9_HUMAN]	16.16	2	2	2	2	0	967882		0			1.72119	16.16	2	2	198	21.8054	5.88428
Q9BRF8	Serine/threonine-protein phosphatase CPPED1 OS=Homo sapiens GN=CPPED1 PE=1 SV=3 - [CPPED_HUMAN]	15.61	1	2	2	2	0	3.61061e+06		0			3.56364	15.61	2	2	314	35.5259	6.20166
B4E2H8	Disks large homolog 1 OS=Homo sapiens GN=DLG1 PE=1 SV=1 - [B4E2H8_HUMAN]	15.14	20	2	2	2	0	3.89498e+06		0			3.57073	15.14	2	2	370	40.86	5.49072
Q9Y3C8	Ubiquitin-fold modifier-conjugating enzyme 1 OS=Homo sapiens GN=UFC1 PE=1 SV=3 - [UFC1_HUMAN]	13.77	1	2	2	2	0	1.01706e+06		0			5.67167	13.77	2	2	167	19.446	7.40088
O94811	Tubulin polymerization-promoting protein OS=Homo sapiens GN=TPPP PE=1 SV=1 - [TPPP_HUMAN]	13.24	1	2	2	2	0	1.77732e+06		0			5.33662	13.24	2	2	219	23.6792	9.43701
J3QTB2	MICOS complex subunit OS=Homo sapiens GN=CHCHD6 PE=1 SV=1 - [J3QTB2_HUMAN]	12.86	3	2	2	2	0	674919		0			3.71872	12.86	2	2	140	15.2938	9.08545
O60762	Dolichol-phosphate mannosyltransferase subunit 1 OS=Homo sapiens GN=DPM1 PE=1 SV=1 - [DPM1_HUMAN]	12.69	4	2	2	2	0	813851		0			2.54567	12.69	2	2	260	29.6158	9.56885
P61956	Small ubiquitin-related modifier 2 OS=Homo sapiens GN=SUMO2 PE=1 SV=3 - [SUMO2_HUMAN]	12.63	5	1	1	2	0	1.2473e+07		0			5.41038	12.63	1	2	95	10.8644	5.50342
Q99584	Protein S100-A13 OS=Homo sapiens GN=S100A13 PE=1 SV=1 - [S10AD_HUMAN]	12.24	1	1	1	2	0	2.60249e+06					4.57174	12.24	1	2	98	11.4641	6.16357
M0R1F7	Phospholipase D3 (Fragment) OS=Homo sapiens GN=PLD3 PE=1 SV=8 - [M0R1F7_HUMAN]	12.21	2	1	1	2	0	1.65116e+06					5.73021	12.21	1	2	213	23.602	5.51611
Q53S08	Putative uncharacterized protein RAB6C OS=Homo sapiens GN=RAB6C PE=2 SV=1 - [Q53S08_HUMAN]	12.2	2	1	2	2	0	3.40934e+06		0			5.12553	12.2	2	2	254	28.2243	6.7417
Q9BS40	Latexin OS=Homo sapiens GN=LXN PE=1 SV=2 - [LXN_HUMAN]	12.16	1	2	2	2	0	7.09263e+06		0			5.51739	12.16	2	2	222	25.7339	5.78271
F8W111	Carboxypeptidase M (Fragment) OS=Homo sapiens GN=CPM PE=1 SV=1 - [F8W111_HUMAN]	11.65	3	2	2	2	0	2.39404e+06		0			2.06971	11.65	2	2	249	28.2961	6.80029
G3V1U3	Methionine aminopeptidase 2 OS=Homo sapiens GN=METAP2 PE=1 SV=1 - [G3V1U3_HUMAN]	11.59	5	2	2	2	0	1.63159e+06		0			4.54452	11.59	2	2	328	35.9686	5.2749
P82673	28S ribosomal protein S35, mitochondrial OS=Homo sapiens GN=MRPS35 PE=1 SV=1 - [RT35_HUMAN]	11.46	2	2	2	2	0	2.16778e+06		0			3.9377	11.46	2	2	323	36.8211	8.23584
Q8IY95	Transmembrane protein 192 OS=Homo sapiens GN=TMEM192 PE=1 SV=1 - [TM192_HUMAN]	11.44	1	2	2	2	0	3.86501e+06		0			4.60887	11.44	2	2	271	30.9025	7.98682
E5RIZ4	39S ribosomal protein L15, mitochondrial (Fragment) OS=Homo sapiens GN=MRPL15 PE=1 SV=2 - [E5RIZ4_HUMAN]	11.39	2	2	2	2	0	1.61214e+06					5.59244	11.39	2	2	237	27.2195	9.56885
E9PIF4	Sialidase-1 OS=Homo sapiens GN=NEU1 PE=1 SV=1 - [E9PIF4_HUMAN]	11.24	2	2	2	2	0	2.11321e+06		0			4.21399	11.24	2	2	267	28.9815	5.97314
Q6IBS0	Twinfilin-2 OS=Homo sapiens GN=TWF2 PE=1 SV=2 - [TWF2_HUMAN]	11.17	3	2	2	2	0	3.1473e+06		0			6.17278	11.17	2	2	349	39.5233	6.84424
F5H0U5	Glycolipid transfer protein OS=Homo sapiens GN=GLTP PE=1 SV=1 - [F5H0U5_HUMAN]	11.05	3	2	2	2	0	1.25926e+06		0			3.96663	11.05	2	2	190	21.6453	6.53662
Q9Y5S9	RNA-binding protein 8A OS=Homo sapiens GN=RBM8A PE=1 SV=1 - [RBM8A_HUMAN]	10.92	1	1	1	2	0	2.41575e+06		0			6.08629	10.92	1	2	174	19.8767	5.71924
O75569	Interferon-inducible double-stranded RNA-dependent protein kinase activator A OS=Homo sapiens GN=PRKRA PE=1 SV=1 - [PRKRA_HUMAN]	10.86	4	2	2	2	0	1.31849e+06		0			3.43156	10.86	2	2	313	34.3825	8.41162
Q92522	Histone H1x OS=Homo sapiens GN=H1FX PE=1 SV=1 - [H1X_HUMAN]	10.8	1	2	2	2	0	1.44198e+06		0			2.53212	10.8	2	2	213	22.4735	10.7554
Q9BVG4	Protein PBDC1 OS=Homo sapiens GN=PBDC1 PE=1 SV=1 - [PBDC1_HUMAN]	10.73	1	2	2	2	0	1.01777e+06		0			4.06716	10.73	2	2	233	26.0407	4.79248
Q6UWP2	Dehydrogenase/reductase SDR family member 11 OS=Homo sapiens GN=DHRS11 PE=1 SV=1 - [DHR11_HUMAN]	10.38	3	2	2	2	0	1.97613e+06		0			2.61368	10.38	2	2	260	28.2903	6.63916
A0A140T998	Proteasome subunit beta type-8 OS=Homo sapiens GN=PSMB8 PE=1 SV=1 - [A0A140T998_HUMAN]	10.32	4	2	2	2	0	2.68693e+06		0			6.1218	10.32	2	2	252	27.8323	7.79639
H0YKU5	COP9 signalosome complex subunit 2 (Fragment) OS=Homo sapiens GN=COPS2 PE=1 SV=1 - [H0YKU5_HUMAN]	10.27	4	2	2	2	0	1.25772e+06		0			4.74375	10.27	2	2	263	30.8903	5.16064
Q8TDX5	2-amino-3-carboxymuconate-6-semialdehyde decarboxylase OS=Homo sapiens GN=ACMSD PE=1 SV=1 - [ACMSD_HUMAN]	10.12	1	2	2	2	0	705456		0			5.42028	10.12	2	2	336	38.0104	6.99072
Q8IVS2	Malonyl-CoA-acyl carrier protein transacylase, mitochondrial OS=Homo sapiens GN=MCAT PE=1 SV=2 - [FABD_HUMAN]	10	1	2	2	2	0	1.58097e+06		0			0	10	2	2	390	42.9341	8.71924
A0A0C4DG44	Serine protease HTRA2, mitochondrial (Fragment) OS=Homo sapiens GN=HTRA2 PE=1 SV=1 - [A0A0C4DG44_HUMAN]	9.93	2	2	2	2	0	3.24135e+06		0			3.72557	9.93	2	2	423	45.085	10.0083
F5H1Z6	PCTP-like protein (Fragment) OS=Homo sapiens GN=STARD10 PE=1 SV=1 - [F5H1Z6_HUMAN]	9.92	13	2	2	2	0	1.65023e+06		0			3.49982	9.92	2	2	252	29.0248	8.85107
P53367	Arfaptin-1 OS=Homo sapiens GN=ARFIP1 PE=1 SV=2 - [ARFP1_HUMAN]	9.92	1	2	2	2	0	823426		0			2.41084	9.92	2	2	373	41.7126	6.69775
B3KQ25	Proteasome activator complex subunit 3 OS=Homo sapiens GN=PSME3 PE=1 SV=1 - [B3KQ25_HUMAN]	9.84	9	2	2	2	0	2.53697e+06		0			0	9.84	2	2	193	22.4408	6.80029
E9PRJ3	Tetraspanin (Fragment) OS=Homo sapiens GN=CD151 PE=1 SV=1 - [E9PRJ3_HUMAN]	9.55	3	2	2	2	0	8.7871e+06		0			2.56345	9.55	2	2	178	19.7788	7.76709
O75629	Protein CREG1 OS=Homo sapiens GN=CREG1 PE=1 SV=1 - [CREG1_HUMAN]	9.55	1	1	1	2	0	1.05611e+07		0			3.78141	9.55	1	2	220	24.0593	7.59131
Q9NPH2	Inositol-3-phosphate synthase 1 OS=Homo sapiens GN=ISYNA1 PE=1 SV=1 - [INO1_HUMAN]	9.5	2	2	2	2	0	8.00997e+06		0			5.67099	9.5	2	2	558	61.0291	5.75732
A0A0B4J2H0	Immunoglobulin heavy variable 1-69D OS=Homo sapiens GN=IGHV1-69D PE=3 SV=1 - [HV69D_HUMAN]	9.4	5	1	1	2	0	4.77323e+06		0			4.23186	9.4	1	2	117	12.6523	8.47021
Q9UHI5	Large neutral amino acids transporter small subunit 2 OS=Homo sapiens GN=SLC7A8 PE=1 SV=1 - [LAT2_HUMAN]	9.35	4	2	2	2	0	1.73708e+06		0			4.31432	9.35	2	2	535	58.3436	5.93506
C9IZL7	Non-POU domain-containing octamer-binding protein (Fragment) OS=Homo sapiens GN=NONO PE=1 SV=1 - [C9IZL7_HUMAN]	9.18	4	1	2	2	0	5.22148e+06		0			4.48061	9.18	2	2	207	23.6583	9.80322
O00273	DNA fragmentation factor subunit alpha OS=Homo sapiens GN=DFFA PE=1 SV=1 - [DFFA_HUMAN]	9.06	2	2	2	2	0	1.52813e+06		0			2.22121	9.06	2	2	331	36.4995	4.79248
C9JJS3	Phosphoribosyl pyrophosphate synthase-associated protein 2 (Fragment) OS=Homo sapiens GN=PRPSAP2 PE=1 SV=1 - [C9JJS3_HUMAN]	8.76	5	1	1	2	0	906957		0			0	8.76	1	2	194	21.7463	9.05615
K7EPP7	DnaJ homolog subfamily C member 7 OS=Homo sapiens GN=DNAJC7 PE=1 SV=1 - [K7EPP7_HUMAN]	8.7	4	2	2	2	0	746929		0			2.44287	8.7	2	2	253	28.6852	8.48486
P22694	cAMP-dependent protein kinase catalytic subunit beta OS=Homo sapiens GN=PRKACB PE=1 SV=2 - [KAPCB_HUMAN]	8.55	10	1	2	2	0	1.71589e+06		0			2.929	8.55	2	2	351	40.597	8.77783
Q9UBV8	Peflin OS=Homo sapiens GN=PEF1 PE=1 SV=1 - [PEF1_HUMAN]	8.45	1	2	2	2	0	662327		0			0	8.45	2	2	284	30.3613	6.53662
Q4VXZ8	Peroxisomal 2,4-dienoyl-CoA reductase OS=Homo sapiens GN=DECR2 PE=1 SV=1 - [Q4VXZ8_HUMAN]	8.21	3	2	2	2	0	2.24897e+06		0			2.21772	8.21	2	2	280	29.4652	8.86572
O14495	Phospholipid phosphatase 3 OS=Homo sapiens GN=PLPP3 PE=1 SV=1 - [PLPP3_HUMAN]	8.04	1	2	2	2	0	683418					4.49549	8.04	2	2	311	35.093	9.14404
Q5TFE4	5'-nucleotidase domain-containing protein 1 OS=Homo sapiens GN=NT5DC1 PE=1 SV=1 - [NT5D1_HUMAN]	7.91	2	2	2	2	0	1.87313e+06		0			7.18752	7.91	2	2	455	51.8119	6.354
Q8WWC4	m-AAA protease-interacting protein 1, mitochondrial OS=Homo sapiens GN=MAIP1 PE=1 SV=1 - [MAIP1_HUMAN]	7.9	1	2	2	2	0	3.14385e+06		0			4.62553	7.9	2	2	291	32.524	9.17334
P12004	Proliferating cell nuclear antigen OS=Homo sapiens GN=PCNA PE=1 SV=1 - [PCNA_HUMAN]	7.66	1	2	2	2	0	7.48527e+06		0			2.41039	7.66	2	2	261	28.7503	4.69092
P49903	Selenide, water dikinase 1 OS=Homo sapiens GN=SEPHS1 PE=1 SV=2 - [SPS1_HUMAN]	7.65	1	2	2	2	0	1.72109e+06		0			5.80521	7.65	2	2	392	42.8827	5.97314
Q7Z434	Mitochondrial antiviral-signaling protein OS=Homo sapiens GN=MAVS PE=1 SV=2 - [MAVS_HUMAN]	7.59	1	2	2	2	0	1.39352e+06		0			3.95521	7.59	2	2	540	56.4931	5.51611
P06312	Immunoglobulin kappa variable 4-1 OS=Homo sapiens GN=IGKV4-1 PE=1 SV=1 - [KV401_HUMAN]	7.44	1	1	1	2	0	4.91804e+06		0			4.40059	7.44	1	2	121	13.3716	5.24951
Q96PU8	Protein quaking OS=Homo sapiens GN=QKI PE=1 SV=1 - [QKI_HUMAN]	7.33	2	2	2	2	0	731429		0			4.08327	7.33	2	2	341	37.6467	8.55811
O43866	CD5 antigen-like OS=Homo sapiens GN=CD5L PE=1 SV=1 - [CD5L_HUMAN]	7.2	1	2	2	2	0	1.3141e+06		0			4.42686	7.2	2	2	347	38.0629	5.46533
A0A075B7D9	TATA-binding protein-associated factor 2N OS=Homo sapiens GN=TAF15 PE=1 SV=1 - [A0A075B7D9_HUMAN]	6.9	2	1	2	2	0	3.45871e+06		0			4.6529	6.9	2	2	449	48.8094	5.08447
A0A0D9SFJ1	Coenzyme Q6 homolog, monooxygenase (Yeast), isoform CRA_a OS=Homo sapiens GN=COQ6 PE=1 SV=1 - [A0A0D9SFJ1_HUMAN]	6.87	2	2	2	2	0	1.091e+06		0			4.53332	6.87	2	2	393	43.1039	7.38623
Q96I24	Far upstream element-binding protein 3 OS=Homo sapiens GN=FUBP3 PE=1 SV=2 - [FUBP3_HUMAN]	6.64	1	1	2	2	0	1.06177e+06		0			1.83576	6.64	2	2	572	61.6022	8.38232
B4DFG0	Protein DEK OS=Homo sapiens GN=DEK PE=1 SV=1 - [B4DFG0_HUMAN]	6.63	5	2	2	2	0	904564		0			4.36059	6.63	2	2	347	39.4763	8.51416
P55010	Eukaryotic translation initiation factor 5 OS=Homo sapiens GN=EIF5 PE=1 SV=2 - [IF5_HUMAN]	6.5	3	2	2	2	0	2.44167e+06		0			2.45114	6.5	2	2	431	49.1918	5.57959
O43280	Trehalase OS=Homo sapiens GN=TREH PE=1 SV=2 - [TREA_HUMAN]	6.35	1	2	2	2	0	1.91327e+06		0			4.69455	6.35	2	2	583	66.5255	5.68115
A0A087WZA9	Transmembrane protein 120A (Fragment) OS=Homo sapiens GN=TMEM120A PE=1 SV=1 - [A0A087WZA9_HUMAN]	6.32	4	1	1	2	0	3.632e+06		0			2.41908	6.32	1	2	174	20.4466	8.29443
Q9NPY3	Complement component C1q receptor OS=Homo sapiens GN=CD93 PE=1 SV=3 - [C1QR1_HUMAN]	6.29	1	2	2	2	0	1.38152e+06		0			6.3211	6.29	2	2	652	68.5154	5.43994
G3V1C3	Apoptosis inhibitor 5 OS=Homo sapiens GN=API5 PE=1 SV=1 - [G3V1C3_HUMAN]	6.08	2	2	2	2	0	2.81775e+06		0			4.69017	6.08	2	2	510	57.5251	6.0874
O95218	Zinc finger Ran-binding domain-containing protein 2 OS=Homo sapiens GN=ZRANB2 PE=1 SV=2 - [ZRAB2_HUMAN]	6.06	1	2	2	2	0	1.09544e+06		0			3.7032	6.06	2	2	330	37.382	10.0083
H3BPZ1	Very-long-chain (3R)-3-hydroxyacyl-CoA dehydratase OS=Homo sapiens GN=HACD3 PE=1 SV=1 - [H3BPZ1_HUMAN]	5.93	3	2	2	2	0	1.46212e+06		0			2.599	5.93	2	2	337	40.0429	8.96826
Q08722	Leukocyte surface antigen CD47 OS=Homo sapiens GN=CD47 PE=1 SV=1 - [CD47_HUMAN]	5.88	1	2	2	2	0	5.25498e+06		0			2.15311	5.88	2	2	323	35.1907	7.21045
M0R2S2	Epidermal growth factor receptor substrate 15-like 1 OS=Homo sapiens GN=EPS15L1 PE=1 SV=1 - [M0R2S2_HUMAN]	5.82	3	2	2	2	0	1.03951e+06		0			2.44744	5.82	2	2	447	49.8263	5.13525
Q06203	Amidophosphoribosyltransferase OS=Homo sapiens GN=PPAT PE=1 SV=1 - [PUR1_HUMAN]	5.8	3	2	2	2	0	868849					1.71945	5.8	2	2	517	57.3624	6.75635
Q9Y371	Endophilin-B1 OS=Homo sapiens GN=SH3GLB1 PE=1 SV=1 - [SHLB1_HUMAN]	5.75	2	2	2	2	0	1.11898e+06		0			1.62646	5.75	2	2	365	40.7708	6.03662
Q9H9J2	39S ribosomal protein L44, mitochondrial OS=Homo sapiens GN=MRPL44 PE=1 SV=1 - [RM44_HUMAN]	5.72	1	2	2	2	0	1.27984e+06		0			4.24745	5.72	2	2	332	37.5117	8.39697
A0A087WZC4	Protein-glutamine gamma-glutamyltransferase 5 OS=Homo sapiens GN=TGM5 PE=1 SV=1 - [A0A087WZC4_HUMAN]	5.34	4	1	2	2	0	5.31764e+06		0			1.89252	5.34	2	2	637	71.7419	6.354
F8VZN8	Protein phosphatase 1 regulatory subunit 12A (Fragment) OS=Homo sapiens GN=PPP1R12A PE=1 SV=1 - [F8VZN8_HUMAN]	5.06	4	2	2	2	0	1.3904e+06		0			5.70622	5.06	2	2	692	76.487	5.31299
F8WCZ6	Complement C1s subcomponent OS=Homo sapiens GN=C1S PE=1 SV=1 - [F8WCZ6_HUMAN]	4.99	3	2	2	2	0	2.34197e+06		0			2.03429	4.99	2	2	521	57.482	5.45264
P23588	Eukaryotic translation initiation factor 4B OS=Homo sapiens GN=EIF4B PE=1 SV=2 - [IF4B_HUMAN]	4.91	2	2	2	2	0	598700		0			0	4.91	2	2	611	69.1103	5.73193
G3V4F7	Signal recognition particle 54 kDa protein OS=Homo sapiens GN=SRP54 PE=1 SV=1 - [G3V4F7_HUMAN]	4.77	2	2	2	2	0	1.62886e+06		0			3.144	4.77	2	2	440	48.6385	9.0415
Q8NHP8	Putative phospholipase B-like 2 OS=Homo sapiens GN=PLBD2 PE=1 SV=2 - [PLBL2_HUMAN]	4.75	1	2	2	2	0	1.5755e+06		0			3.82043	4.75	2	2	589	65.43	6.80029
P13674	Prolyl 4-hydroxylase subunit alpha-1 OS=Homo sapiens GN=P4HA1 PE=1 SV=2 - [P4HA1_HUMAN]	4.68	1	2	2	2	0	1.12046e+06		0			4.09053	4.68	2	2	534	61.011	6.01123
Q6ZVM7	TOM1-like protein 2 OS=Homo sapiens GN=TOM1L2 PE=1 SV=1 - [TM1L2_HUMAN]	4.54	3	2	2	2	0	806135		0			4.04291	4.54	2	2	507	55.5217	4.79248
Q7LBR1	Charged multivesicular body protein 1b OS=Homo sapiens GN=CHMP1B PE=1 SV=1 - [CHM1B_HUMAN]	4.52	1	1	1	2	0	1.15319e+06		0			1.70787	4.52	1	2	199	22.0952	8.104
O15269	Serine palmitoyltransferase 1 OS=Homo sapiens GN=SPTLC1 PE=1 SV=1 - [SPTC1_HUMAN]	4.44	1	2	2	2	0	459449		0			1.60356	4.44	2	2	473	52.7105	6.01123
O95352	Ubiquitin-like modifier-activating enzyme ATG7 OS=Homo sapiens GN=ATG7 PE=1 SV=1 - [ATG7_HUMAN]	4.41	8	2	2	2	0	1.21678e+06		0			0	4.41	2	2	703	77.9093	6.23975
P31513	Dimethylaniline monooxygenase [N-oxide-forming] 3 OS=Homo sapiens GN=FMO3 PE=1 SV=5 - [FMO3_HUMAN]	4.32	3	1	2	2	0	1.98261e+06		0			2.22521	4.32	2	2	532	59.9944	7.78174
Q5TA58	Protein argonaute-1 OS=Homo sapiens GN=AGO1 PE=1 SV=1 - [Q5TA58_HUMAN]	4.09	5	2	2	2	0	1.03507e+06		0			4.28939	4.09	2	2	782	88.8217	9.18799
Q9Y6W5	Wiskott-Aldrich syndrome protein family member 2 OS=Homo sapiens GN=WASF2 PE=1 SV=3 - [WASF2_HUMAN]	4.02	1	2	2	2	0	1.49504e+06		0			3.71743	4.02	2	2	498	54.2504	5.52881
Q6UVY6	DBH-like monooxygenase protein 1 OS=Homo sapiens GN=MOXD1 PE=1 SV=1 - [MOXD1_HUMAN]	3.92	1	2	2	2	0	2.04081e+06		0			2.59465	3.92	2	2	613	69.6077	6.43018
Q99805	Transmembrane 9 superfamily member 2 OS=Homo sapiens GN=TM9SF2 PE=1 SV=1 - [TM9S2_HUMAN]	3.92	1	2	2	2	0	2.92292e+06		0			3.46508	3.92	2	2	663	75.7255	7.44482
A0A0A0MRW5	F-box/LRR-repeat protein 13 OS=Homo sapiens GN=FBXL13 PE=4 SV=1 - [A0A0A0MRW5_HUMAN]	3.81	3	1	1	2	0	254624		0			0	3.81	1	2	683	78.5085	8.86572
P21980	Protein-glutamine gamma-glutamyltransferase 2 OS=Homo sapiens GN=TGM2 PE=1 SV=2 - [TGM2_HUMAN]	3.78	1	2	2	2	0	2.70549e+06		0			4.69178	3.78	2	2	687	77.2797	5.22412
Q8N392	Rho GTPase-activating protein 18 OS=Homo sapiens GN=ARHGAP18 PE=1 SV=3 - [RHG18_HUMAN]	3.77	1	2	2	2	0	683780		0			3.95438	3.77	2	2	663	74.9299	6.44287
Q15637	Splicing factor 1 OS=Homo sapiens GN=SF1 PE=1 SV=4 - [SF01_HUMAN]	3.76	1	2	2	2	0	826830		0			6.27551	3.76	2	2	639	68.2859	8.98291
Q7Z4V5	Hepatoma-derived growth factor-related protein 2 OS=Homo sapiens GN=HDGFRP2 PE=1 SV=1 - [HDGR2_HUMAN]	3.73	6	1	2	2	0	3.55547e+06		0			0	3.73	2	2	671	74.2722	7.48877
Q6PML9	Zinc transporter 9 OS=Homo sapiens GN=SLC30A9 PE=1 SV=1 - [ZNT9_HUMAN]	3.7	1	2	2	2	0	2.11904e+06		0			4.17641	3.7	2	2	568	63.4748	8.32373
H0Y2W2	ATPase family AAA domain-containing protein 3A (Fragment) OS=Homo sapiens GN=ATAD3A PE=1 SV=1 - [H0Y2W2_HUMAN]	3.67	5	2	2	2	0	459733		0			4.01668	3.67	2	2	572	64.3143	9.43701
Q4KMQ2	Anoctamin-6 OS=Homo sapiens GN=ANO6 PE=1 SV=2 - [ANO6_HUMAN]	3.63	1	2	2	2	0	4.48591e+06		0			2.02448	3.63	2	2	910	106.096	7.76709
E7EQB2	Lactotransferrin (Fragment) OS=Homo sapiens GN=LTF PE=1 SV=1 - [E7EQB2_HUMAN]	3.59	3	2	2	2	0	1.43403e+06		0			4.41787	3.59	2	2	696	76.5769	8.01611
O00461	Golgi integral membrane protein 4 OS=Homo sapiens GN=GOLIM4 PE=1 SV=1 - [GOLI4_HUMAN]	3.59	2	2	2	2	0	623701		0			0	3.59	2	2	696	81.8313	4.76709
D3DSM0	Integrin beta OS=Homo sapiens GN=ITGB2 PE=1 SV=1 - [D3DSM0_HUMAN]	3.51	10	2	2	2	0	198332		0			1.70899	3.51	2	2	712	78.3028	6.87354
H0YCG2	Lysosome-associated membrane glycoprotein 2 (Fragment) OS=Homo sapiens GN=LAMP2 PE=1 SV=1 - [H0YCG2_HUMAN]	3.49	2	1	1	2	0	2.955e+06		0			1.89255	3.49	1	2	258	28.2462	6.52197
O14744	Protein arginine N-methyltransferase 5 OS=Homo sapiens GN=PRMT5 PE=1 SV=4 - [ANM5_HUMAN]	3.45	6	2	2	2	0	833683		0			5.0006	3.45	2	2	637	72.6376	6.29053
O75475	PC4 and SFRS1-interacting protein OS=Homo sapiens GN=PSIP1 PE=1 SV=1 - [PSIP1_HUMAN]	3.4	4	1	2	2	0	2.97635e+06		0			2.07511	3.4	2	2	530	60.0667	9.12939
Q15424	Scaffold attachment factor B1 OS=Homo sapiens GN=SAFB PE=1 SV=4 - [SAFB1_HUMAN]	3.39	3	2	2	2	0	1.92801e+06		0			5.01163	3.39	2	2	915	102.58	5.46533
P32455	Guanylate-binding protein 1 OS=Homo sapiens GN=GBP1 PE=1 SV=2 - [GBP1_HUMAN]	3.38	1	2	2	2	0	835475		0			4.98002	3.38	2	2	592	67.8877	6.31592
P10074	Telomere zinc finger-associated protein OS=Homo sapiens GN=ZBTB48 PE=1 SV=2 - [TZAP_HUMAN]	3.34	3	1	2	2	0	5.15184e+06		0			1.95931	3.34	2	2	688	77.0042	8.17725
Q9Y625	Glypican-6 OS=Homo sapiens GN=GPC6 PE=1 SV=1 - [GPC6_HUMAN]	2.7	1	1	1	2	0	354936		0			5.96239	2.7	1	2	555	62.6949	5.41455
Q66K74	Microtubule-associated protein 1S OS=Homo sapiens GN=MAP1S PE=1 SV=2 - [MAP1S_HUMAN]	2.55	2	2	2	2	0	975074		0			4.93211	2.55	2	2	1059	112.142	7.29834
Q99523	Sortilin OS=Homo sapiens GN=SORT1 PE=1 SV=3 - [SORT_HUMAN]	2.53	2	2	2	2	0	669777		0			1.81651	2.53	2	2	831	92.0095	5.74463
Q6YHK3	CD109 antigen OS=Homo sapiens GN=CD109 PE=1 SV=2 - [CD109_HUMAN]	2.35	1	2	2	2	0	327566		0			0	2.35	2	2	1445	161.587	5.84619
O75844	CAAX prenyl protease 1 homolog OS=Homo sapiens GN=ZMPSTE24 PE=1 SV=2 - [FACE1_HUMAN]	2.32	1	1	1	2	0	456687		0			0	2.32	1	2	475	54.7775	7.48877
Q8NDH3	Probable aminopeptidase NPEPL1 OS=Homo sapiens GN=NPEPL1 PE=1 SV=3 - [PEPL1_HUMAN]	2.29	1	1	1	2	0	989750		0			3.76597	2.29	1	2	523	55.8255	6.87354
J3KSL8	Trafficking protein particle complex subunit 8 OS=Homo sapiens GN=TRAPPC8 PE=1 SV=1 - [J3KSL8_HUMAN]	2.27	4	1	2	2	0	2.41707e+06		0			5.9197	2.27	2	2	926	104.179	6.55127
F5GZZ9	Scavenger receptor cysteine-rich type 1 protein M130 OS=Homo sapiens GN=CD163 PE=1 SV=1 - [F5GZZ9_HUMAN]	2.16	3	2	2	2	0	829371		0			2.65107	2.16	2	2	1109	120.244	6.1001
Q2M389	WASH complex subunit 4 OS=Homo sapiens GN=WASHC4 PE=1 SV=2 - [WASC4_HUMAN]	1.96	3	2	2	2	0	537024		0			4.71772	1.96	2	2	1173	136.316	7.44482
A0A087X0K0	Collagen alpha-1(XV) chain OS=Homo sapiens GN=COL15A1 PE=1 SV=1 - [A0A087X0K0_HUMAN]	1.89	2	2	2	2	0	909910		0			2.0327	1.89	2	2	1374	139.972	4.98291
J3KQ96	Treacle protein (Fragment) OS=Homo sapiens GN=TCOF1 PE=1 SV=1 - [J3KQ96_HUMAN]	1.7	4	2	2	2	0	340443		0			3.76601	1.7	2	2	1414	144.04	8.29443
F5H7V9	Tenascin OS=Homo sapiens GN=TNC PE=1 SV=1 - [F5H7V9_HUMAN]	1.69	4	2	2	2	0	2.61469e+06		0			5.01436	1.69	2	2	1838	201.014	5.03369
Q9C0C2	182 kDa tankyrase-1-binding protein OS=Homo sapiens GN=TNKS1BP1 PE=1 SV=4 - [TB182_HUMAN]	1.33	1	2	2	2	0	401879		0			1.99517	1.33	2	2	1729	181.685	4.85596
D6RGG3	Collagen alpha-1(XII) chain OS=Homo sapiens GN=COL12A1 PE=1 SV=1 - [D6RGG3_HUMAN]	1.24	2	2	2	2	0	1.21899e+06		0			0	1.24	2	2	3062	332.996	5.52881
O15230	Laminin subunit alpha-5 OS=Homo sapiens GN=LAMA5 PE=1 SV=8 - [LAMA5_HUMAN]	0.92	1	2	2	2	0	0		0			2.24044	0.92	2	2	3695	399.479	7.02002
P46821	Microtubule-associated protein 1B OS=Homo sapiens GN=MAP1B PE=1 SV=2 - [MAP1B_HUMAN]	0.85	3	2	2	2	0	795303		0			1.92576	0.85	2	2	2468	270.468	4.80518
A0A140T8Z8	Tenascin-X (Fragment) OS=Homo sapiens GN=TNXB PE=1 SV=1 - [A0A140T8Z8_HUMAN]	0.82	11	2	2	2	0	413468		0			0	0.82	2	2	3296	358.438	5.13525
O95822	Malonyl-CoA decarboxylase, mitochondrial OS=Homo sapiens GN=MLYCD PE=1 SV=3 - [DCMC_HUMAN]	16.63	1	7	7	8	1.99451e+06	1.33036e+06	14.2056	13.59	6	7	1.86989	3.04	1	1	493	54.9688	8.95361
P27482	Calmodulin-like protein 3 OS=Homo sapiens GN=CALML3 PE=1 SV=2 - [CALL3_HUMAN]	34.9	3	3	4	7	9.65981e+06	315931	13.9131	34.9	4	6	1.88425	4.7	1	1	149	16.88	4.42432
Q04446	1,4-alpha-glucan-branching enzyme OS=Homo sapiens GN=GBE1 PE=1 SV=3 - [GLGB_HUMAN]	9.54	2	5	5	7	4.7269e+06	4.04752e+06	14.1306	9.54	5	6	0	2.42	1	1	702	80.4226	6.31592
Q9NRZ7	1-acyl-sn-glycerol-3-phosphate acyltransferase gamma OS=Homo sapiens GN=AGPAT3 PE=1 SV=1 - [PLCC_HUMAN]	11.97	1	4	4	6	2.41237e+06	4.34638e+06	10.1695	11.97	4	5	2.75733	2.66	1	1	376	43.3527	8.71924
H0YLL8	N-acetylgalactosamine kinase (Fragment) OS=Homo sapiens GN=GALK2 PE=1 SV=1 - [H0YLL8_HUMAN]	43.83	5	4	4	5	1.62408e+06	3.60305e+06	0	26.54	3	4	2.87925	17.28	1	1	162	17.9359	7.56201
Q6PHW0	Iodotyrosine deiodinase 1 OS=Homo sapiens GN=IYD PE=1 SV=2 - [IYD1_HUMAN]	13.49	5	3	3	5	476176	2.00053e+06	3.87253	13.49	3	4	2.09596	3.46	1	1	289	33.3385	7.60596
P50336	Protoporphyrinogen oxidase OS=Homo sapiens GN=PPOX PE=1 SV=1 - [PPOX_HUMAN]	12.16	4	4	4	5	616736	1.07547e+06	2.28082	12.16	4	4	2.51011	2.94	1	1	477	50.7337	8.1626
A0A087X0M8	Neural cell adhesion molecule L1-like protein OS=Homo sapiens GN=CHL1 PE=1 SV=1 - [A0A087X0M8_HUMAN]	5.04	2	1	4	5	780341	1.49145e+06	6.50169	5.04	4	4	2.15866	1.11	1	1	1171	130.713	5.79541
O00533	Neural cell adhesion molecule L1-like protein OS=Homo sapiens GN=CHL1 PE=1 SV=4 - [NCHL1_HUMAN]	4.97	1	1	4	5	529350	1.49145e+06	6.50169	4.97	4	4	2.15866	1.08	1	1	1208	134.987	5.75732
Q96LJ7	Dehydrogenase/reductase SDR family member 1 OS=Homo sapiens GN=DHRS1 PE=1 SV=1 - [DHRS1_HUMAN]	19.49	2	4	4	4	1.95309e+06	173704	5.05873	15.02	3	3	2.1855	4.47	1	1	313	33.8873	7.82568
Q7Z7K0	COX assembly mitochondrial protein homolog OS=Homo sapiens GN=CMC1 PE=1 SV=1 - [COXM1_HUMAN]	17.92	3	2	2	4	1.52573e+06	605963	6.15593	17.92	2	3	2.60085	9.43	1	1	106	12.4813	8.63135
H0YEF7	Phosphatidylinositol-binding clathrin assembly protein (Fragment) OS=Homo sapiens GN=PICALM PE=1 SV=1 - [H0YEF7_HUMAN]	16.89	6	1	3	4	1.25127e+06	1.73667e+06	4.8656	16.89	3	3	2.70516	3.97	1	1	302	31.4489	6.04932
C9JVB6	Mitochondrial ribonuclease P protein 1 (Fragment) OS=Homo sapiens GN=TRMT10C PE=1 SV=1 - [C9JVB6_HUMAN]	11.22	2	2	2	4	1.63759e+06	4.69087e+06	6.42071	11.22	2	3	3.39447	7.69	1	1	312	36.805	9.15869
Q96FC7	Phytanoyl-CoA hydroxylase-interacting protein-like OS=Homo sapiens GN=PHYHIPL PE=1 SV=3 - [PHIPL_HUMAN]	10.37	1	3	3	4	807729	2.14542e+06	6.1579	10.37	3	3	2.41941	2.66	1	1	376	42.459	6.41748
O75351	Vacuolar protein sorting-associated protein 4B OS=Homo sapiens GN=VPS4B PE=1 SV=2 - [VPS4B_HUMAN]	9.01	4	3	3	4	1.14625e+06	3.12795e+06	3.93451	9.01	3	3	2.92939	2.7	1	1	444	49.2715	7.2251
Q8IVH4	Methylmalonic aciduria type A protein, mitochondrial OS=Homo sapiens GN=MMAA PE=1 SV=1 - [MMAA_HUMAN]	8.85	3	3	3	4	1.11308e+06	1.06741e+06	4.04877	8.85	3	3	2.31078	4.07	1	1	418	46.5085	9.29053
E9PGT3	Ribosomal protein S6 kinase OS=Homo sapiens GN=RPS6KA1 PE=1 SV=1 - [E9PGT3_HUMAN]	7.6	22	3	4	4	1.03482e+06	982070	1.74433	4.42	3	3	2.14702	3.18	1	1	724	81.4202	7.97217
O43896	Kinesin-like protein KIF1C OS=Homo sapiens GN=KIF1C PE=1 SV=3 - [KIF1C_HUMAN]	3.63	6	1	3	4	664874	0	4.7091	3.63	3	3	0	1.18	1	1	1103	122.87	6.90283
H3BS66	Small integral membrane protein 1 OS=Homo sapiens GN=SMIM1 PE=1 SV=1 - [H3BS66_HUMAN]	59.46	2	2	2	3	979196	0	0	43.24	1	2	2.59366	59.46	1	1	37	4.18892	6.50732
P05386	60S acidic ribosomal protein P1 OS=Homo sapiens GN=RPLP1 PE=1 SV=1 - [RLA1_HUMAN]	51.75	1	2	2	3	3.73191e+06	3.2199e+07	2.42645	51.75	2	2	3.1831	14.04	1	1	114	11.5067	4.32275
Q7RTV0	PHD finger-like domain-containing protein 5A OS=Homo sapiens GN=PHF5A PE=1 SV=1 - [PHF5A_HUMAN]	25.45	1	2	2	3	335786	786767	0	25.45	2	2	0	11.82	1	1	110	12.397	8.41162
Q8N5G0	Small integral membrane protein 20 OS=Homo sapiens GN=SMIM20 PE=1 SV=3 - [SMI20_HUMAN]	20.9	1	1	1	3	3.01239e+06	732874	4.7915	20.9	1	2	2.77498	20.9	1	1	67	7.69711	9.86182
H3BSF1	Metallothionein OS=Homo sapiens GN=MT1G PE=3 SV=1 - [H3BSF1_HUMAN]	20.51	6	1	1	3	3.37978e+06	2.3496e+07	4.70118	20.51	1	2	2.71191	20.51	1	1	39	3.76732	7.32764
[truncated: 989 more rows]

## Sheet: UCSF
Accession	Description	ΣCoverage	Σ# Proteins	Σ# Unique Peptides	Σ# Peptides	Σ# PSMs	A5: Area	B5: Area	Score A2	Coverage A2	# Peptides A2	# PSM A2	Score B2	Coverage B2	# Peptides B2	# PSM B2	# AAs	MW [kDa]	calc. pI
	>sp|HBB_HUMAN|	97.26	5	19	25	662	2.99883e+10	1.5044e+10	1234.35	97.26	25	371	953.003	95.89	22	291	146	15.8573	7.28369
	>sp|HBA_HUMAN|	97.16	4	18	18	758	8.8823e+09	7.07589e+09	1538.03	95.74	16	452	1043.68	97.16	16	306	141	15.1169	8.67529
F5H793	L-lactate dehydrogenase B chain (Fragment) OS=Homo sapiens GN=LDHB PE=1 SV=1 - [F5H793_HUMAN]	95.1	1	1	12	248	7.86759e+08	9.03044e+08	375.932	93.14	11	120	418.577	95.1	12	128	102	10.7998	5.13525
P0DOY2	Immunoglobulin lambda constant 2 OS=Homo sapiens GN=IGLC2 PE=1 SV=1 - [IGLC2_HUMAN]	93.4	4	2	7	121	1.7025e+08	4.23559e+08	166.168	85.85	6	50	243.819	93.4	7	71	106	11.2865	7.23975
P02768	Serum albumin OS=Homo sapiens GN=ALB PE=1 SV=2 - [ALBU_HUMAN]	92.94	8	93	98	3113	2.1189e+10	2.36645e+10	5171.35	89.33	91	1407	6311.5	92.94	96	1706	609	69.3215	6.27783
A0A0B4J2A4	3-ketoacyl-CoA thiolase, mitochondrial OS=Homo sapiens GN=ACAA2 PE=1 SV=1 - [A0A0B4J2A4_HUMAN]	91.12	6	36	36	506	2.96145e+09	7.20721e+08	1381.69	91.12	36	347	616.143	86.8	32	159	394	41.5754	7.89893
P04792	Heat shock protein beta-1 OS=Homo sapiens GN=HSPB1 PE=1 SV=2 - [HSPB1_HUMAN]	90.24	3	14	14	60	1.50256e+08	1.3552e+08	100.38	74.63	10	26	136.449	87.32	13	34	205	22.7685	6.40479
Q99714	3-hydroxyacyl-CoA dehydrogenase type-2 OS=Homo sapiens GN=HSD17B10 PE=1 SV=3 - [HCD2_HUMAN]	89.27	2	18	18	109	1.34561e+08	1.39343e+08	218.348	89.27	17	56	213.106	89.27	17	53	261	26.9061	7.78174
P07148	Fatty acid-binding protein, liver OS=Homo sapiens GN=FABP1 PE=1 SV=1 - [FABPL_HUMAN]	88.98	2	14	14	106	3.12364e+08	2.02888e+08	186.403	82.68	13	58	144.776	86.61	12	48	127	14.1994	7.18115
P04406	Glyceraldehyde-3-phosphate dehydrogenase OS=Homo sapiens GN=GAPDH PE=1 SV=3 - [G3P_HUMAN]	88.96	2	31	31	722	3.57795e+09	3.12418e+09	1285.35	86.57	29	350	1415.31	85.67	29	372	335	36.0304	8.45557
Q03154	Aminoacylase-1 OS=Homo sapiens GN=ACY1 PE=1 SV=1 - [ACY1_HUMAN]	88.48	13	30	30	281	9.99831e+08	6.47061e+08	459.146	87.01	28	144	443.42	87.75	28	137	408	45.856	6.17627
P21695	Glycerol-3-phosphate dehydrogenase [NAD(+)], cytoplasmic OS=Homo sapiens GN=GPD1 PE=1 SV=4 - [GPDA_HUMAN]	88.25	1	27	27	173	3.41654e+08	2.58353e+08	316.206	82.52	25	89	297.733	88.25	27	84	349	37.5433	6.17627
B9A058	3-hydroxyisobutyryl-CoA hydrolase, mitochondrial OS=Homo sapiens GN=HIBCH PE=1 SV=1 - [B9A058_HUMAN]	87.73	4	3	17	81	6.74498e+07	4.22352e+07	151.64	82.21	16	50	100.232	81.6	12	31	163	18.6063	5.17334
P30086	Phosphatidylethanolamine-binding protein 1 OS=Homo sapiens GN=PEBP1 PE=1 SV=3 - [PEBP1_HUMAN]	87.7	1	18	18	253	3.53356e+09	3.04973e+09	416.088	87.7	18	115	507.303	87.7	18	138	187	21.0437	7.53271
P00558	Phosphoglycerate kinase 1 OS=Homo sapiens GN=PGK1 PE=1 SV=3 - [PGK1_HUMAN]	87.53	2	39	39	354	8.90441e+08	8.1573e+08	617.177	85.85	36	179	594.758	87.53	37	175	417	44.5861	8.104
	>sp|SODC_HUMAN|	86.93	3	12	12	132	5.36641e+08	6.14084e+08	266.743	86.93	10	67	256.961	86.93	10	65	153	15.7949	6.12549
P31949	Protein S100-A11 OS=Homo sapiens GN=S100A11 PE=1 SV=2 - [S10AB_HUMAN]	86.67	1	7	7	24	1.46016e+08	2.32648e+08	33.6136	86.67	7	11	40.0622	86.67	7	13	105	11.7328	7.12256
P60709	Actin, cytoplasmic 1 OS=Homo sapiens GN=ACTB PE=1 SV=1 - [ACTB_HUMAN]	86.13	18	13	28	491	3.0131e+09	4.16667e+09	826.088	72	26	219	1025.91	86.13	28	272	375	41.7097	5.47803
P30039	Phenazine biosynthesis-like domain-containing protein OS=Homo sapiens GN=PBLD PE=1 SV=2 - [PBLD_HUMAN]	86.11	3	21	21	144	2.11516e+08	2.04114e+08	236.903	86.11	20	67	267.489	86.11	21	77	288	31.7652	6.52197
P01834	Immunoglobulin kappa constant OS=Homo sapiens GN=IGKC PE=1 SV=2 - [IGKC_HUMAN]	85.98	1	10	10	165	2.42575e+08	5.89167e+08	266.1	85.98	10	70	362.218	85.98	9	95	107	11.7578	6.52197
Q08257	Quinone oxidoreductase OS=Homo sapiens GN=CRYZ PE=1 SV=1 - [QOR_HUMAN]	85.11	3	24	24	200	4.95502e+08	4.92844e+08	375.308	78.12	22	97	402.935	85.11	24	103	329	35.1845	8.44092
O75368	SH3 domain-binding glutamic acid-rich-like protein OS=Homo sapiens GN=SH3BGRL PE=1 SV=1 - [SH3L1_HUMAN]	85.09	1	9	9	26	2.98442e+07	3.27131e+07	44.6989	85.09	9	13	43.0598	83.33	7	13	114	12.7664	5.24951
Q9NQR4	Omega-amidase NIT2 OS=Homo sapiens GN=NIT2 PE=1 SV=1 - [NIT2_HUMAN]	84.06	3	23	23	124	1.88247e+08	1.24571e+08	233.716	84.06	23	72	170.843	84.06	19	52	276	30.5886	7.21045
P02042	Hemoglobin subunit delta OS=Homo sapiens GN=HBD PE=1 SV=2 - [HBD_HUMAN]	83.67	4	10	16	248	1.76358e+10	1.16325e+10	485.125	83.67	16	135	398.376	83.67	16	113	147	16.0453	8.04541
Q99497	Protein DJ-1 OS=Homo sapiens GN=PARK7 PE=1 SV=2 - [PARK7_HUMAN]	83.6	3	20	20	107	3.85869e+08	4.21851e+08	194.214	83.6	18	53	203.293	83.6	19	54	189	19.8785	6.78564
P37802	Transgelin-2 OS=Homo sapiens GN=TAGLN2 PE=1 SV=3 - [TAGL2_HUMAN]	83.42	4	18	18	86	1.57384e+08	1.78866e+08	143.989	77.39	15	39	165.149	83.42	18	47	199	22.3772	8.25049
P00491	Purine nucleoside phosphorylase OS=Homo sapiens GN=PNP PE=1 SV=2 - [PNPH_HUMAN]	83.39	4	21	21	100	9.76371e+07	1.00043e+08	143.486	81.31	18	43	202.836	79.58	20	57	289	32.0972	6.94678
Q7Z4W1	L-xylulose reductase OS=Homo sapiens GN=DCXR PE=1 SV=2 - [DCXR_HUMAN]	83.2	8	15	15	77	7.38514e+07	6.97928e+07	132.133	83.2	15	43	112.369	68.44	12	34	244	25.8966	8.104
P35754	Glutaredoxin-1 OS=Homo sapiens GN=GLRX PE=1 SV=2 - [GLRX1_HUMAN]	83.02	1	8	8	52	1.16401e+08	8.43955e+07	94.5044	83.02	7	28	81.3467	75.47	7	24	106	11.7682	8.08936
P05062	Fructose-bisphosphate aldolase B OS=Homo sapiens GN=ALDOB PE=1 SV=2 - [ALDOB_HUMAN]	82.97	2	30	30	627	2.90404e+09	3.0768e+09	1221.23	79.67	25	309	1266.12	79.95	28	318	364	39.4481	7.86963
P52758	Ribonuclease UK114 OS=Homo sapiens GN=HRSP12 PE=1 SV=1 - [UK114_HUMAN]	82.48	3	8	8	55	2.60281e+08	2.90576e+08	88.863	82.48	8	26	106.843	58.39	6	29	137	14.4846	8.67529
O94760	N(G),N(G)-dimethylarginine dimethylaminohydrolase 1 OS=Homo sapiens GN=DDAH1 PE=1 SV=3 - [DDAH1_HUMAN]	82.46	2	19	20	112	1.2981e+08	1.34338e+08	180.848	82.46	19	57	185.117	78.25	19	55	285	31.1019	5.80811
P35232	Prohibitin OS=Homo sapiens GN=PHB PE=1 SV=1 - [PHB_HUMAN]	82.35	6	18	18	72	4.3869e+07	8.42828e+07	94.0218	78.31	15	31	124.168	79.04	16	41	272	29.7859	5.75732
Q15365	Poly(rC)-binding protein 1 OS=Homo sapiens GN=PCBP1 PE=1 SV=2 - [PCBP1_HUMAN]	82.3	14	13	17	87	1.47467e+08	1.29037e+08	158.944	61.8	13	41	169.914	82.3	17	46	356	37.4739	7.09326
Q71U36	Tubulin alpha-1A chain OS=Homo sapiens GN=TUBA1A PE=1 SV=1 - [TBA1A_HUMAN]	82.26	13	3	29	195	3.41746e+08	4.35771e+08	344.875	73.61	26	98	347.924	79.38	27	97	451	50.1036	5.05908
P07437	Tubulin beta chain OS=Homo sapiens GN=TUBB PE=1 SV=2 - [TBB5_HUMAN]	82.21	17	5	29	247	7.51105e+08	7.15666e+08	382.381	73.42	26	114	458.515	82.21	29	133	444	49.639	4.89404
Q9BQE3	Tubulin alpha-1C chain OS=Homo sapiens GN=TUBA1C PE=1 SV=1 - [TBA1C_HUMAN]	82.18	12	3	28	183	3.19953e+08	4.35771e+08	316.47	73.5	25	93	306.504	79.29	26	90	449	49.8635	5.09717
P68371	Tubulin beta-4B chain OS=Homo sapiens GN=TUBB4B PE=1 SV=1 - [TBB4B_HUMAN]	82.02	21	4	30	270	7.51105e+08	7.15666e+08	438.114	73.26	27	129	491.21	82.02	30	141	445	49.799	4.89404
G3V1A4	Cofilin 1 (Non-muscle), isoform CRA_a OS=Homo sapiens GN=CFL1 PE=1 SV=1 - [G3V1A4_HUMAN]	81.88	7	8	12	83	4.14271e+08	5.23405e+08	136.038	76.51	10	35	179.523	81.88	12	48	149	16.8008	8.35303
P14550	Alcohol dehydrogenase [NADP(+)] OS=Homo sapiens GN=AKR1A1 PE=1 SV=3 - [AK1A1_HUMAN]	81.85	6	23	24	173	4.94013e+08	4.91965e+08	268.707	76.62	22	86	281.592	80.92	23	87	325	36.5499	6.78564
P05387	60S acidic ribosomal protein P2 OS=Homo sapiens GN=RPLP2 PE=1 SV=1 - [RLA2_HUMAN]	81.74	2	8	8	34	3.31988e+07	5.65962e+07	52.2806	80	6	14	71.0493	81.74	8	20	115	11.6578	4.53857
Q13228	Selenium-binding protein 1 OS=Homo sapiens GN=SELENBP1 PE=1 SV=2 - [SBP1_HUMAN]	81.36	7	33	33	155	2.14531e+08	2.09779e+08	218.625	71.61	30	70	274.333	75.21	29	85	472	52.3576	6.3667
P00352	Retinal dehydrogenase 1 OS=Homo sapiens GN=ALDH1A1 PE=1 SV=2 - [AL1A1_HUMAN]	80.84	6	31	34	198	3.56398e+08	4.85621e+08	305.859	73.25	29	88	386.723	80.64	33	110	501	54.827	6.72705
P24752	Acetyl-CoA acetyltransferase, mitochondrial OS=Homo sapiens GN=ACAT1 PE=1 SV=1 - [THIL_HUMAN]	80.8	3	34	36	401	5.90033e+08	7.60773e+08	774.883	80.8	36	209	711.063	80.8	35	192	427	45.1706	8.85107
F8VXZ7	Tubulin alpha-1A chain (Fragment) OS=Homo sapiens GN=TUBA1A PE=4 SV=1 - [F8VXZ7_HUMAN]	80.77	1	1	2	7	1.90625e+08	4.74288e+08	16.7655	80.77	2	4	15.4038	76.92	1	3	26	2.70219	4.89404
O00299	Chloride intracellular channel protein 1 OS=Homo sapiens GN=CLIC1 PE=1 SV=4 - [CLIC1_HUMAN]	80.5	1	17	17	66	1.54431e+08	1.97473e+08	109.962	64.73	16	34	105.534	76.76	15	32	241	26.9057	5.17334
Q06830	Peroxiredoxin-1 OS=Homo sapiens GN=PRDX1 PE=1 SV=1 - [PRDX1_HUMAN]	80.4	3	21	25	209	4.15029e+08	7.65234e+08	316.901	73.37	22	97	371.408	80.4	24	112	199	22.0963	8.1333
P51149	Ras-related protein Rab-7a OS=Homo sapiens GN=RAB7A PE=1 SV=1 - [RAB7A_HUMAN]	80.19	7	14	14	40	2.39751e+07	2.77869e+07	39.5153	42.51	8	15	72.5631	80.19	14	25	207	23.4748	6.69775
Q96KP4	Cytosolic non-specific dipeptidase OS=Homo sapiens GN=CNDP2 PE=1 SV=2 - [CNDP2_HUMAN]	80	17	36	36	238	3.59063e+08	4.5896e+08	366.528	75.16	31	105	436.172	80	36	133	475	52.8449	5.97314
Q9BVA1	Tubulin beta-2B chain OS=Homo sapiens GN=TUBB2B PE=1 SV=1 - [TBB2B_HUMAN]	80	11	1	27	209	7.51105e+08	7.15666e+08	326.708	71.24	24	95	404.868	80	27	114	445	49.9209	4.89404
P10809	60 kDa heat shock protein, mitochondrial OS=Homo sapiens GN=HSPD1 PE=1 SV=2 - [CH60_HUMAN]	79.93	7	50	50	525	7.37968e+08	1.01838e+09	967.848	78.36	46	258	1006.78	78.18	49	267	573	61.0164	5.87158
P50440	Glycine amidinotransferase, mitochondrial OS=Homo sapiens GN=GATM PE=1 SV=1 - [GATM_HUMAN]	79.91	5	36	36	539	2.78054e+09	2.87024e+09	934.392	69.5	31	255	1038.48	73.05	31	284	423	48.4243	8.04541
P10768	S-formylglutathione hydrolase OS=Homo sapiens GN=ESD PE=1 SV=2 - [ESTD_HUMAN]	79.79	4	18	18	65	1.08626e+08	7.75207e+07	114.155	76.24	14	34	97.7286	63.83	15	31	282	31.4425	7.02002
P30047	GTP cyclohydrolase 1 feedback regulatory protein OS=Homo sapiens GN=GCHFR PE=1 SV=3 - [GFRP_HUMAN]	79.76	3	4	4	24	4.94399e+07	3.82087e+07	46.9466	79.76	4	15	29.9117	70.24	3	9	84	9.69189	6.53662
P00325	Alcohol dehydrogenase 1B OS=Homo sapiens GN=ADH1B PE=1 SV=2 - [ADH1B_HUMAN]	79.73	8	14	26	162	1.22143e+08	1.67239e+08	241.903	67.73	21	72	313.986	77.87	25	90	375	39.8286	8.29443
P60174	Triosephosphate isomerase OS=Homo sapiens GN=TPI1 PE=1 SV=3 - [TPIS_HUMAN]	79.72	4	25	25	256	1.52273e+09	1.4224e+09	479.209	79.72	25	135	452.316	77.27	22	121	286	30.7717	5.92236
P00338	L-lactate dehydrogenase A chain OS=Homo sapiens GN=LDHA PE=1 SV=2 - [LDHA_HUMAN]	79.52	19	22	23	119	6.13094e+08	6.73559e+08	167.861	73.19	20	58	176.911	78.92	22	61	332	36.6654	8.26514
P49773	Histidine triad nucleotide-binding protein 1 OS=Homo sapiens GN=HINT1 PE=1 SV=2 - [HINT1_HUMAN]	79.37	5	7	7	43	1.2894e+08	1.12388e+08	64.011	79.37	7	22	63.8992	79.37	6	21	126	13.7931	6.94678
P80404	4-aminobutyrate aminotransferase, mitochondrial OS=Homo sapiens GN=ABAT PE=1 SV=3 - [GABT_HUMAN]	79.2	7	39	39	212	2.86126e+08	3.75487e+08	329.893	75.6	35	100	369.001	79.2	38	112	500	56.4026	7.95752
F8W1A4	Adenylate kinase 2, mitochondrial OS=Homo sapiens GN=AK2 PE=1 SV=1 - [F8W1A4_HUMAN]	78.88	5	6	17	124	2.34998e+08	1.61884e+08	224.77	78.45	16	66	197.843	70.69	15	58	232	25.6143	7.82568
P62736	Actin, aortic smooth muscle OS=Homo sapiens GN=ACTA2 PE=1 SV=1 - [ACTA_HUMAN]	78.51	8	1	24	192	1.8918e+09	3.04762e+09	260.354	68.97	21	83	341.123	75.86	23	109	377	41.9818	5.38916
P68032	Actin, alpha cardiac muscle 1 OS=Homo sapiens GN=ACTC1 PE=1 SV=1 - [ACTC_HUMAN]	78.51	9	1	25	257	1.8918e+09	3.04762e+09	343.259	71.88	22	110	453	75.86	24	147	377	41.9919	5.38916
E9PR44	Alpha-crystallin B chain (Fragment) OS=Homo sapiens GN=CRYAB PE=1 SV=1 - [E9PR44_HUMAN]	78.16	9	11	11	19	4.35431e+06	7.29033e+07	2.8372	4.6	1	1	56.7342	78.16	11	18	174	20.0183	7.03467
P06733	Alpha-enolase OS=Homo sapiens GN=ENO1 PE=1 SV=2 - [ENOA_HUMAN]	78.11	8	35	38	450	1.39455e+09	1.15591e+09	794.826	78.11	38	215	874.686	78.11	34	235	434	47.1393	7.38623
Q16836	Hydroxyacyl-coenzyme A dehydrogenase, mitochondrial OS=Homo sapiens GN=HADH PE=1 SV=3 - [HCDH_HUMAN]	78.03	3	17	17	156	4.51403e+08	3.52345e+08	307.756	78.03	17	83	272.15	75.8	16	73	314	34.2719	8.85107
O00244	Copper transport protein ATOX1 OS=Homo sapiens GN=ATOX1 PE=1 SV=1 - [ATOX1_HUMAN]	77.94	3	4	4	10	3.05718e+07	2.66075e+07	20.27	47.06	3	5	17.9863	77.94	4	5	68	7.39674	7.23975
P0CG04	Immunoglobulin lambda constant 1 OS=Homo sapiens GN=IGLC1 PE=1 SV=1 - [IGLC1_HUMAN]	77.36	3	1	6	45	1.69802e+08	4.23559e+08	55.0079	69.81	5	14	108.98	77.36	6	31	106	11.3406	7.86963
P05091	Aldehyde dehydrogenase, mitochondrial OS=Homo sapiens GN=ALDH2 PE=1 SV=2 - [ALDH2_HUMAN]	77.18	5	38	42	337	5.48058e+08	5.89836e+08	564.148	76.02	39	166	587.309	77.18	41	171	517	56.3456	7.04932
P0DP23	Calmodulin-1 OS=Homo sapiens GN=CALM1 PE=1 SV=1 - [CALM1_HUMAN]	77.18	12	9	11	64	1.6666e+08	1.7611e+08	94.8946	77.18	9	31	99.9131	77.18	11	33	149	16.8268	4.22119
Q96AB3	Isochorismatase domain-containing protein 2 OS=Homo sapiens GN=ISOC2 PE=1 SV=1 - [ISOC2_HUMAN]	77.07	3	8	8	51	2.54535e+08	2.2107e+08	103.858	77.07	8	28	87.8005	77.07	8	23	205	22.3228	7.76709
P08133	Annexin A6 OS=Homo sapiens GN=ANXA6 PE=1 SV=3 - [ANXA6_HUMAN]	76.82	9	17	46	192	7.82676e+07	1.39711e+08	267.111	70.88	38	86	318.319	72.36	43	106	673	75.8256	5.60498
O75874	Isocitrate dehydrogenase [NADP] cytoplasmic OS=Homo sapiens GN=IDH1 PE=1 SV=2 - [IDHC_HUMAN]	76.81	4	26	27	185	1.7056e+08	9.35114e+07	320.605	74.88	26	96	285.18	70.29	23	89	414	46.6295	7.00537
P30084	Enoyl-CoA hydratase, mitochondrial OS=Homo sapiens GN=ECHS1 PE=1 SV=4 - [ECHM_HUMAN]	76.55	1	24	24	352	9.43112e+08	6.92631e+08	703.193	76.55	24	202	507.011	66.9	20	150	290	31.3671	8.07471
P17174	Aspartate aminotransferase, cytoplasmic OS=Homo sapiens GN=GOT1 PE=1 SV=3 - [AATC_HUMAN]	76.51	1	26	26	112	3.78792e+08	2.06687e+08	217.736	71.67	23	62	168.494	72.64	22	50	413	46.2185	7.00537
Q5T2W1	Na(+)/H(+) exchange regulatory cofactor NHE-RF3 OS=Homo sapiens GN=PDZK1 PE=1 SV=2 - [NHRF3_HUMAN]	76.49	3	38	38	238	1.68817e+08	1.76409e+08	457.388	74.37	35	128	393.02	69.75	34	110	519	57.0939	5.5542
P02647	Apolipoprotein A-I OS=Homo sapiens GN=APOA1 PE=1 SV=1 - [APOA1_HUMAN]	76.4	2	35	35	200	5.33943e+08	7.90193e+08	282.46	75.66	32	94	344.579	73.03	33	106	267	30.7589	5.75732
	>sp|ANXA5_HUMAN|	76.18	6	25	26	122	1.50574e+08	2.10802e+08	154.616	73.04	23	55	202.375	76.18	26	67	319	35.7834	5.04639
P26038	Moesin OS=Homo sapiens GN=MSN PE=1 SV=3 - [MOES_HUMAN]	76.08	3	38	49	264	3.13398e+08	3.88211e+08	382.309	71.58	45	119	471.624	72.27	47	145	577	67.7778	6.40479
E9PKF3	Acetyl-CoA acetyltransferase, mitochondrial (Fragment) OS=Homo sapiens GN=ACAT1 PE=1 SV=1 - [E9PKF3_HUMAN]	75.93	1	1	3	27	1.20608e+08	1.04695e+08	61.9781	75.93	3	15	50.8722	48.15	2	12	54	5.41562	8.36768
	>sp|TRFE_HUMAN|	75.93	8	68	68	632	8.28343e+08	7.11462e+08	1196.38	75.93	66	326	1105.54	72.21	65	306	698	76.9996	7.12256
P07108	Acyl-CoA-binding protein OS=Homo sapiens GN=DBI PE=1 SV=2 - [ACBP_HUMAN]	75.86	3	6	6	32	5.34051e+07	5.66557e+07	55.1576	75.86	6	19	39.8216	65.52	5	13	87	10.038	6.56592
P50395	Rab GDP dissociation inhibitor beta OS=Homo sapiens GN=GDI2 PE=1 SV=2 - [GDIB_HUMAN]	75.73	7	23	32	128	8.30948e+07	1.37752e+08	198.787	75.73	31	63	213.257	74.83	30	65	445	50.6309	6.46826
Q6IB77	Glycine N-acyltransferase OS=Homo sapiens GN=GLYAT PE=1 SV=3 - [GLYAT_HUMAN]	75.68	2	15	15	145	3.81319e+08	2.31146e+08	256.537	72.64	14	75	236.991	75.68	15	70	296	33.902	8.1626
P14854	Cytochrome c oxidase subunit 6B1 OS=Homo sapiens GN=COX6B1 PE=1 SV=2 - [CX6B1_HUMAN]	75.58	2	8	8	47	1.48312e+08	1.5025e+08	64.3274	75.58	7	20	82.498	75.58	8	27	86	10.1857	7.04932
Q9Y696	Chloride intracellular channel protein 4 OS=Homo sapiens GN=CLIC4 PE=1 SV=4 - [CLIC4_HUMAN]	75.49	2	17	18	115	1.69773e+08	1.20827e+08	202.957	75.49	18	54	219.619	72.33	16	61	253	28.7537	5.59229
A0A0B4J2D5	Uncharacterized protein OS=Homo sapiens GN=LOC102724023 PE=1 SV=1 - [A0A0B4J2D5_HUMAN]	75.37	11	15	15	134	3.06881e+08	2.1846e+08	237.222	75.37	15	77	197.956	69.03	13	57	268	28.1247	8.26514
K7EJH8	Alpha-actinin-4 (Fragment) OS=Homo sapiens GN=ACTN4 PE=1 SV=1 - [K7EJH8_HUMAN]	75.27	1	2	15	94	5.56619e+07	1.77885e+08	134.371	64.84	11	39	203.181	75.27	15	55	182	21.417	6.69775
P28838	Cytosol aminopeptidase OS=Homo sapiens GN=LAP3 PE=1 SV=3 - [AMPL_HUMAN]	75.14	3	29	29	145	1.20936e+08	1.03164e+08	256.658	67.05	27	77	230.588	62.24	26	68	519	56.1308	7.92822
P07737	Profilin-1 OS=Homo sapiens GN=PFN1 PE=1 SV=2 - [PROF1_HUMAN]	75	3	13	13	93	2.57688e+08	3.66283e+08	152.698	75	12	49	137.904	68.57	12	44	140	15.0446	8.26514
P09110	3-ketoacyl-CoA thiolase, peroxisomal OS=Homo sapiens GN=ACAA1 PE=1 SV=2 - [THIK_HUMAN]	75	7	27	27	191	3.39898e+08	1.57026e+08	423.805	75	27	115	274.943	74.53	23	76	424	44.2639	8.44092
Q13011	Delta(3,5)-Delta(2,4)-dienoyl-CoA isomerase, mitochondrial OS=Homo sapiens GN=ECH1 PE=1 SV=2 - [ECH1_HUMAN]	75	5	20	20	206	3.42479e+08	2.13927e+08	424.199	75	20	121	280.668	65.85	17	85	328	35.7934	8.00146
	>sp|PPIA_HUMAN|	75	11	13	13	232	1.26324e+09	1.26874e+09	401.612	75	13	120	392.26	75	13	112	164	17.8698	7.81104
P27144	Adenylate kinase 4, mitochondrial OS=Homo sapiens GN=AK4 PE=1 SV=1 - [KAD4_HUMAN]	74.89	2	17	17	81	2.37378e+08	4.51376e+07	187.944	74.89	17	62	47.5791	69.51	11	19	223	25.2522	8.39697
P00505	Aspartate aminotransferase, mitochondrial OS=Homo sapiens GN=GOT2 PE=1 SV=3 - [AATM_HUMAN]	74.88	1	28	28	156	1.05463e+08	1.81016e+08	265.024	74.88	28	82	245.395	74.65	25	74	430	47.4873	9.01221
P50053	Ketohexokinase OS=Homo sapiens GN=KHK PE=1 SV=2 - [KHK_HUMAN]	74.83	2	18	18	100	1.93976e+08	1.47496e+08	189.882	61.74	16	51	185.782	72.48	17	49	298	32.5025	6.31592
	>sp|NQO2_HUMAN|	74.78	1	1	12	51	8.5366e+07	1.2044e+08	86.9024	74.78	12	27	84.2428	66.96	11	24	230	25.805	6.29053
A0A0U1RRL7	MMP24 antisense RNA 1 OS=Homo sapiens GN=MMP24-AS1 PE=1 SV=1 - [A0A0U1RRL7_HUMAN]	74.65	1	2	2	11	3.60551e+06	5.95019e+06	18.22	74.65	2	5	20.2413	74.65	2	6	71	7.6747	4.71631
P04632	Calpain small subunit 1 OS=Homo sapiens GN=CAPNS1 PE=1 SV=1 - [CPNS1_HUMAN]	74.63	11	10	12	39	3.35162e+07	3.57511e+07	59.7871	74.63	12	19	75.1807	64.93	10	20	268	28.2977	5.19873
Q01995	Transgelin OS=Homo sapiens GN=TAGLN PE=1 SV=4 - [TAGL_HUMAN]	74.63	3	18	18	102	1.60741e+08	1.21269e+08	154.077	71.64	17	51	155.258	67.66	17	51	201	22.5964	8.83643
P35558	Phosphoenolpyruvate carboxykinase, cytosolic [GTP] OS=Homo sapiens GN=PCK1 PE=1 SV=3 - [PCKGC_HUMAN]	74.6	1	36	39	147	2.85597e+08	1.51331e+07	405.864	74.6	39	126	67.6467	28.62	11	21	622	69.1497	6.13818
P58546	Myotrophin OS=Homo sapiens GN=MTPN PE=1 SV=2 - [MTPN_HUMAN]	74.58	2	6	6	32	8.54744e+06	1.55423e+07	53.7511	56.78	5	14	71.6077	74.58	6	18	118	12.8866	5.51611
P61604	10 kDa heat shock protein, mitochondrial OS=Homo sapiens GN=HSPE1 PE=1 SV=2 - [CH10_HUMAN]	74.51	4	10	10	112	5.51661e+08	5.36994e+08	165.141	74.51	10	59	151.613	66.67	9	53	102	10.9249	8.92432
P16083	Ribosyldihydronicotinamide dehydrogenase [quinone] OS=Homo sapiens GN=NQO2 PE=1 SV=5 - [NQO2_HUMAN]	74.46	4	1	12	50	8.5366e+07	1.2044e+08	81.6683	74.46	12	26	84.2428	66.67	11	24	231	25.902	6.29053
P18669	Phosphoglycerate mutase 1 OS=Homo sapiens GN=PGAM1 PE=1 SV=2 - [PGAM1_HUMAN]	74.41	3	18	18	125	281614088	2.44863e+08	213.259	74.41	18	67	199.41	74.02	16	58	254	28.7858	7.18115
Q08AH3	Acyl-coenzyme A synthetase ACSM2A, mitochondrial OS=Homo sapiens GN=ACSM2A PE=1 SV=2 - [ACS2A_HUMAN]	74.35	13	12	37	310	4.72667e+08	3.25452e+08	607.824	72.62	34	174	488.997	70.36	33	136	577	64.1818	8.08936
A0A087WUQ6	Glutathione peroxidase OS=Homo sapiens GN=GPX1 PE=1 SV=1 - [A0A087WUQ6_HUMAN]	74.26	2	11	11	44	6.91298e+07	8.39851e+07	71.8446	74.26	11	22	58.2059	58.91	10	22	202	21.9242	6.55127
Q9H2U2	Inorganic pyrophosphatase 2, mitochondrial OS=Homo sapiens GN=PPA2 PE=1 SV=2 - [IPYR2_HUMAN]	74.25	10	24	26	98	4.89088e+07	3.85482e+07	157.391	70.66	22	50	145.809	73.05	24	48	334	37.896	7.38623
	>sp|FABPH_HUMAN|	74.24	4	10	10	83	5.64207e+07	1.11845e+08	111.817	74.24	10	40	116.126	74.24	10	43	132	14.7177	6.80029
P07355	Annexin A2 OS=Homo sapiens GN=ANXA2 PE=1 SV=2 - [ANXA2_HUMAN]	74.04	24	30	30	150	7.28186e+07	3.08996e+08	166.79	57.23	18	47	369.334	74.04	30	103	339	38.5798	7.75244
P29401	Transketolase OS=Homo sapiens GN=TKT PE=1 SV=3 - [TKT_HUMAN]	74	5	30	30	168	1.2694e+08	1.39487e+08	287.576	68.38	27	80	313.058	74	30	88	623	67.8347	7.66455
P67936	Tropomyosin alpha-4 chain OS=Homo sapiens GN=TPM4 PE=1 SV=3 - [TPM4_HUMAN]	73.79	9	14	26	90	1.20586e+08	1.30162e+08	115.868	65.73	21	41	150.477	70.97	24	49	248	28.5045	4.69092
Q99798	Aconitate hydratase, mitochondrial OS=Homo sapiens GN=ACO2 PE=1 SV=2 - [ACON_HUMAN]	73.72	2	54	54	423	4.33623e+08	4.29041e+08	675.28	68.21	53	206	727.498	73.72	53	217	780	85.3719	7.60596
Q5VY30	Retinol binding protein 4, plasma, isoform CRA_b OS=Homo sapiens GN=RBP4 PE=1 SV=2 - [Q5VY30_HUMAN]	73.37	2	11	11	60	9.91635e+07	2.15626e+08	70.5316	58.79	10	21	137.13	73.37	11	39	199	22.9591	6.0874
P09382	Galectin-1 OS=Homo sapiens GN=LGALS1 PE=1 SV=2 - [LEG1_HUMAN]	73.33	1	8	8	28	2.35256e+07	6.97901e+07	26.9307	33.33	4	9	57.8041	73.33	8	19	135	14.7062	5.50342
P13804	Electron transfer flavoprotein subunit alpha, mitochondrial OS=Homo sapiens GN=ETFA PE=1 SV=1 - [ETFA_HUMAN]	73.27	9	22	22	144	3.7098e+08	2.14994e+08	294.274	73.27	21	81	226.139	72.07	19	63	333	35.0576	8.38232
P05937	Calbindin OS=Homo sapiens GN=CALB1 PE=1 SV=2 - [CALB1_HUMAN]	73.18	5	22	22	85	1.044e+08	1.06531e+08	116.099	66.28	17	34	162.729	73.18	22	51	261	30.006	4.83057
A0A087X0W7	Acyl-coenzyme A thioesterase 2, mitochondrial OS=Homo sapiens GN=ACOT2 PE=1 SV=1 - [A0A087X0W7_HUMAN]	73.16	3	1	22	71	1.68517e+08	1.07852e+08	122.165	68.65	20	38	101.347	67.46	19	33	421	46.263	7.02002
Q93088	Betaine--homocysteine S-methyltransferase 1 OS=Homo sapiens GN=BHMT PE=1 SV=2 - [BHMT1_HUMAN]	73.15	2	27	32	342	1.41707e+09	7.80338e+08	748.842	71.43	30	204	500.234	71.67	29	138	406	44.9699	7.03467
P09936	Ubiquitin carboxyl-terminal hydrolase isozyme L1 OS=Homo sapiens GN=UCHL1 PE=1 SV=2 - [UCHL1_HUMAN]	73.09	5	12	12	54	5.71925e+07	2.88449e+07	111.15	73.09	12	32	75.5375	52.47	10	22	223	24.8085	5.47803
P06576	ATP synthase subunit beta, mitochondrial OS=Homo sapiens GN=ATP5B PE=1 SV=3 - [ATPB_HUMAN]	72.97	4	19	28	446	7.46221e+08	1.15414e+09	692.753	72.21	25	194	905.937	72.97	28	252	529	56.5246	5.40186
O43707	Alpha-actinin-4 OS=Homo sapiens GN=ACTN4 PE=1 SV=2 - [ACTN4_HUMAN]	72.89	9	36	64	504	1.82745e+08	3.34225e+08	736.551	70.36	55	215	1024.79	71.79	63	289	911	104.788	5.43994
P13489	Ribonuclease inhibitor OS=Homo sapiens GN=RNH1 PE=1 SV=2 - [RINI_HUMAN]	72.89	10	22	22	91	6.95056e+07	7.80869e+07	162.334	62.91	18	43	178.853	72.89	22	48	461	49.9411	4.81787
P00966	Argininosuccinate synthase OS=Homo sapiens GN=ASS1 PE=1 SV=2 - [ASSY_HUMAN]	72.82	3	32	32	230	6.98083e+08	1.04479e+09	365.478	69.9	27	104	458.358	70.87	30	126	412	46.501	8.01611
P14618	Pyruvate kinase PKM OS=Homo sapiens GN=PKM PE=1 SV=4 - [KPYM_HUMAN]	72.69	9	19	39	239	4.37997e+08	5.28412e+08	424.58	72.69	37	116	435.34	72.69	38	123	531	57.9	7.84033
E5RIW3	Tubulin-specific chaperone A OS=Homo sapiens GN=TBCA PE=1 SV=1 - [E5RIW3_HUMAN]	72.62	5	9	9	32	3.47421e+07	3.85137e+07	57.9827	72.62	8	17	52.1451	70.24	6	15	84	10.074	4.62744
Q14894	Ketimine reductase mu-crystallin OS=Homo sapiens GN=CRYM PE=1 SV=1 - [CRYM_HUMAN]	72.61	6	15	15	66	1.4567e+08	8.55438e+07	133.624	72.61	15	36	107.342	72.61	15	30	314	33.7544	5.13525
P36871	Phosphoglucomutase-1 OS=Homo sapiens GN=PGM1 PE=1 SV=3 - [PGM1_HUMAN]	72.6	1	31	31	104	5.0749e+07	4.78822e+07	174.197	71.35	29	55	153.23	71.17	30	49	562	61.4105	6.75635
	>sp|CATA_HUMAN|	72.43	2	40	40	220	2.74848e+08	2.22569e+08	407.914	70.15	36	115	343.961	69.39	36	105	526	59.5877	7.38623
Q68CK6	Acyl-coenzyme A synthetase ACSM2B, mitochondrial OS=Homo sapiens GN=ACSM2B PE=1 SV=2 - [ACS2B_HUMAN]	72.1	10	8	37	331	6.07197e+08	3.45353e+08	660.145	70.36	35	194	471.365	68.63	33	137	577	64.2299	8.25049
P21796	Voltage-dependent anion-selective channel protein 1 OS=Homo sapiens GN=VDAC1 PE=1 SV=2 - [VDAC1_HUMAN]	72.08	2	17	18	205	9.20242e+07	1.52332e+08	274.757	68.55	15	84	416.291	72.08	18	121	283	30.7536	8.54346
Q15181	Inorganic pyrophosphatase OS=Homo sapiens GN=PPA1 PE=1 SV=2 - [IPYR_HUMAN]	71.97	2	14	16	59	7.3644e+07	5.26161e+07	104.979	71.28	15	31	103.964	71.97	15	28	289	32.6392	5.85889
P07237	Protein disulfide-isomerase OS=Homo sapiens GN=P4HB PE=1 SV=3 - [PDIA1_HUMAN]	71.85	12	34	34	135	7.24876e+07	7.86209e+07	216.063	63.98	32	68	212.352	70.28	30	67	508	57.0807	4.86865
A0A0A0MSS8	Aldo-keto reductase family 1 member C3 OS=Homo sapiens GN=AKR1C3 PE=1 SV=1 - [A0A0A0MSS8_HUMAN]	71.83	6	9	18	106	2.0696e+08	6.54466e+07	240.764	71.83	18	73	91.1661	65.94	14	33	323	36.8439	7.94287
	>sp|GSTP1_HUMAN|	71.77	5	16	16	113	8.9175e+08	7.04221e+08	217.924	71.77	16	58	206.86	71.77	13	55	209	23.21	5.64307
P55084	Trifunctional enzyme subunit beta, mitochondrial OS=Homo sapiens GN=HADHB PE=1 SV=3 - [ECHB_HUMAN]	71.73	6	32	32	207	3.39475e+08	2.04891e+08	372.561	69.83	30	115	290.78	70.04	29	92	474	51.2615	9.40771
Q13885	Tubulin beta-2A chain OS=Homo sapiens GN=TUBB2A PE=1 SV=1 - [TBB2A_HUMAN]	71.24	11	2	27	210	7.51105e+08	7.15666e+08	329.93	71.24	25	96	404.111	71.24	27	114	445	49.875	4.89404
P32119	Peroxiredoxin-2 OS=Homo sapiens GN=PRDX2 PE=1 SV=5 - [PRDX2_HUMAN]	71.21	2	16	17	116	2.29782e+08	5.27205e+08	180.405	71.21	17	63	161.297	66.67	16	53	198	21.8782	5.97314
Q15847	Adipogenesis regulatory factor OS=Homo sapiens GN=ADIRF PE=1 SV=1 - [ADIRF_HUMAN]	71.05	1	5	5	26	1.2647e+08	7.55171e+07	63.5237	71.05	4	14	54.7194	71.05	5	12	76	7.84997	5.31299
	>sp|CAH2_HUMAN|	71.04	5	20	20	147	5.42229e+08	4.21922e+08	260.505	57.92	18	72	268.781	70.27	19	75	259	29.0969	7.40088
Q14376	UDP-glucose 4-epimerase OS=Homo sapiens GN=GALE PE=1 SV=2 - [GALE_HUMAN]	70.98	5	14	14	41	3.97593e+07	3.24304e+07	80.5661	70.98	14	25	60.386	66.95	12	16	348	38.2573	6.72705
P02774	Vitamin D-binding protein OS=Homo sapiens GN=GC PE=1 SV=1 - [VTDB_HUMAN]	70.89	4	26	26	151	1.2206e+08	1.45832e+08	276.032	70.89	24	72	292.415	62.87	25	79	474	52.929	5.5415
Q9UBI6	Guanine nucleotide-binding protein G(I)/G(S)/G(O) subunit gamma-12 OS=Homo sapiens GN=GNG12 PE=1 SV=3 - [GBG12_HUMAN]	70.83	1	6	6	17	2.34642e+07	3.29368e+07	22.8615	70.83	5	8	28.8273	61.11	5	9	72	8.00117	8.96826
P16152	Carbonyl reductase [NADPH] 1 OS=Homo sapiens GN=CBR1 PE=1 SV=3 - [CBR1_HUMAN]	70.76	4	17	17	121	2.28009e+08	2.03336e+08	215.347	70.76	17	61	203.897	70.4	16	60	277	30.3559	8.32373
E5RK69	Annexin OS=Homo sapiens GN=ANXA6 PE=1 SV=1 - [E5RK69_HUMAN]	70.65	2	1	30	117	7.65006e+07	1.36097e+08	160.637	61.96	22	50	199.38	68.48	29	67	460	51.7442	6.04932
Q02252	Methylmalonate-semialdehyde dehydrogenase [acylating], mitochondrial OS=Homo sapiens GN=ALDH6A1 PE=1 SV=2 - [MMSA_HUMAN]	70.65	2	40	40	376	1.08761e+09	8.27844e+08	681.34	70.65	40	192	653.356	70.65	40	184	535	57.8027	8.49951
O75891	Cytosolic 10-formyltetrahydrofolate dehydrogenase OS=Homo sapiens GN=ALDH1L1 PE=1 SV=2 - [AL1L1_HUMAN]	70.51	8	46	46	192	1.2018e+08	1.70994e+08	270.069	63.86	39	86	339.902	68.07	44	106	902	98.7666	5.93506
Q14019	Coactosin-like protein OS=Homo sapiens GN=COTL1 PE=1 SV=3 - [COTL1_HUMAN]	70.42	2	14	14	51	9.79684e+07	1.04002e+08	88.9672	70.42	14	29	67.3142	63.38	12	22	142	15.935	5.66846
I6L8B7	Fatty acid-binding protein, epidermal OS=Homo sapiens GN=FABP5 PE=1 SV=1 - [I6L8B7_HUMAN]	70.3	3	5	5	10	2.73219e+06	8.10025e+06	6.37076	24.75	2	2	22.7742	70.3	5	8	101	11.2495	6.07471
Q9Y617	Phosphoserine aminotransferase OS=Homo sapiens GN=PSAT1 PE=1 SV=2 - [SERC_HUMAN]	70.27	1	21	21	116	1.85141e+08	1.04496e+08	213.07	70.27	21	67	148.766	60.54	17	49	370	40.3968	7.66455
P62820	Ras-related protein Rab-1A OS=Homo sapiens GN=RAB1A PE=1 SV=3 - [RAB1A_HUMAN]	70.24	29	7	13	42	7.3601e+07	1.07712e+08	65.9366	60	11	19	71.3594	66.34	12	23	205	22.6634	6.21436
P38606	V-type proton ATPase catalytic subunit A OS=Homo sapiens GN=ATP6V1A PE=1 SV=2 - [VATA_HUMAN]	70.02	3	29	29	143	1.16522e+08	1.81769e+08	194.439	60.78	24	59	297.261	64.18	26	84	617	68.2605	5.51611
P05166	Propionyl-CoA carboxylase beta chain, mitochondrial OS=Homo sapiens GN=PCCB PE=1 SV=3 - [PCCB_HUMAN]	69.94	14	28	28	125	9.75903e+07	9.95543e+07	182.887	65.49	24	54	234.121	68.27	27	71	539	58.1788	7.63525
P82909	28S ribosomal protein S36, mitochondrial OS=Homo sapiens GN=MRPS36 PE=1 SV=2 - [RT36_HUMAN]	69.9	2	6	6	22	1.53523e+07	2.30501e+07	27.308	68.93	5	9	41.7894	69.9	6	13	103	11.459	9.99365
O14880	Microsomal glutathione S-transferase 3 OS=Homo sapiens GN=MGST3 PE=1 SV=1 - [MGST3_HUMAN]	69.74	3	8	8	35	5.82441e+07	1.17484e+08	43.3181	34.21	5	13	73.811	69.74	8	22	152	16.5056	9.37842
P80723	Brain acid soluble protein 1 OS=Homo sapiens GN=BASP1 PE=1 SV=2 - [BASP1_HUMAN]	69.6	2	12	12	31	3.0066e+07	2.76159e+07	45.7328	69.16	8	12	59.6224	69.6	12	19	227	22.68	4.62744
O43598	2'-deoxynucleoside 5'-phosphate N-hydrolase 1 OS=Homo sapiens GN=DNPH1 PE=1 SV=1 - [DNPH1_HUMAN]	69.54	2	8	8	42	8.03592e+07	7.0707e+07	92.744	69.54	8	27	50.4608	54.02	5	15	174	19.0966	5.04639
Q9UBQ7	Glyoxylate reductase/hydroxypyruvate reductase OS=Homo sapiens GN=GRHPR PE=1 SV=1 - [GRHPR_HUMAN]	69.51	2	20	20	126	1.45827e+08	2.71575e+08	186.842	60.67	16	54	245.15	69.51	20	72	328	35.6457	7.38623
P02766	Transthyretin OS=Homo sapiens GN=TTR PE=1 SV=1 - [TTHY_HUMAN]	69.39	3	12	12	117	1.60464e+08	2.55865e+08	155.997	69.39	11	42	227.924	69.39	12	75	147	15.877	5.75732
P54868	Hydroxymethylglutaryl-CoA synthase, mitochondrial OS=Homo sapiens GN=HMGCS2 PE=1 SV=1 - [HMCS2_HUMAN]	69.29	2	39	39	481	2.68338e+09	7.28563e+07	1553.12	69.29	39	435	157.17	63.98	21	46	508	56.5994	8.1626
P02675	Fibrinogen beta chain OS=Homo sapiens GN=FGB PE=1 SV=2 - [FIBB_HUMAN]	69.25	2	39	39	257	1.43048e+08	2.01441e+08	402.383	68.43	36	116	492.73	68.64	35	141	491	55.8923	8.26514
P55072	Transitional endoplasmic reticulum ATPase OS=Homo sapiens GN=VCP PE=1 SV=4 - [TERA_HUMAN]	69.23	6	48	48	205	9.37289e+07	1.2418e+08	286.754	62.66	39	87	382.016	69.23	48	118	806	89.2657	5.26221
P61981	14-3-3 protein gamma OS=Homo sapiens GN=YWHAG PE=1 SV=2 - [1433G_HUMAN]	69.23	2	10	15	66	1.66508e+08	1.75599e+08	95.5025	69.23	15	32	98.4531	65.18	14	34	247	28.2849	4.89404
P30041	Peroxiredoxin-6 OS=Homo sapiens GN=PRDX6 PE=1 SV=3 - [PRDX6_HUMAN]	69.2	1	21	21	141	4.39096e+08	3.83739e+08	237.055	69.2	20	74	213.769	69.2	21	67	224	25.0192	6.37939
P00387	NADH-cytochrome b5 reductase 3 OS=Homo sapiens GN=CYB5R3 PE=1 SV=3 - [NB5R3_HUMAN]	69.1	2	15	15	59	4.33981e+07	9.70616e+07	65.2408	63.12	11	21	119.802	69.1	15	38	301	34.2127	7.59131
P21281	V-type proton ATPase subunit B, brain isoform OS=Homo sapiens GN=ATP6V1B2 PE=1 SV=3 - [VATB2_HUMAN]	69.08	4	17	27	112	4.79444e+07	1.30194e+08	148.102	62.04	23	46	218.443	69.08	27	66	511	56.4649	5.80811
P02652	Apolipoprotein A-II OS=Homo sapiens GN=APOA2 PE=1 SV=1 - [APOA2_HUMAN]	69	6	9	9	27	4.42869e+07	1.22786e+08	34.0997	47	7	13	48.4522	69	8	14	100	11.1679	6.62451
P40926	Malate dehydrogenase, mitochondrial OS=Homo sapiens GN=MDH2 PE=1 SV=3 - [MDHM_HUMAN]	68.93	2	23	23	192	7.72445e+08	6.54654e+08	380.44	68.93	21	109	296.18	60.06	19	83	338	35.4807	8.67529
[truncated: 3,410 more rows]

## Sheet: Caption
Caption- Raw data generated from matching tissues at two different mass spectrometry center
