# Supplementary material for: Near-Single-Cell Proteomics Profiling of the Proximal Tubular and Glomerulus of the Normal Human Kidney
Source: Front Med (Lausanne). 2020 Sep 17;7:499. doi: 10.3389/fmed.2020.00499 (PMC7533534; doi:10.3389/fmed.2020.00499)
Supplement: Supplementary file 3 [file Table_3.xlsx]

## Sheet: Sheet1
Protein Name	Uniqueness
C1S_HUMAN	Glomerular unique
CO8B_HUMAN	Glomerular unique
CD44_HUMAN	Glomerular unique
NDUS5_HUMAN	Glomerular unique
DREB_HUMAN	Glomerular unique
LSP1_HUMAN	Glomerular unique
EIF3H_HUMAN	Glomerular unique
LG3BP_HUMAN	Glomerular unique
PAXI_HUMAN	Glomerular unique
MTSSL_HUMAN	Glomerular unique
CPNE1_HUMAN	Glomerular unique
SARNP_HUMAN	Glomerular unique
FLII_HUMAN	Glomerular unique
ARL1_HUMAN	Glomerular unique
PLA2R_HUMAN	Glomerular unique
PON2_HUMAN	Glomerular unique
GTR1_HUMAN	Glomerular unique
KAP3_HUMAN	Glomerular unique
SCAM4_HUMAN	Glomerular unique
PYGL_HUMAN	Glomerular unique
STAM2_HUMAN	Glomerular unique
1A03_HUMAN	Glomerular unique
CA2D1_HUMAN	Glomerular unique
1B07_HUMAN	Glomerular unique
RD23A_HUMAN	Glomerular unique
NEBL_HUMAN	Glomerular unique
GBG2_HUMAN	Glomerular unique
RHOG_HUMAN	Glomerular unique
NXP20_HUMAN	Glomerular unique
IPKG_HUMAN	Glomerular unique
PSB10_HUMAN	Glomerular unique
KANK2_HUMAN	Glomerular unique
SYPL1_HUMAN	Glomerular unique
RBM3_HUMAN	Glomerular unique
THS7A_HUMAN	Glomerular unique
CPZIP_HUMAN	Glomerular unique
TSN9_HUMAN	Glomerular unique
GBG11_HUMAN	Glomerular unique
CD151_HUMAN	Glomerular unique
SMCO3_HUMAN	Glomerular unique
UTRO_HUMAN	Glomerular unique
GOLI4_HUMAN	Glomerular unique
BST2_HUMAN	Glomerular unique
MPP5_HUMAN	Glomerular unique
SYNP2_HUMAN	Glomerular unique
CD34_HUMAN	Glomerular unique
ITA8_HUMAN	Glomerular unique
PLPP1_HUMAN	Glomerular unique
EMAL1_HUMAN	Glomerular unique
T150C_HUMAN	Glomerular unique
CLD5_HUMAN	Glomerular unique
LAMA5_HUMAN	Glomerular unique
MYO1B_HUMAN	Glomerular unique
GMFG_HUMAN	Glomerular unique
MYO1D_HUMAN	Glomerular unique
FGF1_HUMAN	Glomerular unique
ELNE_HUMAN	Glomerular unique
CO4A5_HUMAN	Glomerular unique
MAP1B_HUMAN	Glomerular unique
MRP_HUMAN	Glomerular unique
CD109_HUMAN	Glomerular unique
PAR3L_HUMAN	Glomerular unique
MRGRF_HUMAN	Glomerular unique
S29A1_HUMAN	Glomerular unique
PODO_HUMAN	Glomerular unique
EVA1B_HUMAN	Glomerular unique
MYOF_HUMAN	Glomerular unique
ACE_HUMAN	PT unique
RT29_HUMAN	PT unique
ZO2_HUMAN	PT unique
ODPX_HUMAN	PT unique
DESM_HUMAN	PT unique
ACD11_HUMAN	PT unique
BDH_HUMAN	PT unique
APOD_HUMAN	PT unique
SLC31_HUMAN	PT unique
MISP3_HUMAN	PT unique
S22AD_HUMAN	PT unique
OGDHL_HUMAN	PT unique
SDC1_HUMAN	PT unique
NDUB8_HUMAN	PT unique
SC5A8_HUMAN	PT unique
S23A1_HUMAN	PT unique
GSHB_HUMAN	PT unique
S13A2_HUMAN	PT unique
NPT4_HUMAN	PT unique
AGM1_HUMAN	PT unique
UD2A1_HUMAN	PT unique
NDUA3_HUMAN	PT unique
TIG_HUMAN	PT unique
OCAD2_HUMAN	PT unique
CLRN3_HUMAN	PT unique
